# Supplementary material for: Genome-wide RNA interference analysis of renal carcinoma survival regulators identifies MCT4 as a Warburg effect metabolic target
Source: PubMed Central journal article supplement (PMC3504091; doi:10.1002/path.4006), 2012-04-18
Supplement: path0227-0146-SD1.pdf [file path0227-0146-SD1.pdf]

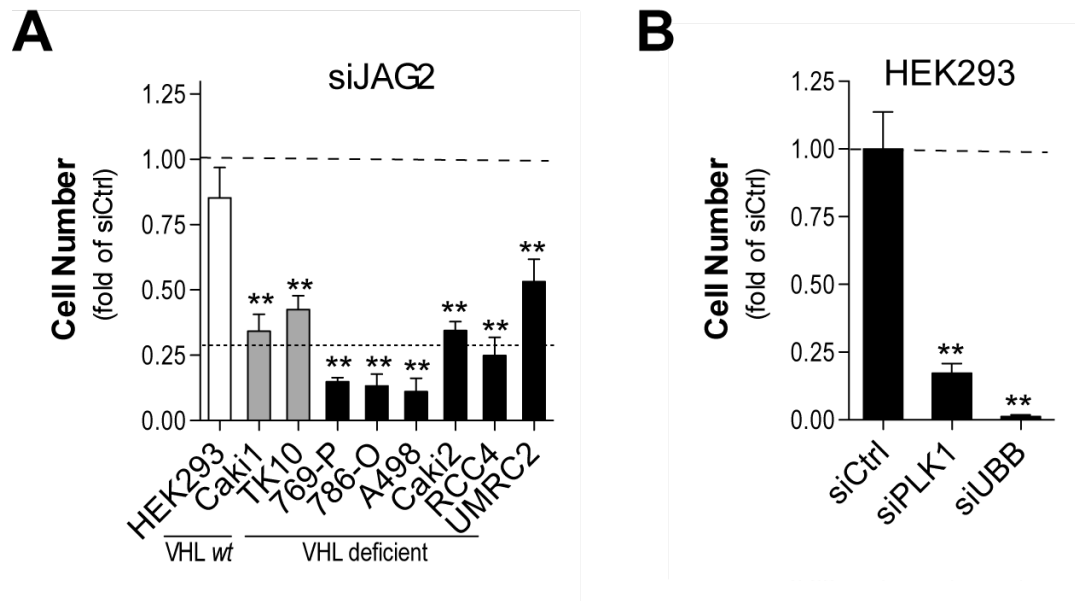

**Figure S1**

A) A panel of renal cell carcinoma cell lines is highly sensitive to silencing of JAG2. Four days after transfection with JAG2 siRNAs cell numbers were determined and normalised to non-targeting siRNAs. The embryonic kidney cell line HEK293 was used as a control. B) Silencing of PLK1 and UBB efficiently reduce cell numbers in HEK293 four days after transfection. Cell numbers were normalised to that of non-targeting siRNA. Graphs shows mean  $\pm$  SD (n=6). \*\* p < 0.001
