# Supplementary material for: Genome-wide RNA interference analysis of renal carcinoma survival regulators identifies MCT4 as a Warburg effect metabolic target
Source: PubMed Central journal article supplement (PMC3504091; doi:10.1002/path.4006), 2012-04-18
Supplement: path0227-0146-SD6.pdf [file path0227-0146-SD6.pdf]

| <b>GeneID</b> | <b>GeneName</b> | <b>Z-score</b> | <b>GeneID</b> | <b>GeneName</b> | <b>Z-score</b> |
|---------------|-----------------|----------------|---------------|-----------------|----------------|
| NM_001034     | RRM2            | -12.16         | NM_021009     | UBC             | -10.43         |
| NM_001033     | RRM1            | -10.25         | NM_018225     | SMU1            | -9.84          |
| XM_371107     | LOC388460       | -9.34          | XM_292836     | LOC342994       | -9.04          |
| NM_000978     | RPL23           | -8.88          | NM_015414     | RPL36           | -8.51          |
| NM_007209     | RPL35           | -8.49          | NM_003333     | UBA52           | -8.31          |
| NM_003973     | RPL14           | -8.16          | NM_080662     | PEX11G          | -8.14          |
| XM_208281     | LOC285053       | -8.12          | NM_001997     | FAU             | -8.08          |
| NM_032040     | CCDC8           | -8.06          | XM_209178     | LOC284393       | -7.97          |
| NM_004523     | KIF11           | -7.52          | XM_370872     | LOC388132       | -7.47          |
| XM_371757     | LOC389305       | -7.42          | XM_375543     | LOC400652       | -7.35          |
| NM_012433     | SF3B1           | -7.29          | NM_178431     | LCE3A           | -7.13          |
| NM_002786     | PSMA1           | -7.08          | NM_014814     | P44S10          | -7.08          |
| XM_371781     | LOC389342       | -7             | XM_371853     | LOC389435       | -6.76          |
| XM_371115     | LOC388474       | -6.76          | NM_001005     | RPS3            | -6.71          |
| NM_005030     | PLK1            | -6.7           | XM_039702     | LOC145767       | -6.66          |
| XM_034594     | KIAA1604        | -6.59          | NM_005877     | SF3A1           | -6.57          |
| NM_002952     | RPS2            | -6.55          | XM_087499     | LOC152663       | -6.53          |
| NM_002875     | RAD51           | -6.45          | XM_371160     | LOC388532       | -6.45          |
| NM_005441     | CHAF1B          | -6.43          | NM_003103     | SON             | -6.42          |
| XM_373633     | LOC388134       | -6.4           | NM_018140     | FLJ10565        | -6.36          |
| XM_371023     | LOC388344       | -6.34          | XM_370713     | LOC387907       | -6.31          |
| NM_002696     | POLR2G          | -6.22          | NM_032704     | TUBA6           | -6.18          |
| XM_371843     | LOC389425       | -6.18          | XM_056681     | LOC144581       | -6.17          |
| NM_001009     | RPS5            | -6.06          | NM_001024     | RPS21           | -6.04          |
| NM_004766     | COPB2           | -6.02          | NM_005805     | PSMD14          | -6.01          |
| NM_138484     | SGOL1           | -5.91          | NM_001237     | CCNA2           | -5.9           |
| XM_371330     | LOC388720       | -5.89          | NM_002295     | LAMR1           | -5.87          |
| NM_002812     | PSMD8           | -5.87          | NM_007104     | RPL10A          | -5.87          |
| NM_001168     | BIRC5           | -5.76          | NM_020238     | INCENP          | -5.76          |
| NM_006930     | SKP1A           | -5.75          | XM_209704     | LOC285658       | -5.71          |
| NM_001416     | EIF4A1          | -5.64          | NM_000994     | RPL32           | -5.62          |
| NM_030931     | DEFB126         | -5.62          | NM_003170     | SUPT6H          | -5.6           |
| XM_114317     | LOC200916       | -5.59          | XM_016713     | LOC146053       | -5.57          |
| XM_373343     | LOC392447       | -5.54          | XM_376154     | LOC401019       | -5.5           |
| NM_012177     | FBXO5           | -5.41          | NM_016633     | ERAF            | -5.33          |
| NM_024011     | CDC2L2          | -5.3           | NM_012112     | TPX2            | -5.25          |
| NM_004094     | EIF2S1          | -5.23          | XM_029805     | LOC90193        | -5.22          |
| XM_371151     | LOC388519       | -5.2           | NM_015932     | C13ORF12        | -5.18          |
| XM_371470     | LOC388907       | -5.15          | XM_086494     | LOC149329       | -5.13          |
| NM_006013     | RPL10           | -5.11          | NM_173687     | FLJ37131        | -5.08          |
| XM_291428     | LOC343153       | -5.03          | NM_004856     | KIF23           | -5.02          |
| NM_000998     | RPL37A          | -5.01          | NM_003755     | EIF3S4          | -5             |
| NM_018955     | UBB             | -4.99          | NM_002140     | HNRPK           | -4.91          |
| NM_014338     | PISD            | -4.91          | XM_034640     | LOC158345       | -4.88          |
| XM_047083     | LOC92755        | -4.88          | NM_004207     | SLC16A3         | -4.87          |

|              |           |       |           |               |       |
|--------------|-----------|-------|-----------|---------------|-------|
| NM_016128    | COPG      | -4.87 | NM_182583 | FLJ38374      | -4.84 |
| NM_006083    | IK        | -4.82 | NM_014740 | DDX48         | -4.8  |
| NM_030763    | NSBP1     | -4.8  | NM_001274 | CHEK1         | -4.79 |
| NM_001259    | CDK6      | -4.76 | NM_001253 | CDC5L         | -4.76 |
| NM_015077    | SARM1     | -4.75 | NM_145662 | SPANXA2       | -4.72 |
| NM_006072    | CCL26     | -4.71 | NM_005303 | GPR40         | -4.7  |
| NM_001708    | OPN1SW    | -4.67 | NM_194295 | DKFZP43411020 | -4.67 |
| NM_018518    | MCM10     | -4.66 | NM_012245 | SKIIP         | -4.65 |
| NM_018685    | ANLN      | -4.64 | NM_002787 | PSMA2         | -4.63 |
| XM_370727    | LOC387930 | -4.57 | NM_017431 | PRKAG3        | -4.56 |
| NM_001898    | CST1      | -4.56 | NM_001813 | CENPE         | -4.55 |
| NM_002410    | MGAT5     | -4.53 | NM_015956 | MRPL4         | -4.53 |
| XM_379594    | LOC286149 | -4.53 | NM_032680 | MGC4266       | -4.52 |
| NM_138820    | MGC2198   | -4.51 | NM_006565 | CTCF          | -4.5  |
| NM_006362    | NXF1      | -4.5  | NM_194303 | C10ORF39      | -4.48 |
| NM_003318    | TTK       | -4.47 | NM_004958 | FRAP1         | -4.44 |
| NM_004247    | U5-116KD  | -4.44 | NM_005008 | NHP2L1        | -4.41 |
| NM_006445    | PRPF8     | -4.4  | NM_004568 | SERPINB6      | -4.4  |
| NM_006325    | RAN       | -4.37 | NM_016057 | COPZ1         | -4.37 |
| XM_165448    | LOC220717 | -4.36 | NM_153260 | FLJ36812      | -4.33 |
| NM_173678    | FLJ40722  | -4.32 | NM_005187 | CBFA2T3       | -4.29 |
| NM_001004353 | LOC441476 | -4.25 | NM_014502 | PRP19         | -4.24 |
| NM_032875    | FBXL20    | -4.22 | XM_377761 | LOC402100     | -4.21 |
| NM_003173    | SUV39H1   | -4.2  | NM_002945 | RPA1          | -4.19 |
| NM_018383    | WDR33     | -4.19 | NM_004965 | HMG1          | -4.18 |
| NM_001211    | BUB1B     | -4.17 | NM_005115 | MVP           | -4.17 |
| NM_000969    | RPL5      | -4.16 | NM_014756 | CH-TOG        | -4.16 |
| XM_058721    | LOC123722 | -4.16 | NM_002946 | RPA2          | -4.15 |
| XM_062912    | LOC122038 | -4.14 | NM_031287 | SF3B5         | -4.12 |
| NM_145273    | TREM4     | -4.11 | NM_001101 | ACTB          | -4.1  |
| NM_052997    | ANKRD30A  | -4.1  | XM_372048 | LOC389672     | -4.1  |
| XM_374437    | LOC392670 | -4.1  | NM_005387 | NUP98         | -4.09 |
| NM_018093    | FLJ10439  | -4.08 | NM_001067 | TOP2A         | -4.07 |
| NM_003908    | EIF2S2    | -4.07 | NM_017777 | FLJ20345      | -4.07 |
| NM_194293    | CMYA1     | -4.07 | NM_006582 | GMEB1         | -4.06 |
| NM_000937    | POLR2A    | -4.05 | NM_002811 | PSMD7         | -4.05 |
| XM_294473    | LOC346950 | -4.04 | NM_000975 | RPL11         | -4.03 |
| NM_012423    | RPL13A    | -4.03 | NM_020127 | TUFT1         | -4.02 |
| NM_017584    | ALDRL6    | -4    | NM_000581 | GPX1          | -3.99 |
| NM_005262    | GFER      | -3.99 | NM_198442 | FLJ45651      | -3.99 |
| NM_004763    | ITGB1BP1  | -3.98 | NM_021974 | POLR2F        | -3.98 |
| XM_375912    | LOC400840 | -3.97 | NM_004122 | GHSR          | -3.94 |
| NM_004315    | ASAH1     | -3.94 | NM_000788 | DCK           | -3.93 |
| NM_032342    | C9ORF125  | -3.93 | NM_015925 | LISCH7        | -3.93 |
| NM_007165    | SF3A2     | -3.93 | NM_031217 | KIF18A        | -3.91 |
| NM_003609    | HIRIP3    | -3.91 | NM_005489 | SH2D3C        | -3.9  |

|           |           |       |           |               |       |
|-----------|-----------|-------|-----------|---------------|-------|
| NM_138347 | ZNF551    | -3.9  | NM_006107 | OA48-18       | -3.89 |
| NM_004502 | HOXB7     | -3.88 | NM_006246 | PPP2R5E       | -3.87 |
| NM_018159 | NUDT11    | -3.87 | NM_025047 | FLJ22595      | -3.87 |
| XM_036729 | USP41     | -3.87 | XM_377760 | LOC402098     | -3.87 |
| NM_145699 | APOBEC3A  | -3.86 | NM_198184 | OSTN          | -3.85 |
| NM_003400 | XPO1      | -3.84 | XM_058073 | NUP205        | -3.82 |
| NM_019077 | UGT1A7    | -3.82 | XM_015717 | LOC149224     | -3.82 |
| XM_087089 | KIAA0007  | -3.81 | NM_000083 | CLCN1         | -3.8  |
| XM_012219 | LOC144483 | -3.8  | XM_379694 | LOC401577     | -3.8  |
| NM_003707 | RUVBL1    | -3.79 | NM_004643 | PABPN1        | -3.78 |
| NM_002954 | RPS27A    | -3.78 | NM_004610 | TCP10         | -3.78 |
| NM_032306 | SPATA11   | -3.78 | NM_133459 | FLJ30681      | -3.78 |
| NM_018903 | PCDHA12   | -3.76 | NM_003466 | PAX8          | -3.76 |
| XM_375698 | LOC400745 | -3.76 | NM_019610 | KAT3          | -3.75 |
| NM_005471 | GNPDA1    | -3.74 | NM_002808 | PSMD2         | -3.72 |
| NM_000938 | POLR2B    | -3.72 | NM_006493 | CLN5          | -3.72 |
| NM_005845 | ABCC4     | -3.72 | NM_133492 | ASAH3         | -3.72 |
| NM_000449 | RFX5      | -3.71 | NM_015360 | SKIV2L2       | -3.71 |
| NM_021980 | OPTN      | -3.7  | NM_000972 | RPL7A         | -3.7  |
| NM_006585 | CCT8      | -3.69 | XM_371644 | MUSTN1        | -3.69 |
| NM_182560 | FLJ25773  | -3.64 | NM_033405 | PRIC285       | -3.63 |
| NM_005151 | USP14     | -3.63 | NM_015560 | OPA1          | -3.63 |
| NM_002265 | KPNB1     | -3.63 | NM_004371 | COPA          | -3.63 |
| NM_032023 | RASSF4    | -3.63 | NM_021192 | HOXD11        | -3.62 |
| NM_005650 | TCF20     | -3.62 | NM_001437 | ESR2          | -3.62 |
| NM_005131 | THOC1     | -3.61 | NM_000661 | RPL9          | -3.61 |
| NM_020382 | SET8      | -3.6  | XM_373313 | OR1J5         | -3.59 |
| NM_000973 | RPL8      | -3.59 | NM_015023 | WDTC1         | -3.59 |
| NM_004445 | EPHB6     | -3.58 | NM_006068 | TLR6          | -3.54 |
| NM_003465 | CHIT1     | -3.54 | NM_003380 | VIM           | -3.54 |
| NM_005206 | CRK       | -3.52 | NM_021126 | MPST          | -3.52 |
| NM_000976 | RPL12     | -3.52 | NM_018079 | FLJ10379      | -3.52 |
| NM_018394 | FLJ11342  | -3.52 | XM_370865 | LOC388122     | -3.52 |
| XM_370910 | LOC388181 | -3.52 | NM_001007 | RPS4X         | -3.5  |
| NM_017824 | 38412     | -3.5  | NM_001568 | EIF3S6        | -3.49 |
| NM_002594 | PCSK2     | -3.49 | NM_002066 | GML           | -3.48 |
| NM_000997 | RPL37     | -3.48 | NM_004551 | NDUFS3        | -3.48 |
| NM_000967 | RPL3      | -3.48 | NM_004422 | DVL2          | -3.47 |
| NM_002382 | MAX       | -3.46 | NM_001022 | RPS19         | -3.46 |
| NM_016204 | GDF2      | -3.44 | NM_198488 | FLJ46072      | -3.44 |
| NM_006469 | IVNS1ABP  | -3.43 | NM_020382 | SET8          | -3.43 |
| NM_000986 | RPL24     | -3.43 | NM_014691 | AQR           | -3.43 |
| NM_017842 | FLJ20489  | -3.43 | NM_032134 | DKFZP434P0316 | -3.43 |
| NM_002467 | MYC       | -3.42 | NM_016041 | F-LANA        | -3.42 |
| NM_002916 | RFC4      | -3.41 | NM_005954 | MT3           | -3.41 |
| NM_130807 | MOBK2A    | -3.41 | XM_378219 | LOC399737     | -3.41 |

|           |           |       |              |           |       |
|-----------|-----------|-------|--------------|-----------|-------|
| NM_012160 | FBXL4     | -3.39 | NM_004953    | EIF4G1    | -3.39 |
| NM_014886 | TINP1     | -3.38 | XM_373246    | LOC392208 | -3.38 |
| NM_001776 | ENTPD1    | -3.37 | NM_004076    | CRYBB3    | -3.37 |
| NM_152373 | MGC27466  | -3.37 | NM_014275    | MGAT4B    | -3.36 |
| NM_016376 | ANKFY1    | -3.36 | XM_045911    | STXBP5L   | -3.35 |
| NM_003920 | TIMELESS  | -3.34 | NM_016476    | ANAPC11   | -3.34 |
| NM_018124 | RFWD3     | -3.34 | NM_016388    | TRIM      | -3.33 |
| NM_007111 | TFDP1     | -3.33 | NM_004822    | NTN1      | -3.33 |
| NM_001415 | EIF2S3    | -3.33 | NM_001032    | RPS29     | -3.32 |
| NM_002807 | PSMD1     | -3.32 | NM_005066    | SFPQ      | -3.31 |
| NM_016451 | COPB      | -3.3  | NM_017768    | FLJ20331  | -3.29 |
| NM_024640 | FLJ23476  | -3.29 | NM_001005853 | OR6B2     | -3.29 |
| NM_002011 | FGFR4     | -3.28 | NM_147191    | MMP21     | -3.28 |
| NM_152832 | MTVR1     | -3.28 | NM_002358    | MAD2L1    | -3.28 |
| NM_001013 | RPS9      | -3.28 | NM_002987    | CCL17     | -3.27 |
| NM_013277 | RACGAP1   | -3.27 | NM_032444    | BTBD12    | -3.27 |
| XM_065899 | LOC130773 | -3.27 | NM_016633    | ERAF      | -3.26 |
| XM_291729 | TAF3      | -3.26 | NM_002226    | JAG2      | -3.25 |
| NM_052865 | C20ORF72  | -3.25 | NM_152658    | THAP8     | -3.25 |
| NM_001686 | ATP5B     | -3.23 | NM_002788    | PSMA3     | -3.23 |
| XM_378701 | LOC146795 | -3.23 | NM_198543    | MGC35434  | -3.23 |
| XM_376420 | LOC401206 | -3.23 | NM_015062    | PPRC1     | -3.22 |
| NM_144987 | U2AF1L3   | -3.22 | NM_000971    | RPL7      | -3.21 |
| NM_032786 | FLJ14451  | -3.21 | NM_194284    | CLDN23    | -3.21 |
| XM_371758 | LOC389308 | -3.21 | NM_002357    | MAD       | -3.2  |
| NM_000493 | COL10A1   | -3.19 | XM_291204    | LOC340228 | -3.19 |
| NM_019059 | TOMM7     | -3.18 | NM_144974    | FLJ31846  | -3.18 |
| NM_006562 | LBX1      | -3.17 | NM_012452    | TNFRSF13B | -3.17 |
| NM_002940 | ABCE1     | -3.17 | NM_000977    | RPL13     | -3.17 |
| NM_153324 | DEFB123   | -3.16 | NM_001020    | RPS16     | -3.15 |
| XM_293352 | LOC347438 | -3.15 | NM_021620    | PRDM13    | -3.14 |
| NM_016218 | POLK      | -3.14 | NM_020175    | LOC56931  | -3.14 |
| XM_291095 | LOC339970 | -3.14 | NM_013943    | CLIC4     | -3.13 |
| NM_014089 | NUPL1     | -3.13 | XM_057296    | LOC116064 | -3.13 |
| NM_001395 | DUSP9     | -3.12 | NM_001517    | GTF2H4    | -3.12 |
| NM_000993 | RPL31     | -3.12 | NM_003757    | EIF3S2    | -3.11 |
| NM_003752 | EIF3S8    | -3.11 | NM_005146    | SART1     | -3.11 |
| NM_032186 | KIAA1221  | -3.11 | NM_001001414 | LOC342897 | -3.11 |
| XM_373949 | LOC388885 | -3.11 | NM_006105    | RAPGEF3   | -3.1  |
| NM_016601 | KCNK9     | -3.1  | NM_016202    | ZNF580    | -3.1  |
| NM_020701 | KIAA1160  | -3.1  | NM_024790    | FLJ22490  | -3.1  |
| XM_041221 | LOC153027 | -3.1  | NM_173695    | FLJ36601  | -3.09 |
| XM_050625 | SFRP2     | -3.08 | NM_024943    | FLJ23235  | -3.08 |
| NM_203402 | LOC161247 | -3.07 | NM_001680    | FXD2      | -3.06 |
| NM_003378 | VGFB      | -3.06 | NM_024859    | FLJ21687  | -3.06 |
| NM_139242 | MTFMT     | -3.06 | XM_058332    | LOC118670 | -3.06 |

|           |               |       |              |           |       |
|-----------|---------------|-------|--------------|-----------|-------|
| NM_007262 | PARK7         | -3.04 | NM_014663    | JMJD2A    | -3.04 |
| NM_012104 | BACE1         | -3.04 | NM_138780    | SYTL5     | -3.04 |
| NM_138451 | LOC115811     | -3.04 | NM_001511    | CXCL1     | -3.03 |
| NM_130467 | PAGE-5        | -3.03 | XM_379159    | LOC151484 | -3.03 |
| XM_378542 | LOC283761     | -3.03 | NM_007279    | U2AF2     | -3.02 |
| NM_014597 | ERBP          | -3.02 | NM_080722    | ADAMTS14  | -3.01 |
| NM_007273 | REA           | -3.01 | NM_020809    | ARHGAP20  | -3.01 |
| NM_006143 | GPR19         | -3    | NM_001005504 | OR4F21    | -3    |
| NM_018197 | ZFP64         | -2.99 | NM_001273    | CHD4      | -2.99 |
| NM_147180 | PPP3R2        | -2.99 | NM_015245    | ANKS1     | -2.99 |
| NM_014960 | KIAA1001      | -2.99 | NM_016047    | P14       | -2.99 |
| XM_104657 | LOC164714     | -2.99 | NM_005926    | MFAP1     | -2.98 |
| NM_015459 | DKFZP564J0863 | -2.98 | NM_018040    | GPATC2    | -2.98 |
| NM_025138 | C13ORF23      | -2.98 | NM_018406    | MUC4      | -2.97 |
| NM_033255 | EPST11        | -2.97 | NM_015443    | LOC284058 | -2.97 |
| NM_002796 | PSMB4         | -2.96 | NM_004708    | PDCD5     | -2.96 |
| NM_001088 | AANAT         | -2.96 | NM_002694    | POLR2C    | -2.96 |
| XM_035527 | FLJ10980      | -2.96 | XM_377926    | LOC402245 | -2.96 |
| NM_003870 | IQGAP1        | -2.95 | NM_000996    | RPL35A    | -2.95 |
| NM_021915 | ZNF69         | -2.95 | NM_018942    | HMX1      | -2.94 |
| XM_371210 | TAS1R3        | -2.94 | NM_006150    | LMO6      | -2.93 |
| NM_024604 | FLJ21908      | -2.93 | XM_212162    | LOC286080 | -2.93 |
| NM_021953 | FOXN1         | -2.92 | NM_006666    | RUVBL2    | -2.92 |
| NM_002309 | LIF           | -2.92 | NM_001634    | AMD1      | -2.92 |
| NM_152232 | TAS1R2        | -2.91 | NM_003872    | NRP2      | -2.91 |
| NM_003986 | BBOX1         | -2.91 | NM_014918    | CHSY1     | -2.91 |
| NM_031213 | C19ORF27      | -2.91 | NM_173645    | FLJ37357  | -2.91 |
| XM_375261 | LOC400452     | -2.91 | NM_005607    | PTK2      | -2.9  |
| NM_004631 | LRP8          | -2.9  | NM_207311    | LOC92558  | -2.9  |
| NM_181621 | KRTAP13-2     | -2.9  | NM_004490    | GRB14     | -2.89 |
| NM_000281 | PCBD          | -2.89 | NM_001031    | RPS28     | -2.89 |
| NM_013453 | SPANXA1       | -2.89 | NM_020129    | LGALS14   | -2.89 |
| NM_000160 | GCGR          | -2.88 | NM_004657    | SDPR      | -2.88 |
| NM_000947 | PRIM2A        | -2.88 | NM_001378    | DNCI2     | -2.88 |
| NM_000979 | RPL18         | -2.88 | NM_144976    | ZNF564    | -2.88 |
| NM_178499 | MGC39827      | -2.88 | XM_370684    | LOC387845 | -2.88 |
| NM_144667 | FLJ32894      | -2.87 | XM_375654    | FLJ35258  | -2.87 |
| NM_033387 | C9ORF59       | -2.87 | NM_014301    | ISCU      | -2.86 |
| NM_145045 | MGC20983      | -2.86 | NM_004843    | IL27RA    | -2.85 |
| NM_005582 | LY64          | -2.85 | NM_032758    | PHF5A     | -2.85 |
| NM_201401 | FLJ26056      | -2.85 | NM_002798    | PSMB6     | -2.84 |
| NM_006082 | K-ALPHA-1     | -2.84 | XM_376365    | LOC116349 | -2.84 |
| NM_000274 | OAT           | -2.83 | NM_024302    | MMP28     | -2.83 |
| NM_001523 | HAS1          | -2.83 | NM_017438    | C21ORF18  | -2.83 |
| NM_022819 | PLA2G2F       | -2.83 | XM_371222    | LOC388595 | -2.83 |
| XM_374179 | LOC389422     | -2.83 | NM_013328    | PYCR2     | -2.82 |

|              |               |       |           |           |       |
|--------------|---------------|-------|-----------|-----------|-------|
| NM_001001415 | ZNF429        | -2.82 | NM_012152 | EDG7      | -2.81 |
| NM_002815    | PSMD11        | -2.81 | NM_016001 | CGI-48    | -2.81 |
| XM_378199    | FLJ10232      | -2.81 | NM_001821 | CHML      | -2.8  |
| NM_000987    | RPL26         | -2.8  | NM_012426 | SF3B3     | -2.8  |
| NM_152506    | C21ORF129     | -2.8  | NM_174977 | SEC14L4   | -2.8  |
| NM_016290    | RAP80         | -2.79 | NM_016541 | GNG13     | -2.79 |
| NM_018933    | PCDHB13       | -2.79 | NM_000990 | RPL27A    | -2.78 |
| NM_015412    | DKFZP434F2021 | -2.78 | NM_032352 | BRMS1L    | -2.78 |
| NM_052946    | NOSTRIN       | -2.78 | NM_006827 | TMP21     | -2.77 |
| NM_003858    | CCNK          | -2.77 | NM_022567 | NYX       | -2.77 |
| NM_022737    | LPPR2         | -2.77 | NM_006210 | PEG3      | -2.77 |
| XM_374987    | LOC400055     | -2.77 | NM_004358 | CDC25B    | -2.76 |
| NM_017857    | SSH3          | -2.76 | XM_291345 | KIAA0522  | -2.76 |
| NM_178449    | TIP39         | -2.76 | XM_114152 | LOC200205 | -2.76 |
| NM_020718    | USP31         | -2.75 | NM_001255 | CDC20     | -2.75 |
| NM_001760    | CCND3         | -2.75 | NM_002789 | PSMA4     | -2.75 |
| NM_032837    | FLJ14775      | -2.75 | XM_039218 | LOC91561  | -2.75 |
| NM_014911    | AAK1          | -2.74 | NM_006098 | GNB2L1    | -2.74 |
| XM_376720    | KIAA0543      | -2.74 | XM_372884 | CECR2     | -2.74 |
| XM_085833    | LOC147646     | -2.74 | NM_152553 | IBRDC1    | -2.74 |
| NM_005916    | MCM7          | -2.73 | NM_004335 | BST2      | -2.73 |
| NM_198468    | C6ORF167      | -2.73 | XM_370995 | SNAI3     | -2.73 |
| XM_372926    | LOC391370     | -2.73 | NM_000945 | PPP3R1    | -2.72 |
| NM_004730    | ETF1          | -2.72 | NM_000970 | RPL6      | -2.72 |
| NM_022090    | LOC63920      | -2.72 | NM_000359 | TGM1      | -2.71 |
| NM_012115    | CASP8AP2      | -2.71 | NM_001114 | ADCY7     | -2.71 |
| NM_001003    | RPLP1         | -2.71 | NM_173532 | FLJ35838  | -2.71 |
| XM_095122    | LOC168474     | -2.71 | NM_198822 | ATP5L2    | -2.71 |
| NM_182702    | TESSP2        | -2.71 | XM_370723 | LOC387922 | -2.71 |
| XM_378693    | LOC400614     | -2.71 | XM_377041 | LOC401618 | -2.71 |
| NM_001005489 | OR5B17        | -2.71 | NM_004472 | FOXD1     | -2.7  |
| NM_003195    | TCEA2         | -2.7  | NM_002522 | NPTX1     | -2.7  |
| NM_000995    | RPL34         | -2.7  | XM_290345 | LOC339799 | -2.7  |
| XM_380042    | LOC402694     | -2.7  | XM_376869 | LOC401525 | -2.7  |
| NM_031966    | CCNB1         | -2.69 | NM_022352 | CARD9     | -2.69 |
| NM_022074    | FLJ22794      | -2.69 | XM_042936 | GRIP2     | -2.69 |
| NM_052849    | MGC20481      | -2.69 | NM_138457 | FOXP4     | -2.69 |
| NM_138338    | POLR3H        | -2.69 | NM_133259 | LRPPRC    | -2.68 |
| NM_002561    | P2RX5         | -2.68 | NM_012223 | MYO1B     | -2.68 |
| NM_003091    | SNRPB         | -2.67 | NM_024322 | MGC11266  | -2.67 |
| XM_051221    | SKIP          | -2.67 | XM_372803 | LOC391130 | -2.67 |
| XM_379877    | LOC402556     | -2.67 | NM_002092 | GRSF1     | -2.66 |
| NM_003302    | TRIP6         | -2.66 | NM_007071 | HHLA3     | -2.66 |
| NM_032314    | MGC4767       | -2.66 | NM_005248 | FGR       | -2.65 |
| NM_005153    | USP10         | -2.65 | NM_003547 | HIST1H4G  | -2.65 |
| NM_016304    | C15ORF15      | -2.65 | NM_004815 | PARG1     | -2.64 |

|              |            |       |              |           |       |
|--------------|------------|-------|--------------|-----------|-------|
| NM_022752    | ZNF574     | -2.64 | NM_030786    | SYNCOILIN | -2.64 |
| XM_372039    | LOC389651  | -2.64 | XM_374339    | LOC389896 | -2.64 |
| NM_001005521 | C21ORF37   | -2.64 | NM_058229    | FBXO32    | -2.63 |
| NM_004270    | CRSP9      | -2.63 | NM_002795    | PSMB3     | -2.63 |
| NM_000968    | RPL4       | -2.63 | NM_183375    | ESSPL     | -2.63 |
| NM_012321    | LSM4       | -2.62 | XM_378705    | LOC400620 | -2.62 |
| NM_006260    | DNAJC3     | -2.61 | XM_048104    | FLG       | -2.61 |
| NM_006932    | SMTN       | -2.61 | NM_003750    | EIF3S10   | -2.61 |
| NM_000985    | RPL17      | -2.61 | NM_000988    | RPL27     | -2.61 |
| NM_022086    | ELMO2      | -2.61 | NM_000224    | KRT18     | -2.6  |
| NM_024813    | FLJ13150   | -2.6  | NM_032595    | PPP1R9B   | -2.59 |
| NM_000046    | ARSB       | -2.59 | NM_001249    | ENTPD5    | -2.59 |
| NM_014293    | NPTXR      | -2.59 | NM_007341    | SH3BGR    | -2.59 |
| NM_014904    | RAB11-FIP2 | -2.59 | NM_018085    | IPO9      | -2.59 |
| NM_182532    | LOC199964  | -2.59 | NM_182554    | C10ORF53  | -2.59 |
| NM_024647    | NUP43      | -2.59 | NM_000569    | FCGR3A    | -2.58 |
| NM_003457    | ZNF207     | -2.58 | NM_001003938 | HBM       | -2.58 |
| NM_002810    | PSMD4      | -2.57 | NM_004772    | C5ORF13   | -2.57 |
| NM_014481    | APEX2      | -2.57 | NM_018988    | GFOD1     | -2.57 |
| NM_207438    | FLJ43808   | -2.57 | NM_002486    | NCBP1     | -2.56 |
| NM_007374    | SIX6       | -2.56 | NM_024292    | UBL5      | -2.56 |
| NM_000131    | F7         | -2.56 | NM_014014    | U5-200KD  | -2.56 |
| NM_002816    | PSMD12     | -2.56 | NM_014143    | PDCD1LG1  | -2.56 |
| NM_032026    | TATDN1     | -2.56 | NM_058189    | C21ORF69  | -2.56 |
| NM_152518    | FLJ38359   | -2.56 | NM_178429    | LEP11     | -2.56 |
| XM_378412    | LOC400125  | -2.56 | NM_213655    | HSN2      | -2.56 |
| NM_007170    | TESK2      | -2.55 | NM_001507    | MLNR      | -2.55 |
| NM_004941    | DHX8       | -2.55 | NM_013396    | USP25     | -2.55 |
| NM_007346    | OGFR       | -2.55 | NM_153363    | MGC42415  | -2.55 |
| NM_007223    | GPR        | -2.54 | XM_050278    | KIF26A    | -2.54 |
| NM_001194    | HCN2       | -2.54 | NM_000989    | RPL30     | -2.54 |
| NM_020196    | XAB2       | -2.54 | NM_021177    | LSM2      | -2.54 |
| NM_032133    | MYCBPAP    | -2.54 | NM_152324    | MGC35169  | -2.54 |
| NM_182535    | LOC200261  | -2.54 | XM_379987    | LOC402634 | -2.54 |
| NM_002082    | GRK6       | -2.53 | NM_016337    | EVL       | -2.53 |
| NM_018663    | PXMP2      | -2.53 | NM_013304    | ZDHHC1    | -2.53 |
| NM_004090    | DUSP3      | -2.52 | NM_001287    | CLCN7     | -2.52 |
| NM_000136    | FANCC      | -2.52 | NM_000980    | RPL18A    | -2.52 |
| NM_145308    | LOC220070  | -2.52 | NM_003114    | SPAG1     | -2.51 |
| NM_007130    | ZNF41      | -2.51 | NM_144691    | CAPN12    | -2.51 |
| NM_181619    | KRTAP21-1  | -2.51 | NM_182972    | IRF2BP2   | -2.51 |
| NM_001043    | SLC6A2     | -2.5  | NM_020226    | PRDM8     | -2.5  |
| NM_001089    | ABCA3      | -2.5  | NM_000984    | RPL23A    | -2.5  |
| NM_006598    | SLC12A7    | -2.5  | NM_014333    | IGSF4     | -2.5  |
| NM_053044    | HTRA3      | -2.5  | XM_209941    | C9ORF117  | -2.5  |
| XM_372749    | LOC390975  | -2.5  | XM_379855    | LOC402530 | -2.5  |

|              |            |       |           |           |       |
|--------------|------------|-------|-----------|-----------|-------|
| NM_020370    | GPR84      | -2.49 | NM_030905 | OR2J2     | -2.49 |
| NM_003880    | WISP3      | -2.49 | NM_021955 | GNGT1     | -2.49 |
| NM_002809    | PSMD3      | -2.49 | NM_145253 | LOC124402 | -2.49 |
| NM_130776    | GAGED4     | -2.49 | NM_000981 | RPL19     | -2.48 |
| NM_014050    | MRPL42     | -2.48 | NM_014138 | TMEM29    | -2.48 |
| NM_017563    | IL17RD     | -2.48 | NM_017509 | KLK15     | -2.48 |
| NM_022780    | FLJ13910   | -2.48 | NM_152358 | MGC33947  | -2.48 |
| NM_207353    | LOC286480  | -2.48 | XM_048462 | RUSC2     | -2.47 |
| NM_031894    | FTHL17     | -2.47 | NM_018469 | HT008     | -2.47 |
| XM_379073    | LOC386597  | -2.47 | XM_376554 | LOC401285 | -2.47 |
| NM_004597    | SNRPD2     | -2.46 | NM_020131 | C1ORF6    | -2.46 |
| NM_139126    | PPIL4      | -2.46 | NM_002111 | HD        | -2.45 |
| NM_015934    | NOP5/NOP58 | -2.45 | NM_145172 | NYD-SP29  | -2.45 |
| NM_002091    | GRP        | -2.44 | NM_018089 | FLJ10415  | -2.44 |
| NM_152586    | USP54      | -2.44 | XM_372160 | LOC389814 | -2.44 |
| NM_015112    | MAST2      | -2.43 | NM_021232 | PRODH2    | -2.43 |
| NM_000631    | NCF4       | -2.43 | NM_012465 | TLL2      | -2.43 |
| XM_029101    | KIAA0947   | -2.43 | NM_017793 | RPP25     | -2.43 |
| NM_024109    | MGC2654    | -2.43 | NM_032582 | USP32     | -2.43 |
| XM_374138    | LOC389329  | -2.43 | XM_371204 | LOC388574 | -2.43 |
| NM_005274    | GNG5       | -2.42 | NM_001608 | ACADL     | -2.42 |
| NM_133639    | RHOV       | -2.42 | NM_003818 | CDS2      | -2.42 |
| NM_153247    | SLC29A4    | -2.42 | NM_001716 | BLR1      | -2.41 |
| NM_003941    | WASL       | -2.41 | NM_014569 | ZFP95     | -2.41 |
| NM_022462    | HIF3A      | -2.41 | NM_021228 | SR-A1     | -2.41 |
| NM_144658    | DOCK11     | -2.41 | NM_152899 | IL4I1     | -2.41 |
| NM_000024    | ADRB2      | -2.4  | NM_000028 | AGL       | -2.4  |
| XM_371573    | NXPH2      | -2.4  | NM_024097 | MGC955    | -2.4  |
| NM_024675    | FLJ21816   | -2.4  | NM_144631 | ZNF513    | -2.4  |
| XM_373004    | LOC391594  | -2.4  | NM_001619 | ADRBK1    | -2.39 |
| NM_000168    | GLI3       | -2.39 | NM_020979 | APS       | -2.39 |
| NM_001002    | RPLP0      | -2.39 | NM_014347 | ZNF324    | -2.39 |
| NM_018082    | POLR3B     | -2.39 | NM_022119 | PRSS22    | -2.39 |
| NM_181604    | KRTAP6-2   | -2.39 | XM_374279 | LOC389685 | -2.39 |
| XM_293449    | LOC389915  | -2.39 | NM_004759 | MAPKAPK2  | -2.38 |
| NM_001934    | DLX4       | -2.38 | NM_000999 | RPL38     | -2.38 |
| NM_004809    | STOML1     | -2.38 | NM_024804 | FLJ12606  | -2.38 |
| NM_025234    | REC14      | -2.38 | XM_376679 | FLJ25778  | -2.38 |
| NM_005105    | RBM8A      | -2.37 | NM_024111 | MGC4504   | -2.37 |
| XM_378340    | LOC400004  | -2.37 | NM_001892 | CSNK1A1   | -2.36 |
| NM_007191    | WIF1       | -2.36 | NM_017655 | GIPC2     | -2.36 |
| NM_004254    | SLC22A8    | -2.36 | NM_004213 | SLC28A1   | -2.36 |
| NM_005822    | DSCR1L1    | -2.36 | NM_147128 | ZNRF2     | -2.36 |
| XM_291671    | RBM20      | -2.36 | XM_371936 | LOC389538 | -2.36 |
| NM_001004053 | ACTBL1     | -2.36 | NM_213606 | LOC387700 | -2.36 |
| NM_001005501 | OR4K2      | -2.36 | NM_017886 | FLJ20574  | -2.35 |



|              |           |       |           |           |       |
|--------------|-----------|-------|-----------|-----------|-------|
| NM_000609    | CXCL12    | -2.35 | NM_001206 | BTEB1     | -2.35 |
| NM_006065    | SIRPB1    | -2.35 | NM_020210 | SEMA4B    | -2.35 |
| NM_031273    | TEX13B    | -2.35 | NM_031954 | KCTD10    | -2.35 |
| XM_375000    | KIAA1853  | -2.35 | XM_379717 | LOC401607 | -2.35 |
| NM_004547    | NDUFB4    | -2.35 | NM_001498 | GCLC      | -2.34 |
| NM_015442    | CNOT10    | -2.34 | NM_019057 | FLJ10404  | -2.34 |
| NM_022452    | FBS1      | -2.34 | NM_031452 | C6ORF119  | -2.34 |
| NM_000141    | FGFR2     | -2.33 | XM_290796 | KIAA1361  | -2.33 |
| NM_004516    | ILF3      | -2.33 | NM_001488 | TADA2L    | -2.33 |
| NM_002395    | ME1       | -2.33 | NM_000948 | PRL       | -2.33 |
| NM_002676    | PMM1      | -2.33 | NM_000982 | RPL21     | -2.33 |
| NM_080723    | VMP       | -2.33 | NM_139278 | LGI3      | -2.33 |
| XM_291974    | LOC338750 | -2.33 | XM_372768 | LOC391012 | -2.33 |
| XM_371677    | LOC389173 | -2.33 | NM_004299 | ABCB7     | -2.32 |
| NM_006230    | POLD2     | -2.32 | XM_059729 | IRAK1BP1  | -2.32 |
| NM_182556    | LOC283130 | -2.32 | XM_372535 | LOC390508 | -2.32 |
| XM_372562    | LOC390564 | -2.32 | NM_013314 | BLNK      | -2.31 |
| NM_002068    | GNA15     | -2.31 | NM_003751 | EIF3S9    | -2.31 |
| NM_024123    | LY6G6E    | -2.31 | NM_153236 | HIAN7     | -2.31 |
| NM_182487    | OLFML2A   | -2.31 | XM_372448 | LOC390284 | -2.31 |
| NM_006335    | TIMM17A   | -2.3  | NM_021149 | COTL1     | -2.3  |
| NM_018193    | FLJ10719  | -2.3  | NM_021135 | RPS6KA2   | -2.29 |
| NM_001001716 | NFKBIB    | -2.29 | NM_012108 | BRDG1     | -2.29 |
| NM_130786    | A1BG      | -2.29 | NM_005672 | PSCA      | -2.29 |
| XM_376830    | KIAA0258  | -2.29 | NM_016016 | CGI-69    | -2.29 |
| NM_020414    | DDX24     | -2.29 | NM_152737 | MGC33993  | -2.29 |
| XM_172230    | LOC257039 | -2.29 | NM_003301 | TRHR      | -2.28 |
| NM_018249    | CDK5RAP2  | -2.28 | NM_015040 | PIP5K3    | -2.28 |
| NM_003840    | TNFRSF10D | -2.28 | NM_003353 | UCN       | -2.28 |
| NM_001683    | ATP2B2    | -2.28 | NM_018097 | FLJ10460  | -2.28 |
| NM_023013    | LOC65121  | -2.28 | NM_145309 | LOC220074 | -2.28 |
| NM_152748    | FLJ31340  | -2.28 | NM_007160 | OR2H3     | -2.27 |
| NM_020761    | Raptor    | -2.27 | NM_007080 | LSM6      | -2.27 |
| NM_016480    | PAIP2     | -2.27 | NM_153350 | FBXL16    | -2.27 |
| XM_377818    | LOC402148 | -2.27 | NM_001280 | CIRBP     | -2.26 |
| NM_007294    | BRCA1     | -2.26 | NM_003945 | ATP6V0E   | -2.26 |
| NM_016284    | KIAA1007  | -2.26 | NM_014286 | FREQ      | -2.26 |
| NM_203458    | N2N       | -2.26 | XM_373099 | LOC391847 | -2.26 |
| XM_379839    | LOC402508 | -2.26 | NM_005765 | ATP6AP2   | -2.25 |
| NM_032511    | C6ORF168  | -2.25 | NM_175892 | FLJ37266  | -2.25 |
| NM_018953    | HOXC5     | -2.24 | NM_016213 | TRIP4     | -2.24 |
| NM_017668    | NDE1      | -2.24 | NM_014482 | BMP10     | -2.24 |
| NM_032370    | MGC15716  | -2.24 | NM_032761 | MGC16075  | -2.24 |
| XM_116936    | LOC196541 | -2.24 | NM_003508 | FZD9      | -2.23 |
| NM_000428    | LTBP2     | -2.23 | NM_006086 | TUBB4     | -2.23 |
| NM_002481    | PPP1R12B  | -2.23 | NM_182710 | HTATIP    | -2.23 |

|              |               |       |           |           |       |
|--------------|---------------|-------|-----------|-----------|-------|
| NM_000803    | FOLR2         | -2.23 | NM_002793 | PSMB1     | -2.23 |
| NM_017929    | PEX26         | -2.23 | NM_024721 | ZFH4      | -2.23 |
| NM_031934    | RAB34         | -2.23 | NM_178125 | TRIM50A   | -2.23 |
| XM_378517    | MGC15885      | -2.23 | XM_375308 | LOC400509 | -2.23 |
| NM_000024    | ADRB2         | -2.22 | NM_006773 | DDX18     | -2.22 |
| NM_021002    | IFNA6         | -2.22 | NM_006076 | HRBL      | -2.22 |
| NM_197964    | HSPC268       | -2.22 | NM_198504 | PAQR9     | -2.22 |
| XM_371778    | LOC389341     | -2.22 | NM_005823 | MSLN      | -2.21 |
| NM_004127    | GPS1          | -2.21 | NM_000854 | GSTT2     | -2.21 |
| NM_002033    | FUT4          | -2.21 | NM_022551 | RPS18     | -2.21 |
| NM_032379    | SYTL2         | -2.21 | NM_052864 | T2BP      | -2.21 |
| NM_144711    | MGC22679      | -2.21 | NM_002044 | GALK2     | -2.2  |
| NM_021074    | NDUFV2        | -2.2  | NM_014444 | 76P       | -2.2  |
| NM_021943    | TEX27         | -2.2  | NM_153603 | COG7      | -2.2  |
| XM_380012    | LOC402670     | -2.2  | NM_012127 | CIZ1      | -2.19 |
| NM_030936    | RNF32         | -2.19 | NM_020070 | IGLL1     | -2.19 |
| NM_016593    | CYP39A1       | -2.19 | XM_016113 | LOC158104 | -2.19 |
| XM_377885    | LOC402208     | -2.19 | NM_004817 | TJP2      | -2.18 |
| NM_000576    | IL1B          | -2.18 | NM_016536 | ZNF571    | -2.18 |
| NM_015980    | HMP19         | -2.18 | NM_022072 | FLJ22609  | -2.18 |
| NM_198563    | MGC52022      | -2.18 | XM_378553 | LOC400475 | -2.18 |
| NM_017986    | FLJ10060      | -2.17 | NM_003608 | GPR65     | -2.17 |
| NM_012369    | OR2F1         | -2.17 | NM_020137 | GRIPAP1   | -2.17 |
| NM_005244    | EYA2          | -2.17 | NM_015904 | EIF5B     | -2.17 |
| NM_020904    | PLEKHA4       | -2.17 | XM_378390 | LOC144678 | -2.17 |
| XM_373539    | LOC387871     | -2.17 | NM_016059 | PPIL1     | -2.16 |
| NM_004435    | ENDOG         | -2.16 | NM_006444 | SMC2L1    | -2.16 |
| NM_015004    | EXOSC7        | -2.16 | NM_002139 | RBMX      | -2.16 |
| NM_016472    | C14ORF129     | -2.16 | NM_025072 | PTGES2    | -2.16 |
| NM_194282    | DKFZP686L1814 | -2.16 | NM_207472 | FLJ46020  | -2.16 |
| XM_292029    | LOC341371     | -2.16 | XM_379317 | LOC401175 | -2.16 |
| XM_378239    | LOC399789     | -2.16 | NM_012146 | DUX1      | -2.15 |
| NM_002466    | MYBL2         | -2.15 | NM_021198 | CTDSP1    | -2.15 |
| NM_020799    | AMSH-LP       | -2.15 | NM_004691 | ATP6V0D1  | -2.15 |
| NM_015864    | C6ORF32       | -2.15 | NM_014023 | WDR37     | -2.15 |
| NM_206909    | EFA6R         | -2.15 | NM_002689 | POLA2     | -2.15 |
| NM_013234    | EIF3K         | -2.15 | NM_016132 | MYEF2     | -2.15 |
| NM_030782    | CRR9          | -2.15 | XM_293886 | LOC345576 | -2.15 |
| NM_001002036 | ASTL          | -2.15 | NM_002982 | CCL2      | -2.14 |
| NM_018314    | UEV3          | -2.14 | NM_152291 | MUC7      | -2.14 |
| NM_005088    | DXYS155E      | -2.14 | NM_012121 | CDC42EP4  | -2.14 |
| NM_024048    | MGC3020       | -2.14 | NM_024085 | FLJ22169  | -2.14 |
| NM_173525    | MGC34805      | -2.14 | NM_153032 | FLJ32065  | -2.14 |
| NM_173586    | MGC34821      | -2.14 | NM_181538 | GJE1      | -2.14 |
| NM_003088    | FSCN1         | -2.13 | NM_001011 | RPS7      | -2.13 |
| NM_016652    | CRNKL1        | -2.13 | NM_032478 | MRPL38    | -2.13 |

|           |               |       |           |           |       |
|-----------|---------------|-------|-----------|-----------|-------|
| NM_032892 | MGC14161      | -2.13 | NM_173605 | KCNRG     | -2.13 |
| NM_002766 | PRPSAP1       | -2.12 | NM_006662 | SRCAP     | -2.12 |
| XM_071866 | CDR2          | -2.12 | NM_012408 | PRKCBP1   | -2.12 |
| NM_002805 | PSMC5         | -2.12 | NM_016605 | C5ORF6    | -2.12 |
| NM_032303 | C9ORF99       | -2.12 | NM_138796 | LOC128153 | -2.12 |
| XM_292957 | LOC344165     | -2.12 | NM_000124 | ERCC6     | -2.11 |
| NM_014737 | RASSF2        | -2.11 | NM_007000 | UPK1A     | -2.11 |
| NM_007256 | SLCO2B1       | -2.11 | NM_015138 | KIAA0252  | -2.11 |
| NM_012269 | HYAL4         | -2.11 | NM_018101 | CDCA8     | -2.11 |
| NM_020927 | KIAA1576      | -2.11 | NM_020905 | RDH14     | -2.11 |
| NM_024610 | HSPBAP1       | -2.11 | NM_032634 | PIGO      | -2.11 |
| XM_043492 | KIAA1728      | -2.11 | XM_379632 | LOC158376 | -2.11 |
| XM_372092 | LOC389727     | -2.11 | XM_374338 | LOC389893 | -2.11 |
| NM_005480 | TROAP         | -2.1  | NM_004404 | NEDD5     | -2.1  |
| NM_006427 | SIVA          | -2.1  | NM_000836 | GRIN2D    | -2.1  |
| NM_000272 | NPHP1         | -2.1  | NM_005195 | CEBPD     | -2.1  |
| NM_002631 | PGD           | -2.1  | NM_002806 | PSMC6     | -2.1  |
| NM_031920 | ARG99         | -2.1  | XM_086894 | LOC150297 | -2.1  |
| NM_207329 | MYADML        | -2.1  | NM_173562 | C6ORF69   | -2.1  |
| NM_199285 | MGC70924      | -2.1  | NM_020529 | NFKBIA    | -2.09 |
| NM_003498 | SNN           | -2.09 | NM_001695 | ATP6V1C1  | -2.09 |
| NM_004053 | BYSL          | -2.09 | NM_033102 | PROSTEIN  | -2.09 |
| XM_378825 | LOC400730     | -2.09 | NM_003559 | PIP5K2B   | -2.08 |
| NM_003913 | PRPF4B        | -2.08 | NM_003011 | SET       | -2.08 |
| NM_004165 | RRAD          | -2.08 | NM_001353 | AKR1C1    | -2.08 |
| NM_002669 | PLRG1         | -2.08 | NM_014517 | UBP1      | -2.08 |
| NM_015235 | CSTF2T        | -2.08 | NM_024688 | C10ORF68  | -2.08 |
| NM_182756 | SPY1          | -2.08 | NM_001619 | ADRBK1    | -2.07 |
| NM_007186 | CEP2          | -2.07 | NM_020672 | S100A14   | -2.07 |
| NM_001902 | CTH           | -2.07 | NM_004623 | TTC4      | -2.07 |
| NM_007272 | CTRC          | -2.07 | NM_024954 | UBTD1     | -2.07 |
| NM_080616 | C20ORF112     | -2.07 | NM_182517 | MGC52423  | -2.07 |
| XM_211090 | LOC283587     | -2.07 | XM_375670 | LOC400726 | -2.07 |
| NM_000686 | AGTR2         | -2.06 | NM_004417 | DUSP1     | -2.06 |
| NM_003933 | BAIAP3        | -2.06 | NM_006802 | SF3A3     | -2.06 |
| NM_012470 | TNPO3         | -2.06 | NM_014402 | QP-C      | -2.06 |
| NM_199265 | THSD3         | -2.06 | XM_375298 | KIAA1987  | -2.06 |
| NM_207392 | UNQ467        | -2.06 | XM_373809 | LOC388553 | -2.06 |
| NM_212557 | UNQ689        | -2.06 | NM_006549 | CAMKK2    | -2.05 |
| NM_013276 | CARKL         | -2.05 | NM_003950 | F2RL3     | -2.05 |
| NM_005227 | EFNA4         | -2.05 | NM_005594 | NACA      | -2.05 |
| NM_001029 | RPS26         | -2.05 | XM_371175 | ZNF229    | -2.05 |
| NM_018409 | DKFZP761O0113 | -2.05 | NM_022465 | ZNFN1A4   | -2.05 |
| NM_024631 | FLJ23342      | -2.05 | NM_033182 | FBXO44    | -2.05 |
| NM_173593 | B4GALNAC-T3   | -2.05 | NM_181617 | KRTAP21-2 | -2.05 |
| NM_178839 | LRRTM1        | -2.05 | NM_198698 | KRTAP12-4 | -2.05 |

|           |           |       |              |               |       |
|-----------|-----------|-------|--------------|---------------|-------|
| XM_378044 | LOC402354 | -2.05 | XM_378608    | LOC400541     | -2.05 |
| NM_153809 | TAF1L     | -2.04 | XM_166527    | KIAA0415      | -2.04 |
| NM_022753 | FLJ12903  | -2.04 | XM_290822    | LOC284367     | -2.04 |
| NM_005334 | HCFC1     | -2.03 | NM_004366    | CLCN2         | -2.03 |
| NM_014270 | SLC7A9    | -2.03 | XM_371877    | KIAA0960      | -2.03 |
| NM_004595 | SMS       | -2.03 | NM_001004    | RPLP2         | -2.03 |
| NM_007169 | PEMT      | -2.03 | XM_034872    | 39692         | -2.03 |
| NM_207317 | FLJ32921  | -2.03 | XM_040149    | LOC151273     | -2.03 |
| XM_292468 | LOC342293 | -2.03 | NM_001001411 | LOC163223     | -2.03 |
| NM_000324 | RHAG      | -2.02 | NM_005918    | MDH2          | -2.02 |
| NM_006938 | SNRPD1    | -2.02 | NM_014965    | OIP106        | -2.02 |
| NM_018684 | HCA127    | -2.02 | NM_022130    | GOLPH3        | -2.02 |
| NM_138454 | LOC115861 | -2.02 | NM_152721    | DOK5L         | -2.02 |
| NM_017567 | NAGK      | -2.01 | NM_023947    | MGC3234       | -2.01 |
| NM_006231 | POLE      | -2.01 | NM_006421    | BIG1          | -2.01 |
| NM_002991 | CCL24     | -2.01 | NM_005209    | CRYBA2        | -2.01 |
| NM_001649 | APXL      | -2.01 | NM_001015    | RPS11         | -2.01 |
| NM_005786 | SDCCAG33  | -2.01 | NM_078628    | MSL3L1        | -2.01 |
| NM_007086 | WDHD1     | -2.01 | NM_017894    | ZFP29         | -2.01 |
| NM_018126 | TMEM33    | -2.01 | NM_018373    | SYNJ2BP       | -2.01 |
| NM_024829 | FLJ22662  | -2.01 | NM_183374    | CYP26C1       | -2.01 |
| NM_198995 | C18ORF34  | -2.01 | XM_291200    | LOC340221     | -2.01 |
| NM_003503 | CDC7      | -2    | NM_004814    | HPRP8BP       | -2    |
| NM_138477 | CDAN1     | -2    | NM_024877    | FLJ13265      | -2    |
| NM_032014 | MRPS24    | -2    | NM_030652    | EGFL8         | -2    |
| XM_047462 | SPIRE2    | -2    | NM_178556    | FLJ36180      | -2    |
| NM_194313 | C9ORF48   | -2    | NM_207394    | FLJ45949      | -2    |
| XM_376416 | LOC401204 | -2    | XM_372050    | LOC389674     | -2    |
| NM_145059 | FUK       | -1.99 | NM_005922    | MAP3K4        | -1.99 |
| NM_005458 | GPR51     | -1.99 | NM_031283    | TCF7L1        | -1.99 |
| NM_000187 | HGD       | -1.99 | NM_139057    | ADAMTS17      | -1.99 |
| NM_015247 | CYLD      | -1.99 | NM_002389    | MCP           | -1.99 |
| NM_005733 | KIF20A    | -1.99 | NM_005124    | NUP153        | -1.99 |
| NM_001112 | ADARB1    | -1.99 | NM_016519    | AMBN          | -1.99 |
| NM_018115 | SDAD1     | -1.99 | NM_022149    | MAGEF1        | -1.99 |
| NM_197954 | CLECSF12  | -1.99 | NM_032639    | FAPP2         | -1.99 |
| NM_031909 | C1QTNF4   | -1.99 | NM_152633    | FLJ34064      | -1.99 |
| NM_032958 | POLR2J2   | -1.99 | XM_084845    | LOC144383     | -1.99 |
| XM_166203 | LOC219537 | -1.99 | NM_004420    | DUSP8         | -1.98 |
| NM_004196 | CDKL1     | -1.98 | NM_000180    | GUCY2D        | -1.98 |
| NM_031272 | TEX14     | -1.98 | NM_153839    | GPR111        | -1.98 |
| NM_004450 | ERH       | -1.98 | NM_005177    | ATP6V0A1      | -1.98 |
| NM_006503 | PSMC4     | -1.98 | XM_370737    | FLJ10357      | -1.98 |
| NM_018929 | PCDHGC5   | -1.98 | NM_030816    | DKFZP566D1346 | -1.98 |
| NM_032425 | KIAA1822  | -1.98 | NM_032916    | MGC16279      | -1.98 |
| XM_166432 | LOC221442 | -1.98 | XM_379123    | LOC400999     | -1.98 |

|           |               |       |           |             |       |
|-----------|---------------|-------|-----------|-------------|-------|
| XM_379736 | LOC401628     | -1.98 | NM_016522 | HNT         | -1.97 |
| NM_001070 | TUBG1         | -1.97 | NM_023076 | FLJ23360    | -1.97 |
| NM_000637 | GSR           | -1.97 | NM_001949 | E2F3        | -1.97 |
| XM_291222 | DKFZP586J0619 | -1.97 | NM_024843 | CYBRD1      | -1.97 |
| NM_022740 | HIPK2         | -1.96 | NM_006429 | CCT7        | -1.96 |
| NM_000307 | POU3F4        | -1.96 | NM_006892 | DNMT3B      | -1.96 |
| NM_198904 | GABRG2        | -1.96 | NM_005586 | MDFI        | -1.96 |
| NM_138289 | ACTRT1        | -1.96 | NM_006466 | POLR3F      | -1.96 |
| NM_019606 | FLJ20257      | -1.96 | NM_024763 | FLJ23129    | -1.96 |
| NM_198452 | PNCK          | -1.96 | NM_138328 | RHBDL4      | -1.96 |
| NM_000709 | BCKDHA        | -1.95 | NM_003364 | UPP1        | -1.95 |
| NM_002189 | IL15RA        | -1.95 | NM_002420 | TRPM1       | -1.95 |
| NM_031450 | P5326         | -1.95 | NM_006423 | RABAC1      | -1.95 |
| NM_005431 | XRCC2         | -1.95 | NM_016034 | MRPS2       | -1.95 |
| NM_020407 | RHBG          | -1.95 | NM_032890 | DISP1       | -1.95 |
| NM_005163 | AKT1          | -1.94 | NM_004496 | FOXA1       | -1.94 |
| NM_012067 | AKR7A3        | -1.94 | NM_001336 | CTSZ        | -1.94 |
| NM_001969 | EIF5          | -1.94 | NM_006000 | TUBA1       | -1.94 |
| NM_003977 | AIP           | -1.94 | NM_005068 | SIM1        | -1.94 |
| NM_004543 | NEB           | -1.94 | NM_033375 | MYO1C       | -1.94 |
| NM_001017 | RPS13         | -1.94 | NM_006829 | C10ORF116   | -1.94 |
| NM_015169 | RRS1          | -1.94 | NM_013346 | SNX12       | -1.94 |
| NM_013368 | SERTAD3       | -1.94 | NM_016175 | LOC51149    | -1.94 |
| NM_022762 | FLJ22318      | -1.94 | XM_375495 | AATK        | -1.93 |
| NM_002764 | PRPS1         | -1.93 | NM_004361 | CDH7        | -1.93 |
| NM_138473 | SP1           | -1.93 | NM_002974 | SERPINB4    | -1.93 |
| NM_005721 | ACTR3         | -1.93 | NM_013285 | HUMAQUANTIG | -1.93 |
| NM_016312 | WBP11         | -1.93 | NM_018254 | RCOR3       | -1.93 |
| NM_020444 | KIAA1191      | -1.93 | NM_032862 | TIGD5       | -1.93 |
| XM_291142 | LOC115548     | -1.93 | NM_138812 | LOC143241   | -1.93 |
| NM_053041 | COMMD7        | -1.93 | XM_376924 | C9ORF62     | -1.93 |
| NM_152999 | STEAP2        | -1.93 | NM_207350 | MGC72104    | -1.93 |
| NM_207346 | LOC283989     | -1.93 | XM_371314 | LOC388699   | -1.93 |
| XM_379336 | LOC401188     | -1.93 | NM_052853 | ADCK2       | -1.92 |
| NM_002714 | PPP1R10       | -1.92 | NM_145754 | KIFC2       | -1.92 |
| NM_178014 | OK/SW-CL.56   | -1.92 | NM_000508 | FGA         | -1.92 |
| NM_014303 | PES1          | -1.92 | XM_372823 | OR2L2       | -1.92 |
| NM_145047 | NOR1          | -1.92 | XM_376722 | LOC155036   | -1.92 |
| XM_377725 | LOC402066     | -1.92 | NM_005307 | GRK4        | -1.91 |
| NM_138697 | TAS1R1        | -1.91 | NM_003338 | UBE2D1      | -1.91 |
| NM_004429 | EFNB1         | -1.91 | NM_000340 | SLC2A2      | -1.91 |
| NM_001655 | ARCN1         | -1.91 | NM_007198 | PROSC       | -1.91 |
| NM_017827 | SARS2         | -1.91 | NM_194276 | FLJ20209    | -1.91 |
| NM_174931 | FLJ38348      | -1.91 | NM_181724 | LOC338773   | -1.91 |
| XM_294534 | LOC347169     | -1.91 | XM_379206 | LOC401081   | -1.91 |
| NM_005837 | POP7          | -1.9  | NM_000462 | UBE3A       | -1.9  |

|           |           |       |              |               |       |
|-----------|-----------|-------|--------------|---------------|-------|
| NM_004229 | CRSP2     | -1.9  | NM_001547    | IFIT2         | -1.9  |
| NM_014656 | KIAA0040  | -1.9  | XM_043272    | JMJD3         | -1.9  |
| NM_014548 | TMOD2     | -1.9  | NM_024565    | FLJ14166      | -1.9  |
| NM_032765 | TRIM52    | -1.9  | NM_138452    | DHRS1         | -1.9  |
| XM_377919 | LOC402237 | -1.9  | NM_012082    | ZFPM2         | -1.89 |
| NM_004118 | FKHL18    | -1.89 | NM_005313    | GRP58         | -1.89 |
| NM_004100 | EYA4      | -1.89 | NM_001447    | FAT2          | -1.89 |
| NM_002886 | RAP2B     | -1.89 | NM_021058    | HIST1H2BJ     | -1.89 |
| NM_007033 | RER1      | -1.89 | NM_014178    | STXBP6        | -1.89 |
| NM_020313 | LOC57019  | -1.89 | NM_021635    | PBOV1         | -1.89 |
| NM_024633 | C14ORF139 | -1.89 | NM_031422    | CHST9         | -1.89 |
| NM_032868 | FLJ14981  | -1.89 | NM_152410    | PACRG         | -1.89 |
| NM_152483 | FLJ25328  | -1.89 | NM_182700    | SP8           | -1.89 |
| XM_373367 | LOC392531 | -1.89 | NM_001003894 | CDY1B         | -1.89 |
| NM_004897 | MINPP1    | -1.88 | NM_005429    | VEGFC         | -1.88 |
| NM_025198 | LOC80298  | -1.88 | NM_006733    | FSHPRH1       | -1.88 |
| NM_001019 | RPS15A    | -1.88 | NM_014669    | NUP93         | -1.88 |
| NM_006831 | HEAB      | -1.88 | NM_030967    | KRTAP1-1      | -1.88 |
| NM_033448 | KRT6IRS   | -1.88 | NM_182548    | MGC33835      | -1.88 |
| NM_173689 | CRB2      | -1.88 | XM_372128    | LOC389772     | -1.88 |
| XM_380138 | LOC402586 | -1.88 | XM_372494    | LOC390414     | -1.88 |
| NM_000215 | JAK3      | -1.87 | NM_001756    | SERPINA6      | -1.87 |
| NM_000312 | PROC      | -1.87 | NM_006112    | PPIE          | -1.87 |
| NM_022575 | VPS16     | -1.87 | NM_023942    | MGC3036       | -1.87 |
| NM_015645 | C1QTNF5   | -1.87 | NM_181775    | DKFZP434G0625 | -1.87 |
| NM_152420 | C9ORF41   | -1.87 | XM_116971    | LOC196993     | -1.87 |
| NM_145719 | TIGD3     | -1.87 | XM_294592    | LOC347273     | -1.87 |
| NM_004125 | GNG10     | -1.86 | NM_024075    | LENG5         | -1.86 |
| NM_004043 | ASMT      | -1.86 | NM_000381    | MID1          | -1.86 |
| NM_000640 | IL13RA2   | -1.86 | AF345651     | COAS3         | -1.86 |
| J00146    | DHFRP1    | -1.86 | NM_005952    | MT1X          | -1.86 |
| NM_031492 | MGC10871  | -1.86 | NM_178465    | TSPYL3        | -1.86 |
| XM_018399 | LOC144983 | -1.86 | NM_153021    | PLB1          | -1.86 |
| XM_371593 | LOC389075 | -1.86 | XM_370973    | LOC388255     | -1.86 |
| NM_001105 | ACVR1     | -1.85 | NM_018120    | FLJ10511      | -1.85 |
| NM_005347 | HSPA5     | -1.85 | NM_003183    | ADAM17        | -1.85 |
| NM_003969 | UBE2M     | -1.85 | NM_003334    | UBE1          | -1.85 |
| NM_003744 | NUMB      | -1.85 | NM_003827    | NAPA          | -1.85 |
| NM_006366 | CAP2      | -1.85 | NM_013292    | HUMMLC2B      | -1.85 |
| NM_030824 | ZNF442    | -1.85 | NM_032906    | MGC14156      | -1.85 |
| NM_001153 | ANXA4     | -1.84 | NM_002343    | LTF           | -1.84 |
| NM_005911 | MAT2A     | -1.84 | XM_375853    | FLJ10359      | -1.84 |
| NM_017945 | SLC35A5   | -1.84 | NM_147192    | DMBX1         | -1.84 |
| XM_295309 | LOC343052 | -1.84 | XM_374386    | LOC392617     | -1.84 |
| XM_371089 | LOC388438 | -1.84 | NM_004954    | MARK2         | -1.83 |
| NM_018030 | OSBPL1A   | -1.83 | NM_003000    | SDHB          | -1.83 |

|           |               |       |           |               |       |
|-----------|---------------|-------|-----------|---------------|-------|
| NM_020311 | CMKOR1        | -1.83 | NM_004369 | COL6A3        | -1.83 |
| NM_013364 | PNMA3         | -1.83 | NM_017556 | FBLP-1        | -1.83 |
| NM_022574 | PERQ1         | -1.83 | NM_199262 | SP6           | -1.83 |
| NM_139074 | DEFB127       | -1.83 | NM_198859 | PRICKLE2      | -1.83 |
| NM_012346 | NUP62         | -1.83 | XM_374014 | LOC389050     | -1.83 |
| XM_379531 | LOC401434     | -1.83 | NM_004223 | UBE2L6        | -1.82 |
| NM_000722 | CACNA2D1      | -1.82 | NM_003848 | SUCLG2        | -1.82 |
| NM_006620 | HBS1L         | -1.82 | NM_013236 | E46L          | -1.82 |
| NM_016573 | GMIP          | -1.82 | NM_024329 | EFHD2         | -1.82 |
| XM_291019 | FLJ13305      | -1.82 | NM_032266 | C2ORF16       | -1.82 |
| NM_024996 | EFG1          | -1.82 | XM_371478 | LOC388927     | -1.82 |
| XM_371068 | LOC388401     | -1.82 | NM_006177 | NRL           | -1.81 |
| NM_002480 | PPP1R12A      | -1.81 | NM_001188 | BAK1          | -1.81 |
| NM_053056 | CCND1         | -1.81 | NM_175870 | LOC90925      | -1.81 |
| NM_004500 | HNRPC         | -1.81 | NM_012256 | ZNF212        | -1.81 |
| NM_001120 | TETTRAN       | -1.81 | NM_018433 | JMJD1A        | -1.81 |
| NM_022764 | FLJ12998      | -1.81 | NM_198444 | UNQ9366       | -1.81 |
| NM_153688 | ZFP1          | -1.81 | NM_145177 | DHRXS         | -1.81 |
| NM_182557 | BCL9L         | -1.81 | XM_088072 | LOC154907     | -1.81 |
| XM_378301 | LOC399924     | -1.81 | XM_378309 | LOC399951     | -1.81 |
| XM_372574 | LOC390595     | -1.81 | XM_375491 | LOC400622     | -1.81 |
| NM_001320 | CSNK2B        | -1.8  | NM_004424 | E4F1          | -1.8  |
| NM_012331 | MSRA          | -1.8  | NM_000673 | ADH7          | -1.8  |
| NM_001006 | RPS3A         | -1.8  | NM_015308 | FNBP4         | -1.8  |
| NM_152316 | FLJ38968      | -1.8  | NM_194281 | C18ORF37      | -1.8  |
| XM_296817 | LOC342346     | -1.8  | XM_371736 | LOC389286     | -1.8  |
| NM_000934 | SERPINF2      | -1.79 | NM_003168 | SUPT4H1       | -1.79 |
| NM_001515 | GTF2H2        | -1.79 | NM_001316 | CSE1L         | -1.79 |
| NM_004277 | SLC25A27      | -1.79 | NM_004305 | BIN1          | -1.79 |
| XM_374989 | KIAA0373      | -1.79 | NM_012126 | CHST5         | -1.79 |
| NM_024100 | WDR18         | -1.79 | NM_025239 | PDCD1LG2      | -1.79 |
| NM_032927 | MGC13159      | -1.79 | NM_144601 | CKLFSF3       | -1.79 |
| NM_173488 | SLCO6A1       | -1.79 | NM_152704 | FLJ25477      | -1.79 |
| XM_378832 | LOC284661     | -1.79 | NM_152619 | MGC45428      | -1.78 |
| NM_032682 | FOXP1         | -1.78 | NM_001335 | CTSW          | -1.78 |
| NM_001354 | AKR1C2        | -1.78 | NM_001757 | CBR1          | -1.78 |
| NM_002197 | ACO1          | -1.78 | NM_005321 | HIST1H1E      | -1.78 |
| NM_001412 | EIF1AX        | -1.78 | NM_016167 | NOL7          | -1.78 |
| NM_016077 | BIT1          | -1.78 | NM_024772 | ZMYM1         | -1.78 |
| NM_031478 | DKFZP434I2117 | -1.78 | NM_152902 | MGC3794       | -1.78 |
| XM_173015 | LOC256483     | -1.78 | NM_003557 | PIP5K1A       | -1.77 |
| NM_003323 | TULP2         | -1.77 | NM_003329 | TXN           | -1.77 |
| NM_145914 | ZNF38         | -1.77 | NM_015531 | DKFZP586P0123 | -1.77 |
| NM_024076 | KCTD15        | -1.77 | NM_080862 | SSB4          | -1.77 |
| NM_153266 | MGC33486      | -1.77 | XM_063202 | LOC122585     | -1.77 |
| XM_374162 | LOC389370     | -1.77 | XM_375418 | LOC400581     | -1.77 |

|              |               |       |           |               |       |
|--------------|---------------|-------|-----------|---------------|-------|
| NM_025233    | COASY         | -1.76 | XM_376652 | DLX6          | -1.76 |
| NM_020365    | EIF2B3        | -1.76 | NM_000286 | PEX12         | -1.76 |
| NM_017532    | HSAJ2425      | -1.76 | NM_004318 | ASPH          | -1.76 |
| NM_002947    | RPA3          | -1.76 | NM_004647 | DPF1          | -1.76 |
| XM_113678    | NUP160        | -1.76 | NM_016190 | C1ORF10       | -1.76 |
| NM_021925    | FLJ21820      | -1.76 | NM_032261 | C21ORF56      | -1.76 |
| NM_138774    | C19ORF22      | -1.76 | NM_153685 | DKFZP547D2210 | -1.76 |
| NM_173806    | MGC50721      | -1.76 | NM_002646 | PIK3C2B       | -1.75 |
| NM_012302    | LPHN2         | -1.75 | NM_006006 | ZBTB16        | -1.75 |
| NM_016229    | CYB5R2        | -1.75 | NM_003567 | BCAR3         | -1.75 |
| NM_005358    | LMO7          | -1.75 | NM_000366 | TPM1          | -1.75 |
| NM_005576    | LOXL1         | -1.75 | XM_044461 | KIAA1102      | -1.75 |
| NM_018302    | FLJ11017      | -1.75 | NM_025152 | C14ORF127     | -1.75 |
| XM_375243    | KIAA1920      | -1.75 | XM_371501 | MGC22014      | -1.75 |
| XM_371108    | LOC388462     | -1.75 | NM_000869 | HTR3A         | -1.74 |
| NM_003224    | ARFRP1        | -1.74 | NM_018494 | LRDD          | -1.74 |
| NM_021785    | RAI2          | -1.74 | NM_005185 | CALML3        | -1.74 |
| NM_002362    | MAGEA4        | -1.74 | NM_005371 | METT1         | -1.74 |
| NM_005617    | RPS14         | -1.74 | NM_003136 | SRP54         | -1.74 |
| NM_005882    | MAEA          | -1.74 | NM_015161 | ARL6IP        | -1.74 |
| NM_007367    | RALY          | -1.74 | XM_049237 | KIAA0841      | -1.74 |
| NM_145794    | DONSON        | -1.74 | NM_016604 | JMJD1B        | -1.74 |
| NM_024571    | C16ORF33      | -1.74 | NM_030629 | CMIP          | -1.74 |
| NM_152391    | C2ORF22       | -1.74 | NM_173824 | MGC26717      | -1.74 |
| XM_294017    | SLC35D3       | -1.74 | NM_182600 | LOC286359     | -1.74 |
| NM_207492    | FLJ44477      | -1.74 | XM_379372 | LOC401216     | -1.74 |
| NM_001005478 | GGNBP1        | -1.74 | NM_012096 | APPL          | -1.73 |
| NM_007254    | PNKP          | -1.73 | NM_006219 | PIK3CB        | -1.73 |
| NM_173500    | TTBK2         | -1.73 | NM_030876 | OR5V1         | -1.73 |
| NM_005980    | S100P         | -1.73 | NM_006372 | SYNCRIP       | -1.73 |
| NM_000197    | HSD17B3       | -1.73 | NM_021801 | MMP26         | -1.73 |
| NM_004394    | DAP           | -1.73 | NM_024298 | LENG4         | -1.73 |
| NM_002494    | NDUFC1        | -1.73 | NM_001026 | RPS24         | -1.73 |
| NM_003293    | TPS1          | -1.73 | NM_014640 | TTLL4         | -1.73 |
| NM_004704    | RNU3IP2       | -1.73 | NM_199450 | ZNF365        | -1.73 |
| NM_014033    | DKFZP586A0522 | -1.73 | NM_016368 | ISYNA1        | -1.73 |
| NM_178167    | ZNF598        | -1.73 | NM_198690 | KRTAP18-9     | -1.73 |
| XM_173105    | LOC256283     | -1.73 | XM_377527 | LOC401911     | -1.73 |
| NM_005297    | GPR24         | -1.72 | NM_012325 | MAPRE1        | -1.72 |
| NM_000625    | NOS2A         | -1.72 | NM_003298 | NR2C2         | -1.72 |
| NM_001851    | COL9A1        | -1.72 | NM_020839 | KIAA1449      | -1.72 |
| NM_022834    | WARP          | -1.72 | NM_032805 | ZNF206        | -1.72 |
| NM_052969    | RPL39L        | -1.72 | XM_058956 | PCP2          | -1.72 |
| XM_113967    | LOC201475     | -1.72 | XM_293416 | LOC347549     | -1.72 |
| XM_379461    | LOC401291     | -1.72 | NM_021634 | LGR7          | -1.71 |
| NM_001968    | EIF4E         | -1.71 | NM_012320 | LYPLA3        | -1.71 |



|           |              |       |           |               |       |
|-----------|--------------|-------|-----------|---------------|-------|
| NM_021797 | CHIA         | -1.71 | NM_014570 | ARFGAP3       | -1.71 |
| NM_018947 | CYCS         | -1.71 | NM_001402 | EEF1A1        | -1.71 |
| NM_003530 | HIST1H3D     | -1.71 | NM_003847 | PEX11A        | -1.71 |
| NM_006758 | U2AF1        | -1.71 | NM_012151 | F8A           | -1.71 |
| NM_015261 | KIAA0056     | -1.71 | XM_290820 | FLJ10211      | -1.71 |
| NM_020889 | PHF12        | -1.71 | NM_032561 | C22ORF23      | -1.71 |
| NM_152331 | PTE2B        | -1.71 | NM_145315 | LACE1         | -1.71 |
| NM_152783 | MGC25181     | -1.71 | NM_198851 | LOC348645     | -1.71 |
| XM_086287 | LOC148713    | -1.71 | XM_379036 | LOC400890     | -1.71 |
| NM_001204 | BMPR2        | -1.7  | NM_005283 | XCR1          | -1.7  |
| NM_006988 | ADAMTS1      | -1.7  | NM_004301 | BAF53A        | -1.7  |
| NM_006528 | TFPI2        | -1.7  | NM_007053 | CD160         | -1.7  |
| NM_006435 | IFITM2       | -1.7  | NM_005897 | IPP           | -1.7  |
| NM_005000 | NDUFA5       | -1.7  | NM_004553 | NDUFS6        | -1.7  |
| NM_001016 | RPS12        | -1.7  | NM_181453 | GCC2          | -1.7  |
| NM_014388 | MGC29875     | -1.7  | NM_013259 | NP25          | -1.7  |
| NM_018321 | BRIX         | -1.7  | NM_145117 | NAV2          | -1.7  |
| NM_173680 | MGC33584     | -1.7  | XM_374526 | LOC392793     | -1.7  |
| XM_370763 | LOC387991    | -1.7  | NM_173655 | DKFZp434C1418 | -1.69 |
| NM_000865 | HTR1E        | -1.69 | NM_005148 | UNC119        | -1.69 |
| NM_002993 | CXCL6        | -1.69 | NM_002013 | FKBP3         | -1.69 |
| NM_012304 | FBXL7        | -1.69 | NM_012179 | FBXO7         | -1.69 |
| NM_000166 | GJB1         | -1.69 | NM_031423 | CDCA1         | -1.69 |
| NM_014299 | BRD4         | -1.69 | NM_015582 | DKFZP564B147  | -1.69 |
| NM_022360 | FAM12B       | -1.69 | NM_194286 | LOC144747     | -1.69 |
| NM_207476 | DKFZP547B139 | -1.69 | XM_210365 | LOC284288     | -1.69 |
| XM_374095 | LOC389242    | -1.69 | XM_378392 | LOC400087     | -1.69 |
| NM_001721 | BMX          | -1.68 | NM_178510 | ANKK1         | -1.68 |
| NM_014586 | HUNK         | -1.68 | NM_002613 | PDPK1         | -1.68 |
| NM_004783 | TAO1         | -1.68 | NM_004852 | ONECUT2       | -1.68 |
| NM_000532 | PCCB         | -1.68 | NM_032782 | HAVCR2        | -1.68 |
| NM_144633 | KCNH8        | -1.68 | NM_013436 | NCKAP1        | -1.68 |
| NM_006924 | SFRS1        | -1.68 | NM_001084 | PLOD3         | -1.68 |
| NM_005723 | TM4SF9       | -1.68 | NM_014420 | DKK4          | -1.68 |
| NM_015849 | ELA2B        | -1.68 | NM_017966 | FLJ20847      | -1.68 |
| NM_019895 | C3ORF4       | -1.68 | NM_030914 | C9ORF74       | -1.68 |
| NM_033427 | CTTNBP2      | -1.68 | NM_033504 | BCLP          | -1.68 |
| NM_054114 | TAGAP        | -1.68 | XM_085231 | LOC145783     | -1.68 |
| XM_371359 | LOC388763    | -1.68 | XM_372354 | LOC390059     | -1.68 |
| NM_002220 | ITPKA        | -1.67 | NM_001053 | SSTR5         | -1.67 |
| NM_012148 | DUX3         | -1.67 | NM_004463 | FGD1          | -1.67 |
| NM_014213 | HOXD9        | -1.67 | NM_002445 | MSR1          | -1.67 |
| NM_022555 | HLA-DRB3     | -1.67 | NM_000800 | FGF1          | -1.67 |
| NM_030657 | LIM2         | -1.67 | NM_003125 | SPRR1B        | -1.67 |
| NM_018679 | TCP11        | -1.67 | NM_005708 | GPC6          | -1.67 |
| XM_375105 | KIAA0329     | -1.67 | NM_007192 | SUPT16H       | -1.67 |

|              |              |       |              |           |       |
|--------------|--------------|-------|--------------|-----------|-------|
| NM_032593    | HINT2        | -1.67 | NM_138358    | LOC90580  | -1.67 |
| XM_370927    | RNF151       | -1.67 | XM_378454    | LOC283547 | -1.67 |
| XM_292596    | LOC342541    | -1.67 | XM_379409    | LOC401256 | -1.67 |
| XM_374292    | LOC389707    | -1.67 | XM_377500    | LOC401895 | -1.67 |
| NM_138964    | GPR73        | -1.66 | NM_004559    | NSEP1     | -1.66 |
| NM_003813    | ADAM21       | -1.66 | NM_000125    | ESR1      | -1.66 |
| NM_004039    | ANXA2        | -1.66 | NM_002951    | RPN2      | -1.66 |
| NM_012113    | CA14         | -1.66 | NM_015387    | PREI3     | -1.66 |
| NM_016486    | LOC51249     | -1.66 | NM_017752    | FLJ20298  | -1.66 |
| NM_020182    | TMEPAI       | -1.66 | NM_032204    | ASC1P100  | -1.66 |
| NM_052861    | MGC21675     | -1.66 | NM_174913    | C14ORF21  | -1.66 |
| XM_114447    | KIAA1999     | -1.66 | NM_173640    | R-SPONDIN | -1.66 |
| XM_371663    | LOC389147    | -1.66 | XM_378741    | LOC400644 | -1.66 |
| NM_000679    | ADRA1B       | -1.65 | NM_006255    | PRKCH     | -1.65 |
| NM_003942    | RPS6KA4      | -1.65 | NM_080823    | SRMS      | -1.65 |
| NM_005955    | MTF1         | -1.65 | NM_175744    | RHOC      | -1.65 |
| NM_017533    | MYH4         | -1.65 | NM_003093    | SNRPC     | -1.65 |
| NM_013310    | C2ORF27      | -1.65 | NM_014574    | STRN3     | -1.65 |
| NM_016463    | CXXC5        | -1.65 | NM_016275    | SELT      | -1.65 |
| NM_024526    | EPS8L3       | -1.65 | XM_039908    | LOC91664  | -1.65 |
| XM_088951    | OLFM3        | -1.65 | NM_144583    | ATP6V1C2  | -1.65 |
| XM_069595    | LOC135896    | -1.65 | XM_294328    | LOC346588 | -1.65 |
| XM_376412    | LOC401202    | -1.65 | XM_373578    | LOC387950 | -1.65 |
| NM_001001960 | OR5W2        | -1.65 | NM_003578    | SOAT2     | -1.64 |
| NM_004651    | USP11        | -1.64 | NM_001376    | DNCH1     | -1.64 |
| NM_001306    | CLDN3        | -1.64 | NM_006855    | KDEL3     | -1.64 |
| NM_005466    | MED6         | -1.64 | NM_003304    | TRPC1     | -1.64 |
| NM_004966    | HNRPF        | -1.64 | NM_001006608 | STGC3     | -1.64 |
| NM_016161    | ALPHA4GNT    | -1.64 | NM_002790    | PSMA5     | -1.64 |
| NM_002791    | PSMA6        | -1.64 | NM_001023    | RPS20     | -1.64 |
| NM_013286    | HUMAGCGB     | -1.64 | NM_024113    | MGC4707   | -1.64 |
| NM_005684    | GPR52        | -1.63 | NM_014360    | NKX2-8    | -1.63 |
| NM_015401    | HDAC7A       | -1.63 | NM_016239    | MYO15A    | -1.63 |
| NM_022080    | NAPB         | -1.63 | NM_013339    | ALG6      | -1.63 |
| NM_005383    | NEU2         | -1.63 | NM_003731    | SSNA1     | -1.63 |
| XM_032397    | DKFZP564I122 | -1.63 | NM_016046    | EXOSC1    | -1.63 |
| NM_016632    | LOC51326     | -1.63 | NM_032725    | MGC13125  | -1.63 |
| NM_207313    | LOC124842    | -1.63 | XM_378675    | LOC147093 | -1.63 |
| XM_371604    | FLJ37034     | -1.63 | XM_379321    | LOC340107 | -1.63 |
| NM_199181    | FLJ44670     | -1.63 | XM_209227    | LOC391087 | -1.63 |
| XM_372588    | LOC390633    | -1.63 | NM_001800    | CDKN2D    | -1.62 |
| NM_001337    | CX3CR1       | -1.62 | NM_001617    | ADD2      | -1.62 |
| NM_006216    | SERPINE2     | -1.62 | NM_007081    | RABL2B    | -1.62 |
| NM_001936    | DPP6         | -1.62 | XM_039627    | CNTN3     | -1.62 |
| NM_015969    | MRPS17       | -1.62 | NM_018073    | RNF137    | -1.62 |
| NM_018176    | LGI2         | -1.62 | NM_024953    | FLJ13089  | -1.62 |

|              |              |       |           |           |       |
|--------------|--------------|-------|-----------|-----------|-------|
| XM_208927    | FLJ36208     | -1.62 | XM_290401 | LOC340318 | -1.62 |
| NM_182704    | SELV         | -1.62 | NM_206966 | MGC23985  | -1.62 |
| XM_208261    | LOC284890    | -1.62 | XM_375814 | LOC400790 | -1.62 |
| NM_005577    | LPA          | -1.61 | NM_002848 | PTPRO     | -1.61 |
| NM_000073    | CD3G         | -1.61 | NM_000091 | COL4A3    | -1.61 |
| NM_021146    | CDT6         | -1.61 | NM_001358 | DHX15     | -1.61 |
| NM_014042    | DKFZP564M082 | -1.61 | NM_021154 | PSAT1     | -1.61 |
| NM_018218    | USP40        | -1.61 | NM_020933 | ZNF317    | -1.61 |
| NM_033053    | DMRTC1       | -1.61 | NM_024515 | MGC4645   | -1.61 |
| XM_375783    | KIAA1245     | -1.61 | XM_376303 | LOC285484 | -1.61 |
| NM_175834    | KRT6L        | -1.61 | XM_371245 | LOC388625 | -1.61 |
| NM_002745    | MAPK1        | -1.6  | NM_012378 | OR8B8     | -1.6  |
| NM_020167    | NMUR2        | -1.6  | NM_001675 | ATF4      | -1.6  |
| NM_004805    | POLR2D       | -1.6  | NM_002000 | FCAR      | -1.6  |
| NM_004042    | ARSF         | -1.6  | NM_000792 | DIO1      | -1.6  |
| NM_003480    | MFAP5        | -1.6  | NM_003493 | HIST3H3   | -1.6  |
| NM_003665    | FCN3         | -1.6  | NM_005155 | PPT2      | -1.6  |
| NM_015613    | LRRC21       | -1.6  | NM_018286 | FLJ10970  | -1.6  |
| NM_032048    | EMILIN2      | -1.6  | NM_207459 | FLJ35767  | -1.6  |
| XM_066243    | LOC128939    | -1.6  | XM_113596 | LOC196752 | -1.6  |
| XM_294261    | LOC346545    | -1.6  | XM_378472 | LOC400236 | -1.6  |
| XM_373543    | LOC387876    | -1.6  | NM_005883 | APC2      | -1.59 |
| NM_005243    | EWSR1        | -1.59 | NM_021209 | CARD12    | -1.59 |
| NM_004991    | MDS1         | -1.59 | NM_016373 | WVOX      | -1.59 |
| NM_001903    | CTNNA1       | -1.59 | NM_001214 | C16ORF3   | -1.59 |
| NM_002282    | KRTHB3       | -1.59 | NM_005499 | UBA2      | -1.59 |
| NM_007069    | HRASLS3      | -1.59 | NM_015641 | TES       | -1.59 |
| NM_017758    | FLJ20308     | -1.59 | NM_021227 | DC2       | -1.59 |
| XM_380171    | IRX1         | -1.59 | NM_030581 | WDR59     | -1.59 |
| NM_032518    | COL25A1      | -1.59 | NM_148178 | C9ORF23   | -1.59 |
| XM_084000    | MCART2       | -1.59 | XM_378955 | LOC400829 | -1.59 |
| XM_371645    | LOC389127    | -1.59 | XM_373252 | LOC392221 | -1.59 |
| NM_001001710 | LOC401565    | -1.59 | NM_004262 | HAT       | -1.58 |
| NM_000964    | RARA         | -1.58 | NM_005760 | CEBPZ     | -1.58 |
| NM_024736    | GSDMDC1      | -1.58 | NM_080792 | PTPNS1    | -1.58 |
| NM_014839    | LPPR4        | -1.58 | NM_017599 | VEZATIN   | -1.58 |
| NM_018379    | FLJ11280     | -1.58 | NM_020209 | SHD       | -1.58 |
| NM_175872    | FLJ38451     | -1.58 | NM_152909 | ZNF548    | -1.58 |
| NM_207102    | FBXW12       | -1.58 | NM_004698 | PRPF3     | -1.58 |
| XM_373985    | LOC388948    | -1.58 | XM_377675 | LOC402016 | -1.58 |
| NM_030946    | OR5U1        | -1.58 | NM_003742 | ABCB11    | -1.57 |
| NM_003169    | SUPT5H       | -1.57 | XM_495987 | GNG2      | -1.57 |
| NM_020448    | DJ462O23.2   | -1.57 | NM_152397 | MGC39725  | -1.57 |
| NM_152502    | FLJ32154     | -1.57 | XM_378201 | LOC282980 | -1.57 |
| NM_153248    | MGC14276     | -1.57 | XM_372816 | LOC391169 | -1.57 |
| XM_378648    | LOC400572    | -1.57 | XM_373922 | LOC388807 | -1.57 |

|           |               |       |           |               |       |
|-----------|---------------|-------|-----------|---------------|-------|
| NM_054105 | OR6C2         | -1.57 | NM_002980 | SCTR          | -1.56 |
| NM_018899 | PCDHAC2       | -1.56 | NM_000554 | CRX           | -1.56 |
| NM_022468 | MMP25         | -1.56 | NM_000547 | TPO           | -1.56 |
| NM_003248 | THBS4         | -1.56 | NM_001774 | CD37          | -1.56 |
| NM_018455 | BM039         | -1.56 | NM_012091 | ADAT1         | -1.56 |
| NM_001014 | RPS10         | -1.56 | NM_017585 | SLC2A6        | -1.56 |
| NM_017417 | GALNT8        | -1.56 | NM_022101 | FLJ22965      | -1.56 |
| NM_024598 | FLJ13154      | -1.56 | NM_144707 | PROM2         | -1.56 |
| NM_178549 | MGC42493      | -1.56 | NM_198582 | FLJ43374      | -1.56 |
| XM_373546 | LOC387884     | -1.56 | NM_002627 | PFKP          | -1.55 |
| NM_000018 | ACADVL        | -1.55 | NM_000694 | ALDH3B1       | -1.55 |
| NM_003236 | TGFA          | -1.55 | NM_007124 | UTRN          | -1.55 |
| NM_012092 | ICOS          | -1.55 | NM_006863 | LILRA1        | -1.55 |
| NM_018644 | B3GAT1        | -1.55 | NM_016305 | SS18L2        | -1.55 |
| NM_015885 | PCF11         | -1.55 | NM_031299 | CDCA3         | -1.55 |
| NM_031440 | TMEM7         | -1.55 | NM_032562 | PLA2G12B      | -1.55 |
| NM_130441 | CLECSF7       | -1.55 | XM_372950 | LOC391426     | -1.55 |
| NM_001260 | CDK8          | -1.54 | NM_017425 | SPA17         | -1.54 |
| NM_006599 | NFAT5         | -1.54 | NM_002622 | PFDN1         | -1.54 |
| NM_004737 | LARGE         | -1.54 | NM_031886 | KCNA7         | -1.54 |
| NM_018410 | DKFZP762E1312 | -1.54 | NM_001436 | FBL           | -1.54 |
| NM_003080 | SMPD2         | -1.54 | XM_375651 | KIAA1115      | -1.54 |
| NM_015962 | C14ORF111     | -1.54 | NM_018589 | C14ORF116     | -1.54 |
| NM_018918 | PCDHGA5       | -1.54 | NM_020854 | KIAA1468      | -1.54 |
| NM_138460 | CKLFSF5       | -1.54 | NM_153044 | FLJ35801      | -1.54 |
| NM_178552 | MGC35206      | -1.54 | XM_091886 | LOC162962     | -1.54 |
| XM_294692 | LOC338749     | -1.54 | XM_374836 | LOC399815     | -1.54 |
| NM_033180 | OR51B2        | -1.53 | NM_004634 | BRPF1         | -1.53 |
| NM_005496 | SMC4L1        | -1.53 | NM_000199 | SGSH          | -1.53 |
| NM_014697 | CAPON         | -1.53 | NM_006919 | SERPINB3      | -1.53 |
| NM_016085 | C2ORF28       | -1.53 | NM_006101 | KNTC2         | -1.53 |
| NM_021916 | ZNF70         | -1.53 | NM_145238 | ZNF31         | -1.53 |
| NM_014366 | NS            | -1.53 | NM_018230 | NUP133        | -1.53 |
| NM_021165 | KIAA1747      | -1.53 | NM_032588 | RNF28         | -1.53 |
| NM_080839 | GGTL4         | -1.53 | NM_058172 | ANTXR2        | -1.53 |
| NM_080871 | ASB10         | -1.53 | NM_207323 | DKFZP667M2411 | -1.53 |
| XM_371923 | LOC389523     | -1.53 | XM_370649 | LOC387805     | -1.53 |
| XM_370883 | LOC388148     | -1.53 | NM_001184 | ATR           | -1.52 |
| NM_014975 | SAST          | -1.52 | NM_005928 | MFGE8         | -1.52 |
| NM_006640 | MSF           | -1.52 | NM_012461 | TINF2         | -1.52 |
| NM_003167 | SULT2A1       | -1.52 | NM_005364 | MAGEA8        | -1.52 |
| NM_018956 | C9ORF9        | -1.52 | NM_024793 | KIAA0643      | -1.52 |
| NM_015534 | ZZZ3          | -1.52 | NM_016613 | DKFZP434L142  | -1.52 |
| NM_018260 | FLJ10891      | -1.52 | NM_018023 | FLJ10201      | -1.52 |
| NM_052942 | GBP5          | -1.52 | NM_020841 | OSBPL8        | -1.52 |
| NM_138373 | MYADM         | -1.52 | NM_153338 | FLJ90165      | -1.52 |

|              |           |       |           |            |       |
|--------------|-----------|-------|-----------|------------|-------|
| NM_080431    | ARPM2     | -1.52 | NM_139282 | OTEX       | -1.52 |
| NM_152749    | MGC33190  | -1.52 | NM_173694 | ATP11C     | -1.52 |
| NM_181726    | LRP2BP    | -1.52 | NM_178177 | NMNAT3     | -1.52 |
| NM_003511    | HIST1H2AL | -1.52 | XM_495886 | KIAA1991   | -1.52 |
| XM_371490    | LOC388943 | -1.52 | NM_000875 | IGF1R      | -1.51 |
| NM_006496    | GNAI3     | -1.51 | NM_019839 | LTB4R2     | -1.51 |
| NM_004571    | PKNOX1    | -1.51 | NM_005597 | NFIC       | -1.51 |
| NM_138340    | ABHD3     | -1.51 | NM_000196 | HSD11B2    | -1.51 |
| NM_031282    | IRTA1     | -1.51 | NM_052850 | GADD45GIP1 | -1.51 |
| NM_024700    | SNIP1     | -1.51 | NM_003849 | SUCLG1     | -1.51 |
| NM_019043    | APBB1IP   | -1.51 | NM_144570 | C16ORF34   | -1.51 |
| NM_138369    | LOC91272  | -1.51 | XM_055481 | KIAA1915   | -1.51 |
| NM_033419    | PERLD1    | -1.51 | NM_152590 | FLJ36004   | -1.51 |
| XM_059396    | LOC130063 | -1.51 | XM_294019 | LOC345930  | -1.51 |
| XM_372640    | LOC390734 | -1.51 | NM_014791 | MELK       | -1.5  |
| NM_002082    | GRK6      | -1.5  | NM_001571 | IRF3       | -1.5  |
| NM_020699    | P66BETA   | -1.5  | NM_004861 | GAL3ST1    | -1.5  |
| NM_000257    | MYH7      | -1.5  | NM_002333 | LRP3       | -1.5  |
| NM_000121    | EPOR      | -1.5  | NM_016112 | PKD2L1     | -1.5  |
| NM_021127    | PMAIP1    | -1.5  | NM_002455 | MTX1       | -1.5  |
| NM_006408    | AGR2      | -1.5  | NM_003314 | TTC1       | -1.5  |
| NM_004846    | EIF4EL3   | -1.5  | NM_015224 | RAP140     | -1.5  |
| NM_014026    | DCPS      | -1.5  | XM_372927 | TTC7A      | -1.5  |
| XM_372083    | KIAA1161  | -1.5  | NM_024032 | MGC3130    | -1.5  |
| NM_017647    | FTSJ3     | -1.5  | NM_145014 | FLJ32915   | -1.5  |
| NM_182582    | MGC34919  | -1.5  | XM_371492 | LOC388949  | -1.5  |
| XM_371715    | LOC389240 | -1.5  | NM_002756 | MAP2K3     | -1.49 |
| NM_006625    | FUSIP1    | -1.49 | NM_017534 | MYH2       | -1.49 |
| NM_014223    | NFYC      | -1.49 | NM_000588 | IL3        | -1.49 |
| NM_001999    | FBN2      | -1.49 | NM_012111 | AHSA1      | -1.49 |
| NM_004748    | CPR8      | -1.49 | NM_001025 | RPS23      | -1.49 |
| NM_016481    | C9ORF156  | -1.49 | NM_018114 | FLJ10496   | -1.49 |
| NM_024742    | FLJ13063  | -1.49 | NM_152338 | ZG16       | -1.49 |
| NM_058166    | TRIM6     | -1.49 | NM_138701 | C7ORF11    | -1.49 |
| XM_211287    | LOC283999 | -1.49 | NM_198083 | DHRS4L2    | -1.49 |
| NM_001001963 | OR2L8     | -1.49 | NM_016340 | RAPGEF6    | -1.48 |
| NM_004188    | GF11B     | -1.48 | NM_002316 | LMX1B      | -1.48 |
| NM_000402    | G6PD      | -1.48 | NM_001379 | DNMT1      | -1.48 |
| NM_012475    | USP21     | -1.48 | NM_021057 | IFNA7      | -1.48 |
| NM_016240    | SCARA3    | -1.48 | NM_001832 | CLPS       | -1.48 |
| NM_005545    | ISLR      | -1.48 | NM_003275 | TMOD1      | -1.48 |
| NM_004765    | BCL7C     | -1.48 | NM_006824 | EBNA1BP2   | -1.48 |
| NM_015681    | EPPB9     | -1.48 | NM_017426 | NUP54      | -1.48 |
| NM_018032    | LUC7L     | -1.48 | NM_025132 | PWDMP      | -1.48 |
| NM_022492    | FLJ12788  | -1.48 | NM_024297 | MGC2941    | -1.48 |
| NM_024573    | C6ORF211  | -1.48 | NM_032318 | HIATL2     | -1.48 |

|              |              |       |           |           |       |
|--------------|--------------|-------|-----------|-----------|-------|
| XM_058426    | FLJ00012     | -1.48 | XM_378712 | LOC146713 | -1.48 |
| XM_097886    | LOC150223    | -1.48 | NM_139177 | SLC39A11  | -1.48 |
| NM_207390    | FLJ45910     | -1.48 | XM_380069 | LOC402714 | -1.48 |
| XM_370714    | LOC387908    | -1.48 | XM_373690 | LOC388282 | -1.48 |
| NM_022158    | FN3K         | -1.47 | NM_002767 | PRPSAP2   | -1.47 |
| NM_000323    | RET          | -1.47 | NM_001482 | GATM      | -1.47 |
| NM_003879    | CFLAR        | -1.47 | NM_001202 | BMP4      | -1.47 |
| NM_000343    | SLC5A1       | -1.47 | NM_000097 | CPOX      | -1.47 |
| NM_017526    | OBRGRP       | -1.47 | NM_012409 | PRND      | -1.47 |
| NM_021014    | SSX3         | -1.47 | NM_007030 | P25       | -1.47 |
| NM_007252    | POU6F2       | -1.47 | NM_015139 | SLC35D1   | -1.47 |
| NM_015556    | SIPA1L1      | -1.47 | NM_018250 | FLJ10871  | -1.47 |
| NM_020204    | LHX9         | -1.47 | NM_030907 | MGC10731  | -1.47 |
| NM_033258    | GNG8         | -1.47 | NM_020461 | TUBGCP6   | -1.47 |
| NM_194250    | LOC91752     | -1.47 | NM_138572 | TBN       | -1.47 |
| XM_210022    | GARNL1       | -1.47 | NM_207482 | FLJ44048  | -1.47 |
| XM_371672    | LOC389168    | -1.47 | NM_001717 | BNC1      | -1.46 |
| NM_004824    | CDYL         | -1.46 | NM_003935 | TOP3B     | -1.46 |
| NM_002431    | MNAT1        | -1.46 | NM_002121 | HLA-DPB1  | -1.46 |
| NM_001566    | INPP4A       | -1.46 | NM_002256 | KISS1     | -1.46 |
| NM_001356    | DDX3X        | -1.46 | NM_002692 | POLE2     | -1.46 |
| NM_003574    | VAPA         | -1.46 | NM_003782 | B3GALT4   | -1.46 |
| NM_018146    | FLJ10581     | -1.46 | NM_024513 | FYCO1     | -1.46 |
| NM_032301    | FBXW9        | -1.46 | NM_022776 | OSBPL11   | -1.46 |
| XM_085433    | FLJ25404     | -1.46 | NM_138288 | C14ORF147 | -1.46 |
| XM_166659    | OTUD1        | -1.46 | XM_166747 | LOC219797 | -1.46 |
| XM_370716    | LOC387912    | -1.46 | XM_374354 | LOC390550 | -1.46 |
| NM_001006655 | DKFZP564J102 | -1.46 | NM_015178 | RHOBTB2   | -1.45 |
| NM_006917    | RXRG         | -1.45 | NM_000044 | AR        | -1.45 |
| NM_002273    | KRT8         | -1.45 | NM_000397 | CYBB      | -1.45 |
| NM_032667    | BSCL2        | -1.45 | NM_032489 | ACRBP     | -1.45 |
| NM_006979    | SLC39A7      | -1.45 | NM_005737 | ARL7      | -1.45 |
| NM_012451    | SYNGR4       | -1.45 | NM_207514 | FLJ20186  | -1.45 |
| NM_018196    | TMLHE        | -1.45 | NM_024164 | TPSB2     | -1.45 |
| NM_153204    | C21ORF90     | -1.45 | NM_178841 | RNF166    | -1.45 |
| NM_145276    | ZNF563       | -1.45 | NM_153263 | ZNF549    | -1.45 |
| XM_372759    | LOC390998    | -1.45 | XM_378908 | LOC400793 | -1.45 |
| XM_373354    | LOC392487    | -1.45 | NM_018216 | PANK4     | -1.44 |
| NM_000839    | GRM2         | -1.44 | NM_172373 | ELF1      | -1.44 |
| NM_001959    | EEF1B2       | -1.44 | NM_000961 | PTGIS     | -1.44 |
| NM_006313    | USP15        | -1.44 | NM_004977 | KCNC3     | -1.44 |
| NM_006121    | KRT1         | -1.44 | NM_001246 | ENTPD2    | -1.44 |
| NM_004116    | FKBP1B       | -1.44 | NM_002557 | OVGP1     | -1.44 |
| NM_018102    | ZNF334       | -1.44 | NM_173490 | LOC134285 | -1.44 |
| NM_153345    | FLJ90586     | -1.44 | NM_152680 | FLJ32028  | -1.44 |
| NM_178034    | PLA2G4D      | -1.44 | XM_210860 | LOC283034 | -1.44 |

|           |           |       |           |           |       |
|-----------|-----------|-------|-----------|-----------|-------|
| XM_376558 | LOC401293 | -1.44 | XM_379605 | LOC401477 | -1.44 |
| NM_023067 | FOXL2     | -1.43 | NM_014140 | SMARCAL1  | -1.43 |
| NM_006241 | PPP1R2    | -1.43 | NM_012163 | FBXL9     | -1.43 |
| NM_001963 | EGF       | -1.43 | NM_003650 | CST7      | -1.43 |
| NM_001238 | CCNE1     | -1.43 | NM_004746 | DLGAP1    | -1.43 |
| NM_014890 | DOC1      | -1.43 | NM_000285 | PEPD      | -1.43 |
| NM_058222 | TECTB     | -1.43 | XM_042841 | RAFTLIN   | -1.43 |
| XM_370754 | THTPA     | -1.43 | NM_032522 | MGC2629   | -1.43 |
| NM_173847 | SPACA3    | -1.43 | NM_152466 | FLJ25168  | -1.43 |
| NM_152427 | CFLP1     | -1.43 | NM_173796 | MGC24125  | -1.43 |
| NM_175889 | FLJ37045  | -1.43 | XM_379355 | LOC340074 | -1.43 |
| XM_371326 | LOC388714 | -1.43 | NM_002110 | HCK       | -1.42 |
| NM_006711 | RNPS1     | -1.42 | NM_007312 | HYAL1     | -1.42 |
| NM_003124 | SPR       | -1.42 | NM_003337 | UBE2B     | -1.42 |
| NM_020244 | CHPT1     | -1.42 | NM_032166 | TREX1     | -1.42 |
| NM_002428 | MMP15     | -1.42 | NM_003738 | PTCH2     | -1.42 |
| NM_004881 | TP53I3    | -1.42 | NM_002043 | GABRR2    | -1.42 |
| NM_000587 | C7        | -1.42 | NM_001724 | BPGM      | -1.42 |
| NM_006474 | T1A-2     | -1.42 | NM_017590 | ROXAN     | -1.42 |
| NM_014471 | SPINK4    | -1.42 | NM_015721 | GEMIN4    | -1.42 |
| NM_025002 | C6ORF208  | -1.42 | XM_034262 | KIAA1727  | -1.42 |
| NM_033119 | NKD1      | -1.42 | NM_018100 | EFHC1     | -1.42 |
| XM_036218 | ZNF506    | -1.42 | NM_203411 | LOC92162  | -1.42 |
| NM_058230 | ZNF354B   | -1.42 | NM_080870 | DPCR1     | -1.42 |
| XM_378667 | LOC147004 | -1.42 | NM_177965 | LOC157657 | -1.42 |
| NM_139246 | C9ORF97   | -1.42 | NM_145062 | C6ORF113  | -1.42 |
| NM_152723 | FLJ38159  | -1.42 | NM_177550 | SLC13A5   | -1.42 |
| NM_199182 | IMAA      | -1.42 | XM_290866 | LOC339377 | -1.42 |
| XM_292624 | LOC342600 | -1.42 | XM_059672 | LOC133874 | -1.42 |
| XM_374016 | LOC389055 | -1.42 | XM_379339 | LOC401199 | -1.42 |
| XM_378316 | LOC399959 | -1.42 | NM_004857 | AKAP5     | -1.41 |
| NM_002446 | MAP3K10   | -1.41 | NM_018971 | GPR27     | -1.41 |
| NM_024507 | KREMEN2   | -1.41 | XM_166103 | DNA2L     | -1.41 |
| NM_003521 | HIST1H2BM | -1.41 | NM_003766 | BECN1     | -1.41 |
| NM_174902 | LOC143458 | -1.41 | NM_153705 | MGC33424  | -1.41 |
| NM_021649 | TIRP      | -1.41 | NM_206921 | C6ORF204  | -1.41 |
| XM_063481 | LOC123103 | -1.41 | XM_291857 | LOC341098 | -1.41 |
| XM_376269 | LOC401089 | -1.41 | XM_372632 | LOC390714 | -1.41 |
| NM_025164 | KIAA0999  | -1.4  | NM_000683 | ADRA2C    | -1.4  |
| NM_153002 | GPR156    | -1.4  | NM_005293 | GPR20     | -1.4  |
| NM_001087 | AAMP      | -1.4  | NM_016223 | PACSIN3   | -1.4  |
| NM_004139 | LBP       | -1.4  | NM_006058 | TNIP1     | -1.4  |
| NM_006024 | TAX1BP1   | -1.4  | NM_016427 | TCEB3B    | -1.4  |
| NM_013243 | SCG3      | -1.4  | NM_001719 | BMP7      | -1.4  |
| NM_002336 | LRP6      | -1.4  | NM_152703 | C7orf6    | -1.4  |
| NM_002188 | IL13      | -1.4  | NM_005132 | REC8L1    | -1.4  |

|              |           |       |              |           |       |
|--------------|-----------|-------|--------------|-----------|-------|
| NM_005218    | DEFB1     | -1.4  | NM_018714    | COG1      | -1.4  |
| NM_014830    | ZBTB39    | -1.4  | NM_019850    | NGEF      | -1.4  |
| NM_015871    | ZNF593    | -1.4  | NM_015893    | PRH       | -1.4  |
| NM_020426    | LOC57151  | -1.4  | NM_025019    | TUBA4     | -1.4  |
| NM_025084    | FLJ22795  | -1.4  | NM_030964    | SPRY4     | -1.4  |
| NM_033404    | KNDC1     | -1.4  | NM_145044    | ZNF501    | -1.4  |
| NM_182525    | FLJ32770  | -1.4  | NM_199280    | LOC165186 | -1.4  |
| NM_153231    | ZNF550    | -1.4  | XM_290463    | FAM22A    | -1.4  |
| XM_378544    | LOC283682 | -1.4  | XM_209563    | LOC285311 | -1.4  |
| XM_293412    | LOC347544 | -1.4  | XM_290547    | LOC338734 | -1.4  |
| XM_208563    | LOC283202 | -1.4  | XM_379184    | LOC401059 | -1.4  |
| XM_373616    | LOC388073 | -1.4  | NM_001004336 | FLJ90757  | -1.4  |
| NM_016507    | CRK7      | -1.39 | NM_003610    | RAE1      | -1.39 |
| NM_004869    | VPS4B     | -1.39 | NM_014267    | SMAP      | -1.39 |
| NM_018025    | GPATC1    | -1.39 | NM_018665    | DDX43     | -1.39 |
| NM_022346    | HCAP-G    | -1.39 | NM_014801    | FLJ11383  | -1.39 |
| NM_138412    | RDH13     | -1.39 | XM_166420    | PHACTR1   | -1.39 |
| NM_198501    | FLJ42461  | -1.39 | XM_063315    | LOC122748 | -1.39 |
| XM_170840    | LOC256223 | -1.39 | NM_003113    | SP100     | -1.38 |
| NM_001422    | ELF5      | -1.38 | NM_003470    | USP7      | -1.38 |
| NM_017912    | HERC6     | -1.38 | NM_002262    | KLRD1     | -1.38 |
| NM_000688    | ALAS1     | -1.38 | NM_001302    | CORT      | -1.38 |
| NM_005322    | HIST1H1B  | -1.38 | NM_015909    | NAG       | -1.38 |
| NM_020817    | KIAA1407  | -1.38 | NM_025205    | EG1       | -1.38 |
| NM_024933    | FLJ12056  | -1.38 | NM_032531    | KIRREL3   | -1.38 |
| NM_138342    | LOC89944  | -1.38 | NM_205543    | ALS2CR16  | -1.38 |
| NM_152421    | MGC20262  | -1.38 | NM_153030    | FLJ31958  | -1.38 |
| NM_152598    | FLJ35757  | -1.38 | NM_199129    | KUA       | -1.38 |
| NM_001001711 | DDI1      | -1.38 | NM_052841    | STK22C    | -1.37 |
| NM_000910    | NPY2R     | -1.37 | NM_016084    | RASD1     | -1.37 |
| NM_001941    | DSC3      | -1.37 | NM_005531    | IFI16     | -1.37 |
| NM_013261    | PPARGC1A  | -1.37 | NM_006191    | PA2G4     | -1.37 |
| NM_004001    | FCGR2B    | -1.37 | NM_001148    | ANK2      | -1.37 |
| NM_001000    | RPL39     | -1.37 | NM_003527    | HIST1H2BO | -1.37 |
| NM_017742    | ZCCHC2    | -1.37 | NM_017673    | C10RF26   | -1.37 |
| NM_018393    | FLJ11336  | -1.37 | NM_021944    | C14ORF93  | -1.37 |
| NM_024741    | ZNF408    | -1.37 | NM_024845    | FLJ14154  | -1.37 |
| XM_376094    | LOC90499  | -1.37 | NM_052970    | HSPA12B   | -1.37 |
| NM_144612    | LOXHD1    | -1.37 | NM_144703    | C20ORF40  | -1.37 |
| NM_198572    | MGC61633  | -1.37 | NM_207447    | UNQ9370   | -1.37 |
| XM_209753    | LOC285770 | -1.37 | XM_376320    | LOC401136 | -1.37 |
| NM_001005483 | OR4K5     | -1.37 | NM_021629    | GNB4      | -1.36 |
| NM_054032    | MRGX4     | -1.36 | NM_001049    | SSTR1     | -1.36 |
| NM_015450    | POT1      | -1.36 | NM_002874    | RAD23B    | -1.36 |
| NM_054113    | CIB3      | -1.36 | NM_152490    | MGC39558  | -1.36 |
| NM_004397    | DDX6      | -1.36 | NM_005543    | INSL3     | -1.36 |



|           |               |       |           |           |       |
|-----------|---------------|-------|-----------|-----------|-------|
| NM_002173 | IFNA16        | -1.36 | NM_003862 | FGF18     | -1.36 |
| NM_000396 | CTSK          | -1.36 | NM_015991 | C1QA      | -1.36 |
| NM_021123 | GAGE7         | -1.36 | NM_005898 | M11S1     | -1.36 |
| NM_006760 | UPK2          | -1.36 | NM_002904 | RDBP      | -1.36 |
| NM_006032 | CPNE6         | -1.36 | NM_018203 | FLJ10748  | -1.36 |
| NM_033225 | CSMD1         | -1.36 | NM_032705 | MGC14801  | -1.36 |
| NM_033510 | DISP2         | -1.36 | NM_144674 | FLJ32871  | -1.36 |
| XM_088551 | KIAA2026      | -1.36 | NM_181774 | SLC36A3   | -1.36 |
| NM_182613 | FLJ33915      | -1.36 | XM_378861 | LOC400752 | -1.36 |
| NM_002106 | H2AFZ         | -1.35 | NM_032580 | HES7      | -1.35 |
| NM_006048 | UBE4B         | -1.35 | NM_000746 | CHRNA7    | -1.35 |
| NM_172369 | C1QG          | -1.35 | NM_002318 | LOXL2     | -1.35 |
| NM_003546 | HIST1H4L      | -1.35 | NM_004902 | RNPC2     | -1.35 |
| NM_152892 | DKFZP434K1815 | -1.35 | XM_373033 | LOC391701 | -1.35 |
| NM_001700 | AZU1          | -1.34 | NM_006575 | MAP4K5    | -1.34 |
| NM_001837 | CCR3          | -1.34 | NM_006637 | OR511     | -1.34 |
| NM_014921 | LPHN1         | -1.34 | NM_006265 | RAD21     | -1.34 |
| NM_002914 | RFC2          | -1.34 | NM_022171 | TCTA      | -1.34 |
| NM_002413 | MGST2         | -1.34 | NM_015466 | PTPN23    | -1.34 |
| NM_000808 | GABRA3        | -1.34 | NM_007121 | NR1H2     | -1.34 |
| NM_004269 | CRSP8         | -1.34 | NM_001887 | CRYBB1    | -1.34 |
| NM_005850 | SF3B4         | -1.34 | NM_007062 | PWP1      | -1.34 |
| NM_014019 | HSPC009       | -1.34 | NM_016039 | C14ORF166 | -1.34 |
| NM_020117 | LARS          | -1.34 | NM_018018 | SLC38A4   | -1.34 |
| NM_022138 | SMOC2         | -1.34 | NM_024805 | C18ORF22  | -1.34 |
| NM_033515 | ARHGAP18      | -1.34 | NM_174976 | ZDHHC22   | -1.34 |
| XM_043500 | LOC92196      | -1.34 | XM_371268 | LOC388649 | -1.34 |
| XM_379161 | LOC401037     | -1.34 | XM_374276 | LOC389676 | -1.34 |
| XM_373605 | LOC388010     | -1.34 | XM_373372 | LOC392546 | -1.34 |
| NM_007199 | IRAK3         | -1.33 | NM_021733 | TSKS      | -1.33 |
| NM_019041 | MTRF1L        | -1.33 | NM_003365 | UQCRC1    | -1.33 |
| NM_003477 | PDHX          | -1.33 | NM_002639 | SERPINB5  | -1.33 |
| NM_002123 | HLA-DQB1      | -1.33 | NM_004494 | HDGF      | -1.33 |
| NM_001330 | CTF1          | -1.33 | NM_016610 | TLR8      | -1.33 |
| NM_145061 | C13ORF3       | -1.33 | NM_006442 | DRAP1     | -1.33 |
| NM_002161 | IARS          | -1.33 | NM_021012 | KCNJ12    | -1.33 |
| NM_003142 | SSB           | -1.33 | NM_199328 | CLDN8     | -1.33 |
| NM_004294 | MTRF1         | -1.33 | NM_004816 | C9ORF61   | -1.33 |
| NM_007372 | DDX42         | -1.33 | NM_015201 | BOP1      | -1.33 |
| NM_017773 | LAX           | -1.33 | NM_017839 | FLJ20481  | -1.33 |
| NM_018273 | FLJ10922      | -1.33 | NM_024706 | FLJ13479  | -1.33 |
| NM_025240 | B7H3          | -1.33 | XM_056298 | KIAA1889  | -1.33 |
| XM_371015 | USP43         | -1.33 | NM_152329 | PPIL5     | -1.33 |
| NM_144704 | FLJ30473      | -1.33 | XM_088118 | FAM10A7   | -1.33 |
| NM_182588 | DKFZP686P0288 | -1.33 | NM_207416 | FLJ44082  | -1.33 |
| NM_003525 | HIST1H2BI     | -1.33 | XM_086616 | LOC149643 | -1.33 |

|           |           |       |              |           |       |
|-----------|-----------|-------|--------------|-----------|-------|
| XM_211837 | LOC285307 | -1.33 | XM_086637    | LOC149709 | -1.33 |
| XM_379177 | LOC401053 | -1.33 | XM_372521    | LOC390466 | -1.33 |
| XM_373800 | LOC388528 | -1.33 | NM_001005519 | OR6C68    | -1.33 |
| NM_025197 | CDK5RAP3  | -1.32 | NM_001838    | CCR7      | -1.32 |
| NM_014278 | APG-1     | -1.32 | NM_006761    | YWHAE     | -1.32 |
| NM_004959 | NR5A1     | -1.32 | NM_004603    | STX1A     | -1.32 |
| NM_052951 | DNTTIP1   | -1.32 | NM_018010    | ESRRBL1   | -1.32 |
| NM_003630 | PEX3      | -1.32 | NM_006170    | NOL1      | -1.32 |
| NM_004888 | ATP6V1G1  | -1.32 | XM_042833    | ZNF609    | -1.32 |
| NM_022109 | CDW92     | -1.32 | NM_014394    | GHITM     | -1.32 |
| NM_024603 | FLJ11588  | -1.32 | NM_030628    | KIAA1698  | -1.32 |
| NM_033128 | SCIN      | -1.32 | NM_207312    | LOC112714 | -1.32 |
| NM_144614 | MBD3L2    | -1.32 | XM_085634    | LOC146909 | -1.32 |
| NM_178483 | C20ORF79  | -1.32 | XM_094794    | DACT2     | -1.32 |
| NM_144977 | FAM31B    | -1.32 | XM_167709    | C10ORF38  | -1.32 |
| XM_373030 | LOC285556 | -1.32 | NM_152286    | C9ORF111  | -1.32 |
| XM_210501 | LOC286528 | -1.32 | XM_372625    | LOC390704 | -1.32 |
| NM_006209 | ENPP2     | -1.31 | NM_005388    | PDCL      | -1.31 |
| NM_002873 | RAD17     | -1.31 | NM_006897    | HOXC9     | -1.31 |
| NM_177400 | NKX6-2    | -1.31 | NM_000458    | TCF2      | -1.31 |
| NM_015570 | AUTS2     | -1.31 | NM_000106    | CYP2D6    | -1.31 |
| NM_003719 | PDE8B     | -1.31 | NM_001663    | ARF6      | -1.31 |
| NM_019887 | DIABLO    | -1.31 | NM_001098    | ACO2      | -1.31 |
| NM_001863 | COX6B1    | -1.31 | NM_000767    | CYP2B6    | -1.31 |
| NM_014429 | MORC      | -1.31 | NM_198795    | TDRD1     | -1.31 |
| XM_049952 | FLJ23529  | -1.31 | XM_095991    | C9ORF81   | -1.31 |
| NM_032664 | FUT10     | -1.31 | NM_138456    | MGC20410  | -1.31 |
| NM_152339 | MGC26885  | -1.31 | NM_182534    | FLJ23703  | -1.31 |
| XM_379371 | LOC285626 | -1.31 | XM_172860    | LOC255649 | -1.31 |
| XM_371643 | LOC389124 | -1.31 | XM_372952    | LOC391427 | -1.31 |
| XM_372654 | LOC390760 | -1.31 | XM_372202    | LOC389844 | -1.31 |
| NM_005184 | CALM3     | -1.3  | NM_006875    | PIM2      | -1.3  |
| NM_018980 | TAS2R5    | -1.3  | NM_003411    | ZFY       | -1.3  |
| NM_000383 | AIRE      | -1.3  | NM_020385    | XPMC2H    | -1.3  |
| NM_001692 | ATP6V1B1  | -1.3  | NM_000660    | TGFB1     | -1.3  |
| NM_021625 | TRPV4     | -1.3  | NM_006837    | COPS5     | -1.3  |
| NM_001759 | CCND2     | -1.3  | NM_031412    | GABARAPL1 | -1.3  |
| NM_033084 | FANCD2    | -1.3  | NM_001371    | DNAH8     | -1.3  |
| XM_372195 | AGRN      | -1.3  | NM_013280    | FLRT1     | -1.3  |
| NM_014604 | TAX1BP3   | -1.3  | NM_018075    | FLJ10375  | -1.3  |
| NM_017871 | FLJ20542  | -1.3  | NM_031443    | CCM2      | -1.3  |
| NM_031453 | C10ORF45  | -1.3  | NM_178494    | FLJ40125  | -1.3  |
| NM_152434 | CWF19L2   | -1.3  | NM_176890    | TAS2R50   | -1.3  |
| XM_039721 | LOC91632  | -1.3  | XM_087182    | LOC151363 | -1.3  |
| XM_372035 | LOC389643 | -1.3  | XM_373572    | LOC387941 | -1.3  |
| NM_018638 | EKI1      | -1.29 | NM_024800    | NEK11     | -1.29 |

|           |           |       |              |           |       |
|-----------|-----------|-------|--------------|-----------|-------|
| NM_005647 | TBL1X     | -1.29 | NM_005025    | SERPINI1  | -1.29 |
| NM_004505 | USP6      | -1.29 | NM_013371    | IL19      | -1.29 |
| NM_004831 | CRSP7     | -1.29 | NM_002555    | SLC22A18  | -1.29 |
| NM_006606 | RBBP9     | -1.29 | NM_005335    | HCLS1     | -1.29 |
| NM_001012 | RPS8      | -1.29 | NM_014749    | KIAA0586  | -1.29 |
| NM_014447 | ARFIP1    | -1.29 | NM_021208    | C9ORF27   | -1.29 |
| XM_371286 | MGC45731  | -1.29 | NM_018593    | SLC16A10  | -1.29 |
| NM_145033 | C21ORF100 | -1.29 | NM_207358    | LOC339789 | -1.29 |
| NM_207391 | FLJ45744  | -1.29 | NM_199339    | LOC374768 | -1.29 |
| NM_203348 | MGC50722  | -1.29 | XM_292021    | LOC341346 | -1.29 |
| XM_373746 | LOC388416 | -1.29 | NM_005787    | ALG3      | -1.28 |
| NM_002388 | MCM3      | -1.28 | NM_014369    | PTPN18    | -1.28 |
| NM_015532 | GRINL1A   | -1.28 | NM_005547    | IVL       | -1.28 |
| NM_014041 | SPC12     | -1.28 | NM_016380    | LOC51212  | -1.28 |
| NM_016497 | MRPL51    | -1.28 | NM_020144    | PAPOLB    | -1.28 |
| NM_024567 | FLJ21616  | -1.28 | NM_030891    | LRRC3     | -1.28 |
| NM_207345 | UNQ9341   | -1.28 | NM_182591    | FLJ37673  | -1.28 |
| NM_178174 | TREML1    | -1.28 | NM_017437    | CPSF2     | -1.28 |
| XM_063308 | LOC122740 | -1.28 | XM_059923    | LOC137829 | -1.28 |
| XM_211174 | LOC283710 | -1.28 | XM_091809    | LOC147468 | -1.28 |
| XM_089863 | LOC143502 | -1.28 | XM_377594    | LOC401954 | -1.28 |
| XM_372778 | LOC391035 | -1.28 | XM_379797    | LOC402469 | -1.28 |
| XM_379998 | LOC402644 | -1.28 | XM_372030    | LOC389633 | -1.28 |
| XM_378358 | LOC400041 | -1.28 | NM_001004136 | OR2T2     | -1.28 |
| NM_005881 | BCKDK     | -1.27 | NM_021027    | UGT1A9    | -1.27 |
| NM_002213 | ITGB5     | -1.27 | XM_291055    | KIAA1268  | -1.27 |
| NM_000135 | FANCA     | -1.27 | NM_176820    | NALP9     | -1.27 |
| NM_005212 | CSN3      | -1.27 | NM_002804    | PSMC3     | -1.27 |
| NM_005715 | UST       | -1.27 | NM_006638    | RPP40     | -1.27 |
| NM_014316 | CARHSP1   | -1.27 | NM_018981    | DNAJC10   | -1.27 |
| XM_027307 | PLEKHG1   | -1.27 | NM_022160    | DMRTA1    | -1.27 |
| NM_052948 | SNX26     | -1.27 | NM_138983    | OLIG1     | -1.27 |
| NM_213597 | LOC124751 | -1.27 | NM_153329    | MGC10204  | -1.27 |
| NM_080825 | C20ORF144 | -1.27 | XM_370651    | FLJ32810  | -1.27 |
| NM_201286 | USP51     | -1.27 | NM_153699    | GSTA5     | -1.27 |
| NM_145299 | LOC200383 | -1.27 | NM_152750    | FLJ23834  | -1.27 |
| NM_205852 | UNQ5782   | -1.27 | NM_178349    | LCE1B     | -1.27 |
| XM_373073 | LOC391761 | -1.27 | XM_378766    | LOC400669 | -1.27 |
| NM_004148 | NINJ1     | -1.26 | NM_014521    | SH3BP4    | -1.26 |
| NM_003012 | SFRP1     | -1.26 | NM_003653    | COPS3     | -1.26 |
| NM_033377 | CGB1      | -1.26 | NM_018265    | FLJ10901  | -1.26 |
| NM_002101 | GYPC      | -1.26 | NM_021967    | SERF1A    | -1.26 |
| NM_014232 | VAMP2     | -1.26 | NM_004718    | COX7A2L   | -1.26 |
| NM_012469 | C20ORF14  | -1.26 | NM_018106    | ZDHHC4    | -1.26 |
| NM_018135 | MRPS18A   | -1.26 | NM_018142    | FLJ10569  | -1.26 |
| NM_017707 | UPLC1     | -1.26 | NM_018397    | CHDH      | -1.26 |

|              |           |       |           |               |       |
|--------------|-----------|-------|-----------|---------------|-------|
| NM_017751    | FLJ20297  | -1.26 | NM_080668 | CDCA5         | -1.26 |
| NM_052956    | BUCS1     | -1.26 | XM_059776 | FKBP1C        | -1.26 |
| NM_144775    | SMCR8     | -1.26 | NM_139176 | NALP7         | -1.26 |
| NM_153453    | VGLL2     | -1.26 | NM_198853 | TRIM50C       | -1.26 |
| XM_114129    | LOC200159 | -1.26 | XM_293868 | LOC345537     | -1.26 |
| XM_378865    | LOC400756 | -1.26 | XM_379267 | LOC401134     | -1.26 |
| XM_379892    | LOC402567 | -1.26 | NM_002418 | MLN           | -1.25 |
| NM_000070    | CAPN3     | -1.25 | NM_001614 | ACTG1         | -1.25 |
| NM_003139    | SRPR      | -1.25 | NM_003239 | TGFB3         | -1.25 |
| NM_000501    | ELN       | -1.25 | NM_001853 | COL9A3        | -1.25 |
| NM_014515    | CNOT2     | -1.25 | NM_005986 | SOX1          | -1.25 |
| NM_006945    | SPRR2B    | -1.25 | NM_014648 | DZIP3         | -1.25 |
| NM_012254    | SLC27A5   | -1.25 | NM_016338 | IPO11         | -1.25 |
| NM_025265    | MGC2776   | -1.25 | NM_025193 | HSD3B7        | -1.25 |
| NM_032556    | IL1F10    | -1.25 | XM_064856 | LOC125893     | -1.25 |
| NM_080834    | C20ORF152 | -1.25 | NM_177986 | DSG4          | -1.25 |
| NM_139250    | CTAG1A    | -1.25 | NM_152756 | AVO3          | -1.25 |
| XM_378985    | LOC284751 | -1.25 | XM_058611 | LOC150928     | -1.25 |
| XM_291643    | LOC339562 | -1.25 | XM_116396 | LOC202227     | -1.25 |
| XM_379840    | LOC402509 | -1.25 | XM_371176 | LOC388550     | -1.25 |
| NM_001005480 | OR2A2     | -1.25 | NM_000916 | OXTR          | -1.24 |
| NM_016358    | IRX4      | -1.24 | NM_000856 | GUCY1A3       | -1.24 |
| NM_003701    | TNFSF11   | -1.24 | NM_175852 | DKFZP451J0118 | -1.24 |
| NM_003185    | TAF4      | -1.24 | NM_002726 | PREP          | -1.24 |
| NM_004882    | CIR       | -1.24 | NM_012101 | TRIM29        | -1.24 |
| NM_015652    | C10ORF12  | -1.24 | NM_017943 | FBXO34        | -1.24 |
| NM_021216    | ZNF71     | -1.24 | NM_024600 | FLJ20898      | -1.24 |
| NM_032550    | KIAA1914  | -1.24 | NM_207330 | LOC152519     | -1.24 |
| NM_173543    | FLJ32844  | -1.24 | NM_173815 | FLJ37464      | -1.24 |
| XM_294854    | LOC339209 | -1.24 | XM_293976 | LOC340120     | -1.24 |
| XM_376549    | LOC401280 | -1.24 | XM_372019 | LOC389618     | -1.24 |
| XM_377947    | LOC402281 | -1.24 | XM_373477 | LOC387715     | -1.24 |
| NM_004333    | BRAF      | -1.23 | NM_004126 | GNG11         | -1.23 |
| NM_001834    | CLTB      | -1.23 | NM_012090 | MACF1         | -1.23 |
| NM_144770    | RBM11     | -1.23 | NM_138693 | KLF14         | -1.23 |
| NM_030767    | AKNA      | -1.23 | NM_015446 | ELYS          | -1.23 |
| NM_003749    | IRS2      | -1.23 | NM_001671 | ASGR1         | -1.23 |
| NM_000183    | HADHB     | -1.23 | XM_166125 | PALD          | -1.23 |
| NM_003186    | TAGLN     | -1.23 | NM_007363 | NONO          | -1.23 |
| NM_003249    | THOP1     | -1.23 | NM_014146 | WBSCR5        | -1.23 |
| NM_006077    | CBARA1    | -1.23 | NM_015037 | KIAA0913      | -1.23 |
| NM_021025    | TLX3      | -1.23 | NM_017911 | C22ORF8       | -1.23 |
| NM_021189    | IGSF4B    | -1.23 | NM_022450 | RHBDF1        | -1.23 |
| NM_144722    | FLJ23577  | -1.23 | NM_032817 | FLJ14641      | -1.23 |
| NM_138334    | SBBI54    | -1.23 | NM_153254 | FLJ36119      | -1.23 |
| NM_152776    | MGC40579  | -1.23 | XM_370777 | LOC374569     | -1.23 |

|              |            |       |           |               |       |
|--------------|------------|-------|-----------|---------------|-------|
| NM_198699    | KRTAP18-12 | -1.23 | XM_291991 | LOC387870     | -1.23 |
| XM_059166    | LOC127602  | -1.23 | XM_070619 | LOC137814     | -1.23 |
| XM_376464    | LOC401233  | -1.23 | XM_377837 | LOC402170     | -1.23 |
| XM_373538    | LOC387869  | -1.23 | NM_033118 | MYLK2         | -1.22 |
| NM_005972    | PPYR1      | -1.22 | NM_022098 | LOC63929      | -1.22 |
| NM_004761    | RGL2       | -1.22 | NM_000201 | ICAM1         | -1.22 |
| NM_022054    | KCNK13     | -1.22 | NM_018298 | MCOLN3        | -1.22 |
| NM_005024    | SERPINB10  | -1.22 | NM_002817 | PSMD13        | -1.22 |
| XM_038520    | KIAA0542   | -1.22 | NM_006413 | RPP30         | -1.22 |
| NM_015132    | SNX13      | -1.22 | XM_375762 | NTNG1         | -1.22 |
| XM_027045    | CUTL2      | -1.22 | NM_016014 | C9ORF77       | -1.22 |
| NM_020317    | NPD014     | -1.22 | NM_024889 | C10ORF81      | -1.22 |
| NM_033111    | LOC88523   | -1.22 | NM_153214 | FLJ37440      | -1.22 |
| NM_152488    | FLJ32833   | -1.22 | NM_133473 | ZNF431        | -1.22 |
| NM_173667    | FLJ37543   | -1.22 | XM_292943 | NAP5          | -1.22 |
| XM_379507    | LOC401385  | -1.22 | XM_379934 | LOC402600     | -1.22 |
| NM_001001964 | OR2T11     | -1.22 | NM_139021 | ERK8          | -1.21 |
| NM_015129    | 38961      | -1.21 | NM_032638 | GATA2         | -1.21 |
| NM_018127    | ELAC2      | -1.21 | NM_017990 | PDPR          | -1.21 |
| NM_176880    | TRA16      | -1.21 | NM_021485 | RPS6KB2       | -1.21 |
| NM_016315    | GULP1      | -1.21 | NM_005550 | KIFC3         | -1.21 |
| NM_000186    | HF1        | -1.21 | NM_012420 | IFIT5         | -1.21 |
| NM_002367    | MAGEB4     | -1.21 | NM_015462 | DKFZP586L0724 | -1.21 |
| XM_059095    | FNBP2      | -1.21 | NM_012473 | TXN2          | -1.21 |
| NM_015603    | CCDC9      | -1.21 | NM_016052 | CGI-115       | -1.21 |
| NM_016397    | TH1L       | -1.21 | NM_022457 | RFWD2         | -1.21 |
| NM_080603    | ZSWIM1     | -1.21 | NM_174959 | LOC136306     | -1.21 |
| NM_145282    | LOC153328  | -1.21 | NM_181847 | AMIGO2        | -1.21 |
| NM_003510    | HIST1H2AK  | -1.21 | XM_170659 | LOC254439     | -1.21 |
| XM_375816    | LOC400792  | -1.21 | XM_378799 | LOC400691     | -1.21 |
| XM_373779    | LOC388480  | -1.21 | NM_003685 | KHSRP         | -1.2  |
| NM_016269    | LEF1       | -1.2  | NM_006291 | TNFAIP2       | -1.2  |
| NM_006597    | HSPA8      | -1.2  | NM_025090 | USP36         | -1.2  |
| NM_006462    | C20ORF18   | -1.2  | NM_002835 | PTPN12        | -1.2  |
| NM_003269    | NR2E1      | -1.2  | NM_003790 | TNFRSF25      | -1.2  |
| NM_005450    | NOG        | -1.2  | NM_006887 | ZFP36L2       | -1.2  |
| NM_182549    | HLA-DQB2   | -1.2  | NM_002887 | RARS          | -1.2  |
| NM_014666    | ENTH       | -1.2  | XM_084529 | KIAA0298      | -1.2  |
| NM_006090    | CEPT1      | -1.2  | NM_006817 | C12ORF8       | -1.2  |
| NM_014315    | KLHDC2     | -1.2  | NM_014028 | OSTM1         | -1.2  |
| NM_018161    | NADSYN1    | -1.2  | NM_018923 | PCDHGB2       | -1.2  |
| NM_020135    | WRNIP1     | -1.2  | NM_020951 | ZNF529        | -1.2  |
| NM_031919    | CSDUFD1    | -1.2  | NM_015242 | CENTD2        | -1.2  |
| NM_133450    | KIAA1977   | -1.2  | NM_152418 | FLJ35775      | -1.2  |
| XM_293911    | ANKRD31    | -1.2  | NM_181624 | KRTAP23-1     | -1.2  |
| NM_198533    | SCDR10     | -1.2  | XM_373821 | LOC388586     | -1.2  |

|              |              |       |              |           |       |
|--------------|--------------|-------|--------------|-----------|-------|
| XM_372114    | LOC389757    | -1.2  | XM_374646    | LOC392979 | -1.2  |
| XM_374920    | LOC399940    | -1.2  | XM_375007    | LOC400093 | -1.2  |
| XM_372559    | LOC390558    | -1.2  | XM_370833    | LOC388076 | -1.2  |
| XM_378639    | LOC400567    | -1.2  | NM_004197    | STK19     | -1.19 |
| NM_005451    | PDLIM7       | -1.19 | NM_004427    | PHC2      | -1.19 |
| NM_003146    | SSRP1        | -1.19 | NM_002500    | NEUROD1   | -1.19 |
| NM_018584    | CAMKIINALPHA | -1.19 | NM_004574    | PNUTL2    | -1.19 |
| NM_013269    | LLT1         | -1.19 | NM_012226    | P2RX2     | -1.19 |
| NM_006920    | SCN1A        | -1.19 | NM_007051    | FAF1      | -1.19 |
| NM_000517    | HBA2         | -1.19 | NM_014486    | AD7C-NTP  | -1.19 |
| NM_004175    | SNRPD3       | -1.19 | NM_006672    | SLC22A7   | -1.19 |
| NM_015554    | GLCE         | -1.19 | NM_012143    | TFIP11    | -1.19 |
| NM_012257    | HBP1         | -1.19 | NM_016396    | HSPC129   | -1.19 |
| NM_020750    | XPO5         | -1.19 | NM_032431    | HRD1      | -1.19 |
| NM_138392    | LOC92799     | -1.19 | NM_178540    | MGC48915  | -1.19 |
| XM_168073    | LOC221344    | -1.19 | XM_379097    | LOC400957 | -1.19 |
| XM_374013    | LOC389048    | -1.19 | XM_372468    | LOC390338 | -1.19 |
| NM_001005471 | OR2T6        | -1.19 | NM_001001790 | C9ORF105  | -1.19 |
| NM_018401    | STK32B       | -1.18 | NM_002469    | MYF6      | -1.18 |
| NM_002254    | KIF3C        | -1.18 | NM_173043    | IL18BP    | -1.18 |
| NM_002373    | MAP1A        | -1.18 | NM_005086    | SSPN      | -1.18 |
| NM_017588    | WDR5         | -1.18 | NM_006189    | OMP       | -1.18 |
| NM_005381    | NCL          | -1.18 | NM_001021    | RPS17     | -1.18 |
| NM_182795    | NPM2         | -1.18 | NM_006663    | RAI       | -1.18 |
| NM_014474    | SMPDL3B      | -1.18 | NM_016102    | TRIM17    | -1.18 |
| NM_014582    | OBP2A        | -1.18 | NM_032946    | NXF5      | -1.18 |
| NM_020861    | ZBTB2        | -1.18 | NM_024787    | RNF122    | -1.18 |
| XM_031009    | LOC90342     | -1.18 | XM_371079    | FBF1      | -1.18 |
| XM_375558    | KIAA1881     | -1.18 | NM_138789    | LOC120379 | -1.18 |
| XM_067585    | LOC131873    | -1.18 | NM_175733    | LOC143425 | -1.18 |
| NM_206893    | MS4A10       | -1.18 | NM_198565    | UNQ3030   | -1.18 |
| XM_379479    | LOC401317    | -1.18 | XM_380143    | LOC402592 | -1.18 |
| XM_379692    | LOC401574    | -1.18 | XM_380129    | LOC402564 | -1.18 |
| NM_004203    | PKMYT1       | -1.17 | NM_003668    | MAPKAPK5  | -1.17 |
| NM_003953    | MPZL1        | -1.17 | NM_006465    | ARID3B    | -1.17 |
| NM_023918    | TAS2R8       | -1.17 | NM_000597    | IGFBP2    | -1.17 |
| NM_002588    | PCDHGC3      | -1.17 | NM_000296    | PKD1      | -1.17 |
| NM_001451    | FOXF1        | -1.17 | NM_002452    | NUDT1     | -1.17 |
| NM_004120    | GBP2         | -1.17 | NM_003925    | MBD4      | -1.17 |
| NM_000456    | SUOX         | -1.17 | NM_000255    | MUT       | -1.17 |
| NM_022739    | SMURF2       | -1.17 | NM_002659    | PLAUR     | -1.17 |
| NM_001318    | CSHL1        | -1.17 | NM_015507    | EGFL6     | -1.17 |
| NM_002820    | PTHLH        | -1.17 | NM_014580    | SLC2A8    | -1.17 |
| NM_003970    | MYOM2        | -1.17 | XM_376589    | KIAA0241  | -1.17 |
| NM_130781    | RAB24        | -1.17 | NM_016095    | PFS2      | -1.17 |
| NM_018946    | NANS         | -1.17 | XM_035299    | ZSWIM6    | -1.17 |

|              |           |       |           |           |       |
|--------------|-----------|-------|-----------|-----------|-------|
| NM_022127    | SLC28A3   | -1.17 | NM_024321 | MGC10433  | -1.17 |
| NM_032578    | MYPN      | -1.17 | NM_144706 | C2ORF15   | -1.17 |
| NM_153606    | FLJ32796  | -1.17 | XM_378314 | LOC283152 | -1.17 |
| NM_173623    | FLJ35808  | -1.17 | NM_173627 | FLJ35220  | -1.17 |
| NM_174979    | C14ORF65  | -1.17 | XM_061427 | LOC119358 | -1.17 |
| XM_374302    | LOC389782 | -1.17 | NM_003583 | DYRK2     | -1.16 |
| NM_000208    | INSR      | -1.16 | NM_001420 | ELAVL3    | -1.16 |
| NM_007344    | TTF1      | -1.16 | NM_003450 | ZNF174    | -1.16 |
| NM_001406    | EFNB3     | -1.16 | NM_000936 | PNLIP     | -1.16 |
| NM_003625    | PPFIA2    | -1.16 | NM_003746 | DNCL1     | -1.16 |
| NM_004268    | CRSP6     | -1.16 | NM_005555 | KRT6B     | -1.16 |
| NM_032513    | SLC30A2   | -1.16 | NM_006798 | UGT2A1    | -1.16 |
| NM_015227    | POFUT2    | -1.16 | NM_015293 | SYNE1     | -1.16 |
| NM_016040    | CGI-100   | -1.16 | NM_022461 | AZ2       | -1.16 |
| NM_022763    | FNDC3B    | -1.16 | NM_022475 | HHIP      | -1.16 |
| NM_022827    | FLJ21347  | -1.16 | XM_044212 | KIAA1862  | -1.16 |
| NM_182482    | BAGE2     | -1.16 | NM_199242 | UNC13D    | -1.16 |
| NM_173633    | FLJ90805  | -1.16 | XM_379432 | LOC285733 | -1.16 |
| XM_292357    | LOC342096 | -1.16 | XM_376658 | LOC401393 | -1.16 |
| NM_001005226 | OR2B3     | -1.16 | XM_372205 | LOC389850 | -1.16 |
| NM_001824    | CKM       | -1.15 | NM_006658 | C7ORF16   | -1.15 |
| NM_022755    | C9ORF12   | -1.15 | NM_002074 | GNB1      | -1.15 |
| NM_005250    | FOXL1     | -1.15 | NM_015859 | GTF2A1    | -1.15 |
| NM_003899    | ARHGEF7   | -1.15 | NM_006205 | PDE6H     | -1.15 |
| NM_004515    | ILF2      | -1.15 | NM_014619 | GRIK4     | -1.15 |
| NM_032045    | KREMEN1   | -1.15 | NM_000725 | CACNB3    | -1.15 |
| NM_004460    | FAP       | -1.15 | NM_002948 | RPL15     | -1.15 |
| NM_003956    | CH25H     | -1.15 | NM_014744 | TBC1D5    | -1.15 |
| NM_006614    | CHL1      | -1.15 | NM_012477 | WBP1      | -1.15 |
| XM_113763    | C14ORF125 | -1.15 | NM_015456 | COBRA1    | -1.15 |
| NM_015691    | KIAA1280  | -1.15 | XM_290818 | SPIRE1    | -1.15 |
| XM_373827    | FLJ20719  | -1.15 | NM_021220 | ZNF339    | -1.15 |
| NM_031206    | FLJ12525  | -1.15 | NM_032753 | MGC15631  | -1.15 |
| NM_032878    | MGC15677  | -1.15 | NM_144995 | DHX57     | -1.15 |
| NM_022456    | RAB3IP    | -1.15 | NM_182526 | FLJ33387  | -1.15 |
| NM_182604    | FLJ36131  | -1.15 | XM_293599 | TMPRSS7   | -1.15 |
| NM_198693    | KRTAP18-2 | -1.15 | XM_374730 | LOC392702 | -1.15 |
| NM_000399    | EGR2      | -1.14 | NM_004488 | GP5       | -1.14 |
| NM_003259    | ICAM5     | -1.14 | NM_003946 | NOL3      | -1.14 |
| NM_004476    | FOLH1     | -1.14 | NM_004581 | RABGGTA   | -1.14 |
| NM_006109    | SKB1      | -1.14 | NM_002661 | PLCG2     | -1.14 |
| NM_001714    | BICD1     | -1.14 | NM_022147 | IFRG28    | -1.14 |
| NM_003126    | SPTA1     | -1.14 | NM_015296 | DOCK9     | -1.14 |
| NM_014298    | QPRT      | -1.14 | XM_046390 | ZNF473    | -1.14 |
| NM_016080    | CGI-150   | -1.14 | NM_182791 | FLJ32855  | -1.14 |
| NM_145204    | SENP8     | -1.14 | XM_065166 | KIAA1957  | -1.14 |

|              |               |       |           |               |       |
|--------------|---------------|-------|-----------|---------------|-------|
| NM_175921    | LOC285636     | -1.14 | NM_173697 | FLJ33610      | -1.14 |
| NM_178555    | FLJ25770      | -1.14 | NM_207393 | UNQ483        | -1.14 |
| NM_207429    | FLJ45803      | -1.14 | XM_377786 | LOC402120     | -1.14 |
| XM_374586    | LOC392843     | -1.14 | XM_373713 | LOC388334     | -1.14 |
| NM_001001436 | LOC388272     | -1.14 | NM_022170 | WBSCR1        | -1.13 |
| NM_000930    | PLAT          | -1.13 | NM_139025 | ADAMTS13      | -1.13 |
| NM_031483    | ITCH          | -1.13 | NM_019009 | TOLLIP        | -1.13 |
| NM_002264    | KPNA1         | -1.13 | NM_005736 | ACTR1A        | -1.13 |
| NM_021078    | GCN5L2        | -1.13 | NM_003984 | SLC13A2       | -1.13 |
| NM_005745    | BCAP31        | -1.13 | NM_207304 | MBNL2         | -1.13 |
| NM_015158    | ANKRD15       | -1.13 | NM_015945 | SLC35C2       | -1.13 |
| NM_014596    | ZNRD1         | -1.13 | NM_016559 | PEX5R         | -1.13 |
| NM_019617    | GKN1          | -1.13 | NM_031953 | SNX25         | -1.13 |
| NM_030953    | TIGD6         | -1.13 | NM_024628 | SLC12A8       | -1.13 |
| XM_375629    | DKFZP434J0226 | -1.13 | NM_198445 | FLJ45909      | -1.13 |
| NM_153689    | FLJ38973      | -1.13 | XM_290615 | DKFZP762F0713 | -1.13 |
| NM_203481    | MGC70870      | -1.13 | XM_374226 | LOC389533     | -1.13 |
| XM_374625    | LOC392943     | -1.13 | XM_379696 | LOC401579     | -1.13 |
| NM_001004737 | OR5K2         | -1.13 | NM_012247 | SEPHS1        | -1.12 |
| NM_003617    | RGS5          | -1.12 | NM_001541 | HSPB2         | -1.12 |
| NM_030752    | TCP1          | -1.12 | NM_000963 | PTGS2         | -1.12 |
| NM_024607    | PPP1R3B       | -1.12 | NM_001501 | GNRH2         | -1.12 |
| NM_000734    | CD3Z          | -1.12 | NM_001147 | ANGPT2        | -1.12 |
| NM_000119    | EPB42         | -1.12 | NM_004493 | HADH2         | -1.12 |
| NM_017977    | AIM1L         | -1.12 | NM_005033 | EXOSC9        | -1.12 |
| NM_006969    | ZNF28         | -1.12 | NM_172020 | POM121        | -1.12 |
| NM_016407    | C20ORF43      | -1.12 | NM_018983 | NOLA1         | -1.12 |
| NM_018144    | SEC61A2       | -1.12 | NM_018178 | GPP34R        | -1.12 |
| NM_017876    | RNF126        | -1.12 | NM_018326 | HIMAP4        | -1.12 |
| NM_020404    | CD164L1       | -1.12 | NM_020453 | ATP10D        | -1.12 |
| NM_022497    | MRPS25        | -1.12 | NM_025091 | CXYORF2       | -1.12 |
| NM_198150    | DKFZP313G1735 | -1.12 | NM_207366 | FLJ44060      | -1.12 |
| XM_293937    | LOC345711     | -1.12 | XM_294688 | LOC338731     | -1.12 |
| XM_380098    | LOC402475     | -1.12 | XM_379899 | LOC402572     | -1.12 |
| NM_018208    | FLJ10761      | -1.11 | NM_016082 | CDK5RAP1      | -1.11 |
| NM_000707    | AVPR1B        | -1.11 | NM_004444 | EPHB4         | -1.11 |
| NM_005569    | LIMK2         | -1.11 | NM_002880 | RAF1          | -1.11 |
| NM_006564    | CXCR6         | -1.11 | NM_020377 | CYSLTR2       | -1.11 |
| NM_176888    | TAS2R48       | -1.11 | XM_371933 | PPP1R9A       | -1.11 |
| NM_018898    | PCDHAC1       | -1.11 | NM_003802 | MYH13         | -1.11 |
| NM_000248    | MITF          | -1.11 | NM_003408 | ZFP37         | -1.11 |
| NM_014746    | RNF144        | -1.11 | NM_000518 | HBB           | -1.11 |
| NM_002085    | GPX4          | -1.11 | NM_000783 | CYP26A1       | -1.11 |
| NM_030663    | MCSP          | -1.11 | NM_006054 | RTN3          | -1.11 |
| NM_014742    | TM9SF4        | -1.11 | NM_006876 | B3GNT6        | -1.11 |
| NM_007230    | MAN1B1        | -1.11 | NM_178225 | FBXW5         | -1.11 |



|              |             |       |              |           |       |
|--------------|-------------|-------|--------------|-----------|-------|
| NM_019008    | FLJ20232    | -1.11 | NM_017733    | FLJ20265  | -1.11 |
| NM_018155    | FLJ10618    | -1.11 | NM_021173    | POLD4     | -1.11 |
| NM_023937    | MRPL34      | -1.11 | NM_032325    | MGC11102  | -1.11 |
| XM_059468    | MDH1B       | -1.11 | XM_370944    | LOC146177 | -1.11 |
| NM_174914    | LOC167127   | -1.11 | NM_130901    | C15ORF16  | -1.11 |
| NM_078483    | SLC36A1     | -1.11 | XM_374020    | LOC375295 | -1.11 |
| NM_194249    | DND1        | -1.11 | XM_069842    | LOC136321 | -1.11 |
| XM_377566    | LOC401940   | -1.11 | XM_374101    | LOC389250 | -1.11 |
| XM_374270    | LOC389659   | -1.11 | XM_372543    | LOC390530 | -1.11 |
| NM_004714    | DYRK1B      | -1.1  | NM_002024    | FMR1      | -1.1  |
| NM_005641    | TAF6        | -1.1  | NM_014943    | ZHX2      | -1.1  |
| NM_002912    | REV3L       | -1.1  | NM_000140    | FECH      | -1.1  |
| NM_014871    | USP52       | -1.1  | NM_145251    | STYX      | -1.1  |
| NM_000564    | IL5RA       | -1.1  | NM_006211    | PENK      | -1.1  |
| NM_005761    | PLXNC1      | -1.1  | NM_003355    | UCP2      | -1.1  |
| NM_001664    | RHOA        | -1.1  | NM_020350    | AGTRAP    | -1.1  |
| NM_000067    | CA2         | -1.1  | NM_000331    | SAA1      | -1.1  |
| NM_006552    | SCGB1D1     | -1.1  | NM_002080    | GOT2      | -1.1  |
| NM_004793    | PRSS15      | -1.1  | NM_199131    | VAX1      | -1.1  |
| NM_015213    | RAB6IP1     | -1.1  | NM_018070    | SSBP3     | -1.1  |
| NM_022006    | FXYP7       | -1.1  | NM_018264    | FLJ10900  | -1.1  |
| NM_017879    | FLJ20557    | -1.1  | NM_020169    | LXN       | -1.1  |
| NM_019100    | DMAP1       | -1.1  | NM_020214    | LOC56965  | -1.1  |
| NM_020644    | C11ORF15    | -1.1  | NM_020710    | KIAA1185  | -1.1  |
| NM_021188    | ZNF410      | -1.1  | NM_024882    | C6ORF155  | -1.1  |
| NM_152603    | ZNF567      | -1.1  | NM_181536    | PKD1L3    | -1.1  |
| XM_028217    | LOC90024    | -1.1  | XM_378883    | LOC400768 | -1.1  |
| XM_371535    | LOC389002   | -1.1  | XM_379818    | LOC402488 | -1.1  |
| NM_001004348 | FLJ16171    | -1.1  | NM_000686    | AGTR2     | -1.09 |
| NM_001300    | COPEB       | -1.09 | NM_003923    | FOXH1     | -1.09 |
| NM_001266    | CES1        | -1.09 | NM_003442    | ZNF143    | -1.09 |
| NM_176783    | PSME1       | -1.09 | NM_001155    | ANXA6     | -1.09 |
| NM_005583    | LYL1        | -1.09 | NM_006341    | MAD2L2    | -1.09 |
| NM_005278    | GPM6B       | -1.09 | NM_012084    | GLUD2     | -1.09 |
| NM_006057    | B3GALT5     | -1.09 | NM_014913    | KIAA0863  | -1.09 |
| XM_038288    | ZCCHC11     | -1.09 | NM_007364    | P24B      | -1.09 |
| NM_080730    | HOM-TES-103 | -1.09 | XM_058628    | C14ORF109 | -1.09 |
| NM_018722    | KCNQ1DN     | -1.09 | NM_178817    | C21ORF61  | -1.09 |
| NM_021825    | MDS025      | -1.09 | NM_032577    | LOC84664  | -1.09 |
| NM_032788    | ZNF514      | -1.09 | NM_138391    | C1ORF37   | -1.09 |
| NM_080745    | RNF36       | -1.09 | XM_086996    | LOC150763 | -1.09 |
| NM_178569    | CEI         | -1.09 | NM_153268    | FLJ31579  | -1.09 |
| NM_182757    | IBRDC2      | -1.09 | NM_207449    | FLJ44674  | -1.09 |
| NM_004981    | KCNJ4       | -1.09 | XM_116036    | LOC200959 | -1.09 |
| XM_208319    | LOC285412   | -1.09 | XM_377882    | LOC402205 | -1.09 |
| XM_378411    | LOC400123   | -1.09 | NM_001001667 | OR6V1     | -1.09 |

|           |               |       |              |           |       |
|-----------|---------------|-------|--------------|-----------|-------|
| NM_005241 | EVI1          | -1.08 | NM_000054    | AVPR2     | -1.08 |
| NM_006480 | RGS14         | -1.08 | NM_004697    | PRPF4     | -1.08 |
| NM_012182 | FOXB1         | -1.08 | NM_002200    | IRF5      | -1.08 |
| NM_003196 | TCEA3         | -1.08 | NM_003907    | EIF2B5    | -1.08 |
| NM_139018 | NKIR          | -1.08 | NM_002619    | PF4       | -1.08 |
| NM_000214 | JAG1          | -1.08 | NM_000900    | MGP       | -1.08 |
| NM_000370 | TTPA          | -1.08 | NM_000830    | GRIK1     | -1.08 |
| NM_005510 | DOM3Z         | -1.08 | NM_002442    | MSI1      | -1.08 |
| NM_006814 | PSMF1         | -1.08 | NM_005829    | AP3S2     | -1.08 |
| NM_016300 | ARPP-21       | -1.08 | XM_375375    | KIAA0431  | -1.08 |
| NM_012137 | DDAH1         | -1.08 | NM_012459    | TIMM8B    | -1.08 |
| NM_024627 | FLJ21125      | -1.08 | NM_024989    | PGAP1     | -1.08 |
| NM_145234 | CHRDL1        | -1.08 | NM_080659    | MGC14839  | -1.08 |
| NM_033420 | C19ORF6       | -1.08 | NM_198451    | FOXR2     | -1.08 |
| NM_144690 | ZNF582        | -1.08 | NM_173527    | FLJ38964  | -1.08 |
| NM_175616 | FIS           | -1.08 | NM_173358    | SSX7      | -1.08 |
| XM_208731 | C14ORF68      | -1.08 | NM_182573    | FLJ30469  | -1.08 |
| NM_178545 | LOC339456     | -1.08 | NM_182603    | FLJ37874  | -1.08 |
| NM_198686 | RAB15         | -1.08 | NM_023002    | HAPLN4    | -1.08 |
| XM_292796 | LOC342931     | -1.08 | XM_372789    | LOC391088 | -1.08 |
| XM_377970 | LOC402295     | -1.08 | XM_378259    | LOC399832 | -1.08 |
| XM_380120 | LOC402537     | -1.08 | XM_370895    | LOC388163 | -1.08 |
| XM_372668 | LOC390790     | -1.08 | NM_001001343 | MGC27121  | -1.08 |
| NM_002968 | SALL1         | -1.07 | NM_021958    | HLX1      | -1.07 |
| NM_016086 | MK-STYX       | -1.07 | NM_000832    | GRIN1     | -1.07 |
| NM_003786 | ABCC3         | -1.07 | NM_031892    | SH3KBP1   | -1.07 |
| NM_001696 | ATP6V1E1      | -1.07 | XM_290552    | CNGA4     | -1.07 |
| NM_033133 | CNP           | -1.07 | NM_002151    | HPN       | -1.07 |
| NM_020783 | SYT4          | -1.07 | NM_014932    | NLGN1     | -1.07 |
| NM_014385 | SIGLEC7       | -1.07 | NM_031890    | CECR6     | -1.07 |
| NM_017622 | FLJ20014      | -1.07 | NM_020650    | RCN3      | -1.07 |
| NM_024731 | C16ORF44      | -1.07 | NM_025215    | PUS1      | -1.07 |
| NM_032140 | DKFZP434A1319 | -1.07 | NM_032175    | FLJ12787  | -1.07 |
| XM_059929 | LOC137886     | -1.07 | XM_379260    | LOC152742 | -1.07 |
| NM_145034 | LOC163590     | -1.07 | NM_145016    | BXMAS2-10 | -1.07 |
| NM_198469 | C9ORF18       | -1.07 | NM_153003    | OFCC1     | -1.07 |
| NM_207646 | LOC400696     | -1.07 | XM_372769    | LOC391013 | -1.07 |
| NM_003684 | MKNK1         | -1.06 | NM_004724    | ZW10      | -1.06 |
| NM_001427 | EN2           | -1.06 | NM_005596    | NFIB      | -1.06 |
| NM_003418 | ZNF9          | -1.06 | NM_017436    | A4GALT    | -1.06 |
| NM_022552 | DNMT3A        | -1.06 | NM_000601    | HGF       | -1.06 |
| NM_006676 | USP20         | -1.06 | NM_003584    | DUSP11    | -1.06 |
| NM_002894 | RBBP8         | -1.06 | NM_173714    | MTND6     | -1.06 |
| NM_003549 | HYAL3         | -1.06 | NM_014708    | KNTC1     | -1.06 |
| XM_371417 | KIAA0179      | -1.06 | NM_016127    | MGC8721   | -1.06 |
| NM_018091 | ELP3          | -1.06 | NM_017787    | C10ORF26  | -1.06 |

|              |           |       |           |           |       |
|--------------|-----------|-------|-----------|-----------|-------|
| NM_021224    | ZNF462    | -1.06 | NM_032620 | GTPBP3    | -1.06 |
| NM_178450    | 37681     | -1.06 | NM_172347 | KCNG4     | -1.06 |
| NM_152573    | RASEF     | -1.06 | NM_198467 | FLJ42526  | -1.06 |
| NM_016456    | TMEM9     | -1.06 | NM_199461 | NANOS1    | -1.06 |
| XM_115925    | LOC203604 | -1.06 | XM_374189 | LOC389441 | -1.06 |
| NM_001001330 | C10ORF74  | -1.06 | NM_002498 | NEK3      | -1.05 |
| NM_003893    | LDB1      | -1.05 | NM_004926 | ZFP36L1   | -1.05 |
| NM_001097    | ACR       | -1.05 | NM_005658 | TRAF1     | -1.05 |
| NM_000928    | PLA2G1B   | -1.05 | NM_004884 | PUNC      | -1.05 |
| NM_001092    | ABR       | -1.05 | NM_002867 | RAB3B     | -1.05 |
| NM_000828    | GRIA3     | -1.05 | NM_005516 | HLA-E     | -1.05 |
| NM_000833    | GRIN2A    | -1.05 | NM_001652 | AQP6      | -1.05 |
| NM_182615    | MGC40069  | -1.05 | NM_005966 | NAB1      | -1.05 |
| NM_005147    | DNAJA3    | -1.05 | NM_016090 | RBM7      | -1.05 |
| NM_015176    | FBXO28    | -1.05 | NM_015912 | LOC51059  | -1.05 |
| NM_018049    | PLEKHJ1   | -1.05 | NM_020684 | NPD007    | -1.05 |
| NM_024786    | ZDHHC11   | -1.05 | NM_024836 | FLJ22301  | -1.05 |
| NM_025029    | FLJ14346  | -1.05 | NM_031459 | SESN2     | -1.05 |
| NM_032740    | MGC5391   | -1.05 | NM_033083 | EAF1      | -1.05 |
| NM_198440    | C22ORF14  | -1.05 | NM_205767 | QIL1      | -1.05 |
| XM_376718    | FLJ45737  | -1.05 | NM_173635 | FLJ40235  | -1.05 |
| NM_207376    | LOC387882 | -1.05 | XM_293971 | LOC345778 | -1.05 |
| XM_373038    | TRIM61    | -1.05 | NM_003427 | ZNF76     | -1.04 |
| NM_002148    | HOXD10    | -1.04 | NM_002454 | MTRR      | -1.04 |
| NM_004994    | MMP9      | -1.04 | NM_002504 | NFX1      | -1.04 |
| NM_005188    | CBL       | -1.04 | NM_021006 | CCL3L1    | -1.04 |
| NM_005120    | TNRC11    | -1.04 | NM_001298 | CNGA3     | -1.04 |
| NM_014208    | DSPP      | -1.04 | NM_021922 | FANCE     | -1.04 |
| NM_000326    | RLBP1     | -1.04 | NM_002792 | PSMA7     | -1.04 |
| NM_130777    | GAGED3    | -1.04 | NM_006594 | AP4B1     | -1.04 |
| NM_006781    | C6ORF10   | -1.04 | NM_018204 | CKAP2     | -1.04 |
| NM_016535    | ZNF581    | -1.04 | NM_032186 | KIAA1221  | -1.04 |
| NM_058187    | C21ORF63  | -1.04 | NM_032859 | C13ORF6   | -1.04 |
| NM_033495    | KLHL13    | -1.04 | NM_194278 | C14ORF43  | -1.04 |
| NM_130830    | LRRC15    | -1.04 | NM_182533 | FLJ31031  | -1.04 |
| NM_182572    | ZSCAN1    | -1.04 | NM_199134 | LOC283970 | -1.04 |
| XM_063084    | LOC122335 | -1.04 | NM_178546 | LOC339483 | -1.04 |
| XM_294540    | LOC340485 | -1.04 | XM_293396 | LOC347512 | -1.04 |
| XM_377928    | LOC402247 | -1.04 | XM_379648 | LOC401539 | -1.04 |
| XM_374296    | LOC389771 | -1.04 | XM_376909 | LOC401551 | -1.04 |
| XM_370537    | LOC387643 | -1.04 | XM_373748 | LOC388418 | -1.04 |
| XM_378750    | LOC400653 | -1.04 | NM_006254 | PRKCD     | -1.03 |
| NM_004606    | TAF1      | -1.03 | NM_006280 | SSR4      | -1.03 |
| NM_002049    | GATA1     | -1.03 | NM_002142 | HOXA9     | -1.03 |
| NM_014589    | PLA2G2E   | -1.03 | NM_012167 | FBXO11    | -1.03 |
| NM_152306    | UHRF2     | -1.03 | NM_001611 | ACP5      | -1.03 |

|              |           |       |              |               |       |
|--------------|-----------|-------|--------------|---------------|-------|
| NM_014443    | IL17B     | -1.03 | NM_002042    | GABRR1        | -1.03 |
| NM_006981    | NR4A3     | -1.03 | NM_000421    | KRT10         | -1.03 |
| NM_003571    | BFSP2     | -1.03 | NM_018451    | CENPJ         | -1.03 |
| NM_002288    | LAIR2     | -1.03 | NM_020432    | PHTF2         | -1.03 |
| NM_005493    | RANBP9    | -1.03 | NM_006701    | TXNL4         | -1.03 |
| XM_051091    | KIAA1040  | -1.03 | NM_014149    | HSPC049       | -1.03 |
| NM_015860    | HUMRTVLH3 | -1.03 | NM_017638    | FLJ20045      | -1.03 |
| NM_017652    | ZNF586    | -1.03 | NM_020962    | NOPE          | -1.03 |
| NM_024820    | KIAA1608  | -1.03 | NM_022165    | LIN7B         | -1.03 |
| NM_024540    | MRPL24    | -1.03 | NM_024781    | C18ORF14      | -1.03 |
| NM_031439    | SOX7      | -1.03 | NM_080663    | MGC16943      | -1.03 |
| NM_153343    | ENPP6     | -1.03 | NM_207331    | LOC153561     | -1.03 |
| NM_153357    | SLC16A11  | -1.03 | XM_090294    | FLJ38508      | -1.03 |
| NM_182587    | C2ORF21   | -1.03 | NM_198568    | GJB7          | -1.03 |
| NM_182632    | SLC6A18   | -1.03 | NM_001005241 | OR4N4         | -1.03 |
| NM_207118    | C6ORF175  | -1.03 | XM_290734    | LOC339162     | -1.03 |
| XM_067904    | LOC132556 | -1.03 | XM_371638    | LOC389117     | -1.03 |
| XM_374004    | LOC389025 | -1.03 | XM_376822    | LOC401497     | -1.03 |
| NM_001002847 | DERPC     | -1.03 | NM_006182    | DDR2          | -1.02 |
| NM_003851    | CREG      | -1.02 | NM_021961    | TEAD1         | -1.02 |
| NM_005504    | BCAT1     | -1.02 | NM_000155    | GALT          | -1.02 |
| NM_007101    | SARDH     | -1.02 | NM_020159    | SMARCAD1      | -1.02 |
| NM_007027    | TOPBP1    | -1.02 | NM_004655    | AXIN2         | -1.02 |
| NM_007039    | PTPN21    | -1.02 | NM_014448    | ARHGEF16      | -1.02 |
| NM_005717    | ARPC5     | -1.02 | NM_138296    | PTCRA         | -1.02 |
| NM_021021    | SNTB1     | -1.02 | NM_007006    | CPSF5         | -1.02 |
| NM_170678    | ITGB1BP3  | -1.02 | NM_017982    | FLJ10052      | -1.02 |
| NM_018245    | OGDHL     | -1.02 | NM_018270    | C20ORF20      | -1.02 |
| NM_031418    | TMEM16C   | -1.02 | NM_024807    | TREML2        | -1.02 |
| NM_030576    | MGC10986  | -1.02 | NM_024864    | FLJ22578      | -1.02 |
| NM_031446    | C18ORF21  | -1.02 | NM_032290    | ANKRD32       | -1.02 |
| NM_052859    | RFT1      | -1.02 | NM_152340    | FLJ39075      | -1.02 |
| NM_144588    | ZFYVE27   | -1.02 | XM_088142    | C7ORF32       | -1.02 |
| NM_015447    | CAMSAP1   | -1.02 | XM_095568    | DKFZP762C1112 | -1.02 |
| NM_153450    | LCMR1     | -1.02 | NM_145720    | TIGD4         | -1.02 |
| NM_147129    | FLJ36525  | -1.02 | NM_198534    | FLJ35784      | -1.02 |
| XM_293821    | LOC345456 | -1.02 | XM_371305    | LOC388688     | -1.02 |
| XM_374003    | LOC389024 | -1.02 | XM_379146    | LOC401021     | -1.02 |
| XM_371402    | LOC388799 | -1.02 | XM_372227    | LOC389866     | -1.02 |
| NM_020990    | CKMT1     | -1.01 | NM_000020    | ACVRL1        | -1.01 |
| NM_033141    | MAP3K9    | -1.01 | NM_002461    | MVD           | -1.01 |
| NM_003177    | SYK       | -1.01 | NM_023005    | BAZ1B         | -1.01 |
| NM_013391    | DMGDH     | -1.01 | NM_002424    | MMP8          | -1.01 |
| NM_002547    | OPHN1     | -1.01 | NM_014948    | UBCE7IP5      | -1.01 |
| NM_139283    | TA-PP2C   | -1.01 | NM_003473    | STAM          | -1.01 |
| NM_006070    | TFG       | -1.01 | NM_004525    | LRP2          | -1.01 |

|           |           |       |           |               |       |
|-----------|-----------|-------|-----------|---------------|-------|
| NM_005675 | DGCR6     | -1.01 | NM_001133 | AFM           | -1.01 |
| NM_001865 | COX7A2    | -1.01 | NM_005669 | C5orf18       | -1.01 |
| NM_014676 | PUM1      | -1.01 | XM_088459 | KIAA0310      | -1.01 |
| NM_014147 | HSPC047   | -1.01 | NM_016120 | RNF12         | -1.01 |
| NM_016625 | MGC12197  | -1.01 | NM_020789 | IGSF9         | -1.01 |
| NM_020805 | KLHL14    | -1.01 | NM_022902 | SLC30A5       | -1.01 |
| XM_372124 | ZCCHC6    | -1.01 | NM_025232 | C8ORF20       | -1.01 |
| NM_030793 | FBXO38    | -1.01 | NM_031472 | MGC11134      | -1.01 |
| NM_032569 | N-PAC     | -1.01 | XM_166529 | GLCC11        | -1.01 |
| NM_153446 | GALGT2    | -1.01 | NM_152357 | ZNF440        | -1.01 |
| NM_080827 | WFDC6     | -1.01 | NM_144677 | MGAT5B        | -1.01 |
| NM_207374 | UNQ6469   | -1.01 | NM_199338 | FLJ35171      | -1.01 |
| XM_096885 | LOC145853 | -1.01 | XM_212319 | LOC286441     | -1.01 |
| XM_372775 | LOC391025 | -1.01 | XM_377884 | LOC402207     | -1.01 |
| XM_379406 | LOC401254 | -1.01 | NM_001699 | AXL           | -1    |
| NM_152835 | LOC149420 | -1    | NM_005301 | GPR35         | -1    |
| NM_004356 | CD81      | -1    | NM_004680 | CDY1          | -1    |
| NM_012383 | OSTF1     | -1    | NM_002178 | IGFBP6        | -1    |
| NM_002196 | INSM1     | -1    | NM_005230 | ELK3          | -1    |
| NM_001610 | ACP2      | -1    | NM_005932 | MIPEP         | -1    |
| NM_004253 | PLAA      | -1    | NM_005276 | GPD1          | -1    |
| NM_138793 | ENTPD8    | -1    | X53943    | HSSUCCDH      | -1    |
| NM_001801 | CDO1      | -1    | NM_152736 | ZNF187        | -1    |
| NM_014231 | VAMP1     | -1    | NM_005871 | SMNDC1        | -1    |
| NM_007236 | CHP       | -1    | NM_014907 | FRMPD1        | -1    |
| XM_166213 | DTX4      | -1    | NM_016458 | LOC51236      | -1    |
| NM_016484 | LOC51248  | -1    | NM_016546 | C1RL          | -1    |
| NM_014603 | HUMPPA    | -1    | NM_017660 | P66ALPHA      | -1    |
| NM_018322 | C6ORF64   | -1    | NM_024334 | MGC3222       | -1    |
| NM_032486 | MGC3248   | -1    | NM_032332 | MGC4238       | -1    |
| XM_370567 | KIAA1975  | -1    | NM_194302 | DKFZP434O0527 | -1    |
| NM_207504 | FLJ46365  | -1    | XM_063871 | LOC123855     | -1    |
| XM_379108 | LOC400969 | -1    | XM_379458 | LOC401287     | -1    |
| XM_377832 | LOC402166 | -1    | XM_373553 | LOC387895     | -1    |
| XM_378682 | LOC400602 | -1    | XM_373772 | LOC388459     | -1    |
| XM_379879 | LOC402558 | -1    | NM_006301 | MAP3K12       | -0.99 |
| NM_012360 | OR1F1     | -0.99 | NM_004134 | HSPA9B        | -0.99 |
| NM_018902 | PCDHA11   | -0.99 | NM_006709 | BAT8          | -0.99 |
| NM_000353 | TAT       | -0.99 | NM_022337 | RAB38         | -0.99 |
| NM_006239 | PPEF2     | -0.99 | NM_002562 | P2RX7         | -0.99 |
| NM_021072 | HCN1      | -0.99 | NM_006430 | CCT4          | -0.99 |
| NM_006329 | FBLN5     | -0.99 | NM_005892 | FMNL1         | -0.99 |
| NM_005015 | OXA1L     | -0.99 | NM_006298 | ZNF192        | -0.99 |
| NM_014279 | OLFM1     | -0.99 | NM_020470 | YIF1          | -0.99 |
| NM_024979 | MCF2L     | -0.99 | NM_018210 | FLJ10769      | -0.99 |
| NM_020180 | BRUNOL4   | -0.99 | NM_030807 | SLC2A11       | -0.99 |

|              |           |       |           |               |       |
|--------------|-----------|-------|-----------|---------------|-------|
| NM_024026    | MRP63     | -0.99 | NM_024595 | FLJ12666      | -0.99 |
| NM_024102    | MEP50     | -0.99 | NM_031449 | DKFZP76112123 | -0.99 |
| NM_032272    | MAF1      | -0.99 | XM_352953 | MGC10646      | -0.99 |
| NM_144605    | FLJ25410  | -0.99 | NM_152312 | GYLTL1B       | -0.99 |
| NM_207015    | LOC254827 | -0.99 | NM_207342 | MGC87042      | -0.99 |
| NM_198553    | FLJ30851  | -0.99 | NM_182616 | MGC61550      | -0.99 |
| NM_207469    | UNQ827    | -0.99 | XM_377830 | DUB1A         | -0.99 |
| XM_085138    | LOC145414 | -0.99 | XM_373840 | LOC388623     | -0.99 |
| XM_374893    | LOC399904 | -0.99 | NM_001495 | GFRA2         | -0.98 |
| NM_016457    | PRKD2     | -0.98 | NM_002626 | PFKL          | -0.98 |
| NM_000674    | ADORA1    | -0.98 | NM_005294 | GPR21         | -0.98 |
| NM_002589    | PCDH7     | -0.98 | NM_003461 | ZYX           | -0.98 |
| NM_172208    | TAPBP     | -0.98 | NM_003869 | CES2          | -0.98 |
| NM_004408    | DNM1      | -0.98 | NM_005361 | MAGEA2        | -0.98 |
| NM_007161    | LST1      | -0.98 | XM_038604 | UNC13A        | -0.98 |
| NM_020393    | PGLYRP4   | -0.98 | NM_032138 | KBTBD7        | -0.98 |
| NM_020856    | ZNF537    | -0.98 | XM_041126 | KIAA1486      | -0.98 |
| NM_023933    | MGC2494   | -0.98 | NM_025069 | FLJ14299      | -0.98 |
| NM_032744    | C6ORF105  | -0.98 | XM_373433 | LOC90379      | -0.98 |
| NM_173471    | SLC25A26  | -0.98 | NM_138808 | LOC132200     | -0.98 |
| NM_173597    | FLJ37587  | -0.98 | NM_173822 | MGC39518      | -0.98 |
| NM_207470    | FLJ45832  | -0.98 | XM_374094 | LOC389237     | -0.98 |
| XM_371798    | LOC389366 | -0.98 | XM_379962 | LOC402620     | -0.98 |
| XM_372310    | LOC389953 | -0.98 | XM_373362 | LOC392517     | -0.98 |
| NM_001004303 | LOC199920 | -0.98 | NM_015133 | MAPK8IP3      | -0.97 |
| NM_022128    | RBKS      | -0.97 | NM_005417 | SRC           | -0.97 |
| NM_002023    | FMOD      | -0.97 | NM_005595 | NFIA          | -0.97 |
| NM_014237    | ADAM18    | -0.97 | NM_005343 | HRAS          | -0.97 |
| NM_003560    | PLA2G6    | -0.97 | NM_006290 | TNFAIP3       | -0.97 |
| NM_005983    | SKP2      | -0.97 | NM_006678 | CMRF35        | -0.97 |
| NM_003712    | PPAP2C    | -0.97 | NM_005426 | TP53BP2       | -0.97 |
| NM_004004    | GJB2      | -0.97 | NM_003504 | CDC45L        | -0.97 |
| NM_020465    | NDRG4     | -0.97 | NM_001697 | ATP5O         | -0.97 |
| NM_014905    | GLS       | -0.97 | NM_014623 | MEA           | -0.97 |
| NM_018055    | NODAL     | -0.97 | NM_006007 | ZNF216        | -0.97 |
| NM_006634    | VAMP5     | -0.97 | NM_012149 | DUX5          | -0.97 |
| NM_016570    | PTX1      | -0.97 | NM_016201 | AMOTL2        | -0.97 |
| NM_016464    | HSPC196   | -0.97 | NM_017916 | FLJ20643      | -0.97 |
| NM_017730    | FLJ20259  | -0.97 | NM_020642 | C11ORF17      | -0.97 |
| NM_022368    | PJA1      | -0.97 | NM_032169 | FLJ12592      | -0.97 |
| NM_031465    | MGC13204  | -0.97 | NM_032770 | MGC16291      | -0.97 |
| NM_032795    | FLJ14494  | -0.97 | NM_032718 | MGC11332      | -0.97 |
| NM_080926    | LOC96610  | -0.97 | NM_173466 | DKFZP434P055  | -0.97 |
| NM_080389    | DEFB104   | -0.97 | NM_213602 | CD33L3        | -0.97 |
| NM_178558    | FLJ90430  | -0.97 | XM_290848 | LOC339344     | -0.97 |
| XM_372647    | LOC348180 | -0.97 | XM_298151 | LOC344595     | -0.97 |

|              |           |       |           |               |       |
|--------------|-----------|-------|-----------|---------------|-------|
| XM_378835    | LOC400733 | -0.97 | XM_372028 | LOC389630     | -0.97 |
| XM_374275    | LOC389671 | -0.97 | XM_373693 | LOC388295     | -0.97 |
| NM_001135    | AGC1      | -0.96 | NM_006237 | POU4F1        | -0.96 |
| NM_007122    | USF1      | -0.96 | NM_004740 | TIAF1         | -0.96 |
| NM_014520    | MYBBP1A   | -0.96 | NM_002842 | PTPRH         | -0.96 |
| NM_152511    | DUSP18    | -0.96 | NM_001644 | APOBEC1       | -0.96 |
| NM_003119    | SPG7      | -0.96 | NM_002290 | LAMA4         | -0.96 |
| NM_004334    | BST1      | -0.96 | NM_005689 | ABCB6         | -0.96 |
| NM_003130    | SRI       | -0.96 | NM_016196 | RBM19         | -0.96 |
| NM_006645    | STARD10   | -0.96 | NM_014926 | SLITRK3       | -0.96 |
| NM_014335    | CRI1      | -0.96 | NM_017753 | PRG-3         | -0.96 |
| NM_017878    | HRASLS2   | -0.96 | NM_020121 | UGCGL2        | -0.96 |
| NM_018428    | HCA66     | -0.96 | NM_145814 | CACNG6        | -0.96 |
| NM_024654    | FLJ23323  | -0.96 | NM_031211 | LAT1-3TM      | -0.96 |
| NM_032921    | MGC15875  | -0.96 | NM_053045 | MGC14327      | -0.96 |
| NM_080869    | WFDC12    | -0.96 | NM_152538 | IGSF11        | -0.96 |
| NM_145293    | LOC196549 | -0.96 | NM_203301 | FBXO33        | -0.96 |
| NM_198482    | LOC284948 | -0.96 | NM_173669 | FLJ34047      | -0.96 |
| XM_379650    | LOC340515 | -0.96 | NM_181688 | KRTAP10-10    | -0.96 |
| NM_201589    | MAFA      | -0.96 | XM_291625 | LOC374947     | -0.96 |
| XM_379180    | LOC401056 | -0.96 | XM_374090 | LOC389232     | -0.96 |
| XM_370668    | LOC387825 | -0.96 | XM_373497 | LOC387763     | -0.96 |
| NM_001001786 | BRCC2     | -0.96 | NM_152534 | FLJ32685      | -0.95 |
| NM_004443    | EPHB3     | -0.95 | NM_002720 | PPP4C         | -0.95 |
| NM_019106    | 37865     | -0.95 | NM_006163 | NFE2          | -0.95 |
| NM_000480    | AMPD3     | -0.95 | NM_000819 | GART          | -0.95 |
| NM_032673    | NSPC1     | -0.95 | NM_001178 | ARNTL         | -0.95 |
| NM_178813    | AKAP28    | -0.95 | NM_016952 | CDON          | -0.95 |
| NM_001914    | CYB5      | -0.95 | NM_005863 | NET1          | -0.95 |
| NM_014230    | SRP68     | -0.95 | NM_014328 | RUSC1         | -0.95 |
| NM_013237    | PX19      | -0.95 | NM_019029 | CPVL          | -0.95 |
| NM_017904    | FLJ20619  | -0.95 | NM_020170 | LOC56926      | -0.95 |
| NM_018671    | SMAP-1    | -0.95 | NM_020428 | CTL2          | -0.95 |
| XM_168030    | ZNF319    | -0.95 | NM_024541 | C10ORF76      | -0.95 |
| NM_025207    | PP591     | -0.95 | NM_032279 | DKFZP76111011 | -0.95 |
| NM_032509    | LOC84549  | -0.95 | XM_376590 | LOC89231      | -0.95 |
| NM_033284    | TBL1Y     | -0.95 | NM_033626 | JM11          | -0.95 |
| NM_052952    | DIRC1     | -0.95 | NM_144681 | FLJ32734      | -0.95 |
| NM_153354    | MGC33214  | -0.95 | NM_145008 | FLJ30213      | -0.95 |
| XM_378964    | LOC339593 | -0.95 | NM_207380 | FLJ43339      | -0.95 |
| NM_207439    | FLJ46358  | -0.95 | XM_063123 | LOC122423     | -0.95 |
| XM_059956    | LOC138255 | -0.95 | XM_376619 | LOC401357     | -0.95 |
| XM_373749    | LOC388420 | -0.95 | NM_000162 | GCK           | -0.94 |
| NM_004972    | JAK2      | -0.94 | NM_181504 | PIK3R1        | -0.94 |
| NM_003726    | SCAP1     | -0.94 | NM_000516 | GNAS          | -0.94 |
| NM_023915    | GPR87     | -0.94 | NM_005959 | MTNR1B        | -0.94 |

|           |           |       |              |           |       |
|-----------|-----------|-------|--------------|-----------|-------|
| NM_003651 | CSDA      | -0.94 | NM_004739    | MTA2      | -0.94 |
| NM_019892 | INPP5E    | -0.94 | NM_006202    | PDE4A     | -0.94 |
| NM_005484 | ADPRTL2   | -0.94 | NM_016937    | POLA      | -0.94 |
| NM_003852 | TIF1      | -0.94 | NM_002709    | PPP1CB    | -0.94 |
| NM_000261 | MYOC      | -0.94 | NM_003396    | WNT9B     | -0.94 |
| NM_019841 | TRPV5     | -0.94 | NM_001363    | DKC1      | -0.94 |
| NM_000440 | PDE6A     | -0.94 | NM_012191    | NAT6      | -0.94 |
| NM_005511 | MLANA     | -0.94 | NM_002137    | HNRPA2B1  | -0.94 |
| NM_005971 | FXYD3     | -0.94 | NM_003456    | ZNF205    | -0.94 |
| NM_032727 | INA       | -0.94 | NM_004807    | HS6ST1    | -0.94 |
| NM_014822 | SEC24D    | -0.94 | NM_005788    | HRMT1L3   | -0.94 |
| NM_005791 | MPHOSPH10 | -0.94 | NM_006825    | CKAP4     | -0.94 |
| NM_015929 | LIPT1     | -0.94 | NM_016446    | C9ORF127  | -0.94 |
| NM_018039 | JMJD2D    | -0.94 | XM_290854    | GPR108    | -0.94 |
| NM_020193 | C11ORF30  | -0.94 | NM_020800    | KIAA1374  | -0.94 |
| NM_033066 | MPP4      | -0.94 | NM_022365    | DNAJC1    | -0.94 |
| NM_024798 | SNX22     | -0.94 | NM_025243    | SLC19A3   | -0.94 |
| NM_144587 | C10ORF87  | -0.94 | NM_177998    | OTOP1     | -0.94 |
| NM_080678 | NCE2      | -0.94 | NM_080617    | CBLNL1    | -0.94 |
| XM_378973 | LOC284801 | -0.94 | NM_198570    | UNQ739    | -0.94 |
| XM_210906 | LOC283166 | -0.94 | XM_373802    | LOC388530 | -0.94 |
| XM_375929 | LOC400856 | -0.94 | NM_001005282 | OR5M8     | -0.94 |
| NM_004842 | AKAP7     | -0.93 | NM_001956    | EDN2      | -0.93 |
| NM_004360 | CDH1      | -0.93 | NM_018014    | BCL11A    | -0.93 |
| NM_007182 | RASSF1    | -0.93 | NM_002778    | PSAP      | -0.93 |
| NM_001040 | SHBG      | -0.93 | NM_006168    | NKX6-1    | -0.93 |
| NM_003077 | SMARCD2   | -0.93 | NM_000034    | ALDOA     | -0.93 |
| NM_000193 | SHH       | -0.93 | NM_002047    | GARS      | -0.93 |
| NM_002434 | MPG       | -0.93 | NM_170744    | UNC5B     | -0.93 |
| NM_006686 | ACTL7B    | -0.93 | NM_000593    | TAP1      | -0.93 |
| NM_000066 | C8B       | -0.93 | NM_001343    | DAB2      | -0.93 |
| NM_005266 | GJA5      | -0.93 | NM_022344    | NJMU-R1   | -0.93 |
| NM_017732 | PH-4      | -0.93 | NM_005697    | SCAMP2    | -0.93 |
| NM_054023 | SCGB3A2   | -0.93 | XM_084514    | HSPCAL3   | -0.93 |
| NM_004202 | TMSB4Y    | -0.93 | NM_006865    | LILRA3    | -0.93 |
| NM_021004 | DHRS4     | -0.93 | NM_007359    | CASC3     | -0.93 |
| NM_014281 | SIAHBP1   | -0.93 | NM_012387    | PADI4     | -0.93 |
| NM_015630 | EPC2      | -0.93 | NM_019037    | EXOSC4    | -0.93 |
| NM_014106 | FLJ20582  | -0.93 | NM_020782    | KLHDC5    | -0.93 |
| NM_024756 | MMRN2     | -0.93 | NM_032151    | DCOHM     | -0.93 |
| NM_032329 | ING5      | -0.93 | NM_032351    | MRPL45    | -0.93 |
| NM_032366 | MGC13114  | -0.93 | NM_138413    | C10ORF65  | -0.93 |
| NM_138344 | C14ORF152 | -0.93 | NM_033197    | C20ORF114 | -0.93 |
| NM_178824 | FLJ33620  | -0.93 | NM_144980    | C6ORF118  | -0.93 |
| NM_176816 | KENAE     | -0.93 | XM_210062    | RAC4      | -0.93 |
| XM_211197 | LOC283780 | -0.93 | XM_294219    | LOC346355 | -0.93 |



|              |               |       |           |               |       |
|--------------|---------------|-------|-----------|---------------|-------|
| XM_373053    | LOC391733     | -0.93 | XM_377957 | LOC402287     | -0.93 |
| XM_378590    | LOC400533     | -0.93 | XM_379699 | LOC401583     | -0.93 |
| XM_380127    | LOC402560     | -0.93 | NM_006307 | SRPX          | -0.92 |
| NM_004169    | SHMT1         | -0.92 | NM_002463 | MX2           | -0.92 |
| NM_000437    | PAFAH2        | -0.92 | NM_174907 | PPP4R2        | -0.92 |
| NM_006440    | TXNRD2        | -0.92 | NM_005409 | CXCL11        | -0.92 |
| NM_018558    | GABRQ         | -0.92 | NM_001650 | AQP4          | -0.92 |
| NM_004504    | HRB           | -0.92 | NM_152295 | TARS          | -0.92 |
| NM_005867    | DSCR4         | -0.92 | NM_015370 | HS747E2A      | -0.92 |
| NM_017570    | OPLAH         | -0.92 | NM_016422 | RNF141        | -0.92 |
| NM_016125    | LOC51136      | -0.92 | NM_017716 | MS4A12        | -0.92 |
| NM_020211    | RGMA          | -0.92 | NM_138400 | C7ORF3        | -0.92 |
| NM_031438    | NUDT12        | -0.92 | NM_033103 | RHPN2         | -0.92 |
| NM_152360    | ZNF573        | -0.92 | NM_174896 | MGC24133      | -0.92 |
| NM_144668    | MGC33630      | -0.92 | NM_145178 | ATOH7         | -0.92 |
| XM_375077    | C14ORF25      | -0.92 | NM_194272 | RBPMS2        | -0.92 |
| XM_374017    | LOC389059     | -0.92 | XM_378353 | LOC400030     | -0.92 |
| NM_001005490 | OR6C74        | -0.92 | NM_182707 | PSG8          | -0.92 |
| NM_022081    | HPS4          | -0.91 | NM_005778 | RBM5          | -0.91 |
| NM_002653    | PITX1         | -0.91 | NM_014564 | LHX3          | -0.91 |
| NM_005587    | MEF2A         | -0.91 | NM_000712 | BLVRA         | -0.91 |
| NM_005078    | TLE3          | -0.91 | NM_002238 | KCNH1         | -0.91 |
| NM_020535    | KIR2DL5       | -0.91 | NM_031933 | WNT8A         | -0.91 |
| NM_139017    | IL31RA        | -0.91 | NM_001848 | COL6A1        | -0.91 |
| NM_002826    | QSCN6         | -0.91 | NM_017744 | ST7L          | -0.91 |
| NM_001803    | CDW52         | -0.91 | NM_002215 | ITIH1         | -0.91 |
| NM_031284    | ADP-GK        | -0.91 | NM_005827 | SLC35B1       | -0.91 |
| NM_014829    | DDX46         | -0.91 | NM_014991 | WDFY3         | -0.91 |
| NM_014157    | HSPC065       | -0.91 | NM_022727 | HTF9C         | -0.91 |
| NM_015917    | LOC51064      | -0.91 | NM_018991 | DKFZP434A0131 | -0.91 |
| NM_017765    | PQLC2         | -0.91 | NM_018111 | FLJ10490      | -0.91 |
| NM_021800    | DNAJC12       | -0.91 | NM_021732 | AVPI1         | -0.91 |
| NM_020863    | ZNF406        | -0.91 | NM_022772 | EPS8L2        | -0.91 |
| NM_022116    | FIGNL1        | -0.91 | NM_024728 | C7ORF10       | -0.91 |
| NM_030939    | C6ORF62       | -0.91 | NM_031455 | CCDC3         | -0.91 |
| NM_207310    | DKFZP434E2321 | -0.91 | NM_144632 | FLJ30294      | -0.91 |
| NM_152393    | KBTBD5        | -0.91 | NM_144637 | ZDHHC19       | -0.91 |
| NM_182752    | LOC127262     | -0.91 | XM_095168 | EZI           | -0.91 |
| NM_152678    | FLJ34969      | -0.91 | NM_182540 | LOC203522     | -0.91 |
| NM_178865    | TDE2L         | -0.91 | NM_207410 | UNQ9356       | -0.91 |
| NM_206922    | TLP           | -0.91 | XM_291767 | LOC340900     | -0.91 |
| XM_374026    | LOC389081     | -0.91 | XM_372781 | LOC391047     | -0.91 |
| XM_370585    | LOC387721     | -0.91 | XM_371418 | LOC388830     | -0.91 |
| NM_001001795 | MGC70857      | -0.91 | NM_002069 | GNAI1         | -0.9  |
| NM_003834    | RGS11         | -0.9  | NM_005304 | GPR41         | -0.9  |
| NM_015517    | MIZF          | -0.9  | NM_003944 | SELENBP1      | -0.9  |

|           |           |       |              |           |       |
|-----------|-----------|-------|--------------|-----------|-------|
| NM_022037 | TIA1      | -0.9  | NM_002697    | POU2F1    | -0.9  |
| NM_000282 | PCCA      | -0.9  | NM_057175    | TBDN100   | -0.9  |
| NM_000228 | LAMB3     | -0.9  | NM_004862    | LITAF     | -0.9  |
| NM_017869 | BANP      | -0.9  | NM_006443    | C6ORF108  | -0.9  |
| NM_003798 | CTNNAL1   | -0.9  | BC025985     | IGHG4     | -0.9  |
| NM_138443 | CCDC5     | -0.9  | NM_052843    | OBSCN     | -0.9  |
| NM_000232 | SGCB      | -0.9  | NM_012234    | RYBP      | -0.9  |
| NM_015646 | RAP1B     | -0.9  | NM_004068    | AP2M1     | -0.9  |
| NM_006526 | ZNF217    | -0.9  | NM_007007    | CPSF6     | -0.9  |
| NM_015193 | ARC       | -0.9  | NM_015079    | KIAA1055  | -0.9  |
| NM_022047 | DEF6      | -0.9  | NM_019078    | UGT1A5    | -0.9  |
| NM_016327 | UPB1      | -0.9  | NM_017686    | GDAP2     | -0.9  |
| NM_018476 | BEX1      | -0.9  | NM_020194    | GL004     | -0.9  |
| NM_030811 | MRPS26    | -0.9  | NM_130782    | RGS18     | -0.9  |
| NM_024589 | FLJ22386  | -0.9  | NM_033060    | KRTAP4-10 | -0.9  |
| XM_372075 | C9ORF123  | -0.9  | NM_138804    | LOC130951 | -0.9  |
| NM_080610 | CST9L     | -0.9  | NM_152366    | MGC33338  | -0.9  |
| XM_059954 | C9ORF57   | -0.9  | XM_378860    | LOC149478 | -0.9  |
| XM_376829 | LOC158381 | -0.9  | NM_198458    | ZNF497    | -0.9  |
| NM_152694 | ZCCHC5    | -0.9  | NM_153375    | PLAC2     | -0.9  |
| XM_209104 | LOC284293 | -0.9  | XM_371791    | LOC389352 | -0.9  |
| XM_379664 | LOC401549 | -0.9  | XM_373765    | LOC388439 | -0.9  |
| XM_378760 | LOC400662 | -0.9  | NM_001004351 | MGC57359  | -0.9  |
| XM_373954 | LOC388893 | -0.9  | NM_004419    | DUSP5     | -0.89 |
| NM_020423 | PACE-1    | -0.89 | NM_014381    | MLH3      | -0.89 |
| NM_006271 | S100A1    | -0.89 | NM_006261    | PROP1     | -0.89 |
| NM_002541 | OGDH      | -0.89 | NM_004260    | RECQL4    | -0.89 |
| NM_003105 | SORL1     | -0.89 | NM_021081    | GHRH      | -0.89 |
| NM_003599 | SUPT3H    | -0.89 | NM_000423    | KRT2A     | -0.89 |
| NM_001042 | SLC2A4    | -0.89 | NM_015362    | DERP6     | -0.89 |
| NM_005085 | NUP214    | -0.89 | NM_004802    | OTOF      | -0.89 |
| NM_001606 | ABCA2     | -0.89 | NM_003313    | TSTA3     | -0.89 |
| NM_006574 | CSPG5     | -0.89 | NM_018957    | SH3BP1    | -0.89 |
| NM_015363 | ZIM2      | -0.89 | NM_030758    | OSBP2     | -0.89 |
| NM_014342 | MTCH2     | -0.89 | NM_018134    | FLJ10547  | -0.89 |
| NM_018182 | FLJ10700  | -0.89 | NM_019602    | BTNL2     | -0.89 |
| NM_021933 | FLJ12438  | -0.89 | NM_031950    | KSP37     | -0.89 |
| XM_088525 | C9ORF28   | -0.89 | NM_138416    | LOC112937 | -0.89 |
| NM_052945 | TNFRSF13C | -0.89 | NM_138439    | LOC114984 | -0.89 |
| XM_379204 | LOC152225 | -0.89 | NM_144994    | ANKRD23   | -0.89 |
| NM_152786 | C9ORF43   | -0.89 | XM_372924    | LOC391362 | -0.89 |
| XM_379182 | LOC401058 | -0.89 | XM_373865    | LOC388690 | -0.89 |
| XM_371837 | LOC389416 | -0.89 | XM_377129    | LOC401647 | -0.89 |
| XM_373555 | LOC387897 | -0.89 | XM_370894    | LOC388160 | -0.89 |
| NM_022445 | TPK1      | -0.88 | NM_000316    | PTHR1     | -0.88 |
| NM_005483 | CHAF1A    | -0.88 | NM_006813    | PNRC1     | -0.88 |

|           |               |       |           |              |       |
|-----------|---------------|-------|-----------|--------------|-------|
| NM_170607 | TCFL4         | -0.88 | NM_003399 | XPNPEP2      | -0.88 |
| NM_000062 | SERPING1      | -0.88 | NM_174941 | M160         | -0.88 |
| NM_006116 | MAP3K7IP1     | -0.88 | NM_000494 | COL17A1      | -0.88 |
| NM_021952 | ELAVL4        | -0.88 | NM_019054 | FAM35A       | -0.88 |
| NM_006198 | PCP4          | -0.88 | NM_002403 | MFAP2        | -0.88 |
| NM_021029 | RPL36A        | -0.88 | NM_006782 | ZFPL1        | -0.88 |
| NM_003569 | STX7          | -0.88 | NM_018691 | C5ORF3       | -0.88 |
| NM_007275 | TUSC2         | -0.88 | NM_014016 | SACM1L       | -0.88 |
| NM_015609 | DKFZP566C0424 | -0.88 | NM_014407 | KCNMB3       | -0.88 |
| NM_032295 | SLC37A3       | -0.88 | XM_042234 | LOC92017     | -0.88 |
| XM_038576 | LOC91461      | -0.88 | NM_138440 | LOC114990    | -0.88 |
| XM_085375 | ZFP90         | -0.88 | XM_085383 | LOC146206    | -0.88 |
| NM_144996 | DKFZP761H079  | -0.88 | NM_173561 | UNC5CL       | -0.88 |
| NM_178525 | MGC33407      | -0.88 | NM_003241 | TGM4         | -0.88 |
| XM_058857 | LOC124871     | -0.88 | XM_210876 | LOC283065    | -0.88 |
| XM_376160 | LOC401026     | -0.88 | XM_370924 | LOC388199    | -0.88 |
| NM_018084 | KIAA1212      | -0.88 | NM_032844 | MASTL        | -0.87 |
| NM_148963 | GPRC6A        | -0.87 | NM_018179 | ATF7IP       | -0.87 |
| NM_001186 | BACH1         | -0.87 | NM_003489 | NRIP1        | -0.87 |
| NM_005920 | MEF2D         | -0.87 | NM_019857 | CTPS2        | -0.87 |
| NM_000413 | HSD17B1       | -0.87 | NM_016021 | UBE2J1       | -0.87 |
| NM_003628 | PKP4          | -0.87 | NM_031903 | MRPL32       | -0.87 |
| NM_004475 | FLOT2         | -0.87 | NM_006178 | NSF          | -0.87 |
| NM_004876 | ZNF254        | -0.87 | NM_006710 | COPS8        | -0.87 |
| NM_015324 | KIAA0409      | -0.87 | NM_018226 | RNPEPL1      | -0.87 |
| NM_017809 | NXF2          | -0.87 | NM_020657 | ZNF304       | -0.87 |
| NM_024614 | FLJ13197      | -0.87 | NM_024824 | FLJ11806     | -0.87 |
| NM_031957 | KRTAP1-5      | -0.87 | NM_182481 | BAGE3        | -0.87 |
| NM_181710 | ZNRF4         | -0.87 | NM_144724 | MRVLDC2      | -0.87 |
| NM_153233 | FLJ36445      | -0.87 | NM_175922 | MGC35308     | -0.87 |
| XM_293923 | LOC345645     | -0.87 | XM_293875 | LOC345557    | -0.87 |
| XM_291977 | LOC338751     | -0.87 | XM_379595 | LOC401471    | -0.87 |
| XM_371028 | LOC388353     | -0.87 | XM_370930 | LOC388205    | -0.87 |
| NM_006422 | AKAP3         | -0.86 | NM_002740 | PRKCI        | -0.86 |
| NM_007284 | PTK9L         | -0.86 | NM_030784 | GPR63        | -0.86 |
| NM_021619 | PRDM12        | -0.86 | NM_014468 | VENTX2       | -0.86 |
| NM_014244 | ADAMTS2       | -0.86 | NM_000169 | GLA          | -0.86 |
| NM_000240 | MAOA          | -0.86 | NM_003234 | TFRC         | -0.86 |
| NM_003336 | UBE2A         | -0.86 | NM_006240 | PPEF1        | -0.86 |
| NM_004829 | NCR1          | -0.86 | NM_005310 | GRB7         | -0.86 |
| NM_014432 | IL20RA        | -0.86 | NM_017442 | TLR9         | -0.86 |
| NM_003846 | PEX11B        | -0.86 | NM_001044 | SLC6A3       | -0.86 |
| NM_005678 | SNURF         | -0.86 | NM_001867 | COX7C        | -0.86 |
| NM_004990 | MARS          | -0.86 | NM_016108 | AIG1         | -0.86 |
| NM_006958 | ZNF16         | -0.86 | NM_006348 | COG5         | -0.86 |
| NM_006629 | ZNF271        | -0.86 | NM_015659 | DKFZP564M182 | -0.86 |

|              |              |       |           |               |       |
|--------------|--------------|-------|-----------|---------------|-------|
| NM_014359    | OPTC         | -0.86 | NM_015936 | CGI-04        | -0.86 |
| NM_020437    | LOC57168     | -0.86 | NM_022473 | ZFP106        | -0.86 |
| NM_033086    | FGD3         | -0.86 | NM_152543 | FLJ25371      | -0.86 |
| NM_145026    | SPATS1       | -0.86 | NM_173656 | ZNF619        | -0.86 |
| XM_375316    | LOC283887    | -0.86 | XM_380174 | LOC285192     | -0.86 |
| NM_177403    | MGC9726      | -0.86 | NM_198992 | SYT10         | -0.86 |
| NM_207384    | UNQ5810      | -0.86 | NM_207389 | FLJ44861      | -0.86 |
| XM_017966    | LOC152905    | -0.86 | XM_371847 | LOC389429     | -0.86 |
| XM_379508    | LOC401386    | -0.86 | XM_372090 | LOC389725     | -0.86 |
| XM_377231    | LOC401704    | -0.86 | XM_375373 | LOC400547     | -0.86 |
| XM_375282    | LOC400479    | -0.86 | NM_004560 | ROR2          | -0.85 |
| NM_053006    | STK22B       | -0.85 | NM_024980 | GPR157        | -0.85 |
| NM_014268    | MAPRE2       | -0.85 | NM_002359 | MAFG          | -0.85 |
| NM_004457    | ACSL3        | -0.85 | NM_030949 | PPP1R14C      | -0.85 |
| NM_012464    | TLL1         | -0.85 | NM_000805 | GAS           | -0.85 |
| NM_003573    | LTBP4        | -0.85 | NM_001854 | COL11A1       | -0.85 |
| NM_018844    | BCAP29       | -0.85 | NM_001793 | CDH3          | -0.85 |
| NM_002462    | MX1          | -0.85 | NM_012227 | PGPL          | -0.85 |
| NM_005803    | FLOT1        | -0.85 | NM_006460 | HIS1          | -0.85 |
| XM_375042    | DKFZP434B061 | -0.85 | NM_016045 | C20ORF45      | -0.85 |
| NM_016070    | MRPS23       | -0.85 | NM_016126 | LOC51668      | -0.85 |
| NM_017656    | ZNF562       | -0.85 | NM_032292 | FLJ20203      | -0.85 |
| NM_017633    | C6ORF37      | -0.85 | NM_020199 | C5ORF15       | -0.85 |
| NM_022484    | FLJ13576     | -0.85 | NM_032127 | DKFZP566M1046 | -0.85 |
| NM_144604    | LOC124245    | -0.85 | NM_152408 | FLJ35779      | -0.85 |
| NM_207327    | LOC150383    | -0.85 | NM_152504 | FLJ25067      | -0.85 |
| NM_153702    | MGC10084     | -0.85 | NM_174961 | SSX8          | -0.85 |
| NM_181610    | KRTAP19-4    | -0.85 | NM_182620 | FAM33A        | -0.85 |
| XM_086402    | LOC149018    | -0.85 | XM_293529 | LOC344657     | -0.85 |
| XM_372138    | LOC389786    | -0.85 | XM_374765 | LOC399712     | -0.85 |
| NM_001002925 | OR5AP2       | -0.85 | NM_004570 | PIK3C2G       | -0.84 |
| NM_002860    | PYCS         | -0.84 | NM_005855 | RAMP1         | -0.84 |
| NM_152526    | ALS2CR19     | -0.84 | NM_003528 | HIST2H2BE     | -0.84 |
| NM_020418    | PCBP4        | -0.84 | NM_002160 | TNC           | -0.84 |
| NM_001478    | GALGT        | -0.84 | NM_198834 | ACACA         | -0.84 |
| NM_006357    | UBE2E3       | -0.84 | NM_080677 | DLC2          | -0.84 |
| NM_014784    | ARHGEF11     | -0.84 | NM_002353 | TACSTD2       | -0.84 |
| NM_002618    | PEX13        | -0.84 | NM_005718 | ARPC4         | -0.84 |
| NM_006807    | CBX1         | -0.84 | NM_000883 | IMPDH1        | -0.84 |
| NM_019842    | KCNQ5        | -0.84 | NM_006463 | STAMPB        | -0.84 |
| NM_007362    | NCBP2        | -0.84 | NM_012118 | CCRN4L        | -0.84 |
| NM_020847    | TNRC6        | -0.84 | NM_016607 | ARMCX3        | -0.84 |
| NM_017637    | BNC2         | -0.84 | NM_017539 | DNAH3         | -0.84 |
| NM_020243    | TOMM22       | -0.84 | NM_032479 | MRPL36        | -0.84 |
| NM_023943    | MGC3040      | -0.84 | NM_024764 | C14ORF161     | -0.84 |
| NM_025267    | MGC2744      | -0.84 | NM_031904 | FKSG44        | -0.84 |

|           |               |       |              |              |       |
|-----------|---------------|-------|--------------|--------------|-------|
| NM_030819 | MGC11335      | -0.84 | NM_033342    | TRIM7        | -0.84 |
| NM_080655 | MGC17337      | -0.84 | NM_152279    | ZNF585B      | -0.84 |
| NM_170698 | DJ222E13.2    | -0.84 | NM_152470    | C18ORF23     | -0.84 |
| NM_153611 | MGC20446      | -0.84 | XM_371662    | LOC255330    | -0.84 |
| NM_175903 | LOC284033     | -0.84 | XM_211509    | LOC284527    | -0.84 |
| XM_115897 | LOC203510     | -0.84 | XM_372940    | LOC391403    | -0.84 |
| XM_373001 | LOC391566     | -0.84 | XM_379402    | LOC401242    | -0.84 |
| XM_374432 | LOC392666     | -0.84 | XM_379608    | LOC401480    | -0.84 |
| XM_378993 | LOC400852     | -0.84 | NM_016291    | IHPK2        | -0.83 |
| NM_031220 | PITPNM3       | -0.83 | NM_005793    | NME6         | -0.83 |
| NM_004736 | XPR1          | -0.83 | NM_016734    | PAX5         | -0.83 |
| NM_006473 | TAF6L         | -0.83 | NM_032797    | AMID         | -0.83 |
| NM_002569 | FURIN         | -0.83 | NM_003312    | TST          | -0.83 |
| NM_002717 | PPP2R2A       | -0.83 | NM_002891    | RASGRF1      | -0.83 |
| NM_013409 | FST           | -0.83 | NM_002175    | IFNA21       | -0.83 |
| NM_000040 | APOC3         | -0.83 | NM_014456    | PDCD4        | -0.83 |
| NM_016333 | SRRM2         | -0.83 | NM_001629    | ALOX5AP      | -0.83 |
| NM_001431 | EPB41L2       | -0.83 | NM_021013    | KRTHA4       | -0.83 |
| NM_006228 | PNOC          | -0.83 | NM_015196    | KIAA0922     | -0.83 |
| NM_015633 | FGFR1OP2      | -0.83 | NM_020528    | PCBP3        | -0.83 |
| XM_044921 | KIAA1442      | -0.83 | NM_172231    | SF4          | -0.83 |
| NM_021946 | FLJ11362      | -0.83 | NM_022104    | C20ORF67     | -0.83 |
| NM_024638 | QTRTD1        | -0.83 | NM_025212    | CXXC4        | -0.83 |
| NM_145753 | PHLDB2        | -0.83 | NM_052832    | SLC26A7      | -0.83 |
| NM_130808 | CPNE4         | -0.83 | NM_138479    | LOC148898    | -0.83 |
| NM_152548 | FLJ25333      | -0.83 | NM_174951    | FAM9A        | -0.83 |
| XM_088735 | H2BFWT        | -0.83 | NM_138967    | SCAMP5       | -0.83 |
| NM_145027 | C6ORF102      | -0.83 | XM_170658    | DKFZP762C186 | -0.83 |
| NM_198480 | ZNF615        | -0.83 | NM_177967    | PHGDHL1      | -0.83 |
| XM_375700 | LOC400746     | -0.83 | XM_371817    | LOC389385    | -0.83 |
| XM_373585 | LOC387977     | -0.83 | NM_001005236 | OR1L1        | -0.83 |
| NM_002748 | MAPK6         | -0.82 | NM_002685    | EXOSC10      | -0.82 |
| NM_005424 | TIE           | -0.82 | NM_002922    | RGS1         | -0.82 |
| NM_005527 | HSPA1L        | -0.82 | NM_006106    | YAP1         | -0.82 |
| NM_006963 | ZNF22         | -0.82 | NM_003791    | MBTPS1       | -0.82 |
| NM_005040 | PRCP          | -0.82 | NM_001875    | CPS1         | -0.82 |
| NM_005536 | IMPA1         | -0.82 | NM_020777    | SORCS2       | -0.82 |
| NM_000594 | TNF           | -0.82 | NM_017767    | SLC39A4      | -0.82 |
| NM_139054 | ADAMTS18      | -0.82 | NM_014632    | MICAL2       | -0.82 |
| NM_000454 | SOD1          | -0.82 | NM_005328    | HAS2         | -0.82 |
| NM_000793 | DIO2          | -0.82 | NM_007353    | GNA12        | -0.82 |
| NM_002079 | GOT1          | -0.82 | NM_024409    | NPPC         | -0.82 |
| NM_006993 | NPM3          | -0.82 | NM_015947    | ASCC1        | -0.82 |
| NM_017580 | ZRANB1        | -0.82 | NM_017919    | STX17        | -0.82 |
| NM_018027 | FRMD4         | -0.82 | NM_030963    | RNF146       | -0.82 |
| NM_032256 | DKFZP434K2435 | -0.82 | NM_032564    | DGAT2        | -0.82 |

|              |           |       |              |           |       |
|--------------|-----------|-------|--------------|-----------|-------|
| NM_033085    | FATE      | -0.82 | NM_175736    | FMNL3     | -0.82 |
| NM_199133    | LOC134145 | -0.82 | NM_018083    | ZNF358    | -0.82 |
| NM_152496    | FLJ31434  | -0.82 | NM_207582    | HERV-FRD  | -0.82 |
| NM_152647    | FLJ32800  | -0.82 | NM_153836    | CREG2     | -0.82 |
| NM_194310    | LOC284837 | -0.82 | NM_199243    | GPR150    | -0.82 |
| NM_178428    | LCE2A     | -0.82 | XM_208835    | LOC283767 | -0.82 |
| XM_373349    | LOC392467 | -0.82 | NM_001004330 | FLJ46688  | -0.82 |
| NM_001001696 | FLJ44006  | -0.82 | NM_003467    | CXCR4     | -0.81 |
| NM_198074    | OR2C3     | -0.81 | NM_001554    | CYR61     | -0.81 |
| NM_004658    | RASAL1    | -0.81 | NM_000769    | CYP2C19   | -0.81 |
| NM_005977    | RNF6      | -0.81 | NM_001201    | BMP3      | -0.81 |
| NM_000757    | CSF1      | -0.81 | NM_002687    | PNN       | -0.81 |
| NM_004415    | DSP       | -0.81 | NM_004770    | KCNB2     | -0.81 |
| NM_000898    | MAOB      | -0.81 | NM_006788    | RALBP1    | -0.81 |
| NM_021614    | KCNN2     | -0.81 | NM_021128    | POLR2L    | -0.81 |
| NM_003649    | DDO       | -0.81 | NM_006458    | TRIM3     | -0.81 |
| XM_045308    | PHF19     | -0.81 | NM_019072    | SGTB      | -0.81 |
| NM_018348    | FLJ11171  | -0.81 | NM_020654    | SENP7     | -0.81 |
| NM_020354    | ENTPD7    | -0.81 | NM_021823    | MDS018    | -0.81 |
| NM_022361    | POPDC3    | -0.81 | NM_022895    | FLJ12448  | -0.81 |
| NM_022340    | ZFYVE20   | -0.81 | NM_025004    | FLJ13215  | -0.81 |
| XM_290811    | KIAA1713  | -0.81 | NM_030674    | SLC38A1   | -0.81 |
| NM_032488    | LOC84518  | -0.81 | NM_032499    | HH114     | -0.81 |
| NM_052910    | SLITRK1   | -0.81 | NM_181706    | LOC120526 | -0.81 |
| XM_378175    | LOC124446 | -0.81 | NM_145650    | MUC15     | -0.81 |
| NM_152551    | C6ORF151  | -0.81 | NM_152550    | SH3RF2    | -0.81 |
| NM_152697    | MGC34032  | -0.81 | NM_153612    | HS3ST5    | -0.81 |
| XM_379086    | LOC285045 | -0.81 | XM_290831    | LOC339321 | -0.81 |
| XM_497067    | OR7E31P   | -0.81 | XM_373885    | LOC388735 | -0.81 |
| XM_173132    | LOC255620 | -0.81 | XM_088367    | LOC157708 | -0.81 |
| XM_379072    | LOC400939 | -0.81 | XM_374254    | LOC389636 | -0.81 |
| XM_378742    | LOC400645 | -0.81 | NM_001005922 | KRTAP5-1  | -0.81 |
| NM_002565    | P2RY4     | -0.8  | NM_002551    | OR3A2     | -0.8  |
| NM_003777    | DNAH11    | -0.8  | NM_030665    | RAI1      | -0.8  |
| NM_002473    | MYH9      | -0.8  | NM_052884    | SIGLEC11  | -0.8  |
| NM_001385    | DPYS      | -0.8  | NM_006044    | HDAC6     | -0.8  |
| NM_014336    | AIPL1     | -0.8  | NM_000565    | IL6R      | -0.8  |
| NM_003728    | UNC5C     | -0.8  | NM_013246    | CLC       | -0.8  |
| NM_001302    | CORT      | -0.8  | NM_003673    | TCAP      | -0.8  |
| NM_006020    | ALKBH     | -0.8  | NM_002048    | GAS1      | -0.8  |
| NM_001817    | CEACAM4   | -0.8  | NM_002799    | PSMB7     | -0.8  |
| NM_003271    | TM4SF7    | -0.8  | NM_006703    | NUDT3     | -0.8  |
| NM_015440    | FTHFSDC1  | -0.8  | NM_014017    | MAPBPIP   | -0.8  |
| NM_015662    | SLB       | -0.8  | NM_016429    | COPZ2     | -0.8  |
| NM_013334    | GMPPB     | -0.8  | NM_020358    | RNF18     | -0.8  |
| NM_020390    | EIF5A2    | -0.8  | XM_114432    | ZNF608    | -0.8  |

|           |               |       |           |               |       |
|-----------|---------------|-------|-----------|---------------|-------|
| NM_024712 | ELMO3         | -0.8  | NM_024577 | KIAA1985      | -0.8  |
| NM_025137 | FLJ21439      | -0.8  | NM_025264 | THUMPD2       | -0.8  |
| NM_025163 | SMP3          | -0.8  | NM_032141 | DKFZP434K1421 | -0.8  |
| NM_030944 | C15ORF5       | -0.8  | NM_032118 | FLJ12953      | -0.8  |
| NM_032899 | BJ-TSA-9      | -0.8  | NM_138408 | C6ORF51       | -0.8  |
| NM_033036 | GAL3ST3       | -0.8  | NM_138419 | DUFD1         | -0.8  |
| NM_172193 | KLHDC1        | -0.8  | XM_088331 | LOC157570     | -0.8  |
| NM_205548 | UNQ9217       | -0.8  | NM_198276 | TMEM17        | -0.8  |
| NM_182598 | FLJ36980      | -0.8  | XM_370948 | LOC388228     | -0.8  |
| NM_207406 | FLJ43965      | -0.8  | NM_019110 | ZNF307        | -0.8  |
| XM_372258 | LOC389899     | -0.8  | XM_371431 | LOC388854     | -0.8  |
| NM_005192 | CDKN3         | -0.79 | NM_005734 | HIPK3         | -0.79 |
| NM_006904 | PRKDC         | -0.79 | NM_032781 | PTPN5         | -0.79 |
| NM_006852 | TLK2          | -0.79 | NM_005507 | CFL1          | -0.79 |
| NM_005780 | LHFP          | -0.79 | XM_371380 | S100A13       | -0.79 |
| NM_021212 | ZF            | -0.79 | NM_005551 | KLK2          | -0.79 |
| NM_014936 | ENPP4         | -0.79 | NM_005943 | MOCS1         | -0.79 |
| NM_000512 | GALNS         | -0.79 | NM_001141 | ALOX15B       | -0.79 |
| NM_002116 | HLA-A         | -0.79 | NM_000206 | IL2RG         | -0.79 |
| NM_016113 | TRPV2         | -0.79 | NM_002203 | ITGA2         | -0.79 |
| NM_002356 | MARCKS        | -0.79 | NM_013385 | PSCD4         | -0.79 |
| NM_001543 | NDST1         | -0.79 | NM_000846 | GSTA2         | -0.79 |
| NM_021016 | PSG3          | -0.79 | NM_006743 | RBM3          | -0.79 |
| NM_003490 | SYN3          | -0.79 | NM_006771 | KRTHA8        | -0.79 |
| NM_006118 | HAX1          | -0.79 | NM_020997 | LEFTB         | -0.79 |
| NM_014467 | SRPUL         | -0.79 | NM_013293 | TRA2A         | -0.79 |
| NM_017434 | DUOX1         | -0.79 | NM_019082 | DDX56         | -0.79 |
| NM_020395 | LOC57117      | -0.79 | NM_198945 | ALS2CR17      | -0.79 |
| NM_024045 | DDX50         | -0.79 | XM_370878 | KIAA2002      | -0.79 |
| NM_025103 | CCDC2         | -0.79 | NM_032188 | MYST1         | -0.79 |
| NM_138461 | LOC116211     | -0.79 | NM_177478 | MTF           | -0.79 |
| NM_144645 | MGC26744      | -0.79 | XM_375033 | LOC144776     | -0.79 |
| NM_173507 | FLJ37118      | -0.79 | XM_016548 | CDY           | -0.79 |
| XM_175125 | DKFZP434P0216 | -0.79 | NM_182567 | FLJ34690      | -0.79 |
| NM_201628 | FLJ43806      | -0.79 | XM_293401 | LOC347527     | -0.79 |
| XM_373854 | LOC388652     | -0.79 | XM_374173 | LOC389409     | -0.79 |
| XM_379483 | LOC401321     | -0.79 | XM_377835 | LOC402168     | -0.79 |
| XM_374266 | LOC389650     | -0.79 | XM_372319 | LOC389983     | -0.79 |
| XM_370582 | LOC387718     | -0.79 | NM_007174 | CIT           | -0.78 |
| NM_021120 | DLG3          | -0.78 | NM_007264 | ADMR          | -0.78 |
| NM_003390 | WEE1          | -0.78 | NM_006374 | STK25         | -0.78 |
| NM_012352 | OR1A2         | -0.78 | NM_032951 | WBSCR14       | -0.78 |
| NM_001179 | ART3          | -0.78 | NM_000946 | PRIM1         | -0.78 |
| NM_000203 | IDUA          | -0.78 | NM_006034 | TP53I11       | -0.78 |
| NM_032738 | FREB          | -0.78 | NM_004979 | KCND1         | -0.78 |
| NM_001251 | CD68          | -0.78 | NM_012394 | PFDN2         | -0.78 |

|           |               |       |              |              |       |
|-----------|---------------|-------|--------------|--------------|-------|
| NM_004507 | HUS1          | -0.78 | NM_003104    | SORD         | -0.78 |
| NM_002396 | ME2           | -0.78 | NM_001018    | RPS15        | -0.78 |
| NM_004245 | TGM5          | -0.78 | NM_006820    | C1ORF29      | -0.78 |
| NM_007280 | OIP5          | -0.78 | NM_012392    | PEF          | -0.78 |
| NM_152692 | C1GALT2       | -0.78 | NM_016623    | BM-009       | -0.78 |
| NM_019018 | FLJ11127      | -0.78 | NM_016488    | PPHLN1       | -0.78 |
| NM_017559 | DKFZP434H2215 | -0.78 | NM_019605    | SERTAD4      | -0.78 |
| NM_020748 | KIAA1287      | -0.78 | NM_024643    | C14ORF140    | -0.78 |
| NM_024841 | FLJ14213      | -0.78 | NM_032262    | DKFZP434N035 | -0.78 |
| NM_133367 | C6ORF33       | -0.78 | XM_371605    | LOC151174    | -0.78 |
| NM_198275 | LOC196264     | -0.78 | NM_145030    | MGC22793     | -0.78 |
| NM_174925 | LOC205251     | -0.78 | NM_032436    | C13ORF8      | -0.78 |
| XM_209073 | LOC284207     | -0.78 | NM_182625    | FLJ40869     | -0.78 |
| XM_295865 | LOC340895     | -0.78 | XM_294960    | LOC339453    | -0.78 |
| XM_293828 | LOC345462     | -0.78 | XM_374086    | LOC389224    | -0.78 |
| XM_377836 | LOC402169     | -0.78 | XM_373908    | LOC388789    | -0.78 |
| NM_002731 | PRKACB        | -0.77 | NM_000679    | ADRA1B       | -0.77 |
| NM_003745 | SOCS1         | -0.77 | NM_005300    | GPR34        | -0.77 |
| NM_019599 | TAS2R1        | -0.77 | NM_005186    | CAPN1        | -0.77 |
| NM_003132 | SRM           | -0.77 | NM_004637    | RAB7         | -0.77 |
| NM_013282 | UHRF1         | -0.77 | NM_017514    | PLXNA3       | -0.77 |
| NM_002845 | PTPRM         | -0.77 | NM_006628    | ARPP-19      | -0.77 |
| NM_020655 | JPH3          | -0.77 | NM_005236    | ERCC4        | -0.77 |
| NM_014922 | NALP1         | -0.77 | NM_001688    | ATP5F1       | -0.77 |
| NM_005663 | WHSC2         | -0.77 | NM_004939    | DDX1         | -0.77 |
| NM_006901 | MYO9A         | -0.77 | NM_003446    | ZNF157       | -0.77 |
| XM_045581 | AZI1          | -0.77 | NM_012265    | C22ORF3      | -0.77 |
| XM_376310 | ZCCHC4        | -0.77 | NM_016101    | CGI-37       | -0.77 |
| NM_016023 | CGI-77        | -0.77 | NM_016258    | YTHDF2       | -0.77 |
| NM_017838 | NOLA2         | -0.77 | NM_018335    | C14ORF131    | -0.77 |
| NM_020379 | MAN1C1        | -0.77 | NM_024715    | C5ORF14      | -0.77 |
| NM_024725 | FLJ23518      | -0.77 | NM_024650    | FLJ22531     | -0.77 |
| NM_030568 | C6ORF148      | -0.77 | NM_031962    | KRTAP9-3     | -0.77 |
| NM_053280 | ODF3          | -0.77 | NM_207319    | FLJ32867     | -0.77 |
| NM_144718 | LOC152185     | -0.77 | NM_181713    | UBXD4        | -0.77 |
| NM_145294 | LOC197336     | -0.77 | NM_145011    | ZNF25        | -0.77 |
| NM_153256 | C10ORF47      | -0.77 | NM_172370    | DAOA         | -0.77 |
| NM_198924 | TRIM50B       | -0.77 | NM_005866    | OPRS1        | -0.77 |
| XM_062269 | LOC120793     | -0.77 | XM_372840    | LOC391209    | -0.77 |
| XM_370845 | LOC388097     | -0.77 | NM_001002758 | PRY2         | -0.77 |
| NM_004942 | DEFB4         | -0.76 | NM_002548    | OR1D2        | -0.76 |
| NM_014430 | CIDEB         | -0.76 | NM_176821    | NALP10       | -0.76 |
| NM_002603 | PDE7A         | -0.76 | NM_004111    | FEN1         | -0.76 |
| NM_005213 | CSTA          | -0.76 | NM_020438    | DOLPP1       | -0.76 |
| NM_006274 | CCL19         | -0.76 | NM_020389    | TRPC7        | -0.76 |
| NM_003639 | IKBK          | -0.76 | NM_018834    | MATR3        | -0.76 |



|           |           |       |              |              |       |
|-----------|-----------|-------|--------------|--------------|-------|
| NM_001985 | ETFB      | -0.76 | NM_014252    | SLC25A15     | -0.76 |
| NM_004750 | CRLF1     | -0.76 | NM_001317    | CSH1         | -0.76 |
| NM_004701 | CCNB2     | -0.76 | NM_080612    | GAB3         | -0.76 |
| NM_024735 | FBXO31    | -0.76 | NM_001001655 | MGC90512     | -0.76 |
| NM_001267 | CHAD      | -0.76 | NM_002216    | ITIH2        | -0.76 |
| NM_006161 | NEUROG1   | -0.76 | NM_004278    | PIGL         | -0.76 |
| NM_007063 | TBC1D8    | -0.76 | NM_006867    | RBPMS        | -0.76 |
| NM_020368 | SAS10     | -0.76 | NM_024920    | FLJ14281     | -0.76 |
| NM_032316 | NICN1     | -0.76 | XM_040592    | ZNF469       | -0.76 |
| NM_032597 | NYD-SP21  | -0.76 | NM_033100    | PCDH21       | -0.76 |
| NM_152665 | FLJ40873  | -0.76 | NM_182833    | LOC220032    | -0.76 |
| NM_145006 | SUSD3     | -0.76 | NM_152722    | FLJ25530     | -0.76 |
| NM_173662 | LOC285533 | -0.76 | NM_173621    | FLJ34790     | -0.76 |
| NM_181722 | LOC285908 | -0.76 | NM_182489    | LOC346673    | -0.76 |
| NM_178019 | CATSPER3  | -0.76 | XM_379642    | LOC401528    | -0.76 |
| XM_379635 | LOC401506 | -0.76 | NM_172207    | CAMKK1       | -0.75 |
| NM_019884 | GSK3A     | -0.75 | NM_002072    | GNAQ         | -0.75 |
| NM_181885 | GPR100    | -0.75 | NM_176883    | TAS2R41      | -0.75 |
| NM_005435 | ARHGEF5   | -0.75 | NM_002656    | PLAGL1       | -0.75 |
| NM_001352 | DBP       | -0.75 | NM_024865    | NANOG        | -0.75 |
| NM_005685 | GTF2IRD1  | -0.75 | NM_003927    | MBD2         | -0.75 |
| NM_003367 | USF2      | -0.75 | NM_005485    | ADPRTL3      | -0.75 |
| NM_000859 | HMGCR     | -0.75 | NM_139318    | KCNH5        | -0.75 |
| NM_004228 | PSCD2     | -0.75 | NM_006846    | SPINK5       | -0.75 |
| NM_005581 | LU        | -0.75 | NM_000417    | IL2RA        | -0.75 |
| NM_002438 | MRC1      | -0.75 | NM_006019    | TCIRG1       | -0.75 |
| NM_000352 | ABCC8     | -0.75 | NM_015434    | DKFZP434B168 | -0.75 |
| NM_006317 | BASP1     | -0.75 | NM_145237    | LOC94431     | -0.75 |
| NM_001313 | CRMP1     | -0.75 | NM_024014    | HOXA6        | -0.75 |
| NM_006513 | SARS      | -0.75 | NM_003740    | KCNK5        | -0.75 |
| NM_014661 | KIAA0140  | -0.75 | XM_375729    | C1ORF34      | -0.75 |
| NM_015380 | CGI-51    | -0.75 | NM_014145    | C20ORF30     | -0.75 |
| NM_016369 | CLDN18    | -0.75 | NM_021260    | ZFYVE1       | -0.75 |
| NM_017429 | BCMO1     | -0.75 | NM_017631    | FLJ20035     | -0.75 |
| NM_018327 | C20ORF38  | -0.75 | NM_194071    | CREB3L2      | -0.75 |
| NM_023074 | FLJ12644  | -0.75 | NM_025241    | UBXD1        | -0.75 |
| NM_025257 | C6ORF29   | -0.75 | NM_024832    | RIN3         | -0.75 |
| NM_025108 | FLJ13909  | -0.75 | NM_031482    | APG10L       | -0.75 |
| NM_032599 | NYD-SP18  | -0.75 | NM_052873    | MGC16028     | -0.75 |
| XM_373731 | KRTAP4-9  | -0.75 | NM_030631    | SLC25A21     | -0.75 |
| NM_152319 | MGC35033  | -0.75 | NM_182485    | CPEB2        | -0.75 |
| NM_173519 | MGC34646  | -0.75 | NM_178508    | MGC57858     | -0.75 |
| NM_173588 | FLJ37794  | -0.75 | XM_171032    | LOC255812    | -0.75 |
| NM_207400 | FLJ39739  | -0.75 | XM_371139    | FLJ14959     | -0.75 |
| NM_178566 | ZDHHC21   | -0.75 | NM_207428    | FLJ45212     | -0.75 |
| XM_059267 | LOC128710 | -0.75 | XM_210826    | LOC286404    | -0.75 |

|              |           |       |              |           |       |
|--------------|-----------|-------|--------------|-----------|-------|
| XM_167275    | LOC222901 | -0.75 | XM_294634    | LOC340268 | -0.75 |
| XM_376795    | LOC401478 | -0.75 | XM_370707    | LOC387890 | -0.75 |
| XM_378434    | LOC400161 | -0.75 | XM_373368    | LOC392533 | -0.75 |
| NM_001002906 | XKRY2     | -0.75 | NM_001005566 | OR5B2     | -0.75 |
| NM_003948    | CDKL2     | -0.74 | NM_004154    | P2RY6     | -0.74 |
| NM_006219    | PIK3CB    | -0.74 | XM_378929    | KIAA0663  | -0.74 |
| NM_005709    | USH1C     | -0.74 | NM_006079    | CITED2    | -0.74 |
| NM_017420    | SIX4      | -0.74 | NM_002877    | RAD51L1   | -0.74 |
| NM_006502    | POLH      | -0.74 | NM_003855    | IL18R1    | -0.74 |
| NM_002560    | P2RX4     | -0.74 | XM_377014    | ARHGEF9   | -0.74 |
| NM_013230    | CD24      | -0.74 | NM_001207    | BTF3      | -0.74 |
| NM_002230    | JUP       | -0.74 | NM_012282    | KCNE1L    | -0.74 |
| NM_015894    | STMN3     | -0.74 | NM_002633    | PGM1      | -0.74 |
| XM_035572    | C4ORF9    | -0.74 | NM_005445    | CSPG6     | -0.74 |
| XM_376328    | FAM13A1   | -0.74 | NM_006859    | LIAS      | -0.74 |
| NM_014480    | ZNF544    | -0.74 | XM_039676    | KIAA1240  | -0.74 |
| NM_018139    | C14ORF104 | -0.74 | NM_018418    | SPATA7    | -0.74 |
| NM_019107    | C19ORF10  | -0.74 | NM_020708    | SLC12A5   | -0.74 |
| NM_022156    | PP3111    | -0.74 | NM_024740    | DIBD1     | -0.74 |
| NM_024664    | FLJ11838  | -0.74 | XM_371740    | ELOVL7    | -0.74 |
| NM_152283    | ZFP62     | -0.74 | NM_022083    | C1ORF24   | -0.74 |
| NM_194251    | GPR151    | -0.74 | NM_080830    | CST11     | -0.74 |
| NM_152556    | FLJ31818  | -0.74 | XM_087384    | LOC152098 | -0.74 |
| NM_152580    | FLJ32742  | -0.74 | NM_153371    | LNX2      | -0.74 |
| NM_173589    | FLJ35709  | -0.74 | XM_370613    | LOC387755 | -0.74 |
| XM_373562    | LOC387917 | -0.74 | XM_373636    | LOC388140 | -0.74 |
| XM_372663    | LOC390777 | -0.74 | NM_001001691 | FLJ44790  | -0.74 |
| NM_214710    | PRSSL1    | -0.74 | NM_002654    | PKM2      | -0.73 |
| NM_000798    | DRD5      | -0.73 | NM_002944    | ROS1      | -0.73 |
| NM_012474    | UMPK      | -0.73 | NM_002926    | RGS12     | -0.73 |
| NM_001940    | DRPLA     | -0.73 | NM_019619    | PARD3     | -0.73 |
| NM_006383    | CIB2      | -0.73 | NM_021151    | CROT      | -0.73 |
| NM_005657    | TP53BP1   | -0.73 | NM_000234    | LIG1      | -0.73 |
| NM_021129    | PP        | -0.73 | NM_003947    | KALRN     | -0.73 |
| NM_002342    | LTBR      | -0.73 | NM_000319    | PEX5      | -0.73 |
| NM_007123    | USH2A     | -0.73 | NM_004632    | DAP3      | -0.73 |
| NM_000611    | CD59      | -0.73 | NM_004233    | CD83      | -0.73 |
| NM_006894    | FMO3      | -0.73 | NM_024430    | PSTPIP2   | -0.73 |
| NM_001030    | RPS27     | -0.73 | NM_015488    | MR-1      | -0.73 |
| NM_005017    | PCYT1A    | -0.73 | NM_014279    | OLFM1     | -0.73 |
| NM_148921    | EPN2      | -0.73 | NM_012205    | HAAO      | -0.73 |
| NM_006588    | SULT1C2   | -0.73 | NM_015640    | PAI-RBP1  | -0.73 |
| NM_012388    | PLDN      | -0.73 | NM_017510    | HSGP25L2G | -0.73 |
| NM_197958    | FLJ11196  | -0.73 | XM_375087    | PLEKHH1   | -0.73 |
| XM_038567    | MTA3      | -0.73 | NM_024812    | BAALC     | -0.73 |
| NM_032271    | TRAF7     | -0.73 | NM_057161    | KLHDC3    | -0.73 |

|           |           |       |           |               |       |
|-----------|-----------|-------|-----------|---------------|-------|
| NM_138290 | RPIB9     | -0.73 | NM_015243 | COH1          | -0.73 |
| XM_370769 | LOC161394 | -0.73 | NM_153244 | C10ORF111     | -0.73 |
| NM_153184 | IGSF4D    | -0.73 | NM_203424 | LOC389123     | -0.73 |
| XM_294997 | LOC339541 | -0.73 | XM_042178 | LOC152015     | -0.73 |
| XM_294666 | LOC338616 | -0.73 | XM_374025 | LOC389077     | -0.73 |
| XM_372979 | LOC391498 | -0.73 | XM_372838 | LOC391205     | -0.73 |
| XM_379668 | LOC401552 | -0.73 | XM_378625 | LOC400553     | -0.73 |
| XM_371026 | LOC388351 | -0.73 | XM_375634 | LOC400709     | -0.73 |
| XM_379023 | LOC400876 | -0.73 | XM_042066 | MAP3K1        | -0.72 |
| NM_031432 | UCK1      | -0.72 | NM_000845 | GRM8          | -0.72 |
| NM_023920 | TAS2R13   | -0.72 | NM_006569 | CGREF1        | -0.72 |
| NM_053281 | DACH2     | -0.72 | NM_006479 | PIR51         | -0.72 |
| NM_003406 | YWHAZ     | -0.72 | NM_033029 | LMLN          | -0.72 |
| NM_004582 | RABGGTB   | -0.72 | NM_001842 | CNTFR         | -0.72 |
| NM_170743 | IL28RA    | -0.72 | NM_004242 | HMG3          | -0.72 |
| NM_002208 | ITGAE     | -0.72 | NM_000744 | CHRNA4        | -0.72 |
| NM_001847 | COL4A6    | -0.72 | NM_019644 | ANKRD7        | -0.72 |
| NM_002233 | KCNA4     | -0.72 | NM_023929 | ZBTB10        | -0.72 |
| NM_004988 | MAGEA1    | -0.72 | NM_003441 | ZNF141        | -0.72 |
| NM_003296 | CRISP2    | -0.72 | NM_004712 | HGS           | -0.72 |
| NM_014690 | KIAA0773  | -0.72 | NM_006803 | AP3M2         | -0.72 |
| NM_013325 | APG4B     | -0.72 | NM_170601 | CSE-C         | -0.72 |
| NM_017516 | RAB39     | -0.72 | NM_018421 | TBC1D2        | -0.72 |
| NM_019091 | PLEKHA3   | -0.72 | NM_023926 | FLJ12895      | -0.72 |
| NM_024814 | CBLL1     | -0.72 | NM_030645 | KIAA1720      | -0.72 |
| NM_025109 | MYOHD1    | -0.72 | NM_032233 | C14ORF154     | -0.72 |
| NM_198443 | UNQ2446   | -0.72 | NM_144611 | MGC32124      | -0.72 |
| NM_178858 | SFXN2     | -0.72 | NM_174899 | FBXO36        | -0.72 |
| NM_080748 | C20ORF52  | -0.72 | XM_088566 | KIAA1958      | -0.72 |
| NM_174921 | LOC201895 | -0.72 | NM_173800 | FLJ90650      | -0.72 |
| NM_198281 | LOC285513 | -0.72 | NM_182585 | DKFZP451M2119 | -0.72 |
| XM_376212 | LOC339862 | -0.72 | NM_014788 | TRIM14        | -0.72 |
| XM_376902 | LOC401548 | -0.72 | XM_374817 | LOC399788     | -0.72 |
| XM_374326 | LOC389858 | -0.72 | NM_015533 | DKFZP586B1621 | -0.71 |
| NM_032409 | PINK1     | -0.71 | NM_000025 | ADRB3         | -0.71 |
| NM_002440 | MSH4      | -0.71 | XM_290809 | TAF4B         | -0.71 |
| NM_012482 | ZNF281    | -0.71 | NM_000545 | TCF1          | -0.71 |
| NM_000690 | ALDH2     | -0.71 | NM_003753 | EIF3S7        | -0.71 |
| NM_016216 | DBR1      | -0.71 | NM_000237 | LPL           | -0.71 |
| NM_002838 | PTPRC     | -0.71 | NM_006990 | WASF2         | -0.71 |
| NM_012098 | ANGPTL2   | -0.71 | NM_015848 | HUMCYT2A      | -0.71 |
| NM_170707 | LMNA      | -0.71 | NM_025134 | CHD9          | -0.71 |
| NM_000134 | FABP2     | -0.71 | NM_020967 | NCOA5         | -0.71 |
| NM_005843 | STAM2     | -0.71 | NM_006005 | WFS1          | -0.71 |
| NM_002245 | KCNK1     | -0.71 | NM_003119 | SPG7          | -0.71 |
| NM_004600 | SSA2      | -0.71 | NM_015919 | ZNF226        | -0.71 |

|           |           |       |           |              |       |
|-----------|-----------|-------|-----------|--------------|-------|
| NM_006586 | TNRC5     | -0.71 | NM_014043 | DKFZP564O123 | -0.71 |
| NM_018561 | USP49     | -0.71 | NM_013356 | SLC16A8      | -0.71 |
| NM_016436 | C20ORF104 | -0.71 | NM_017858 | FLJ20516     | -0.71 |
| NM_020378 | KLP1      | -0.71 | NM_019843 | EIF4ENIF1    | -0.71 |
| NM_017519 | ARID1B    | -0.71 | NM_022168 | MDA5         | -0.71 |
| NM_024068 | MGC2731   | -0.71 | XM_376680 | KIAA1718     | -0.71 |
| NM_025236 | RNF39     | -0.71 | NM_032168 | FLJ12519     | -0.71 |
| NM_033439 | C9ORF26   | -0.71 | NM_080654 | NY-REN-41    | -0.71 |
| NM_020896 | OSBPL5    | -0.71 | NM_052868 | IGSF8        | -0.71 |
| NM_139169 | TRUB1     | -0.71 | XM_097265 | LOC147670    | -0.71 |
| NM_153269 | C20ORF96  | -0.71 | XM_087928 | LOC154449    | -0.71 |
| NM_145301 | LOC201158 | -0.71 | XM_378951 | LOC284628    | -0.71 |
| NM_207349 | LOC284739 | -0.71 | NM_207356 | LOC339448    | -0.71 |
| XM_379459 | LOC401289 | -0.71 | XM_372726 | LOC390927    | -0.71 |
| XM_373715 | LOC388340 | -0.71 | NM_003647 | DGKE         | -0.7  |
| NM_002020 | FLT4      | -0.7  | NM_016440 | VRK3         | -0.7  |
| NM_019012 | PEPP2     | -0.7  | NM_000332 | SCA1         | -0.7  |
| NM_004837 | GGPS1     | -0.7  | NM_000401 | EXT2         | -0.7  |
| NM_002372 | MAN2A1    | -0.7  | NM_000884 | IMPDH2       | -0.7  |
| NM_000954 | PTGDS     | -0.7  | NM_001110 | ADAM10       | -0.7  |
| NM_007102 | GUCA2B    | -0.7  | NM_030912 | TRIM8        | -0.7  |
| NM_003145 | SSR2      | -0.7  | NM_022342 | KIF9         | -0.7  |
| NM_004633 | IL1R2     | -0.7  | NM_006181 | NTN2L        | -0.7  |
| NM_003003 | SEC14L1   | -0.7  | NM_000035 | ALDOB        | -0.7  |
| NM_000336 | SCNN1B    | -0.7  | NM_004063 | CDH17        | -0.7  |
| NM_152945 | DRB1      | -0.7  | NM_024830 | FLJ12443     | -0.7  |
| NM_005317 | GZMM      | -0.7  | NM_004616 | TM4SF3       | -0.7  |
| NM_003905 | APPBP1    | -0.7  | NM_014719 | KIAA0738     | -0.7  |
| NM_006351 | TIMM44    | -0.7  | NM_015346 | ZFYVE26      | -0.7  |
| NM_018125 | FLJ10521  | -0.7  | NM_021219 | JAM2         | -0.7  |
| NM_021174 | DBC-1     | -0.7  | XM_046581 | ZSWIM5       | -0.7  |
| NM_025044 | BICC1     | -0.7  | NM_031466 | T1           | -0.7  |
| NM_031490 | LONP      | -0.7  | NM_033413 | MGC16309     | -0.7  |
| NM_183075 | CYP2U1    | -0.7  | NM_138431 | LOC113655    | -0.7  |
| NM_033396 | TNKS1BP1  | -0.7  | NM_052854 | CREB3L1      | -0.7  |
| NM_138436 | LOC114926 | -0.7  | NM_013329 | C21ORF66     | -0.7  |
| NM_080764 | SUHW2     | -0.7  | NM_133468 | BMPER        | -0.7  |
| XM_209640 | LOC285501 | -0.7  | XM_290838 | LOC339324    | -0.7  |
| NM_181787 | LOC286148 | -0.7  | XM_295097 | LOC339902    | -0.7  |
| XM_376318 | LOC401132 | -0.7  | XM_379817 | LOC402487    | -0.7  |
| XM_373315 | LOC392390 | -0.7  | XM_378350 | LOC400027    | -0.7  |
| XM_373909 | LOC388790 | -0.7  | NM_004517 | ILK          | -0.69 |
| NM_002376 | MARK3     | -0.69 | NM_001703 | BAI2         | -0.69 |
| NM_005470 | ABI1      | -0.69 | NM_000529 | MC2R         | -0.69 |
| NM_015508 | TIPARP    | -0.69 | NM_000892 | KLKB1        | -0.69 |
| NM_022051 | EGLN1     | -0.69 | NM_001145 | ANG          | -0.69 |

|              |           |       |           |           |       |
|--------------|-----------|-------|-----------|-----------|-------|
| NM_000448    | RAG1      | -0.69 | NM_012419 | RGS17     | -0.69 |
| NM_000689    | ALDH1A1   | -0.69 | NM_003842 | TNFRSF10B | -0.69 |
| NM_022835    | PLEKHG2   | -0.69 | NM_018147 | FAIM      | -0.69 |
| NM_003392    | WNT5A     | -0.69 | NM_001859 | SLC31A1   | -0.69 |
| NM_004373    | COX6A1    | -0.69 | NM_001891 | CSN2      | -0.69 |
| NM_000777    | CYP3A5    | -0.69 | NM_001533 | HNRPL     | -0.69 |
| NM_006148    | LASP1     | -0.69 | NM_173710 | MTND3     | -0.69 |
| NM_080658    | ACY-3     | -0.69 | NM_006030 | CACNA2D2  | -0.69 |
| NM_012291    | ESPL1     | -0.69 | NM_014686 | KIAA0355  | -0.69 |
| XM_375812    | KIAA0907  | -0.69 | NM_015317 | PUM2      | -0.69 |
| NM_015461    | ZNF521    | -0.69 | NM_012458 | TIMM13    | -0.69 |
| XM_373313    | OR1J5     | -0.69 | NM_016518 | PIPOX     | -0.69 |
| NM_019052    | C6ORF18   | -0.69 | NM_016098 | BRP44L    | -0.69 |
| NM_018301    | FLJ11016  | -0.69 | NM_017546 | C2ORF29   | -0.69 |
| NM_020706    | SFRS15    | -0.69 | NM_020890 | KIAA1524  | -0.69 |
| NM_024660    | FLJ22573  | -0.69 | NM_033407 | DOCK7     | -0.69 |
| NM_138459    | C6ORF68   | -0.69 | NM_144600 | FLJ31153  | -0.69 |
| NM_153377    | LRIG3     | -0.69 | XM_060970 | PRRXL1    | -0.69 |
| NM_175054    | HIST4H4   | -0.69 | NM_183239 | GSTO2     | -0.69 |
| NM_153211    | C18ORF17  | -0.69 | NM_153456 | HS6ST3    | -0.69 |
| XM_379384    | LOC285766 | -0.69 | XM_378196 | FLJ36112  | -0.69 |
| XM_378207    | LOC338588 | -0.69 | XM_293092 | GPR148    | -0.69 |
| NM_005995    | TBX10     | -0.69 | NM_003516 | HIST2H2AA | -0.69 |
| NM_203306    | MGC39606  | -0.69 | XM_371488 | LOC388939 | -0.69 |
| XM_374167    | LOC389390 | -0.69 | XM_376586 | LOC401314 | -0.69 |
| XM_378280    | LOC399876 | -0.69 | XM_373533 | LOC387859 | -0.69 |
| XM_378805    | LOC400701 | -0.69 | XM_370934 | LOC388210 | -0.69 |
| NM_001004340 | LOC440607 | -0.69 | XM_376001 | LOC400921 | -0.69 |
| NM_001002910 | CYP2D7P1  | -0.69 | NM_020965 | MAGI-3    | -0.68 |
| XM_060316    | OR2T1     | -0.68 | NM_005054 | RANBP2L1  | -0.68 |
| NM_005432    | XRCC3     | -0.68 | NM_014247 | RAPGEF2   | -0.68 |
| NM_004416    | DTX1      | -0.68 | XM_291314 | FBXO10    | -0.68 |
| NM_012174    | FBXW8     | -0.68 | NM_006612 | KIF1C     | -0.68 |
| NM_003800    | RNGTT     | -0.68 | NM_012275 | IL1F5     | -0.68 |
| NM_001244    | TNFSF8    | -0.68 | NM_006409 | ARPC1A    | -0.68 |
| NM_000515    | GH1       | -0.68 | NM_002398 | MEIS1     | -0.68 |
| NM_004668    | MGAM      | -0.68 | NM_052925 | LENG8     | -0.68 |
| NM_000200    | HTN3      | -0.68 | NM_005509 | DMXL1     | -0.68 |
| NM_005275    | GNL1      | -0.68 | NM_002652 | PIP       | -0.68 |
| NM_005949    | MT1F      | -0.68 | NM_018477 | ACTR10    | -0.68 |
| NM_021026    | RFPL1     | -0.68 | NM_003407 | ZFP36     | -0.68 |
| NM_007159    | SLMAP     | -0.68 | NM_004234 | ZNF235    | -0.68 |
| NM_014699    | KIAA0296  | -0.68 | NM_014735 | PHF16     | -0.68 |
| NM_006385    | ZNF211    | -0.68 | NM_014950 | ZBTB1     | -0.68 |
| NM_025154    | UNC84A    | -0.68 | NM_014320 | HEBP2     | -0.68 |
| NM_012322    | LSM5      | -0.68 | NM_015569 | DNM3      | -0.68 |

|           |                   |       |           |               |       |
|-----------|-------------------|-------|-----------|---------------|-------|
| NM_013343 | LOH3CR2A          | -0.68 | NM_019039 | DDX4          | -0.68 |
| NM_018231 | FLJ10815          | -0.68 | NM_018996 | KIAA1582      | -0.68 |
| NM_020964 | KIAA1632          | -0.68 | NM_024091 | MGC5297       | -0.68 |
| NM_025129 | FLJ22688          | -0.68 | NM_032831 | C7ORF19       | -0.68 |
| NM_031306 | DKFZP564B1023     | -0.68 | NM_031421 | DKFZP434H0115 | -0.68 |
| XM_027074 | L3MBTL3           | -0.68 | NM_199249 | MGC13170      | -0.68 |
| XM_030559 | PARD6B            | -0.68 | NM_032926 | MGC15737      | -0.68 |
| NM_052872 | IL17F             | -0.68 | NM_152400 | FLJ39370      | -0.68 |
| NM_172003 | CBWD2             | -0.68 | NM_153223 | FLJ36090      | -0.68 |
| NM_032627 | SSBP4             | -0.68 | NM_145029 | C6ORF136      | -0.68 |
| NM_173852 | KRTCAP2           | -0.68 | NM_181843 | NUDT8         | -0.68 |
| XM_371388 | DKFZP434D177-LIKE | -0.68 | XM_370925 | LOC283951     | -0.68 |
| NM_198687 | KRTAP18-4         | -0.68 | XM_115715 | LOC200493     | -0.68 |
| XM_211995 | LOC285721         | -0.68 | XM_373587 | LOC387981     | -0.68 |
| XM_378462 | LOC400221         | -0.68 | XM_378317 | LOC399961     | -0.68 |
| XM_371118 | LOC388478         | -0.68 | NM_020341 | PAK7          | -0.67 |
| NM_002849 | PTPRR             | -0.67 | NM_001741 | CALCA         | -0.67 |
| NM_003600 | STK6              | -0.67 | NM_080865 | GPR62         | -0.67 |
| NM_004624 | VIPR1             | -0.67 | NM_001607 | ACAA1         | -0.67 |
| NM_000505 | F12               | -0.67 | NM_021204 | MASA          | -0.67 |
| NM_004946 | DOCK2             | -0.67 | NM_006242 | PPP1R3D       | -0.67 |
| XM_171149 | MGC26484          | -0.67 | NM_000080 | CHRNE         | -0.67 |
| NM_000570 | FCGR3B            | -0.67 | NM_004757 | SCYE1         | -0.67 |
| NM_005719 | ARPC3             | -0.67 | XM_371332 | KIF21B        | -0.67 |
| NM_005345 | HSPA1A            | -0.67 | NM_014177 | HSPC154       | -0.67 |
| NM_006115 | PRAME             | -0.67 | NM_003564 | TAGLN2        | -0.67 |
| NM_005258 | GCHFR             | -0.67 | NM_001937 | DPT           | -0.67 |
| NM_001010 | RPS6              | -0.67 | NM_003724 | JRK           | -0.67 |
| NM_003966 | SEMA5A            | -0.67 | NM_005467 | NAALAD2       | -0.67 |
| NM_005710 | PQBP1             | -0.67 | NM_012099 | ASE-1         | -0.67 |
| NM_015271 | TRIM2             | -0.67 | NM_015432 | PLEKHG4       | -0.67 |
| XM_048235 | HYPM              | -0.67 | NM_017688 | BSPRY         | -0.67 |
| NM_018711 | DKFZP761H039      | -0.67 | NM_017964 | SLC30A6       | -0.67 |
| NM_019852 | METTL3            | -0.67 | NM_020714 | ZNF490        | -0.67 |
| NM_022748 | TENS1             | -0.67 | NM_024052 | C17ORF39      | -0.67 |
| NM_024810 | FLJ23018          | -0.67 | NM_025260 | C6ORF25       | -0.67 |
| NM_030805 | LMAN2L            | -0.67 | NM_031298 | MGC2963       | -0.67 |
| NM_032415 | CARD11            | -0.67 | NM_018287 | ARHGAP12      | -0.67 |
| NM_033129 | SCRT2             | -0.67 | XM_071793 | C14ORF28      | -0.67 |
| XM_060020 | LOC139231         | -0.67 | NM_152473 | FLJ32214      | -0.67 |
| NM_152528 | FLJ36175          | -0.67 | NM_014069 | PSORS1C2      | -0.67 |
| NM_145653 | TCEB3C            | -0.67 | NM_207381 | FLJ41287      | -0.67 |
| NM_020690 | MASK-BP3          | -0.67 | NM_207464 | FLJ40008      | -0.67 |
| XM_032059 | LOC90485          | -0.67 | XM_171489 | LOC256144     | -0.67 |
| XM_377958 | LOC402289         | -0.67 | XM_379541 | LOC401441     | -0.67 |
| XM_373472 | LOC387709         | -0.67 | XM_378236 | LOC399786     | -0.67 |

|           |           |       |              |               |       |
|-----------|-----------|-------|--------------|---------------|-------|
| XM_372565 | LOC390569 | -0.67 | XM_375150    | LOC400301     | -0.67 |
| XM_371413 | LOC388822 | -0.67 | NM_001005327 | OR6K3         | -0.67 |
| NM_212551 | SB145     | -0.67 | NM_002982    | CCL2          | -0.66 |
| NM_001786 | CDC2      | -0.66 | XM_291304    | C9ORF96       | -0.66 |
| NM_002611 | PDK2      | -0.66 | NM_000289    | PFKM          | -0.66 |
| NM_014006 | SMG1      | -0.66 | NM_002723    | PRB4          | -0.66 |
| NM_000960 | PTGIR     | -0.66 | NM_016943    | TAS2R3        | -0.66 |
| NM_001794 | CDH4      | -0.66 | NM_004052    | BNIP3         | -0.66 |
| NM_022759 | FLJ21865  | -0.66 | NM_017775    | FLJ20343      | -0.66 |
| NM_006505 | PVR       | -0.66 | NM_033389    | SSH2          | -0.66 |
| NM_002009 | FGF7      | -0.66 | NM_033655    | CNTNAP3       | -0.66 |
| NM_000258 | MYL3      | -0.66 | NM_004386    | CSPG3         | -0.66 |
| NM_004137 | KCNMB1    | -0.66 | NM_002349    | LY75          | -0.66 |
| NM_021048 | MAGEA10   | -0.66 | NM_002862    | PYGB          | -0.66 |
| XM_033113 | KIAA0789  | -0.66 | NM_014787    | DNAJC6        | -0.66 |
| XM_033371 | C14ORF120 | -0.66 | XM_376189    | DKFZP586K1520 | -0.66 |
| NM_016032 | ZDHHC9    | -0.66 | NM_018116    | FLJ10504      | -0.66 |
| NM_018137 | HRMT1L6   | -0.66 | NM_018912    | PCDHGA1       | -0.66 |
| NM_022493 | NARFL     | -0.66 | NM_024795    | FLJ22800      | -0.66 |
| NM_030924 | BGR       | -0.66 | XM_373381    | H2AFB         | -0.66 |
| NM_032135 | C14ORF155 | -0.66 | NM_032809    | C9ORF54       | -0.66 |
| NM_032498 | PEPP-2    | -0.66 | NM_033124    | NYD-SP28      | -0.66 |
| NM_138361 | LRSAM1    | -0.66 | NM_052882    | ZIM3          | -0.66 |
| NM_052871 | MGC4677   | -0.66 | NM_053055    | CTMP          | -0.66 |
| NM_173482 | FLJ40365  | -0.66 | NM_144652    | FLJ25409      | -0.66 |
| NM_152423 | FLJ33516  | -0.66 | NM_173495    | FLJ30296      | -0.66 |
| NM_152549 | MGC39633  | -0.66 | NM_182530    | FLJ25056      | -0.66 |
| XM_166443 | TDRD6     | -0.66 | NM_145010    | C10ORF63      | -0.66 |
| NM_145702 | TIGD1     | -0.66 | NM_145023    | CCDC7         | -0.66 |
| NM_144999 | MGC20806  | -0.66 | NM_203373    | FBXL22        | -0.66 |
| NM_198498 | MGC50104  | -0.66 | NM_207367    | FLJ42291      | -0.66 |
| NM_207414 | FLJ43860  | -0.66 | NM_207478    | FLJ44385      | -0.66 |
| XM_085967 | LOC147942 | -0.66 | XM_092019    | LOC163131     | -0.66 |
| XM_210613 | LOC285563 | -0.66 | XM_294209    | LOC340260     | -0.66 |
| XM_378776 | LOC400675 | -0.66 | XM_380013    | LOC402671     | -0.66 |
| XM_380020 | LOC402676 | -0.66 | NM_004967    | IBSP          | -0.65 |
| NM_005936 | MLLT4     | -0.65 | NM_004426    | PHC1          | -0.65 |
| NM_015944 | CGI-14    | -0.65 | NM_014294    | TRAM1         | -0.65 |
| NM_003594 | TTF2      | -0.65 | NM_001139    | ALOX12B       | -0.65 |
| NM_021235 | EPS15L1   | -0.65 | NM_004198    | CHRNA6        | -0.65 |
| NM_000433 | NCF2      | -0.65 | NM_001446    | FABP7         | -0.65 |
| NM_020452 | ATP8B2    | -0.65 | NM_004929    | CALB1         | -0.65 |
| NM_013279 | C11ORF9   | -0.65 | NM_001961    | EEF2          | -0.65 |
| NM_006277 | ITSN2     | -0.65 | NM_001095    | ACCN2         | -0.65 |
| XM_047025 | OATL1     | -0.65 | NM_004776    | B4GALT5       | -0.65 |
| NM_014725 | STARD8    | -0.65 | NM_005776    | CNIH          | -0.65 |

|           |            |       |              |            |       |
|-----------|------------|-------|--------------|------------|-------|
| NM_012289 | KEAP1      | -0.65 | NM_007243    | NRM        | -0.65 |
| NM_015157 | PHLDB1     | -0.65 | NM_012198    | GCA        | -0.65 |
| NM_012135 | D6S2654E   | -0.65 | NM_015950    | MRPL2      | -0.65 |
| NM_016114 | ASB1       | -0.65 | NM_016209    | LOC51693   | -0.65 |
| NM_017626 | DNAJB12    | -0.65 | NM_017863    | FLJ20527   | -0.65 |
| NM_021156 | DJ971N18.2 | -0.65 | NM_018688    | BIN3       | -0.65 |
| XM_027330 | RBM25      | -0.65 | XM_051699    | KIAA1344   | -0.65 |
| NM_024699 | FLJ14007   | -0.65 | NM_032932    | RAB11-FIP4 | -0.65 |
| NM_033426 | KIAA1737   | -0.65 | NM_213599    | TMEM16E    | -0.65 |
| NM_173596 | SLC39A5    | -0.65 | XM_371311    | FLJ36032   | -0.65 |
| XM_378855 | LOC339442  | -0.65 | XM_211339    | LOC284120  | -0.65 |
| XM_097278 | LOC147710  | -0.65 | XM_374945    | LOC399968  | -0.65 |
| XM_372584 | LOC390616  | -0.65 | NM_001001794 | MGC33692   | -0.65 |
| XM_039796 | TNIK       | -0.64 | NM_014566    | OR1D5      | -0.64 |
| NM_032971 | PCDH11Y    | -0.64 | NM_006169    | NNMT       | -0.64 |
| NM_006225 | PLCD1      | -0.64 | NM_000213    | ITGB4      | -0.64 |
| NM_016523 | KLRF1      | -0.64 | NM_000575    | IL1A       | -0.64 |
| NM_003822 | NR5A2      | -0.64 | NM_012281    | KCND2      | -0.64 |
| NM_030766 | BCL2L14    | -0.64 | NM_001586    | CXORF2     | -0.64 |
| NM_000848 | GSTM2      | -0.64 | NM_002112    | HDC        | -0.64 |
| NM_004538 | NAP1L3     | -0.64 | NM_003059    | SLC22A4    | -0.64 |
| NM_023068 | SN         | -0.64 | NM_021796    | PLAC1      | -0.64 |
| XM_375181 | KIAA1018   | -0.64 | NM_015966    | SDBCAG84   | -0.64 |
| NM_017746 | TEX10      | -0.64 | NM_018913    | PCDHGA10   | -0.64 |
| NM_020808 | SIPA1L2    | -0.64 | NM_022469    | FLJ21195   | -0.64 |
| NM_025180 | FLJ13386   | -0.64 | XM_370692    | LOC121006  | -0.64 |
| NM_182507 | LOC144501  | -0.64 | NM_173496    | MPP7       | -0.64 |
| NM_178827 | FLJ35834   | -0.64 | NM_198274    | SMYD1      | -0.64 |
| NM_130899 | MGC26988   | -0.64 | NM_152640    | DCP1B      | -0.64 |
| NM_178862 | SIMP       | -0.64 | NM_173811    | FLJ32675   | -0.64 |
| XM_371187 | MGC45922   | -0.64 | XM_379054    | LOC339674  | -0.64 |
| XM_371215 | LOC388585  | -0.64 | XM_114355    | LOC201651  | -0.64 |
| XM_295034 | LOC339693  | -0.64 | XM_371820    | LOC389389  | -0.64 |
| NM_024110 | CARD14     | -0.63 | NM_002984    | CCL4       | -0.63 |
| NM_002625 | PFKFB1     | -0.63 | NM_005302    | GPR37      | -0.63 |
| NM_003552 | OR1D4      | -0.63 | NM_001557    | IL8RB      | -0.63 |
| NM_000242 | MBL2       | -0.63 | NM_004349    | CBFA2T1    | -0.63 |
| NM_005315 | GSCL       | -0.63 | NM_002505    | NFYA       | -0.63 |
| NM_021923 | FGFRL1     | -0.63 | NM_002451    | MTAP       | -0.63 |
| NM_000348 | SRD5A2     | -0.63 | NM_181745    | GPR120     | -0.63 |
| NM_003604 | IRS4       | -0.63 | NM_000618    | IGF1       | -0.63 |
| NM_000068 | CACNA1A    | -0.63 | NM_005925    | MEP1B      | -0.63 |
| NM_025136 | OPA3       | -0.63 | NM_000023    | SGCA       | -0.63 |
| NM_004338 | C18ORF1    | -0.63 | NM_001307    | CLDN7      | -0.63 |
| NM_020056 | HLA-DQA2   | -0.63 | NM_002456    | MUC1       | -0.63 |
| NM_145035 | ADMP       | -0.63 | NM_013249    | ZNF214     | -0.63 |



|           |               |       |           |           |       |
|-----------|---------------|-------|-----------|-----------|-------|
| NM_003531 | HIST1H3C      | -0.63 | NM_006300 | ZNF230    | -0.63 |
| NM_003951 | SLC25A14      | -0.63 | NM_004790 | SLC22A6   | -0.63 |
| NM_005772 | RCL1          | -0.63 | NM_015203 | KIAA0460  | -0.63 |
| NM_015511 | C20ORF4       | -0.63 | NM_148571 | MRPL27    | -0.63 |
| NM_016122 | NY-REN-58     | -0.63 | NM_016065 | MRPS16    | -0.63 |
| NM_018973 | DPM3          | -0.63 | NM_018434 | RNF130    | -0.63 |
| NM_018530 | GSDML         | -0.63 | NM_018917 | PCDHGA4   | -0.63 |
| XM_291085 | CDGAP         | -0.63 | NM_022354 | SPATA1    | -0.63 |
| NM_022369 | FLJ12541      | -0.63 | NM_022749 | RAI16     | -0.63 |
| NM_022750 | ZC3HDC1       | -0.63 | NM_022751 | C18ORF11  | -0.63 |
| NM_022115 | PRDM15        | -0.63 | NM_024535 | CORO7     | -0.63 |
| NM_032413 | NMES1         | -0.63 | XM_055095 | KIAA1906  | -0.63 |
| NM_178812 | LYRIC         | -0.63 | NM_139072 | DNER      | -0.63 |
| NM_080742 | B3GAT2        | -0.63 | NM_130768 | C7ORF7    | -0.63 |
| NM_152445 | C14ORF44      | -0.63 | NM_178470 | WDR40B    | -0.63 |
| NM_133498 | SPACA4        | -0.63 | XM_114685 | C9ORF21   | -0.63 |
| NM_153289 | DEFB119       | -0.63 | NM_198279 | CXORF23   | -0.63 |
| NM_145865 | FLJ38819      | -0.63 | NM_198474 | UNQ564    | -0.63 |
| NM_147156 | TMEM23        | -0.63 | NM_152775 | MGC33607  | -0.63 |
| XM_292160 | MGC75495      | -0.63 | NM_181539 | KRT25B    | -0.63 |
| XM_372145 | LOC389792     | -0.63 | XM_060580 | LOC127623 | -0.63 |
| XM_007651 | LOC116166     | -0.63 | XM_292512 | LOC342371 | -0.63 |
| XM_372996 | LOC391555     | -0.63 | XM_371350 | LOC388753 | -0.63 |
| XM_374682 | LOC393045     | -0.63 | XM_378746 | LOC400649 | -0.63 |
| NM_005372 | MOS           | -0.62 | NM_000443 | ABCB4     | -0.62 |
| NM_001164 | APBB1         | -0.62 | NM_006734 | HIVEP2    | -0.62 |
| NM_016580 | PCDH12        | -0.62 | NM_016162 | ING4      | -0.62 |
| NM_002485 | NBS1          | -0.62 | NM_000346 | SOX9      | -0.62 |
| NM_005100 | AKAP12        | -0.62 | NM_005099 | ADAMTS4   | -0.62 |
| NM_001229 | CASP9         | -0.62 | NM_012210 | TRIM32    | -0.62 |
| NM_153837 | GPR114        | -0.62 | NM_058238 | WNT7B     | -0.62 |
| NM_001037 | SCN1B         | -0.62 | NM_003568 | ANXA9     | -0.62 |
| NM_001085 | SERPINA3      | -0.62 | NM_002433 | MOG       | -0.62 |
| NM_006949 | STXBP2        | -0.62 | NM_007354 | GR6       | -0.62 |
| NM_016096 | LOC51123      | -0.62 | NM_016591 | C2GNT3    | -0.62 |
| NM_016355 | DDX47         | -0.62 | NM_017717 | MUCDHL    | -0.62 |
| NM_018992 | KCTD5         | -0.62 | NM_018439 | IMPACT    | -0.62 |
| NM_020442 | VARS2L        | -0.62 | NM_023077 | FLJ12439  | -0.62 |
| XM_291223 | MYO1G         | -0.62 | NM_024784 | ZBTB3     | -0.62 |
| XM_375569 | DKFZP43411610 | -0.62 | NM_145231 | C14ORF143 | -0.62 |
| NM_033513 | C19ORF20      | -0.62 | NM_152274 | MGC29729  | -0.62 |
| XM_371259 | DKFZP5471048  | -0.62 | XM_379205 | LOC151658 | -0.62 |
| NM_194290 | LOC153684     | -0.62 | NM_152609 | FLJ32001  | -0.62 |
| NM_182538 | MGC29671      | -0.62 | XM_173173 | AOF1      | -0.62 |
| NM_152753 | SCUBE3        | -0.62 | NM_145179 | C21ORF93  | -0.62 |
| XM_376419 | LOC285638     | -0.62 | XM_291144 | LOC340089 | -0.62 |

|           |              |       |              |               |       |
|-----------|--------------|-------|--------------|---------------|-------|
| XM_376101 | LOC400987    | -0.62 | XM_377877    | LOC402200     | -0.62 |
| XM_380108 | LOC402506    | -0.62 | XM_374835    | LOC399814     | -0.62 |
| XM_373571 | LOC387940    | -0.62 | NM_005211    | CSF1R         | -0.61 |
| NM_002736 | PRKAR2B      | -0.61 | NM_006212    | PFKFB2        | -0.61 |
| NM_003242 | TGFBR2       | -0.61 | NM_003331    | TYK2          | -0.61 |
| NM_019888 | MC3R         | -0.61 | NM_000539    | RHO           | -0.61 |
| NM_004705 | PRKRIR       | -0.61 | NM_001965    | EGR4          | -0.61 |
| NM_006792 | MORF4        | -0.61 | NM_003410    | ZFX           | -0.61 |
| NM_021966 | TCL1A        | -0.61 | XM_042698    | USP22         | -0.61 |
| NM_002564 | P2RY2        | -0.61 | NM_006579    | EBP           | -0.61 |
| NM_000944 | PPP3CA       | -0.61 | NM_000590    | IL9           | -0.61 |
| NM_001035 | RYR2         | -0.61 | NM_002381    | MATN3         | -0.61 |
| NM_007285 | GABARAPL2    | -0.61 | NM_004487    | GOLGB1        | -0.61 |
| NM_020947 | KIAA1609     | -0.61 | NM_005357    | LIPE          | -0.61 |
| NM_000239 | LYZ          | -0.61 | NM_001828    | CLC           | -0.61 |
| NM_001622 | AHSG         | -0.61 | NM_001001    | RPL36AL       | -0.61 |
| NM_007077 | AP4S1        | -0.61 | NM_006647    | NOXA1         | -0.61 |
| NM_006651 | CPLX1        | -0.61 | NM_015571    | SENP6         | -0.61 |
| NM_015470 | GAF1         | -0.61 | NM_012329    | MMD           | -0.61 |
| NM_014344 | FJX1         | -0.61 | NM_032217    | ANKRD17       | -0.61 |
| XM_212241 | DKFZP434M131 | -0.61 | NM_016583    | PLUNC         | -0.61 |
| NM_018838 | DAP13        | -0.61 | NM_024692    | FLJ21069      | -0.61 |
| NM_030938 | VMP1         | -0.61 | NM_032280    | ZCCHC9        | -0.61 |
| NM_032322 | RNF135       | -0.61 | XM_371484    | KIAA1724      | -0.61 |
| NM_152282 | FLJ23751     | -0.61 | NM_177531    | PKHD1L1       | -0.61 |
| NM_139015 | SPPL3        | -0.61 | NM_080604    | TJP4          | -0.61 |
| NM_130469 | JDP2         | -0.61 | NM_152359    | CPT1C         | -0.61 |
| XM_378251 | LOC143188    | -0.61 | XM_379133    | LOC151121     | -0.61 |
| NM_152501 | IFIX         | -0.61 | NM_130769    | GPHA2         | -0.61 |
| NM_153226 | TMEM20       | -0.61 | NM_152614    | MGC35154      | -0.61 |
| NM_152725 | SLC39A12     | -0.61 | NM_173643    | DKFZP547G0215 | -0.61 |
| NM_173661 | FLJ35424     | -0.61 | NM_207355    | POTE15        | -0.61 |
| NM_207387 | FLJ35696     | -0.61 | NM_207423    | FLJ45983      | -0.61 |
| XM_374037 | LOC389105    | -0.61 | XM_371678    | LOC389174     | -0.61 |
| XM_373489 | LOC387746    | -0.61 | XM_373650    | LOC388180     | -0.61 |
| XM_370893 | LOC388159    | -0.61 | NM_001001917 | OR56A1        | -0.61 |
| XM_378155 | LOC402434    | -0.61 | NM_152572    | C9ORF98       | -0.6  |
| NM_004431 | EPHA2        | -0.6  | NM_004440    | EPHA7         | -0.6  |
| NM_004742 | BAIAP1       | -0.6  | NM_005392    | PHF2          | -0.6  |
| NM_004785 | SLC9A3R2     | -0.6  | NM_004097    | EMX1          | -0.6  |
| NM_012183 | FOXD3        | -0.6  | NM_006164    | NFE2L2        | -0.6  |
| NM_002919 | RFX3         | -0.6  | NM_006713    | PC4           | -0.6  |
| NM_006706 | TCERG1       | -0.6  | NM_000030    | AGXT          | -0.6  |
| NM_001673 | ASNS         | -0.6  | NM_016230    | NCB5OR        | -0.6  |
| XM_376059 | SERTAD2      | -0.6  | NM_022110    | FKBPL         | -0.6  |
| NM_000100 | CSTB         | -0.6  | NM_002712    | PPP1R7        | -0.6  |

|           |           |       |              |           |       |
|-----------|-----------|-------|--------------|-----------|-------|
| NM_002067 | GNA11     | -0.6  | NM_003363    | USP4      | -0.6  |
| NM_002507 | NGFR      | -0.6  | NM_004725    | BUB3      | -0.6  |
| NM_006870 | DSTN      | -0.6  | NM_002823    | PTMA      | -0.6  |
| NM_005203 | COL13A1   | -0.6  | NM_004481    | GALNT2    | -0.6  |
| NM_014458 | AB026190  | -0.6  | NM_024866    | ADM2      | -0.6  |
| NM_003116 | SPAG4     | -0.6  | NM_005114    | HS3ST1    | -0.6  |
| NM_015039 | NMNAT2    | -0.6  | NM_007360    | KLRK1     | -0.6  |
| NM_020765 | RBAF600   | -0.6  | NM_015642    | ZNF288    | -0.6  |
| NM_015644 | TLL3      | -0.6  | NM_020637    | FGF22     | -0.6  |
| XM_089081 | DNB5      | -0.6  | NM_016930    | STX18     | -0.6  |
| NM_017512 | HSRTSBETA | -0.6  | XM_046531    | KIAA1614  | -0.6  |
| NM_021627 | SENP2     | -0.6  | NM_024029    | MGC3262   | -0.6  |
| NM_024746 | FLJ13840  | -0.6  | NM_024112    | C9ORF16   | -0.6  |
| NM_024940 | DOCK5     | -0.6  | XM_030378    | ZNF527    | -0.6  |
| NM_080737 | SYTL4     | -0.6  | NM_198147    | LOC116236 | -0.6  |
| NM_133370 | YT521     | -0.6  | NM_178867    | SFXN4     | -0.6  |
| NM_144616 | FLJ32416  | -0.6  | NM_152449    | FLJ33008  | -0.6  |
| NM_178232 | HAPLN3    | -0.6  | NM_144705    | MGC27019  | -0.6  |
| NM_153232 | CRI2      | -0.6  | NM_144982    | MGC23401  | -0.6  |
| XM_113743 | TMEM16F   | -0.6  | XM_371588    | LOC389069 | -0.6  |
| XM_379637 | LOC401513 | -0.6  | XM_380155    | LOC402626 | -0.6  |
| XM_374269 | LOC389657 | -0.6  | XM_378043    | LOC402353 | -0.6  |
| XM_370776 | LOC388015 | -0.6  | XM_372343    | LOC390031 | -0.6  |
| XM_370868 | LOC388125 | -0.6  | NM_001004343 | LOC440738 | -0.6  |
| XM_374379 | LOC392583 | -0.6  | NM_001005324 | OR10V1    | -0.6  |
| NM_213607 | LOC388389 | -0.6  | NM_001296    | CCBP2     | -0.59 |
| NM_000740 | CHRM3     | -0.59 | XM_291437    | OR1C1     | -0.59 |
| NM_000233 | LHCGR     | -0.59 | NM_001809    | CENPA     | -0.59 |
| NM_004726 | REPS2     | -0.59 | NM_004143    | CITED1    | -0.59 |
| NM_013258 | ASC       | -0.59 | NM_006162    | NFATC1    | -0.59 |
| NM_005413 | SIX3      | -0.59 | NM_015143    | METAP1    | -0.59 |
| NM_001126 | ADSS      | -0.59 | NM_013378    | VPREB3    | -0.59 |
| NM_002083 | GPX2      | -0.59 | NM_021201    | MS4A7     | -0.59 |
| NM_030640 | DUSP16    | -0.59 | NM_000639    | TNFSF6    | -0.59 |
| NM_032414 | PROK1     | -0.59 | NM_000737    | CGB       | -0.59 |
| NM_005446 | P2RXL1    | -0.59 | NM_013401    | RAB3IL1   | -0.59 |
| NM_001115 | ADCY8     | -0.59 | NM_002375    | MAP4      | -0.59 |
| NM_019624 | ABCB9     | -0.59 | NM_003090    | SNRPA1    | -0.59 |
| NM_013309 | SLC30A4   | -0.59 | NM_004212    | SLC28A2   | -0.59 |
| NM_015275 | KIAA1033  | -0.59 | NM_014175    | MRPL15    | -0.59 |
| NM_016097 | HSPC039   | -0.59 | NM_016606    | C5ORF19   | -0.59 |
| NM_016357 | EPLIN     | -0.59 | NM_022050    | SCAND2    | -0.59 |
| XM_377955 | ANKIB1    | -0.59 | NM_020433    | JPH2      | -0.59 |
| NM_021254 | C21ORF59  | -0.59 | NM_024059    | MGC5356   | -0.59 |
| NM_080864 | RLN3      | -0.59 | NM_032646    | TTYH2     | -0.59 |
| NM_198988 | LENG9     | -0.59 | NM_181776    | SLC36A2   | -0.59 |

|              |               |       |           |               |       |
|--------------|---------------|-------|-----------|---------------|-------|
| NM_145306    | C10ORF35      | -0.59 | NM_201566 | SLC16A13      | -0.59 |
| NM_173673    | FLJ34503      | -0.59 | NM_198540 | B3GALT7       | -0.59 |
| NM_207405    | FLJ46481      | -0.59 | NM_207510 | FLJ45224      | -0.59 |
| XM_170597    | LOC256374     | -0.59 | XM_375174 | LOC400340     | -0.59 |
| XM_378321    | LOC399972     | -0.59 | XM_373686 | LOC388277     | -0.59 |
| NM_004877    | GMFG          | -0.58 | NM_000221 | KHK           | -0.58 |
| NM_005864    | EFS           | -0.58 | NM_014325 | CORO1C        | -0.58 |
| NM_006227    | PLTP          | -0.58 | NM_006991 | ZNF197        | -0.58 |
| NM_005541    | INPP5D        | -0.58 | NM_000341 | SLC3A1        | -0.58 |
| NM_022648    | TNS           | -0.58 | NM_004841 | RASAL2        | -0.58 |
| NM_002975    | SCGF          | -0.58 | NM_004464 | FGF5          | -0.58 |
| NM_019010    | KRT20         | -0.58 | NM_000126 | ETFA          | -0.58 |
| NM_004900    | APOBEC3B      | -0.58 | NM_018136 | ASPM          | -0.58 |
| NM_033378    | CGB2          | -0.58 | NM_005860 | FSTL3         | -0.58 |
| NM_015008    | KIAA0779      | -0.58 | NM_001172 | ARG2          | -0.58 |
| NM_004501    | HNRPU         | -0.58 | NM_002319 | LRCH4         | -0.58 |
| NM_003486    | SLC7A5        | -0.58 | NM_016831 | PER3          | -0.58 |
| NM_003794    | SNX4          | -0.58 | XM_376203 | TATDN2        | -0.58 |
| XM_043493    | SV2C          | -0.58 | NM_015605 | DKFZP566K0524 | -0.58 |
| NM_014419    | DKKL1-PENDING | -0.58 | NM_015687 | FILIP1        | -0.58 |
| NM_016521    | LOC51270      | -0.58 | NM_021616 | TRIM34        | -0.58 |
| NM_016056    | CGI-119       | -0.58 | NM_019096 | GTPBP2        | -0.58 |
| NM_017888    | FLJ20581      | -0.58 | NM_018252 | FLJ10874      | -0.58 |
| NM_020192    | C7ORF36       | -0.58 | NM_020755 | TDE2          | -0.58 |
| NM_022903    | FLJ12800      | -0.58 | NM_024089 | KDEL1C        | -0.58 |
| NM_024094    | MGC5528       | -0.58 | NM_030569 | ITIH5         | -0.58 |
| NM_032793    | FLJ14490      | -0.58 | NM_032319 | C2ORF7        | -0.58 |
| NM_032631    | HDGF2         | -0.58 | NM_138395 | METRS         | -0.58 |
| NM_053017    | ART5          | -0.58 | NM_021059 | HIST2H3C      | -0.58 |
| NM_152428    | FRMPD2        | -0.58 | NM_175607 | CNTN4         | -0.58 |
| NM_178356    | LCE4A         | -0.58 | NM_144992 | MGC26733      | -0.58 |
| NM_207351    | FLJ33674      | -0.58 | NM_178433 | LCE3B         | -0.58 |
| NM_198532    | FLJ45778      | -0.58 | XM_293157 | LOC343705     | -0.58 |
| XM_372763    | LOC391003     | -0.58 | XM_379096 | LOC400955     | -0.58 |
| XM_379391    | LOC401230     | -0.58 | XM_372108 | LOC389748     | -0.58 |
| XM_373556    | LOC387898     | -0.58 | XM_375663 | LOC400720     | -0.58 |
| NM_001002255 | SUMO4         | -0.58 | NM_001736 | C5R1          | -0.57 |
| NM_145015    | MRGPRF        | -0.57 | NM_013345 | GPR132        | -0.57 |
| NM_001326    | CSTF3         | -0.57 | NM_015460 | MYRIP         | -0.57 |
| NM_005967    | NAB2          | -0.57 | NM_145285 | NKX2-3        | -0.57 |
| NM_001869    | CPA2          | -0.57 | NM_020661 | AICDA         | -0.57 |
| NM_004117    | FKBP5         | -0.57 | NM_012116 | CBLC          | -0.57 |
| NM_000260    | MYO7A         | -0.57 | NM_001492 | GDF1          | -0.57 |
| NM_002989    | CCL21         | -0.57 | NM_013437 | LRP12         | -0.57 |
| NM_005910    | MAPT          | -0.57 | NM_080657 | CIG5          | -0.57 |
| NM_003833    | MATN4         | -0.57 | NM_006799 | PRSS21        | -0.57 |

|              |               |       |           |           |       |
|--------------|---------------|-------|-----------|-----------|-------|
| NM_012447    | STAG3         | -0.57 | NM_015714 | G0S2      | -0.57 |
| NM_021035    | KIAA1404      | -0.57 | NM_021045 | ZNF248    | -0.57 |
| NM_020961    | KIAA1627      | -0.57 | NM_020857 | VPS18     | -0.57 |
| NM_025140    | FLJ22471      | -0.57 | NM_033199 | UCN2      | -0.57 |
| NM_183058    | LYZL2         | -0.57 | NM_152405 | JMY       | -0.57 |
| NM_173485    | C20ORF17      | -0.57 | XM_085367 | FLJ40162  | -0.57 |
| NM_173826    | DKFZP313N0621 | -0.57 | XM_211108 | LOC283584 | -0.57 |
| XM_292122    | LOC338829     | -0.57 | XM_379175 | LOC401052 | -0.57 |
| XM_373042    | LOC391722     | -0.57 | XM_372345 | LOC390033 | -0.57 |
| XM_378617    | LOC400548     | -0.57 | XM_372586 | LOC390625 | -0.57 |
| NM_002651    | PIK4CB        | -0.56 | NM_000388 | CASR      | -0.56 |
| NM_020149    | MEIS2         | -0.56 | NM_005326 | HAGH      | -0.56 |
| NM_000190    | HMBS          | -0.56 | NM_005622 | SAH       | -0.56 |
| NM_020383    | XPNPEP1       | -0.56 | NM_003895 | SYNJ1     | -0.56 |
| NM_005339    | HIP2          | -0.56 | NM_022039 | SHFM3     | -0.56 |
| NM_020731    | AHRR          | -0.56 | NM_004984 | KIF5A     | -0.56 |
| NM_005704    | PTPRU         | -0.56 | NM_000743 | CHRNA3    | -0.56 |
| NM_000042    | APOH          | -0.56 | NM_015711 | GLTSCR1   | -0.56 |
| XM_376776    | TOX           | -0.56 | NM_006596 | POLQ      | -0.56 |
| NM_006369    | MUF1          | -0.56 | XM_051081 | TBC1D12   | -0.56 |
| NM_015448    | DPCD          | -0.56 | NM_016491 | MRPL37    | -0.56 |
| NM_013382    | POMT2         | -0.56 | NM_016619 | PLAC8     | -0.56 |
| NM_017645    | FAM29A        | -0.56 | NM_018152 | C20ORF12  | -0.56 |
| NM_017671    | C20ORF42      | -0.56 | NM_018257 | C20ORF36  | -0.56 |
| NM_018715    | TD-60         | -0.56 | NM_019894 | TMPRSS4   | -0.56 |
| NM_020653    | ZNF287        | -0.56 | NM_020813 | ZNF471    | -0.56 |
| NM_033052    | DMRTC2        | -0.56 | NM_024099 | MGC2477   | -0.56 |
| NM_031307    | FKSG32        | -0.56 | NM_030962 | CMT4B2    | -0.56 |
| NM_032920    | C21ORF124     | -0.56 | NM_138569 | C6ORF142  | -0.56 |
| NM_144586    | MGC29643      | -0.56 | NM_139162 | SMCR7     | -0.56 |
| NM_080674    | C20ORF86      | -0.56 | XM_379636 | C9ORF122  | -0.56 |
| NM_152778    | MGC33302      | -0.56 | XM_375099 | LOC283585 | -0.56 |
| NM_173628    | FLJ40457      | -0.56 | NM_181647 | LOC285398 | -0.56 |
| XM_377701    | LOC284861     | -0.56 | NM_198478 | NKPD1     | -0.56 |
| XM_371085    | LOC339229     | -0.56 | NM_182596 | FLJ25037  | -0.56 |
| NM_001001479 | SLC35E4       | -0.56 | NM_181684 | KRTAP12-2 | -0.56 |
| XM_066069    | LOC128629     | -0.56 | XM_295126 | LOC339997 | -0.56 |
| XM_208373    | LOC285984     | -0.56 | XM_372760 | LOC390999 | -0.56 |
| XM_374057    | LOC389161     | -0.56 | XM_379552 | LOC401449 | -0.56 |
| XM_379634    | LOC401504     | -0.56 | XM_380099 | LOC402476 | -0.56 |
| XM_378052    | LOC402357     | -0.56 | XM_371081 | LOC388424 | -0.56 |
| XM_372214    | LOC389857     | -0.56 | NM_006067 | NOC4      | -0.56 |
| NM_152700    | MGC26597      | -0.55 | NM_002030 | FPRL2     | -0.55 |
| NM_000733    | CD3E          | -0.55 | NM_003906 | MCM3AP    | -0.55 |
| NM_002628    | PFN2          | -0.55 | NM_016089 | ZNF589    | -0.55 |
| NM_015994    | ATP6V1D       | -0.55 | NM_013366 | ANAPC2    | -0.55 |

|           |               |       |           |           |       |
|-----------|---------------|-------|-----------|-----------|-------|
| NM_021223 | MYL7          | -0.55 | NM_018223 | CHFR      | -0.55 |
| NM_003591 | CUL2          | -0.55 | NM_004244 | CD163     | -0.55 |
| NM_002207 | ITGA9         | -0.55 | NM_003808 | TNFSF13   | -0.55 |
| NM_002276 | KRT19         | -0.55 | NM_015719 | COL5A3    | -0.55 |
| NM_005639 | SYT1          | -0.55 | NM_001638 | APOF      | -0.55 |
| NM_001805 | CEBPE         | -0.55 | NM_005141 | FGB       | -0.55 |
| NM_016946 | F11R          | -0.55 | NM_000766 | CYP2A13   | -0.55 |
| NM_004955 | SLC29A1       | -0.55 | NM_006501 | MOBP      | -0.55 |
| NM_152707 | SLC25A16      | -0.55 | NM_014738 | KIAA0195  | -0.55 |
| XM_041363 | PDZRN3        | -0.55 | XM_114303 | GRSP1     | -0.55 |
| NM_016466 | MGC41816      | -0.55 | NM_016630 | SPG21     | -0.55 |
| NM_019066 | MAGEL2        | -0.55 | NM_018990 | CXORF9    | -0.55 |
| NM_020319 | ANKMY2        | -0.55 | NM_033520 | C19ORF33  | -0.55 |
| NM_024612 | DHX40         | -0.55 | NM_138778 | C9ORF112  | -0.55 |
| NM_144594 | FLJ32942      | -0.55 | NM_138798 | LOC129531 | -0.55 |
| NM_139170 | LOC146562     | -0.55 | NM_173566 | MGC50372  | -0.55 |
| NM_175906 | MGC33608      | -0.55 | XM_291419 | GPR153    | -0.55 |
| NM_177987 | TUBB8-PENDING | -0.55 | NM_199244 | FOXD4B    | -0.55 |
| XM_113912 | LOC201140     | -0.55 | XM_373866 | LOC388692 | -0.55 |
| XM_379068 | LOC400937     | -0.55 | XM_374052 | LOC389150 | -0.55 |
| XM_371818 | LOC389386     | -0.55 | XM_374142 | LOC389333 | -0.55 |
| XM_379657 | LOC401544     | -0.55 | XM_370577 | LOC387712 | -0.55 |
| XM_378331 | LOC399986     | -0.55 | XM_373630 | LOC388126 | -0.55 |
| XM_370691 | LOC387856     | -0.55 | XM_377076 | LOC401625 | -0.55 |
| NM_013410 | AK3           | -0.54 | NM_014216 | ITPK1     | -0.54 |
| NM_031417 | MARK4         | -0.54 | NM_002591 | PCK1      | -0.54 |
| NM_021643 | TRIB2         | -0.54 | NM_000633 | BCL2      | -0.54 |
| NM_005618 | DLL1          | -0.54 | NM_139058 | ARX       | -0.54 |
| NM_005390 | PDHA2         | -0.54 | NM_003129 | SQLE      | -0.54 |
| NM_000478 | ALPL          | -0.54 | NM_018486 | HDAC8     | -0.54 |
| NM_001375 | DNASE2        | -0.54 | NM_006195 | PBX3      | -0.54 |
| NM_000878 | IL2RB         | -0.54 | NM_003611 | OFD1      | -0.54 |
| NM_001041 | SI            | -0.54 | NM_004541 | NDUFA1    | -0.54 |
| NM_006940 | SOX5          | -0.54 | NM_003916 | AP1S2     | -0.54 |
| NM_005686 | SOX13         | -0.54 | NM_004728 | DDX21     | -0.54 |
| NM_005726 | TSFM          | -0.54 | NM_006328 | RBM14     | -0.54 |
| NM_007213 | PRAF2         | -0.54 | NM_014010 | ASTN2     | -0.54 |
| NM_015117 | ZC3HDC3       | -0.54 | XM_047610 | KIAA1086  | -0.54 |
| NM_013403 | STRN4         | -0.54 | NM_032472 | PPIL3     | -0.54 |
| NM_018282 | PSPC1         | -0.54 | NM_018296 | FLJ11004  | -0.54 |
| NM_031271 | TEX15         | -0.54 | NM_020124 | IFNK      | -0.54 |
| NM_022747 | C14ORF136     | -0.54 | NM_024875 | SYNPO2L   | -0.54 |
| NM_030792 | PP1665        | -0.54 | NM_080593 | HIST1H2BK | -0.54 |
| NM_033188 | KRTAP4-5      | -0.54 | NM_145241 | WDR31     | -0.54 |
| NM_176813 | BCMP11        | -0.54 | NM_152589 | FLJ35821  | -0.54 |
| NM_152754 | SEMA3D        | -0.54 | XM_378525 | LOC283731 | -0.54 |

|              |           |       |              |               |       |
|--------------|-----------|-------|--------------|---------------|-------|
| NM_198993    | STAC2     | -0.54 | XM_064883    | LOC125962     | -0.54 |
| XM_114158    | LOC200226 | -0.54 | XM_371592    | LOC389073     | -0.54 |
| XM_373449    | LOC387638 | -0.54 | NM_001001679 | FLJ41423      | -0.54 |
| NM_001005493 | OR6C6     | -0.54 | NM_000680    | ADRA1A        | -0.53 |
| NM_005465    | AKT3      | -0.53 | NM_002596    | PCTK3         | -0.53 |
| NM_182493    | LOC91807  | -0.53 | NM_004885    | GPR74         | -0.53 |
| NM_000309    | PPOX      | -0.53 | NM_003475    | C11ORF13      | -0.53 |
| NM_024022    | TMPRSS3   | -0.53 | NM_000787    | DBH           | -0.53 |
| NM_005690    | DNM1L     | -0.53 | NM_003972    | BTAF1         | -0.53 |
| NM_005018    | PDCD1     | -0.53 | NM_019618    | IL1F9         | -0.53 |
| NM_030761    | WNT4      | -0.53 | NM_000407    | GP1BB         | -0.53 |
| NM_145640    | APOL3     | -0.53 | NM_003297    | NR2C1         | -0.53 |
| NM_005488    | TOM1      | -0.53 | NM_001641    | APEX1         | -0.53 |
| NM_003768    | PEA15     | -0.53 | NM_006769    | LMO4          | -0.53 |
| NM_030916    | PVRL4     | -0.53 | NM_006832    | PLEKHC1       | -0.53 |
| NM_002763    | PROX1     | -0.53 | NM_005112    | WDR1          | -0.53 |
| NM_000716    | C4BPB     | -0.53 | NM_004395    | DBN1          | -0.53 |
| NM_003092    | SNRPB2    | -0.53 | NM_007153    | ZNF208        | -0.53 |
| NM_004823    | KCNK6     | -0.53 | XM_375770    | LRIG2         | -0.53 |
| NM_014733    | ZFYVE16   | -0.53 | NM_006042    | HS3ST3A1      | -0.53 |
| NM_019044    | FLJ10996  | -0.53 | NM_019002    | ETAA16        | -0.53 |
| NM_017985    | C9ORF68   | -0.53 | NM_018363    | C10ORF59      | -0.53 |
| NM_018288    | PHF10     | -0.53 | NM_018414    | SIAT7A        | -0.53 |
| NM_020246    | SLC12A9   | -0.53 | NM_020466    | DJ122O8.2     | -0.53 |
| NM_020314    | MGC16824  | -0.53 | XM_371184    | KIAA1183      | -0.53 |
| NM_033440    | ELA2A     | -0.53 | NM_024580    | FLJ13119      | -0.53 |
| NM_024884    | C14ORF160 | -0.53 | NM_025059    | C6ORF97       | -0.53 |
| NM_025217    | ULBP2     | -0.53 | NM_031300    | MXD3          | -0.53 |
| NM_030915    | LBH       | -0.53 | NM_032813    | FLJ14624      | -0.53 |
| NM_032869    | CML66     | -0.53 | NM_145239    | LOC112476     | -0.53 |
| NM_052880    | MGC17330  | -0.53 | NM_053282    | EAT2          | -0.53 |
| NM_144608    | FLJ32384  | -0.53 | NM_152375    | FLJ38753      | -0.53 |
| XM_376535    | C6orf190  | -0.53 | NM_152906    | DKFZP761P1121 | -0.53 |
| NM_080675    | SPAG4L    | -0.53 | NM_152542    | DKFZP761G058  | -0.53 |
| NM_152594    | SPRED1    | -0.53 | NM_145657    | GSH1          | -0.53 |
| XM_293312    | LOC347376 | -0.53 | XM_096376    | LOC143034     | -0.53 |
| XM_293360    | LOC340571 | -0.53 | XM_379163    | LOC401038     | -0.53 |
| XM_377946    | LOC402280 | -0.53 | XM_376386    | LOC401190     | -0.53 |
| XM_379958    | LOC402619 | -0.53 | XM_378305    | LOC399933     | -0.53 |
| XM_374767    | LOC399716 | -0.53 | NM_001005285 | OR2AT4        | -0.53 |
| NM_001348    | DAPK3     | -0.52 | NM_004409    | DMPK          | -0.52 |
| NM_016308    | UMP-CMPK  | -0.52 | NM_018490    | GPR48         | -0.52 |
| NM_178168    | OR10A5    | -0.52 | NM_004147    | DRG1          | -0.52 |
| NM_018429    | BDP1      | -0.52 | NM_006546    | IMP-1         | -0.52 |
| NM_002128    | HMGB1     | -0.52 | NM_003017    | SFRS3         | -0.52 |
| NM_005224    | ARID3A    | -0.52 | NM_007222    | ZHX1          | -0.52 |

|              |           |       |           |              |       |
|--------------|-----------|-------|-----------|--------------|-------|
| NM_014236    | GNPAT     | -0.52 | NM_006745 | SC4MOL       | -0.52 |
| NM_001873    | CPE       | -0.52 | NM_005020 | PDE1C        | -0.52 |
| NM_001493    | GDI1      | -0.52 | NM_005091 | PGLYRP1      | -0.52 |
| NM_002162    | ICAM3     | -0.52 | NM_004773 | TRIP3        | -0.52 |
| NM_003250    | THRA      | -0.52 | NM_058242 | KRT6C        | -0.52 |
| NM_014567    | BCAR1     | -0.52 | NM_057176 | BSND         | -0.52 |
| NM_001923    | DDB1      | -0.52 | NM_003875 | GMPS         | -0.52 |
| XM_084530    | KIAA0033  | -0.52 | NM_000426 | LAMA2        | -0.52 |
| NM_000904    | NQO2      | -0.52 | NM_002664 | PLEK         | -0.52 |
| NM_002727    | PRG1      | -0.52 | NM_001729 | BTC          | -0.52 |
| NM_001682    | ATP2B1    | -0.52 | NM_021949 | ATP2B3       | -0.52 |
| NM_002065    | GLUL      | -0.52 | NM_005849 | IGSF6        | -0.52 |
| NM_014453    | BC-2      | -0.52 | NM_016053 | CGI-116      | -0.52 |
| NM_016067    | MRPS18C   | -0.52 | NM_018999 | KIAA1128     | -0.52 |
| NM_022099    | C20ORF51  | -0.52 | NM_022777 | RABL5        | -0.52 |
| NM_024296    | MGC1203   | -0.52 | NM_177477 | LYNX1        | -0.52 |
| NM_024809    | FLJ12975  | -0.52 | NM_032372 | MGC16186     | -0.52 |
| NM_052943    | MGC16491  | -0.52 | NM_181441 | MRPL55       | -0.52 |
| NM_080833    | C20ORF151 | -0.52 | NM_080574 | C20ORF70     | -0.52 |
| NM_144693    | ZNF558    | -0.52 | NM_152533 | MGC34728     | -0.52 |
| NM_175853    | LOC150759 | -0.52 | XM_117294 | LOC200933    | -0.52 |
| NM_173084    | TRIM59    | -0.52 | XM_094066 | LOC152877    | -0.52 |
| XM_208200    | LOC284387 | -0.52 | XM_372995 | LOC391553    | -0.52 |
| XM_372802    | LOC391123 | -0.52 | XM_371754 | LOC389301    | -0.52 |
| XM_376607    | LOC401335 | -0.52 | XM_376716 | LOC401429    | -0.52 |
| XM_375305    | LOC400506 | -0.52 | XM_373927 | LOC388815    | -0.52 |
| NM_001005495 | OR2T3     | -0.52 | NM_001896 | CSNK2A2      | -0.51 |
| NM_005565    | LCP2      | -0.51 | NM_002041 | GABPB2       | -0.51 |
| NM_002286    | LAG3      | -0.51 | NM_006498 | LGALS2       | -0.51 |
| NM_000059    | BRCA2     | -0.51 | NM_016135 | ETV7         | -0.51 |
| NM_130465    | FBXO23    | -0.51 | NM_021138 | TRAF2        | -0.51 |
| NM_007155    | ZP3       | -0.51 | NM_021005 | NR2F2        | -0.51 |
| NM_020632    | ATP6V0A4  | -0.51 | NM_004830 | CRSP3        | -0.51 |
| NM_001737    | C9        | -0.51 | NM_014694 | KIAA0605     | -0.51 |
| NM_014857    | HHL       | -0.51 | NM_002271 | KPNB3        | -0.51 |
| NM_000337    | SGCD      | -0.51 | NM_173702 | MTATP6       | -0.51 |
| NM_207517    | ADAMTSL3  | -0.51 | NM_015315 | LARP         | -0.51 |
| NM_002568    | PABPC1    | -0.51 | NM_013306 | SNX15        | -0.51 |
| NM_016319    | COPS7A    | -0.51 | NM_016332 | SEPX1        | -0.51 |
| NM_018061    | FLJ10330  | -0.51 | NM_018133 | FLJ10546     | -0.51 |
| NM_020971    | SPTBN4    | -0.51 | NM_024769 | ASAM         | -0.51 |
| XM_046437    | C20ORF50  | -0.51 | NM_030930 | UNC93B1      | -0.51 |
| NM_032036    | FAM14A    | -0.51 | NM_032126 | DKFZP564J047 | -0.51 |
| NM_032317    | WBSCR18   | -0.51 | NM_032649 | CNDP1        | -0.51 |
| NM_033211    | LOC90355  | -0.51 | NM_025077 | TOE1         | -0.51 |
| XM_040910    | C14ORF73  | -0.51 | NM_177963 | SYT12        | -0.51 |



|              |           |       |              |           |       |
|--------------|-----------|-------|--------------|-----------|-------|
| XM_372882    | LOC128954 | -0.51 | NM_080872    | UNC5D     | -0.51 |
| NM_194319    | ZNF542    | -0.51 | XM_376821    | C9ORF14   | -0.51 |
| XM_376874    | C9ORF71   | -0.51 | XM_170842    | FLJ40244  | -0.51 |
| NM_173590    | FLJ36102  | -0.51 | NM_198489    | DLNB14    | -0.51 |
| NM_194312    | LOC339768 | -0.51 | NM_175924    | MGC50831  | -0.51 |
| NM_198181    | LOC374676 | -0.51 | XM_098164    | LOC152122 | -0.51 |
| XM_294093    | LOC346171 | -0.51 | XM_069621    | LOC135946 | -0.51 |
| XM_294070    | LOC346085 | -0.51 | XM_298045    | LOC347475 | -0.51 |
| XM_379094    | LOC400953 | -0.51 | XM_371481    | LOC388931 | -0.51 |
| XM_379587    | LOC401464 | -0.51 | XM_378389    | LOC400084 | -0.51 |
| NM_001004329 | FLJ16139  | -0.51 | NM_004567    | PFKFB4    | -0.5  |
| NM_001390    | DTNA      | -0.5  | NM_006732    | FOSB      | -0.5  |
| NM_012484    | HMMR      | -0.5  | NM_003413    | ZIC3      | -0.5  |
| NM_016265    | ZNF325    | -0.5  | NM_021020    | LZTS1     | -0.5  |
| NM_003121    | SPIB      | -0.5  | NM_020299    | AKR1B10   | -0.5  |
| NM_001748    | CAPN2     | -0.5  | NM_002392    | MDM2      | -0.5  |
| NM_015376    | RASGRP3   | -0.5  | NM_002667    | PLN       | -0.5  |
| NM_005608    | PTPRCAP   | -0.5  | NM_014203    | AP2A1     | -0.5  |
| NM_005205    | COX6A2    | -0.5  | NM_022914    | 24432     | -0.5  |
| NM_007135    | ZNF79     | -0.5  | NM_003435    | ZNF134    | -0.5  |
| NM_005416    | SPRR3     | -0.5  | NM_004636    | SEMA3B    | -0.5  |
| NM_006688    | C1QL1     | -0.5  | NM_007266    | XAB1      | -0.5  |
| NM_152260    | C18B11    | -0.5  | NM_015931    | LOC51066  | -0.5  |
| NM_017445    | H2BFS     | -0.5  | NM_024662    | FLJ10774  | -0.5  |
| XM_087386    | HEG       | -0.5  | NM_022347    | IFRG15    | -0.5  |
| NM_023070    | LOC65243  | -0.5  | NM_030968    | C1QTNF1   | -0.5  |
| NM_080863    | ASB16     | -0.5  | NM_171998    | RAB39B    | -0.5  |
| NM_052968    | APOA5     | -0.5  | NM_152387    | FLJ31322  | -0.5  |
| XM_066058    | C20ORF174 | -0.5  | NM_152441    | FBXL14    | -0.5  |
| XM_371225    | LOC284729 | -0.5  | NM_207493    | FLJ44896  | -0.5  |
| XM_295598    | LOC343484 | -0.5  | XM_059578    | LOC132203 | -0.5  |
| XM_211251    | LOC283902 | -0.5  | XM_293160    | LOC343702 | -0.5  |
| XM_291663    | LOC340654 | -0.5  | XM_291270    | LOC340393 | -0.5  |
| XM_376819    | LOC401494 | -0.5  | XM_373487    | LOC387742 | -0.5  |
| XM_370876    | LOC388137 | -0.5  | XM_370829    | LOC388069 | -0.5  |
| XM_378793    | LOC400684 | -0.5  | NM_001005329 | OR51A4    | -0.5  |
| NM_152696    | HIPK1     | -0.49 | NM_006051    | APBB3     | -0.49 |
| XM_093895    | KIAA0882  | -0.49 | NM_003005    | SELP      | -0.49 |
| NM_000903    | NQO1      | -0.49 | NM_005738    | ARL4A     | -0.49 |
| NM_007082    | RABL2A    | -0.49 | NM_015071    | ARHGAP26  | -0.49 |
| NM_012162    | FBXL6     | -0.49 | NM_033223    | GABRG3    | -0.49 |
| NM_001761    | CCNF      | -0.49 | NM_020348    | CNNM1     | -0.49 |
| NM_005748    | YAF2      | -0.49 | NM_015160    | PMPCA     | -0.49 |
| NM_001500    | GMDS      | -0.49 | NM_018672    | ABCA5     | -0.49 |
| NM_003692    | TMEFF1    | -0.49 | XM_375660    | ZNF264    | -0.49 |
| NM_005835    | SLC17A2   | -0.49 | NM_014802    | KIAA0528  | -0.49 |

|           |               |       |              |               |       |
|-----------|---------------|-------|--------------|---------------|-------|
| NM_015055 | SWAP70        | -0.49 | NM_015653    | C22ORF11      | -0.49 |
| NM_016029 | DHRS7         | -0.49 | NM_017815    | C14ORF94      | -0.49 |
| NM_018405 | HSA272196     | -0.49 | NM_018275    | FLJ10925      | -0.49 |
| NM_022055 | KCNK12        | -0.49 | NM_024857    | FLJ12735      | -0.49 |
| NM_145169 | C6ORF83       | -0.49 | NM_152346    | MGC34680      | -0.49 |
| NM_145807 | LOC126147     | -0.49 | NM_133262    | ATP6V1G3      | -0.49 |
| NM_153011 | FLJ30594      | -0.49 | NM_145279    | MOBKL2C       | -0.49 |
| NM_153029 | FLJ31821      | -0.49 | NM_173801    | FLJ36198      | -0.49 |
| NM_173807 | MGC33370      | -0.49 | NM_173568    | FLJ36335      | -0.49 |
| XM_378886 | LOC284475     | -0.49 | XM_033704    | DKFZP434C184  | -0.49 |
| XM_208213 | LOC284541     | -0.49 | XM_208313    | LOC285321     | -0.49 |
| XM_376618 | LOC401356     | -0.49 | XM_376814    | LOC401487     | -0.49 |
| XM_374803 | LOC399763     | -0.49 | XM_378273    | LOC399867     | -0.49 |
| XM_379006 | LOC400865     | -0.49 | NM_001005286 | OR6F1         | -0.49 |
| NM_006343 | MERTK         | -0.48 | NM_173598    | KSR2          | -0.48 |
| NM_178564 | LOC340371     | -0.48 | NM_005282    | GPR4          | -0.48 |
| NM_023922 | TAS2R14       | -0.48 | NM_014391    | ANKRD1        | -0.48 |
| NM_174980 | VN1R3         | -0.48 | NM_005029    | PITX3         | -0.48 |
| NM_003204 | NFE2L1        | -0.48 | NM_003739    | AKR1C3        | -0.48 |
| NM_000120 | EPHX1         | -0.48 | NM_005440    | ARHN          | -0.48 |
| NM_018727 | TRPV1         | -0.48 | NM_002840    | PTPRF         | -0.48 |
| NM_000526 | KRT14         | -0.48 | NM_014078    | MRPL13        | -0.48 |
| NM_030582 | COL18A1       | -0.48 | NM_005513    | GTF2E1        | -0.48 |
| NM_006996 | SLC19A2       | -0.48 | NM_001046    | SLC12A2       | -0.48 |
| NM_006997 | TACC2         | -0.48 | NM_001636    | SLC25A6       | -0.48 |
| NM_001740 | CALB2         | -0.48 | NM_001476    | GAGE6         | -0.48 |
| NM_175617 | MT1E          | -0.48 | NM_030673    | SEC13L1       | -0.48 |
| NM_003094 | SNRPE         | -0.48 | NM_021018    | HIST1H3F      | -0.48 |
| NM_014731 | PROSAPIP1     | -0.48 | NM_014608    | CYFIP1        | -0.48 |
| XM_371179 | FBXO46        | -0.48 | NM_014392    | D4S234E       | -0.48 |
| NM_017424 | CECR1         | -0.48 | NM_017600    | DKFZP434M0331 | -0.48 |
| NM_018279 | TMEM19        | -0.48 | NM_020232    | TNFSF5IP1     | -0.48 |
| NM_021218 | C9ORF80       | -0.48 | XM_048128    | KIAA1596      | -0.48 |
| XM_371848 | C6ORF115      | -0.48 | NM_021928    | FLJ22649      | -0.48 |
| NM_021630 | PDLIM2        | -0.48 | NM_022137    | SMOC1         | -0.48 |
| NM_024687 | FLJ23049      | -0.48 | NM_025058    | TRIM46        | -0.48 |
| NM_033017 | TRIM4         | -0.48 | NM_138381    | MGC15763      | -0.48 |
| NM_152341 | FLJ30002      | -0.48 | NM_144625    | FLJ32978      | -0.48 |
| NM_178819 | DKFZP586M1819 | -0.48 | NM_152463    | EME1          | -0.48 |
| NM_080873 | ASB11         | -0.48 | NM_130900    | RAET1L        | -0.48 |
| NM_172005 | WFDC13        | -0.48 | NM_020865    | DHX36         | -0.48 |
| NM_145022 | C10ORF25      | -0.48 | NM_153267    | MAMDC2        | -0.48 |
| NM_199227 | MAP1D         | -0.48 | XM_379069    | LOC339822     | -0.48 |
| NM_182610 | SAMD7         | -0.48 | XM_209695    | LOC285643     | -0.48 |
| XM_209423 | LOC284964     | -0.48 | XM_209554    | LOC285299     | -0.48 |
| XM_378852 | LOC400748     | -0.48 | XM_374103    | LOC389252     | -0.48 |

|              |           |       |           |           |       |
|--------------|-----------|-------|-----------|-----------|-------|
| XM_379905    | LOC402576 | -0.48 | XM_374589 | LOC392848 | -0.48 |
| XM_375378    | LOC400549 | -0.48 | XM_372876 | LOC391269 | -0.48 |
| NM_001001888 | VCX-C     | -0.48 | NM_016231 | NLK       | -0.47 |
| NM_005163    | AKT1      | -0.47 | NM_005242 | F2RL1     | -0.47 |
| NM_001407    | CELSR3    | -0.47 | NM_001747 | CAPG      | -0.47 |
| NM_004216    | DEDD      | -0.47 | NM_003675 | PRPF18    | -0.47 |
| NM_018935    | PCDHB15   | -0.47 | NM_002961 | S100A4    | -0.47 |
| NM_000693    | ALDH1A3   | -0.47 | NM_002130 | HMGCS1    | -0.47 |
| NM_003761    | VAMP8     | -0.47 | NM_000536 | RAG2      | -0.47 |
| NM_017414    | USP18     | -0.47 | NM_020774 | MIB1      | -0.47 |
| NM_002182    | IL1RAP    | -0.47 | NM_002634 | PHB       | -0.47 |
| NM_005183    | CACNA1F   | -0.47 | NM_144585 | SLC22A12  | -0.47 |
| NM_030932    | DIAPH3    | -0.47 | NM_000562 | C8A       | -0.47 |
| NM_004403    | DFNA5     | -0.47 | NM_001322 | CST2      | -0.47 |
| NM_144646    | IGJ       | -0.47 | NM_000786 | CYP51A1   | -0.47 |
| NM_004153    | ORC1L     | -0.47 | NM_004549 | NDUFC2    | -0.47 |
| NM_007147    | ZNF175    | -0.47 | NM_003492 | CXORF12   | -0.47 |
| NM_006987    | RPH3AL    | -0.47 | NM_005500 | SAE1      | -0.47 |
| NM_014767    | SPOCK2    | -0.47 | NM_015694 | KIAA1285  | -0.47 |
| NM_017819    | RG9MTD1   | -0.47 | NM_018509 | PRO1855   | -0.47 |
| NM_018453    | C14ORF11  | -0.47 | NM_019117 | KLHL4     | -0.47 |
| XM_371084    | KIAA1447  | -0.47 | XM_291015 | KIDINS220 | -0.47 |
| NM_021815    | SLC5A7    | -0.47 | NM_021186 | ZP4       | -0.47 |
| NM_020875    | FRAS1     | -0.47 | NM_032907 | BMSC-UBP  | -0.47 |
| NM_138446    | C7ORF30   | -0.47 | NM_173473 | C10ORF104 | -0.47 |
| NM_153634    | CPNE8     | -0.47 | NM_020828 | ZFP28     | -0.47 |
| NM_144710    | 40422     | -0.47 | NM_203406 | LOC153364 | -0.47 |
| NM_175884    | FLJ36031  | -0.47 | NM_178842 | LASS3     | -0.47 |
| NM_173559    | FLJ25791  | -0.47 | NM_173646 | FLJ39660  | -0.47 |
| XM_292819    | NANOS3    | -0.47 | NM_183059 | C1ORF36   | -0.47 |
| NM_182605    | FLJ40448  | -0.47 | NM_205841 | MGC21394  | -0.47 |
| XM_211816    | LOC285248 | -0.47 | XM_295007 | LOC339583 | -0.47 |
| XM_209076    | LOC284232 | -0.47 | XM_071013 | LOC138652 | -0.47 |
| XM_379408    | LOC401255 | -0.47 | XM_372445 | LOC390278 | -0.47 |
| XM_371165    | LOC388538 | -0.47 | NM_004274 | AKAP6     | -0.46 |
| NM_032571    | EMR3      | -0.46 | NM_004072 | CMKLR1    | -0.46 |
| NM_012202    | GNG3      | -0.46 | NM_002649 | PIK3CG    | -0.46 |
| NM_033282    | OPN4      | -0.46 | NM_022111 | CLSPN     | -0.46 |
| NM_001731    | BTG1      | -0.46 | NM_032584 | ZNF347    | -0.46 |
| NM_018419    | SOX18     | -0.46 | NM_004176 | SREBF1    | -0.46 |
| NM_005518    | HMGCS2    | -0.46 | NM_002421 | MMP1      | -0.46 |
| NM_004082    | DCTN1     | -0.46 | NM_002847 | PTPRN2    | -0.46 |
| NM_003743    | NCOA1     | -0.46 | NM_000335 | SCN5A     | -0.46 |
| NM_031885    | BBS2      | -0.46 | NM_019084 | CCNJ      | -0.46 |
| NM_005542    | INSIG1    | -0.46 | NM_005705 | PHEMX     | -0.46 |
| NM_145208    | MBD3L1    | -0.46 | NM_052877 | MED8      | -0.46 |

|           |              |       |           |               |       |
|-----------|--------------|-------|-----------|---------------|-------|
| NM_014109 | ATAD2        | -0.46 | NM_004059 | CCBL1         | -0.46 |
| NM_001998 | FBLN2        | -0.46 | NM_004084 | DEFA1         | -0.46 |
| XM_031401 | EGFL3        | -0.46 | NM_005560 | LAMA5         | -0.46 |
| NM_003501 | ACOX3        | -0.46 | NM_002643 | PIGF          | -0.46 |
| NM_031246 | PSG2         | -0.46 | NM_003291 | TPP2          | -0.46 |
| NM_005638 | SYBL1        | -0.46 | NM_014519 | ZNF232        | -0.46 |
| NM_004660 | DDX3Y        | -0.46 | NM_006590 | USP39         | -0.46 |
| NM_006387 | CHERP        | -0.46 | NM_006405 | TM9SF1        | -0.46 |
| NM_006780 | SMA3         | -0.46 | NM_014893 | NLGN4Y        | -0.46 |
| NM_014934 | DZIP1        | -0.46 | NM_012342 | BAMBI         | -0.46 |
| NM_013252 | CLECSF5      | -0.46 | NM_019598 | KLK12         | -0.46 |
| NM_018105 | THAP1        | -0.46 | NM_020231 | MDS010        | -0.46 |
| NM_152233 | SNX6         | -0.46 | NM_024041 | SCNM1         | -0.46 |
| NM_024834 | C10ORF119    | -0.46 | NM_024899 | C18ORF9       | -0.46 |
| NM_052959 | PANX3        | -0.46 | NM_152509 | FLJ31568      | -0.46 |
| NM_144984 | C10ORF72     | -0.46 | NM_153036 | C6ORF78       | -0.46 |
| XM_379099 | LOC339807    | -0.46 | NM_020063 | BARHL2        | -0.46 |
| XM_372110 | LOC375719    | -0.46 | XM_085236 | LOC145788     | -0.46 |
| XM_065278 | LOC129521    | -0.46 | XM_292784 | LOC339351     | -0.46 |
| XM_374460 | LOC155081    | -0.46 | XM_371796 | LOC389364     | -0.46 |
| XM_379848 | LOC402521    | -0.46 | XM_373524 | LOC387833     | -0.46 |
| NM_000682 | ADRA2B       | -0.45 | NM_018485 | GPR77         | -0.45 |
| NM_016235 | GPRC5B       | -0.45 | NM_000513 | OPN1MW        | -0.45 |
| NM_005292 | GPR18        | -0.45 | NM_172027 | ABTB1         | -0.45 |
| NM_176810 | NALP13       | -0.45 | NM_019105 | TNXB          | -0.45 |
| NM_021240 | DMRT3        | -0.45 | NM_001154 | ANXA5         | -0.45 |
| NM_002655 | PLAG1        | -0.45 | NM_002076 | GNS           | -0.45 |
| NM_003295 | TPT1         | -0.45 | NM_004347 | CASP5         | -0.45 |
| NM_013438 | UBQLN1       | -0.45 | NM_000762 | CYP2A6        | -0.45 |
| XM_040265 | KIAA0217     | -0.45 | NM_013367 | ANAPC4        | -0.45 |
| NM_003637 | ITGA10       | -0.45 | NM_001119 | ADD1          | -0.45 |
| NM_000387 | SLC25A20     | -0.45 | NM_006316 | MYCNOS        | -0.45 |
| NM_153207 | AEBP2        | -0.45 | NM_003284 | TNP1          | -0.45 |
| XM_375024 | UTP14C       | -0.45 | NM_181581 | PP35          | -0.45 |
| NM_014553 | TFCP2L1      | -0.45 | NM_017983 | FLJ10055      | -0.45 |
| NM_018713 | ZNT8         | -0.45 | NM_018475 | TPARL         | -0.45 |
| NM_152278 | MGC23947     | -0.45 | NM_022661 | SPANXC        | -0.45 |
| NM_024044 | MGC5178      | -0.45 | NM_024519 | FLJ13725      | -0.45 |
| NM_025083 | FLJ21128     | -0.45 | NM_031291 | DKFZP434N1235 | -0.45 |
| NM_032029 | FKSG87       | -0.45 | NM_032307 | C9ORF64       | -0.45 |
| NM_032592 | PHACS        | -0.45 | NM_033212 | MGC10992      | -0.45 |
| NM_053052 | IMAGE3451454 | -0.45 | NM_145249 | FAM14B        | -0.45 |
| NM_178466 | C20ORF71     | -0.45 | NM_153215 | FLJ38608      | -0.45 |
| NM_138797 | LOC129138    | -0.45 | NM_130898 | CREB3L4       | -0.45 |
| NM_145174 | DNAJB7       | -0.45 | NM_144721 | THAP6         | -0.45 |
| NM_182558 | FLJ33810     | -0.45 | XM_171224 | CARM1L        | -0.45 |

|              |           |       |           |           |       |
|--------------|-----------|-------|-----------|-----------|-------|
| NM_207357    | LOC339524 | -0.45 | XM_096676 | LOC144762 | -0.45 |
| XM_373977    | LOC388934 | -0.45 | XM_373101 | LOC391849 | -0.45 |
| XM_374136    | LOC389325 | -0.45 | XM_379904 | LOC402575 | -0.45 |
| XM_379803    | LOC402477 | -0.45 | XM_373588 | LOC387983 | -0.45 |
| XM_370958    | LOC388237 | -0.45 | XM_373351 | LOC392473 | -0.45 |
| NM_001005469 | OR5B3     | -0.45 | NM_025224 | BTBD4     | -0.45 |
| NM_005261    | GEM       | -0.44 | NM_018900 | PCDHA1    | -0.44 |
| NM_003469    | SCG2      | -0.44 | NM_019558 | HOXD8     | -0.44 |
| NM_000310    | PPT1      | -0.44 | NM_006266 | RALGDS    | -0.44 |
| NM_015382    | HECTD1    | -0.44 | NM_000873 | ICAM2     | -0.44 |
| NM_001181    | ASGR2     | -0.44 | NM_006533 | MIA       | -0.44 |
| NM_001432    | EREG      | -0.44 | NM_005245 | FAT       | -0.44 |
| NM_005031    | FXYD1     | -0.44 | NM_003657 | BCAS1     | -0.44 |
| NM_003801    | GPAA1     | -0.44 | NM_025092 | FLJ22635  | -0.44 |
| NM_016250    | NDRG2     | -0.44 | NM_139247 | ADCY4     | -0.44 |
| NM_003211    | TDG       | -0.44 | NM_006992 | B7        | -0.44 |
| NM_006774    | INMT      | -0.44 | NM_014912 | CPEB3     | -0.44 |
| XM_371542    | RW1       | -0.44 | NM_014357 | LCE2B     | -0.44 |
| NM_016496    | LOC51257  | -0.44 | NM_015916 | FAM26B    | -0.44 |
| NM_016391    | HSPC111   | -0.44 | NM_018053 | FLJ10307  | -0.44 |
| NM_020336    | KIAA1219  | -0.44 | NM_018689 | KIAA1199  | -0.44 |
| XM_034717    | KIAA0493  | -0.44 | XM_290941 | PRNPIP    | -0.44 |
| NM_024539    | RNF128    | -0.44 | NM_024873 | TNIP3     | -0.44 |
| NM_024900    | PHF17     | -0.44 | NM_032726 | PLCD4     | -0.44 |
| XM_290629    | C14ORF78  | -0.44 | NM_015163 | TRIM9     | -0.44 |
| NM_144634    | MGC26768  | -0.44 | NM_145651 | RYD5      | -0.44 |
| XM_376677    | LOC155006 | -0.44 | NM_144964 | RG9MTD3   | -0.44 |
| NM_153228    | FLJ38335  | -0.44 | XM_375646 | ZNF525    | -0.44 |
| XM_374915    | LOC283219 | -0.44 | NM_173573 | MGC35138  | -0.44 |
| XM_379691    | LOC284600 | -0.44 | XM_209655 | LOC285544 | -0.44 |
| XM_010658    | LOC159184 | -0.44 | XM_171165 | LOC253289 | -0.44 |
| XM_293334    | LOC340554 | -0.44 | XM_376560 | LOC401295 | -0.44 |
| XM_377941    | LOC402269 | -0.44 | XM_378449 | LOC400201 | -0.44 |
| NM_001001394 | HCG3      | -0.44 | XM_378103 | LOC402388 | -0.44 |
| XM_371466    | LOC388900 | -0.44 | NM_015716 | MINK      | -0.43 |
| NM_030952    | SNARK     | -0.43 | NM_018096 | FLJ10458  | -0.43 |
| NM_018841    | GNG12     | -0.43 | NM_014499 | P2RY10    | -0.43 |
| NM_003967    | PNR       | -0.43 | NM_001157 | ANXA11    | -0.43 |
| NM_181711    | GRASP     | -0.43 | NM_003075 | SMARCC2   | -0.43 |
| NM_005421    | TAL2      | -0.43 | NM_000306 | POU1F1    | -0.43 |
| NM_005354    | JUND      | -0.43 | NM_001872 | CPB2      | -0.43 |
| NM_004744    | LRAT      | -0.43 | NM_003348 | UBE2N     | -0.43 |
| NM_000229    | LCAT      | -0.43 | NM_007068 | DMC1      | -0.43 |
| NM_005223    | DNASE1    | -0.43 | NM_003460 | ZP2       | -0.43 |
| NM_005219    | DIAPH1    | -0.43 | NM_002468 | MYD88     | -0.43 |
| NM_014999    | RAB21     | -0.43 | NM_031296 | RAB33B    | -0.43 |

|           |               |       |           |              |       |
|-----------|---------------|-------|-----------|--------------|-------|
| NM_020247 | CABC1         | -0.43 | NM_017623 | CNNM3        | -0.43 |
| NM_004986 | KTN1          | -0.43 | NM_005601 | NKG7         | -0.43 |
| NM_004764 | PIWIL1        | -0.43 | NM_018343 | RIOK2        | -0.43 |
| NM_001289 | CLIC2         | -0.43 | NM_173713 | MTND5        | -0.43 |
| NM_006913 | RNF5          | -0.43 | NM_002761 | PRM1         | -0.43 |
| NM_021998 | ZNF6          | -0.43 | NM_004872 | C1ORF8       | -0.43 |
| NM_015136 | STAB1         | -0.43 | XM_039733 | KIAA0953     | -0.43 |
| NM_014313 | SMP1          | -0.43 | NM_012427 | KLK5         | -0.43 |
| NM_012385 | P8            | -0.43 | NM_015610 | DKFZP434J154 | -0.43 |
| NM_016068 | TTC11         | -0.43 | NM_018968 | SNTG2        | -0.43 |
| NM_016462 | TMEM14C       | -0.43 | NM_017654 | FLJ20073     | -0.43 |
| NM_018381 | FLJ11286      | -0.43 | NM_020143 | LOC56902     | -0.43 |
| XM_106386 | KIAA1345      | -0.43 | NM_022144 | TNMD         | -0.43 |
| NM_024306 | FA2H          | -0.43 | XM_376331 | KIAA1680     | -0.43 |
| NM_030580 | ZNF34         | -0.43 | NM_024893 | C20ORF39     | -0.43 |
| XM_373675 | LOC90835      | -0.43 | NM_152343 | FLJ25414     | -0.43 |
| XM_292778 | LRRC4B        | -0.43 | XM_375695 | LOC126917    | -0.43 |
| XM_377720 | LOC150356     | -0.43 | NM_152531 | FLJ35155     | -0.43 |
| NM_152578 | FMR1NB        | -0.43 | NM_138329 | NALP6        | -0.43 |
| NM_145316 | C6ORF128      | -0.43 | XM_292260 | SLC35F4      | -0.43 |
| NM_207408 | FLJ27505      | -0.43 | NM_207498 | FLJ43093     | -0.43 |
| XM_379318 | LOC401176     | -0.43 | XM_379897 | LOC402571    | -0.43 |
| NM_206899 | OR10P1        | -0.43 | NM_033115 | MGC16169     | -0.42 |
| NM_002649 | PIK3CG        | -0.42 | NM_080817 | GPR82        | -0.42 |
| NM_014341 | MTCH1         | -0.42 | NM_006311 | NCOR1        | -0.42 |
| NM_014176 | HSPC150       | -0.42 | NM_012455 | TIC          | -0.42 |
| NM_018177 | N4BP2         | -0.42 | NM_005940 | MMP11        | -0.42 |
| NM_016186 | SERPINA10     | -0.42 | NM_000566 | FCGR1A       | -0.42 |
| NM_021229 | NTN4          | -0.42 | NM_003226 | TFF3         | -0.42 |
| NM_003780 | B4GALT2       | -0.42 | NM_014568 | GALNT5       | -0.42 |
| NM_014318 | 37347         | -0.42 | NM_017714 | C20ORF13     | -0.42 |
| NM_018717 | MAML3         | -0.42 | NM_018047 | RBM22        | -0.42 |
| NM_018347 | C20ORF29      | -0.42 | NM_022917 | NOL6         | -0.42 |
| NM_024520 | FLJ22555      | -0.42 | NM_024818 | UBE1DC1      | -0.42 |
| NM_025146 | MAK3          | -0.42 | NM_022073 | EGLN3        | -0.42 |
| XM_376254 | DKFZP667G2110 | -0.42 | XM_085234 | UNC13C       | -0.42 |
| NM_152547 | BTNL9         | -0.42 | NM_152628 | MGC39715     | -0.42 |
| NM_152716 | FLJ36874      | -0.42 | NM_148675 | DSCR9        | -0.42 |
| XM_211529 | LOC284591     | -0.42 | NM_174947 | C19ORF30     | -0.42 |
| NM_178544 | ZNF546        | -0.42 | NM_198994 | TGM6         | -0.42 |
| XM_170950 | LOC254897     | -0.42 | XM_373290 | LOC392314    | -0.42 |
| XM_379853 | LOC402527     | -0.42 | XM_378202 | LOC399707    | -0.42 |
| XM_372563 | LOC390566     | -0.42 | XM_370904 | LOC388173    | -0.42 |
| XM_370909 | LOC388177     | -0.42 | XM_373750 | LOC388421    | -0.42 |
| NM_004105 | EFEMP1        | -0.41 | NM_002417 | MKI67        | -0.41 |
| NM_014598 | SOCS7         | -0.41 | NM_005522 | HOXA1        | -0.41 |

|           |               |       |           |               |       |
|-----------|---------------|-------|-----------|---------------|-------|
| NM_000695 | ALDH3B2       | -0.41 | NM_002641 | PIGA          | -0.41 |
| NM_016020 | TFB1M         | -0.41 | NM_002900 | RBP3          | -0.41 |
| NM_000503 | EYA1          | -0.41 | NM_002335 | LRP5          | -0.41 |
| NM_002850 | PTPRS         | -0.41 | NM_000729 | CCK           | -0.41 |
| NM_004093 | EFNB2         | -0.41 | NM_005247 | FGF3          | -0.41 |
| NM_006530 | GAS41         | -0.41 | NM_006744 | RBP4          | -0.41 |
| NM_153700 | STRC          | -0.41 | NM_003975 | SH2D2A        | -0.41 |
| XM_371214 | PLCL4         | -0.41 | NM_006114 | TOMM40        | -0.41 |
| NM_015419 | DKFZP564I1922 | -0.41 | NM_017565 | FAM20A        | -0.41 |
| NM_018240 | KIRREL        | -0.41 | NM_018283 | NUDT15        | -0.41 |
| NM_018026 | PACS1         | -0.41 | NM_021935 | PROK2         | -0.41 |
| NM_024759 | FLJ13955      | -0.41 | NM_024895 | PDZK7         | -0.41 |
| NM_032228 | MLSTD2        | -0.41 | NM_173465 | COL23A1       | -0.41 |
| NM_145039 | MGC16385      | -0.41 | NM_033416 | IMP4          | -0.41 |
| NM_017954 | CADPS2        | -0.41 | NM_170694 | SERHL         | -0.41 |
| NM_022754 | SFXN1         | -0.41 | NM_080607 | C20ORF102     | -0.41 |
| NM_144649 | FLJ33069      | -0.41 | NM_174906 | MGC39724      | -0.41 |
| NM_152889 | CHST13        | -0.41 | XM_088683 | DGAT2L4       | -0.41 |
| NM_130810 | DYX1C1        | -0.41 | XM_375027 | OR7E156P      | -0.41 |
| XM_379195 | LOC285401     | -0.41 | NM_178175 | LHFPL1        | -0.41 |
| NM_181615 | KRTAP20-1     | -0.41 | XM_379098 | LOC339803     | -0.41 |
| NM_199005 | ZNF322B       | -0.41 | NM_198526 | DKFZP547K1113 | -0.41 |
| NM_207465 | FLJ45337      | -0.41 | XM_166966 | LOC220429     | -0.41 |
| NM_203425 | LOC388407     | -0.41 | XM_209728 | LOC285703     | -0.41 |
| XM_113228 | LOC196266     | -0.41 | XM_372707 | LOC390880     | -0.41 |
| XM_379887 | LOC402565     | -0.41 | NM_001365 | DLG4          | -0.4  |
| NM_153445 | OR5P3         | -0.4  | NM_001254 | CDC6          | -0.4  |
| NM_005872 | BCAS2         | -0.4  | NM_005806 | OLIG2         | -0.4  |
| NM_003118 | SPARC         | -0.4  | NM_006951 | TAF5          | -0.4  |
| NM_004231 | ATP6V1F       | -0.4  | NM_001359 | DECR1         | -0.4  |
| NM_003676 | DEGS          | -0.4  | NM_000932 | PLCB3         | -0.4  |
| NM_000057 | BLM           | -0.4  | NM_021978 | ST14          | -0.4  |
| NM_013433 | TNPO2         | -0.4  | NM_000102 | CYP17A1       | -0.4  |
| NM_004526 | MCM2          | -0.4  | NM_000110 | DPYD          | -0.4  |
| NM_002716 | PPP2R1B       | -0.4  | NM_006384 | CIB1          | -0.4  |
| NM_001331 | CTNND1        | -0.4  | NM_004689 | MTA1          | -0.4  |
| NM_000574 | DAF           | -0.4  | NM_003561 | PLA2G10       | -0.4  |
| NM_004339 | PTTG1IP       | -0.4  | NM_001822 | CHN1          | -0.4  |
| NM_000780 | CYP7A1        | -0.4  | XM_208352 | ADH5B         | -0.4  |
| NM_004630 | SF1           | -0.4  | NM_007173 | SPUVE         | -0.4  |
| NM_015103 | PLXND1        | -0.4  | NM_014933 | SEC31L1       | -0.4  |
| NM_015187 | KIAA0746      | -0.4  | NM_001477 | GAGE7B        | -0.4  |
| NM_019062 | FLJ20225      | -0.4  | NM_016538 | SIRT7         | -0.4  |
| NM_138284 | IL17D         | -0.4  | NM_018337 | ZNF444        | -0.4  |
| NM_032309 | CHCHD5        | -0.4  | NM_032514 | MAP1LC3A      | -0.4  |
| XM_372194 | MGC13275      | -0.4  | XM_027658 | FNDC1         | -0.4  |

|              |           |       |           |           |       |
|--------------|-----------|-------|-----------|-----------|-------|
| NM_033059    | KRTAP4-14 | -0.4  | NM_145244 | DDIT4L    | -0.4  |
| NM_152308    | MGC24665  | -0.4  | NM_152284 | SHAX3     | -0.4  |
| NM_052857    | MGC20398  | -0.4  | XM_058513 | LRRK2     | -0.4  |
| NM_152332    | MTAC2D1   | -0.4  | NM_177549 | LOC149830 | -0.4  |
| NM_130902    | COX7B2    | -0.4  | XM_166376 | KIAA1949  | -0.4  |
| NM_145291    | ZNF509    | -0.4  | NM_152587 | MGC33948  | -0.4  |
| NM_206996    | PF6       | -0.4  | NM_207348 | LOC284723 | -0.4  |
| XM_291326    | KIAA2022  | -0.4  | XM_374319 | LOC339457 | -0.4  |
| NM_198502    | FLJ43826  | -0.4  | XM_208443 | LOC286526 | -0.4  |
| NM_198510    | UNQ6369   | -0.4  | XM_372199 | FLJ16518  | -0.4  |
| NM_207445    | FLJ39531  | -0.4  | XM_016093 | LOC143243 | -0.4  |
| XM_374117    | LOC389275 | -0.4  | XM_379518 | LOC401400 | -0.4  |
| XM_374751    | LOC392790 | -0.4  | XM_380011 | LOC402669 | -0.4  |
| XM_375108    | LOC400258 | -0.4  | XM_377122 | LOC401646 | -0.4  |
| XM_372378    | LOC390121 | -0.4  | XM_378807 | LOC400704 | -0.4  |
| XM_373721    | LOC388358 | -0.4  | XM_378573 | LOC400512 | -0.4  |
| NM_033516    | NYD-SP25  | -0.39 | NM_004297 | GNA14     | -0.39 |
| NM_005272    | GNAT2     | -0.39 | NM_003902 | FUBP1     | -0.39 |
| NM_004357    | CD151     | -0.39 | NM_004430 | EGR3      | -0.39 |
| NM_031944    | MIXL1     | -0.39 | NM_001290 | LDB2      | -0.39 |
| NM_014272    | ADAMTS7   | -0.39 | NM_004295 | TRAF4     | -0.39 |
| NM_001100    | ACTA1     | -0.39 | NM_152422 | PTPDC1    | -0.39 |
| NM_001709    | BDNF      | -0.39 | NM_005563 | STMN1     | -0.39 |
| NM_005118    | TNFSF15   | -0.39 | NM_000966 | RARG      | -0.39 |
| NM_000578    | SLC11A1   | -0.39 | NM_015665 | AAAS      | -0.39 |
| NM_003658    | BARX2     | -0.39 | NM_017955 | CDCA4     | -0.39 |
| NM_001233    | CAV2      | -0.39 | NM_016221 | DCTN4     | -0.39 |
| NM_002157    | HSPE1     | -0.39 | NM_017440 | MDM1      | -0.39 |
| NM_022045    | MTBP      | -0.39 | NM_030808 | NDEL1     | -0.39 |
| NM_004055    | CAPN5     | -0.39 | NM_004138 | KRTHA3A   | -0.39 |
| NM_019109    | ALG1      | -0.39 | NM_002802 | PSMC1     | -0.39 |
| NM_003058    | SLC22A2   | -0.39 | NM_004182 | UXT       | -0.39 |
| NM_014872    | ZBTB5     | -0.39 | NM_212481 | ARID5A    | -0.39 |
| NM_015229    | KIAA0664  | -0.39 | NM_014007 | ZNF297B   | -0.39 |
| NM_012105    | BACE2     | -0.39 | NM_016037 | CGI-94    | -0.39 |
| NM_018473    | THEM2     | -0.39 | NM_019557 | LOC56181  | -0.39 |
| NM_020064    | BARHL1    | -0.39 | NM_023924 | BRD9      | -0.39 |
| NM_024639    | ZNF322A   | -0.39 | NM_024557 | RIC3      | -0.39 |
| NM_025008    | FLJ13544  | -0.39 | NM_025196 | GRPEL1    | -0.39 |
| NM_032433    | ZNF333    | -0.39 | NM_032621 | BEX2      | -0.39 |
| NM_032864    | FLJ14936  | -0.39 | NM_144569 | FLJ25348  | -0.39 |
| NM_130896    | WFDC8     | -0.39 | NM_014914 | CENTG2    | -0.39 |
| NM_138399    | LOC93109  | -0.39 | XM_058661 | C14ORF35  | -0.39 |
| NM_130809    | LOC133619 | -0.39 | NM_138467 | LOC127253 | -0.39 |
| NM_001001660 | LOC144363 | -0.39 | NM_152515 | FLJ40629  | -0.39 |
| NM_152585    | MGC33094  | -0.39 | NM_173563 | C6ORF146  | -0.39 |



|           |           |       |              |           |       |
|-----------|-----------|-------|--------------|-----------|-------|
| NM_182569 | FLJ37451  | -0.39 | NM_173608    | C14ORF80  | -0.39 |
| NM_182570 | FLJ25715  | -0.39 | NM_178172    | LOC338328 | -0.39 |
| NM_207375 | UNQ5792   | -0.39 | NM_207340    | LOC254359 | -0.39 |
| NM_207499 | FLJ41841  | -0.39 | XM_085722    | LOC147166 | -0.39 |
| XM_209489 | LOC285141 | -0.39 | XM_071093    | LOC138799 | -0.39 |
| XM_377886 | LOC402209 | -0.39 | XM_374177    | LOC389415 | -0.39 |
| XM_372583 | LOC390613 | -0.39 | XM_372676    | LOC390801 | -0.39 |
| XM_375639 | LOC400714 | -0.39 | XM_372679    | LOC390812 | -0.39 |
| XM_371111 | LOC388469 | -0.39 | NM_001005325 | OR6M1     | -0.39 |
| NM_213720 | C22ORF16  | -0.39 | XM_380026    | LOC402682 | -0.39 |
| NM_001894 | CSNK1E    | -0.38 | NM_005876    | APEG1     | -0.38 |
| NM_006716 | ASK       | -0.38 | NM_002744    | PRKCZ     | -0.38 |
| NM_000294 | PHKG2     | -0.38 | NM_004612    | TGFBR1    | -0.38 |
| NM_003328 | TXK       | -0.38 | NM_004392    | DACH1     | -0.38 |
| NM_012134 | LMOD1     | -0.38 | XM_052620    | MAN2B2    | -0.38 |
| NM_001440 | EXTL3     | -0.38 | NM_002526    | NT5E      | -0.38 |
| NM_003330 | TXNRD1    | -0.38 | NM_006310    | NPEPPS    | -0.38 |
| NM_006197 | PCM1      | -0.38 | NM_022151    | MOAP1     | -0.38 |
| NM_000114 | EDN3      | -0.38 | NM_175068    | K6IRS3    | -0.38 |
| NM_012404 | ANP32D    | -0.38 | NM_002973    | SCA2      | -0.38 |
| NM_012235 | SCAP      | -0.38 | NM_006096    | NDRG1     | -0.38 |
| NM_001967 | EIF4A2    | -0.38 | NM_006305    | ANP32A    | -0.38 |
| NM_003513 | HIST1H2AB | -0.38 | NM_003708    | RODH-4    | -0.38 |
| NM_015044 | GGA2      | -0.38 | NM_016609    | SLC22A17  | -0.38 |
| NM_014590 | ERVWE1    | -0.38 | NM_016403    | HSPC148   | -0.38 |
| NM_017885 | HCFC1R1   | -0.38 | NM_018157    | HSYN      | -0.38 |
| NM_018368 | C6ORF209  | -0.38 | NM_020139    | DHRS6     | -0.38 |
| NM_019556 | MOSPD1    | -0.38 | NM_020820    | PREX1     | -0.38 |
| NM_022897 | RANBP17   | -0.38 | NM_152261    | MGC17943  | -0.38 |
| NM_052940 | MGC8974   | -0.38 | NM_152733    | BTBD9     | -0.38 |
| NM_139161 | CRB3      | -0.38 | NM_144607    | FLJ32499  | -0.38 |
| NM_175614 | NDUFA11   | -0.38 | NM_152372    | FLJ35961  | -0.38 |
| NM_175887 | LOC222171 | -0.38 | XM_374976    | LOC283331 | -0.38 |
| NM_198486 | RPL7L1    | -0.38 | NM_182626    | FLJ25102  | -0.38 |
| XM_208847 | LOC283804 | -0.38 | XM_295062    | LOC339782 | -0.38 |
| XM_291016 | LOC339804 | -0.38 | XM_097792    | LOC150051 | -0.38 |
| XM_167152 | LOC222701 | -0.38 | XM_379075    | LOC400942 | -0.38 |
| XM_376334 | LOC401147 | -0.38 | XM_379424    | LOC401268 | -0.38 |
| XM_380095 | LOC402472 | -0.38 | XM_374261    | LOC389642 | -0.38 |
| XM_375928 | LOC400855 | -0.38 | NM_001005500 | OR4M1     | -0.38 |
| NM_000733 | CD3E      | -0.37 | NM_004672    | MAP3K6    | -0.37 |
| NM_002730 | PRKACA    | -0.37 | NM_005592    | MUSK      | -0.37 |
| NM_153838 | GPR115    | -0.37 | NM_007158    | D1S155E   | -0.37 |
| NM_002210 | ITGAV     | -0.37 | NM_006361    | HOXB13    | -0.37 |
| NM_003112 | SP4       | -0.37 | NM_130767    | CACH-1    | -0.37 |
| NM_004035 | ACOX1     | -0.37 | NM_001303    | COX10     | -0.37 |

|           |           |       |              |           |       |
|-----------|-----------|-------|--------------|-----------|-------|
| NM_004314 | ART1      | -0.37 | NM_004131    | GZMB      | -0.37 |
| NM_006304 | SHFM1     | -0.37 | NM_000053    | ATP7B     | -0.37 |
| NM_020242 | KNSL7     | -0.37 | NM_016224    | SNX9      | -0.37 |
| NM_002184 | IL6ST     | -0.37 | NM_020996    | FGF6      | -0.37 |
| NM_000525 | KCNJ11    | -0.37 | NM_024649    | BBS1      | -0.37 |
| NM_025237 | SOST      | -0.37 | NM_012305    | AP2A2     | -0.37 |
| NM_001129 | AEBP1     | -0.37 | NM_001450    | FHL2      | -0.37 |
| NM_004177 | STX3A     | -0.37 | NM_003563    | SPOP      | -0.37 |
| NM_004279 | PMPCB     | -0.37 | NM_003770    | KRTHA7    | -0.37 |
| NM_003781 | B3GALT3   | -0.37 | NM_006554    | MTX2      | -0.37 |
| NM_015043 | KIAA0676  | -0.37 | XM_051197    | KIAA1005  | -0.37 |
| NM_015692 | CPAMD8    | -0.37 | NM_015955    | C2ORF4    | -0.37 |
| NM_015891 | CDC40     | -0.37 | NM_015378    | VPS13D    | -0.37 |
| NM_020447 | C15ORF17  | -0.37 | NM_022067    | C14ORF133 | -0.37 |
| NM_024509 | LRFN3     | -0.37 | NM_024545    | SAP130    | -0.37 |
| NM_032752 | ZNF496    | -0.37 | NM_032918    | RERG      | -0.37 |
| NM_058163 | DT1P1A10  | -0.37 | NM_144570    | C16ORF34  | -0.37 |
| NM_030649 | CENTB5    | -0.37 | NM_133493    | CD109     | -0.37 |
| NM_182758 | FLJ38736  | -0.37 | XM_374078    | LOC285548 | -0.37 |
| XM_372257 | UBE2NL    | -0.37 | XM_379100    | LOC400958 | -0.37 |
| XM_379190 | LOC401062 | -0.37 | XM_373298    | LOC392347 | -0.37 |
| XM_372348 | LOC390037 | -0.37 | NM_001004304 | LOC283337 | -0.37 |
| XM_378620 | LOC400550 | -0.37 | XM_378957    | LOC400832 | -0.37 |
| NM_024046 | MGC8407   | -0.36 | NM_021970    | MAP2K1IP1 | -0.36 |
| XM_292627 | OR4D1     | -0.36 | NM_138465    | GLI4      | -0.36 |
| NM_005193 | CDX4      | -0.36 | NM_134442    | CREB1     | -0.36 |
| NM_001268 | CHC1L     | -0.36 | NM_018975    | TERF2IP   | -0.36 |
| XM_034274 | MYBL1     | -0.36 | NM_004376    | COX15     | -0.36 |
| NM_001917 | DAO       | -0.36 | NM_006731    | FCMD      | -0.36 |
| NM_016594 | FKBP11    | -0.36 | NM_000940    | PON3      | -0.36 |
| NM_001922 | DCT       | -0.36 | NM_015884    | MBTPS2    | -0.36 |
| NM_033506 | FBXO24    | -0.36 | NM_004687    | MTMR4     | -0.36 |
| NM_012284 | KCNH3     | -0.36 | NM_017416    | IL1RAPL2  | -0.36 |
| NM_001065 | TNFRSF1A  | -0.36 | NM_001880    | ATF2      | -0.36 |
| NM_014750 | DLG7      | -0.36 | NM_013260    | HCNGP     | -0.36 |
| NM_004878 | PTGES     | -0.36 | NM_020485    | RHCE      | -0.36 |
| NM_173711 | MTND4     | -0.36 | NM_002935    | RNASE3    | -0.36 |
| NM_006674 | HCP5      | -0.36 | NM_007259    | VPS45A    | -0.36 |
| XM_044580 | KIAA1024  | -0.36 | NM_015449    | NICE-3    | -0.36 |
| NM_015667 | C9ORF36   | -0.36 | NM_016022    | APH-1A    | -0.36 |
| NM_015852 | H-PLK     | -0.36 | NM_015937    | PIGT      | -0.36 |
| XM_052597 | USP53     | -0.36 | NM_018993    | RIN2      | -0.36 |
| XM_032997 | MICAL3    | -0.36 | NM_020796    | SEMA6A    | -0.36 |
| NM_020801 | ARRDC3    | -0.36 | NM_022453    | RNF25     | -0.36 |
| NM_024106 | ZNF426    | -0.36 | NM_025231    | ZNF435    | -0.36 |
| AK023591  | C9ORF13   | -0.36 | NM_173472    | MGC40179  | -0.36 |

|           |           |       |           |              |       |
|-----------|-----------|-------|-----------|--------------|-------|
| NM_152348 | FLJ33817  | -0.36 | NM_144613 | COXVIB2      | -0.36 |
| NM_172069 | KIAA2028  | -0.36 | NM_144618 | MGC29891     | -0.36 |
| NM_203394 | E2F7      | -0.36 | XM_378388 | LOC144742    | -0.36 |
| XM_066946 | LOC139886 | -0.36 | NM_201453 | LOC220869    | -0.36 |
| NM_152675 | FLJ23754  | -0.36 | NM_176886 | TAS2R45      | -0.36 |
| XM_290948 | LOC343071 | -0.36 | NM_207467 | FLJ35530     | -0.36 |
| XM_293633 | LOC344892 | -0.36 | XM_373981 | LOC388942    | -0.36 |
| XM_378200 | LOC399706 | -0.36 | XM_373545 | LOC387883    | -0.36 |
| XM_372472 | LOC390349 | -0.36 | XM_372556 | LOC390551    | -0.36 |
| XM_372190 | LOC389832 | -0.36 | NM_052947 | HAK          | -0.35 |
| NM_000706 | AVPR1A    | -0.35 | NM_175886 | PRPS1L1      | -0.35 |
| NM_014226 | RAGE      | -0.35 | NM_018931 | PCDHB11      | -0.35 |
| NM_021570 | BARX1     | -0.35 | NM_021830 | PEO1         | -0.35 |
| NM_019034 | RHOF      | -0.35 | NM_003369 | UVRAG        | -0.35 |
| NM_004771 | MMP20     | -0.35 | NM_015320 | ARHGEF4      | -0.35 |
| NM_001429 | EP300     | -0.35 | NM_019111 | HLA-DRA      | -0.35 |
| NM_003391 | WNT2      | -0.35 | NM_001628 | AKR1B1       | -0.35 |
| NM_004621 | TRPC6     | -0.35 | NM_012301 | AIP1         | -0.35 |
| NM_000560 | CD53      | -0.35 | NM_004956 | ETV1         | -0.35 |
| XM_039515 | G2        | -0.35 | NM_000818 | GAD2         | -0.35 |
| NM_006784 | WDR3      | -0.35 | NM_004927 | MRPL49       | -0.35 |
| NM_003361 | UMOD      | -0.35 | NM_004271 | LY86         | -0.35 |
| NM_005730 | CTDSP2    | -0.35 | NM_006047 | RBM12        | -0.35 |
| NM_006795 | EHD1      | -0.35 | NM_014445 | SERP1        | -0.35 |
| NM_012384 | GMEB2     | -0.35 | NM_144991 | C21ORF29     | -0.35 |
| NM_019015 | CSGLCA-T  | -0.35 | NM_017881 | C9ORF95      | -0.35 |
| NM_018471 | LEREPO4   | -0.35 | NM_020844 | KIAA1456     | -0.35 |
| NM_021806 | FAM3A     | -0.35 | XM_352894 | DNCH2        | -0.35 |
| NM_024637 | GAL3ST4   | -0.35 | NM_025230 | WDR23        | -0.35 |
| NM_031301 | PSFL      | -0.35 | XM_086186 | FLJ13815     | -0.35 |
| NM_032033 | FKSG43    | -0.35 | NM_032291 | DKFZP761D221 | -0.35 |
| NM_032811 | TBRG1     | -0.35 | NM_032840 | FLJ14800     | -0.35 |
| NM_152266 | MGC32020  | -0.35 | NM_153342 | FLJ90024     | -0.35 |
| XM_378546 | LOC145820 | -0.35 | XM_167149 | C6ORF194     | -0.35 |
| NM_173583 | FLJ33790  | -0.35 | NM_178539 | TAFA2        | -0.35 |
| NM_199346 | PFN4      | -0.35 | XM_374082 | LOC389212    | -0.35 |
| XM_374218 | LOC389506 | -0.35 | XM_374133 | LOC389318    | -0.35 |
| XM_376555 | LOC401286 | -0.35 | XM_376866 | LOC401524    | -0.35 |
| XM_372429 | LOC390245 | -0.35 | XM_377476 | LOC401884    | -0.35 |
| XM_375284 | LOC400481 | -0.35 | XM_371423 | LOC388846    | -0.35 |
| NM_002741 | PRKCL1    | -0.34 | NM_006293 | TYRO3        | -0.34 |
| NM_005288 | GPR12     | -0.34 | NM_004779 | CNOT8        | -0.34 |
| NM_014368 | LHX6      | -0.34 | NM_005359 | SMAD4        | -0.34 |
| NM_138430 | ADPRHL1   | -0.34 | NM_000784 | CYP27A1      | -0.34 |
| NM_033453 | ITPA      | -0.34 | NM_030957 | ADAMTS10     | -0.34 |
| NM_016316 | REV1L     | -0.34 | NM_000052 | ATP7A        | -0.34 |

|           |            |       |           |           |       |
|-----------|------------|-------|-----------|-----------|-------|
| NM_012158 | FBXL3A     | -0.34 | NM_001480 | GALR1     | -0.34 |
| NM_001835 | CLTCL1     | -0.34 | NM_014906 | PPM1E     | -0.34 |
| NM_147130 | NCR3       | -0.34 | NM_002170 | IFNA8     | -0.34 |
| NM_000813 | GABRB2     | -0.34 | NM_002508 | NID       | -0.34 |
| NM_005497 | GJA7       | -0.34 | NM_012129 | CLDN12    | -0.34 |
| NM_000349 | STAR       | -0.34 | NM_019590 | KIAA1217  | -0.34 |
| NM_000726 | CACNB4     | -0.34 | NM_014361 | CNTN5     | -0.34 |
| NM_018960 | GNMT       | -0.34 | NM_006478 | GAS2L1    | -0.34 |
| NM_021070 | LTBP3      | -0.34 | NM_006215 | SERPINA4  | -0.34 |
| NM_016038 | SBDS       | -0.34 | NM_002893 | RBBP7     | -0.34 |
| NM_004539 | NARS       | -0.34 | NM_003176 | SYCP1     | -0.34 |
| NM_006985 | NPIP       | -0.34 | NM_014790 | KIAA0555  | -0.34 |
| NM_005826 | HNRPR      | -0.34 | NM_007015 | LECT1     | -0.34 |
| NM_016383 | HOM-TES-85 | -0.34 | NM_016091 | EIF3S6IP  | -0.34 |
| XM_379021 | C21ORF30   | -0.34 | NM_018145 | FLJ10579  | -0.34 |
| NM_018119 | POLR3E     | -0.34 | NM_018052 | FLJ10305  | -0.34 |
| NM_019118 | RP4-622L5  | -0.34 | NM_021640 | C12ORF10  | -0.34 |
| XM_371398 | MYH7B      | -0.34 | NM_021930 | RINT-1    | -0.34 |
| XM_352951 | MGC11349   | -0.34 | NM_024921 | POF1B     | -0.34 |
| NM_032174 | FLJ12770   | -0.34 | NM_032423 | ZNF528    | -0.34 |
| XM_378183 | MGC5457    | -0.34 | NM_032340 | C6ORF125  | -0.34 |
| NM_173499 | MGC44294   | -0.34 | NM_203374 | LOC147808 | -0.34 |
| NM_138574 | PWWP1      | -0.34 | NM_178126 | LOC162427 | -0.34 |
| NM_182553 | MGC50896   | -0.34 | NM_175735 | LYG2      | -0.34 |
| XM_378431 | LOC283483  | -0.34 | NM_182589 | HTR3E     | -0.34 |
| XM_377506 | EMR4       | -0.34 | XM_290936 | MGC35030  | -0.34 |
| XM_170754 | LOC256394  | -0.34 | XM_293121 | LOC343629 | -0.34 |
| XM_298233 | LOC344709  | -0.34 | XM_172874 | LOC253724 | -0.34 |
| XM_377881 | LOC402204  | -0.34 | XM_376648 | LOC401387 | -0.34 |
| XM_376809 | LOC401485  | -0.34 | NM_006213 | PHKG1     | -0.33 |
| NM_012377 | OR7C2      | -0.33 | NM_013308 | H963      | -0.33 |
| NM_177551 | GPR109A    | -0.33 | NM_033297 | NALP12    | -0.33 |
| NM_003919 | SGCE       | -0.33 | NM_005438 | FOSL1     | -0.33 |
| NM_004503 | HOXC6      | -0.33 | NM_012406 | PRDM4     | -0.33 |
| NM_002599 | PDE2A      | -0.33 | NM_002153 | HSD17B2   | -0.33 |
| NM_001749 | CAPNS1     | -0.33 | NM_002911 | RENT1     | -0.33 |
| NM_006221 | PIN1       | -0.33 | NM_002425 | MMP10     | -0.33 |
| NM_006793 | PRDX3      | -0.33 | NM_002981 | CCL1      | -0.33 |
| NM_003268 | TLR5       | -0.33 | NM_002059 | GH2       | -0.33 |
| NM_001171 | ABCC6      | -0.33 | NM_000065 | C6        | -0.33 |
| NM_012141 | DDX26      | -0.33 | XM_496318 | DMWD      | -0.33 |
| NM_032213 | RBM29      | -0.33 | NM_002269 | KPNA5     | -0.33 |
| NM_005411 | SFTPA1     | -0.33 | NM_004037 | AMPD2     | -0.33 |
| NM_004378 | CRABP1     | -0.33 | NM_001890 | CSN1S1    | -0.33 |
| XM_372810 | PLXNA2     | -0.33 | NM_017419 | ACCN5     | -0.33 |
| NM_030754 | SAA2       | -0.33 | NM_007152 | ZNF195    | -0.33 |

|              |               |       |           |           |       |
|--------------|---------------|-------|-----------|-----------|-------|
| NM_006295    | VAR52         | -0.33 | NM_006685 | PROL3     | -0.33 |
| NM_015400    | DKFZP586N0721 | -0.33 | NM_016492 | RANGNRF   | -0.33 |
| NM_015974    | CRYL1         | -0.33 | NM_016013 | NDUFAF1   | -0.33 |
| NM_016028    | SUV420H1      | -0.33 | NM_016642 | SPTBN5    | -0.33 |
| NM_018424    | EPB41L4B      | -0.33 | NM_017909 | C6ORF96   | -0.33 |
| NM_017680    | ASPN          | -0.33 | NM_017706 | FLJ20195  | -0.33 |
| NM_017797    | BTBD2         | -0.33 | NM_019593 | KIAA1434  | -0.33 |
| NM_020457    | THAP11        | -0.33 | NM_024775 | GEMIN6    | -0.33 |
| XM_370575    | FBXL15        | -0.33 | NM_030579 | CYB5-M    | -0.33 |
| NM_025076    | UXS1          | -0.33 | NM_030927 | DC-TM4F2  | -0.33 |
| NM_032710    | MGC13053      | -0.33 | NM_153750 | C21ORF81  | -0.33 |
| NM_145345    | SOC           | -0.33 | NM_058164 | OLFM2     | -0.33 |
| NM_052863    | SCGB3A1       | -0.33 | NM_133456 | APXL2     | -0.33 |
| NM_144683    | MGC23280      | -0.33 | NM_024944 | CHODL     | -0.33 |
| NM_152717    | MGC35295      | -0.33 | NM_198472 | C10ORF125 | -0.33 |
| NM_173082    | SHPRH         | -0.33 | NM_173829 | FLJ36754  | -0.33 |
| XM_374860    | TP53I5        | -0.33 | NM_205855 | UNQ1940   | -0.33 |
| NM_005128    | C21ORF5       | -0.33 | XM_117408 | LOC202546 | -0.33 |
| XM_209920    | LOC286157     | -0.33 | XM_371504 | LOC388965 | -0.33 |
| XM_372328    | LOC390006     | -0.33 | XM_371018 | LOC388337 | -0.33 |
| NM_001004355 | FLJ31132      | -0.33 | NM_054111 | IHPK3     | -0.32 |
| NM_014916    | LMTK2         | -0.32 | NM_001295 | CCR1      | -0.32 |
| NM_000132    | F8            | -0.32 | NM_000439 | PCSK1     | -0.32 |
| NM_007260    | LYPLA2        | -0.32 | NM_000375 | UROS      | -0.32 |
| NM_133638    | ADAMTS19      | -0.32 | NM_015941 | ATP6V1H   | -0.32 |
| NM_001526    | HCRTR2        | -0.32 | NM_002985 | CCL5      | -0.32 |
| NM_000632    | ITGAM         | -0.32 | NM_000806 | GABRA1    | -0.32 |
| NM_016187    | BIN2          | -0.32 | NM_004113 | FGF12     | -0.32 |
| NM_003036    | SKI           | -0.32 | NM_023009 | MLP       | -0.32 |
| NM_015480    | PVRL3         | -0.32 | NM_139166 | STARS     | -0.32 |
| NM_004363    | CEACAM5       | -0.32 | NM_004132 | HABP2     | -0.32 |
| NM_002794    | PSMB2         | -0.32 | NM_001028 | RPS25     | -0.32 |
| NM_003086    | SNAPC4        | -0.32 | NM_003710 | SPINT1    | -0.32 |
| NM_003693    | SCARF1        | -0.32 | XM_031102 | WDR22     | -0.32 |
| NM_032635    | NIFIE14       | -0.32 | NM_006617 | NES       | -0.32 |
| NM_007229    | PACSIN2       | -0.32 | NM_203459 | KIAA1078  | -0.32 |
| NM_014961    | RIPX          | -0.32 | NM_013370 | OKL38     | -0.32 |
| NM_015958    | CGI-30        | -0.32 | NM_017898 | FLJ20605  | -0.32 |
| NM_017615    | C10ORF86      | -0.32 | NM_018169 | FLJ10652  | -0.32 |
| NM_017640    | LRRC16        | -0.32 | NM_018304 | FLJ11029  | -0.32 |
| NM_020203    | MEPE          | -0.32 | XM_370738 | CHD8      | -0.32 |
| NM_021259    | TMEM8         | -0.32 | NM_022358 | KCNK15    | -0.32 |
| NM_022485    | FLJ22405      | -0.32 | NM_032015 | RNF26     | -0.32 |
| NM_030639    | KIAA1701      | -0.32 | NM_138444 | KCTD12    | -0.32 |
| XM_037817    | FLJ31033      | -0.32 | NM_152267 | FLJ38628  | -0.32 |
| NM_174897    | BPIL3         | -0.32 | NM_153019 | TMPRSS6   | -0.32 |

|            |           |       |              |                |       |
|------------|-----------|-------|--------------|----------------|-------|
| NM_207347  | C18ORF30  | -0.32 | XM_379280    | LOC285422      | -0.32 |
| NM_174978  | C14ORF39  | -0.32 | NM_007137    | ZNF81          | -0.32 |
| XM_063336  | LOC122867 | -0.32 | XM_292824    | LOC342969      | -0.32 |
| XM_372822  | LOC391191 | -0.32 | XM_371621    | LOC389099      | -0.32 |
| XM_374021  | LOC389067 | -0.32 | XM_375410    | LOC400574      | -0.32 |
| XM_373906  | LOC388786 | -0.32 | NM_001004311 | FIGLA          | -0.32 |
| XM_373964  | LOC388910 | -0.32 | XM_032491    | IKBKB          | -0.31 |
| NM_002138  | HNRPD     | -0.31 | NM_005221    | DLX5           | -0.31 |
| NM_0055633 | SOS1      | -0.31 | NM_014009    | FOXP3          | -0.31 |
| NM_000665  | ACHE      | -0.31 | NM_001428    | ENO1           | -0.31 |
| NM_002719  | PPP2R5C   | -0.31 | NM_016509    | CLEC2          | -0.31 |
| NM_014288  | ITGB3BP   | -0.31 | NM_003476    | CSRP3          | -0.31 |
| XM_371755  | RGNEF     | -0.31 | NM_003595    | TPST2          | -0.31 |
| NM_003612  | SEMA7A    | -0.31 | XM_496278    | ZNF516         | -0.31 |
| NM_006358  | SLC25A17  | -0.31 | NM_032102    | SRP46          | -0.31 |
| NM_007187  | WBP4      | -0.31 | NM_014182    | ORMDL2         | -0.31 |
| NM_013271  | PCSK1N    | -0.31 | NM_015993    | TM4SF11        | -0.31 |
| NM_016222  | DDX41     | -0.31 | NM_019045    | DKFZP686L20145 | -0.31 |
| NM_019058  | DDIT4     | -0.31 | NM_017681    | FLJ20130       | -0.31 |
| NM_018035  | FLJ10241  | -0.31 | NM_018121    | C10ORF6        | -0.31 |
| NM_020179  | FN5       | -0.31 | NM_020441    | CORO1B         | -0.31 |
| XM_290768  | C17ORF27  | -0.31 | NM_022916    | VPS33A         | -0.31 |
| NM_032115  | KCNK16    | -0.31 | NM_032391    | PRAC           | -0.31 |
| NM_178122  | LOC90529  | -0.31 | NM_138362    | LOC90736       | -0.31 |
| NM_053016  | PALM2     | -0.31 | NM_138784    | LOC116123      | -0.31 |
| NM_024514  | CYP2R1    | -0.31 | NM_130847    | AMOTL1         | -0.31 |
| NM_181645  | FLJ25393  | -0.31 | NM_153370    | PI16           | -0.31 |
| XM_166184  | SLC37A2   | -0.31 | NM_182539    | MGC33600       | -0.31 |
| NM_153331  | KCTD6     | -0.31 | NM_173668    | C5ORF17        | -0.31 |
| NM_213605  | ZNF517    | -0.31 | XM_376665    | LOC286009      | -0.31 |
| NM_206886  | NY-SAR-41 | -0.31 | NM_001001852 | PIM3           | -0.31 |
| XM_211009  | LOC283389 | -0.31 | XM_166776    | LOC219869      | -0.31 |
| XM_378840  | LOC400740 | -0.31 | XM_374064    | LOC389182      | -0.31 |
| XM_379638  | LOC401518 | -0.31 | XM_372452    | LOC390299      | -0.31 |
| NM_005356  | LCK       | -0.3  | NM_020400    | GPR92          | -0.3  |
| NM_002531  | NTSR1     | -0.3  | NM_016280    | CES4           | -0.3  |
| NM_006593  | TBR1      | -0.3  | NM_004390    | CTSH           | -0.3  |
| NM_014762  | DHCR24    | -0.3  | NM_000181    | GUSB           | -0.3  |
| NM_002768  | PCOLN3    | -0.3  | NM_000414    | HSD17B4        | -0.3  |
| NM_002708  | PPP1CA    | -0.3  | NM_002830    | PTPN4          | -0.3  |
| NM_016941  | DLL3      | -0.3  | NM_031889    | ENAM           | -0.3  |
| NM_012448  | STAT5B    | -0.3  | NM_003062    | SLIT3          | -0.3  |
| NM_021098  | CACNA1H   | -0.3  | NM_018645    | HES6           | -0.3  |
| BC050399   | RFNG      | -0.3  | NM_004585    | RARRES3        | -0.3  |
| NM_015696  | GPX7      | -0.3  | NM_021983    | HLA-DRB4       | -0.3  |
| NM_012332  | ACATE2    | -0.3  | NM_173511    | ALS2CR13       | -0.3  |

|           |           |       |           |              |       |
|-----------|-----------|-------|-----------|--------------|-------|
| NM_003491 | ARD1      | -0.3  | NM_003679 | KMO          | -0.3  |
| NM_003890 | FCGBP     | -0.3  | NM_014859 | KIAA0672     | -0.3  |
| NM_014874 | MFN2      | -0.3  | NM_007180 | TREH         | -0.3  |
| XM_044632 | KIAA0556  | -0.3  | XM_290944 | PLEKHM2      | -0.3  |
| NM_015321 | MECT1     | -0.3  | NM_013262 | MYLIP        | -0.3  |
| XM_375337 | FBXL19    | -0.3  | NM_017953 | FLJ20729     | -0.3  |
| NM_018042 | FLJ10260  | -0.3  | NM_017609 | C10ORF92     | -0.3  |
| NM_018088 | FLJ10408  | -0.3  | NM_017958 | PLEKHB2      | -0.3  |
| NM_018306 | FLJ11036  | -0.3  | NM_021225 | PROL1        | -0.3  |
| XM_030665 | KIAA1229  | -0.3  | NM_022767 | FLJ12484     | -0.3  |
| NM_024028 | MGC3265   | -0.3  | NM_025125 | C10ORF57     | -0.3  |
| NM_024910 | FLJ12700  | -0.3  | NM_032900 | ARHGAP19     | -0.3  |
| NM_080861 | SSB3      | -0.3  | NM_173463 | DKFZP761B107 | -0.3  |
| NM_052933 | TSGA13    | -0.3  | NM_138788 | LOC120224    | -0.3  |
| NM_153016 | FLJ30672  | -0.3  | NM_173542 | LOC196463    | -0.3  |
| NM_153451 | ORAOV1    | -0.3  | NM_172368 | G30          | -0.3  |
| XM_211291 | LOC283994 | -0.3  | XM_371505 | LOC388968    | -0.3  |
| NM_207388 | FLJ31222  | -0.3  | NM_206894 | MGC62100     | -0.3  |
| NM_198573 | UNQ470    | -0.3  | XM_292958 | LOC344167    | -0.3  |
| XM_096883 | LOC145846 | -0.3  | XM_085200 | LOC145660    | -0.3  |
| XM_379136 | LOC401006 | -0.3  | XM_374093 | LOC389236    | -0.3  |
| XM_372118 | FLJ43859  | -0.3  | XM_370570 | LOC387702    | -0.3  |
| NM_213726 | INCA1     | -0.3  | NM_001929 | DGUOK        | -0.29 |
| NM_020185 | DUSP22    | -0.29 | NM_002734 | PRKAR1A      | -0.29 |
| NM_025247 | MGC5601   | -0.29 | NM_021972 | SPHK1        | -0.29 |
| NM_002983 | CCL3      | -0.29 | NM_013940 | OR10H1       | -0.29 |
| NM_004948 | DSC1      | -0.29 | NM_019069 | WDR5B        | -0.29 |
| NM_007276 | CBX3      | -0.29 | NM_006559 | KHDRBS1      | -0.29 |
| NM_003412 | ZIC1      | -0.29 | NM_005996 | TBX3         | -0.29 |
| NM_002905 | RDH5      | -0.29 | NM_003033 | SIAT4A       | -0.29 |
| NM_018319 | TDP1      | -0.29 | NM_003227 | TFR2         | -0.29 |
| NM_052995 | USH3A     | -0.29 | NM_006789 | APOBEC2      | -0.29 |
| NM_002581 | PAPPA     | -0.29 | NM_000465 | BARD1        | -0.29 |
| NM_012283 | KCNG2     | -0.29 | NM_024529 | HRPT2        | -0.29 |
| NM_005851 | DOC-1R    | -0.29 | NM_015855 | WIT-1        | -0.29 |
| NM_005973 | PRCC      | -0.29 | NM_002857 | PEX19        | -0.29 |
| NM_000262 | NAGA      | -0.29 | NM_003971 | SPAG9        | -0.29 |
| XM_043613 | GRID1     | -0.29 | NM_024007 | EBF          | -0.29 |
| NM_001502 | GP2       | -0.29 | NM_002695 | POLR2E       | -0.29 |
| NM_004548 | NDUFB10   | -0.29 | NM_032270 | AD158        | -0.29 |
| NM_006955 | ZNF11B    | -0.29 | NM_017413 | APLN         | -0.29 |
| NM_014647 | LKAP      | -0.29 | NM_004275 | TRFP         | -0.29 |
| NM_006631 | ZNF266    | -0.29 | NM_015305 | KIAA0759     | -0.29 |
| NM_015469 | NIPSNAP3A | -0.29 | NM_014174 | THY28        | -0.29 |
| NM_015971 | MRPS7     | -0.29 | NM_016649 | C20ORF6      | -0.29 |
| XM_291128 | RBM27     | -0.29 | NM_016467 | LOC51240     | -0.29 |

|              |               |       |              |               |       |
|--------------|---------------|-------|--------------|---------------|-------|
| NM_017737    | TOCA1         | -0.29 | NM_017679    | BCAS3         | -0.29 |
| NM_018387    | STRBP         | -0.29 | XM_049078    | KIAA1239      | -0.29 |
| NM_021934    | FLJ11773      | -0.29 | NM_023930    | KCTD14        | -0.29 |
| NM_022826    | 39142         | -0.29 | NM_031959    | KRTAP3-2      | -0.29 |
| NM_138966    | NETO1         | -0.29 | NM_031288    | HMGA1L4       | -0.29 |
| NM_033104    | STN2          | -0.29 | NM_152337    | FLJ32702      | -0.29 |
| NM_175053    | K6IRS4        | -0.29 | NM_033207    | TMEM10        | -0.29 |
| NM_033198    | PIGS          | -0.29 | NM_173487    | LOC132321     | -0.29 |
| NM_173849    | GSC           | -0.29 | XM_051271    | FAM10A6       | -0.29 |
| NM_153773    | C21ORF99      | -0.29 | NM_153234    | C5ORF11       | -0.29 |
| NM_152715    | MGC10233      | -0.29 | XM_114973    | LOC203806     | -0.29 |
| NM_170746    | C11ORF31      | -0.29 | NM_181616    | KRTAP20-2     | -0.29 |
| NM_207411    | UNQ2754       | -0.29 | XM_172917    | LOC256453     | -0.29 |
| XM_212013    | LOC285777     | -0.29 | XM_373848    | LOC388641     | -0.29 |
| XM_378897    | LOC400781     | -0.29 | XM_374301    | LOC389778     | -0.29 |
| XM_373444    | LOC387630     | -0.29 | XM_378706    | LOC400621     | -0.29 |
| XM_380022    | LOC402679     | -0.29 | NM_001006116 | C21ORF49      | -0.29 |
| NM_001006117 | RBMV1J        | -0.29 | NM_004327    | BCR           | -0.28 |
| NM_017506    | OR7A5         | -0.28 | NM_022788    | P2RY12        | -0.28 |
| NM_003555    | OR1G1         | -0.28 | NM_012373    | OR3A3         | -0.28 |
| NM_000101    | CYBA          | -0.28 | NM_005963    | MYH1          | -0.28 |
| NM_016307    | PRRX2         | -0.28 | NM_012391    | SPDEF         | -0.28 |
| NM_021251    | CAPN10        | -0.28 | NM_004716    | PCSK7         | -0.28 |
| NM_024420    | PLA2G4A       | -0.28 | NM_016238    | ANAPC7        | -0.28 |
| NM_022076    | DUSP21        | -0.28 | NM_021976    | RXRB          | -0.28 |
| NM_006179    | NTF5          | -0.28 | NM_139075    | TPCN2         | -0.28 |
| NM_003666    | BLZF1         | -0.28 | NM_004930    | CAPZB         | -0.28 |
| NM_016511    | CLEC1         | -0.28 | NM_004484    | GPC3          | -0.28 |
| NM_000122    | ERCC3         | -0.28 | NM_002168    | IDH2          | -0.28 |
| NM_016234    | ACSL5         | -0.28 | NM_006953    | UPK3A         | -0.28 |
| NM_007084    | SOX21         | -0.28 | XM_038920    | N4BP3         | -0.28 |
| NM_015374    | UNC84B        | -0.28 | NM_152257    | KIAA0889      | -0.28 |
| NM_015424    | CHRDLD        | -0.28 | NM_016955    | SLALP         | -0.28 |
| NM_016058    | CGI-121       | -0.28 | NM_019053    | SEC15L1       | -0.28 |
| NM_053004    | GNB1L         | -0.28 | NM_017676    | FLJ20125      | -0.28 |
| NM_018390    | FLJ11323      | -0.28 | NM_018074    | FLJ10374      | -0.28 |
| NM_020177    | FEM1C         | -0.28 | NM_018698    | NXT2          | -0.28 |
| NM_020659    | TTYH1         | -0.28 | XM_371279    | KIAA1163      | -0.28 |
| NM_021626    | SCPEP1        | -0.28 | NM_021812    | BPESC1        | -0.28 |
| NM_020749    | MTUS1         | -0.28 | NM_022063    | C10ORF84      | -0.28 |
| NM_022913    | DKFZP761C169  | -0.28 | NM_022828    | YTHDC2        | -0.28 |
| NM_024027    | COLEC11       | -0.28 | NM_024560    | FLJ21963      | -0.28 |
| NM_032138    | KBTBD7        | -0.28 | NM_194327    | GALIG         | -0.28 |
| NM_030954    | DKFZP564A022  | -0.28 | NM_031468    | CALN1         | -0.28 |
| NM_138418    | MGC15416      | -0.28 | NM_018718    | TSGA14        | -0.28 |
| XM_043624    | DKFZP434E1822 | -0.28 | XM_043863    | DKFZP434H2226 | -0.28 |



|           |           |       |              |           |       |
|-----------|-----------|-------|--------------|-----------|-------|
| NM_031908 | C1QTNF2   | -0.28 | XM_378250    | LOC92482  | -0.28 |
| XM_376284 | LOC93556  | -0.28 | XM_058720    | KIAA1971  | -0.28 |
| XM_376372 | LOC134121 | -0.28 | NM_144617    | HSPB6     | -0.28 |
| NM_145205 | LOC127540 | -0.28 | NM_145265    | LOC133957 | -0.28 |
| NM_144682 | FLJ31952  | -0.28 | NM_153290    | FAM10A4   | -0.28 |
| NM_153454 | C21ORF86  | -0.28 | NM_173584    | MGC45840  | -0.28 |
| NM_198080 | LOC253827 | -0.28 | NM_152757    | FLJ30313  | -0.28 |
| XM_378971 | LOC284798 | -0.28 | NM_181489    | ZNF445    | -0.28 |
| NM_198580 | SLC27A1   | -0.28 | NM_207451    | FLJ45121  | -0.28 |
| NM_207462 | FLJ45684  | -0.28 | XM_068121    | LOC132969 | -0.28 |
| XM_295166 | LOC340148 | -0.28 | XM_371331    | LOC388722 | -0.28 |
| XM_374653 | LOC392993 | -0.28 | XM_374315    | LOC389815 | -0.28 |
| XM_378215 | LOC399726 | -0.28 | NM_001005235 | OR1L4     | -0.28 |
| XM_372272 | LOC389905 | -0.28 | XM_379881    | LOC402559 | -0.28 |
| NM_000154 | GALK1     | -0.27 | NM_014215    | INSRR     | -0.27 |
| NM_005904 | SMAD7     | -0.27 | NM_014720    | SLK       | -0.27 |
| NM_017872 | ICF45     | -0.27 | NM_152779    | MGC26856  | -0.27 |
| NM_001050 | SSTR2     | -0.27 | NM_022105    | DATF1     | -0.27 |
| NM_004671 | PIAS2     | -0.27 | NM_005937    | MLLT6     | -0.27 |
| NM_006777 | ZBTB33    | -0.27 | NM_002167    | ID3       | -0.27 |
| NM_012231 | PRDM2     | -0.27 | NM_003709    | KLF7      | -0.27 |
| NM_004346 | CASP3     | -0.27 | NM_001535    | HRMT1L1   | -0.27 |
| NM_001047 | SRD5A1    | -0.27 | NM_006398    | UBD       | -0.27 |
| NM_022349 | MS4A6A    | -0.27 | NM_005505    | SCARB1    | -0.27 |
| NM_004185 | WNT2B     | -0.27 | NM_002206    | ITGA7     | -0.27 |
| NM_001138 | AGRP      | -0.27 | NM_001521    | GTF3C2    | -0.27 |
| NM_014665 | LRRC14    | -0.27 | NM_014389    | PELP1     | -0.27 |
| NM_178460 | PTPNS1L2  | -0.27 | NM_021117    | CRY2      | -0.27 |
| NM_004944 | DNASE1L3  | -0.27 | NM_004524    | LLGL2     | -0.27 |
| NM_002642 | PIGC      | -0.27 | NM_006749    | SLC20A2   | -0.27 |
| NM_004858 | SLC4A8    | -0.27 | NM_005844    | HCG9      | -0.27 |
| NM_006331 | C2F       | -0.27 | NM_007034    | DNAJB4    | -0.27 |
| NM_007281 | SCRG1     | -0.27 | NM_015425    | POLR1A    | -0.27 |
| NM_014018 | MRPS28    | -0.27 | NM_014188    | HSPC182   | -0.27 |
| NM_019073 | SPATA6    | -0.27 | NM_016226    | VPS29     | -0.27 |
| NM_017833 | C21ORF55  | -0.27 | NM_018353    | C14ORF106 | -0.27 |
| NM_018212 | ENAH      | -0.27 | NM_018836    | SHREW1    | -0.27 |
| XM_051862 | LOC58489  | -0.27 | NM_024602    | FLJ21156  | -0.27 |
| NM_030641 | APOL6     | -0.27 | NM_025099    | FLJ22170  | -0.27 |
| NM_030958 | SLCO5A1   | -0.27 | XM_290496    | DIXDC1    | -0.27 |
| XM_030892 | ZNF616    | -0.27 | XM_036115    | ZC3HDC5   | -0.27 |
| NM_174889 | LOC91942  | -0.27 | NM_133371    | MYOZ3     | -0.27 |
| NM_052971 | LEAP-2    | -0.27 | NM_145248    | LOC122258 | -0.27 |
| NM_080831 | DEFB129   | -0.27 | NM_052909    | KIAA1909  | -0.27 |
| NM_153239 | KIAA1924  | -0.27 | NM_153023    | SPATA13   | -0.27 |
| XM_291007 | LOC339766 | -0.27 | NM_178130    | TXNDC6    | -0.27 |

|              |           |       |              |           |       |
|--------------|-----------|-------|--------------|-----------|-------|
| XM_208658    | LOC283398 | -0.27 | XM_291697    | LOC340745 | -0.27 |
| XM_166720    | LOC220998 | -0.27 | XM_379106    | LOC400964 | -0.27 |
| XM_373043    | LOC391723 | -0.27 | XM_374268    | LOC389656 | -0.27 |
| XM_374428    | LOC392661 | -0.27 | XM_375609    | LOC400693 | -0.27 |
| XM_375560    | LOC400673 | -0.27 | NM_001001915 | OR2G2     | -0.27 |
| NM_001006608 | STGC3     | -0.27 | NM_001826    | CKS1B     | -0.26 |
| NM_018653    | GPRC5C    | -0.26 | NM_030643    | APOL4     | -0.26 |
| NM_004096    | EIF4EBP2  | -0.26 | NM_004385    | CSPG2     | -0.26 |
| NM_006561    | CUGBP2    | -0.26 | NM_003379    | VIL2      | -0.26 |
| NM_006747    | SIPA1     | -0.26 | NM_005253    | FOSL2     | -0.26 |
| NM_002729    | HHEX      | -0.26 | NM_006437    | ADPRTL1   | -0.26 |
| NM_020361    | CPA6      | -0.26 | NM_001905    | CTPS      | -0.26 |
| NM_003748    | ALDH4A1   | -0.26 | NM_003793    | CTSF      | -0.26 |
| NM_021044    | DHH       | -0.26 | NM_001125    | ADPRH     | -0.26 |
| NM_004181    | UCHL1     | -0.26 | NM_012072    | C1QR1     | -0.26 |
| NM_004123    | GIP       | -0.26 | NM_019113    | FGF21     | -0.26 |
| NM_005142    | GIF       | -0.26 | NM_004978    | KCNC4     | -0.26 |
| NM_005178    | BCL3      | -0.26 | NM_004702    | CCNE2     | -0.26 |
| NM_032818    | C9ORF100  | -0.26 | NM_003471    | KCNAB1    | -0.26 |
| NM_005779    | LHFPL2    | -0.26 | NM_005905    | SMAD9     | -0.26 |
| NM_016180    | MATP      | -0.26 | NM_012364    | OR1Q1     | -0.26 |
| NM_003955    | SOCS3     | -0.26 | NM_003401    | XRCC4     | -0.26 |
| NM_005395    | PMS2L3    | -0.26 | NM_005988    | SPRR2A    | -0.26 |
| NM_017503    | SURF2     | -0.26 | NM_004699    | DXS9928E  | -0.26 |
| NM_014262    | LEPREL2   | -0.26 | XM_290517    | KIAA0404  | -0.26 |
| XM_039385    | KIAA1093  | -0.26 | NM_015343    | DULLARD   | -0.26 |
| NM_015388    | C6ORF109  | -0.26 | NM_014065    | HT001     | -0.26 |
| NM_013240    | C21ORF127 | -0.26 | NM_018045    | FLJ10276  | -0.26 |
| NM_017921    | NPL4      | -0.26 | XM_038291    | FLJ13456  | -0.26 |
| NM_024578    | FLJ22709  | -0.26 | NM_032784    | THSD2     | -0.26 |
| NM_032448    | KIAA1838  | -0.26 | NM_138402    | LOC93349  | -0.26 |
| NM_145168    | HSPC105   | -0.26 | NM_152314    | MGC34830  | -0.26 |
| NM_174900    | ZFP42     | -0.26 | XM_086826    | LOC150368 | -0.26 |
| NM_138336    | LOC150678 | -0.26 | XM_371263    | MCOLN2    | -0.26 |
| NM_173616    | FLJ35894  | -0.26 | NM_198850    | LOC284345 | -0.26 |
| NM_198493    | FLJ45235  | -0.26 | XM_291485    | LOC343263 | -0.26 |
| XM_211853    | LOC285344 | -0.26 | XM_016532    | LOC220793 | -0.26 |
| XM_098450    | LOC153959 | -0.26 | XM_209910    | LOC286129 | -0.26 |
| XM_372992    | LOC391542 | -0.26 | XM_374070    | LOC389188 | -0.26 |
| XM_372486    | LOC390377 | -0.26 | XM_373672    | LOC388235 | -0.26 |
| XM_373395    | LOC392582 | -0.26 | NM_002513    | NME3      | -0.25 |
| NM_001792    | CDH2      | -0.25 | NM_014424    | HSPB7     | -0.25 |
| NM_013347    | HSU24186  | -0.25 | NM_006608    | PHTF1     | -0.25 |
| NM_006965    | ZNF24     | -0.25 | NM_003429    | ZNF85     | -0.25 |
| NM_015636    | EIF2B4    | -0.25 | NM_000056    | BCKDHB    | -0.25 |
| NM_000128    | F11       | -0.25 | NM_014815    | THRAP4    | -0.25 |

|           |           |       |           |               |       |
|-----------|-----------|-------|-----------|---------------|-------|
| NM_000351 | STS       | -0.25 | NM_016178 | OAZ3          | -0.25 |
| NM_006074 | TRIM22    | -0.25 | NM_007317 | KIF22         | -0.25 |
| NM_006653 | FRS3      | -0.25 | NM_005817 | M6PRBP1       | -0.25 |
| NM_006854 | KDELR2    | -0.25 | NM_007036 | ESM1          | -0.25 |
| NM_005731 | ARPC2     | -0.25 | NM_016370 | RAB9B         | -0.25 |
| NM_000384 | APOB      | -0.25 | NM_001131 | CRISP1        | -0.25 |
| NM_139320 | CHRFAM7A  | -0.25 | NM_000195 | HPS1          | -0.25 |
| NM_015525 | IBTK      | -0.25 | NM_002825 | PTN           | -0.25 |
| NM_001158 | AOC2      | -0.25 | NM_001745 | CAMLG         | -0.25 |
| NM_002159 | HTN1      | -0.25 | NM_004466 | GPC5          | -0.25 |
| NM_002997 | SDC1      | -0.25 | NM_006026 | H1FX          | -0.25 |
| NM_005096 | ZNF261    | -0.25 | XM_376232 | VPRBP         | -0.25 |
| NM_007072 | HHLA2     | -0.25 | NM_006467 | POLR3G        | -0.25 |
| NM_015014 | KIAA0117  | -0.25 | XM_291159 | DKFZP434F011  | -0.25 |
| NM_017421 | COQ3      | -0.25 | NM_017739 | FLJ20277      | -0.25 |
| XM_378191 | PRO2964   | -0.25 | NM_020205 | ZA20D1        | -0.25 |
| XM_371352 | FMN2      | -0.25 | NM_022898 | BCL11B        | -0.25 |
| NM_031939 | MRO       | -0.25 | NM_032214 | SLA2          | -0.25 |
| NM_032549 | IMMP2L    | -0.25 | NM_032136 | DKFZP434L1717 | -0.25 |
| NM_080665 | MGC19604  | -0.25 | NM_138363 | LOC90799      | -0.25 |
| NM_080656 | MGC13017  | -0.25 | NM_145165 | CHURC1        | -0.25 |
| NM_144599 | SPG6      | -0.25 | NM_172000 | HE9           | -0.25 |
| NM_152478 | ZNF583    | -0.25 | XM_379117 | LOC150568     | -0.25 |
| NM_152581 | MOSPD2    | -0.25 | NM_181646 | FLJ32110      | -0.25 |
| NM_145115 | ZNF498    | -0.25 | XM_291816 | OTOG          | -0.25 |
| XM_293398 | RAB41     | -0.25 | NM_207422 | FLJ44635      | -0.25 |
| XM_291645 | LOC343563 | -0.25 | XM_172995 | LOC255809     | -0.25 |
| XM_373822 | LOC388587 | -0.25 | XM_371816 | LOC389384     | -0.25 |
| XM_380112 | LOC402515 | -0.25 | XM_373266 | LOC392275     | -0.25 |
| XM_373540 | LOC387872 | -0.25 | XM_375031 | LOC400145     | -0.25 |
| XM_371192 | LOC388561 | -0.25 | XM_371424 | LOC388847     | -0.25 |
| NM_025195 | TRIB1     | -0.24 | NM_006137 | CD7           | -0.24 |
| NM_005391 | PDK3      | -0.24 | NM_004783 | TAO1          | -0.24 |
| NM_054021 | GPR101    | -0.24 | NM_153444 | OR5P2         | -0.24 |
| NM_001797 | CDH11     | -0.24 | NM_001279 | CIDEA         | -0.24 |
| NM_022161 | BIRC7     | -0.24 | NM_007355 | HSPCB         | -0.24 |
| NM_000893 | KNG1      | -0.24 | NM_015897 | PIAS4         | -0.24 |
| NM_015983 | LOC51619  | -0.24 | NM_024080 | TRPM8         | -0.24 |
| NM_003320 | TUB       | -0.24 | NM_004792 | PPIG          | -0.24 |
| NM_032833 | PPP1R15B  | -0.24 | NM_007066 | PKIG          | -0.24 |
| NM_080744 | SRCRB4D   | -0.24 | NM_031907 | USP26         | -0.24 |
| NM_014489 | FRAG1     | -0.24 | NM_006264 | PTPN13        | -0.24 |
| NM_006273 | CCL7      | -0.24 | NM_001781 | CD69          | -0.24 |
| NM_000109 | DMD       | -0.24 | NM_001205 | BNIP1         | -0.24 |
| NM_016426 | GTSE1     | -0.24 | NM_138387 | G6PC3         | -0.24 |
| NM_005338 | HIP1      | -0.24 | NM_002520 | NPM1          | -0.24 |

|           |           |       |           |           |       |
|-----------|-----------|-------|-----------|-----------|-------|
| NM_006715 | MAN2C1    | -0.24 | NM_007100 | ATP5I     | -0.24 |
| NM_005503 | APBA2     | -0.24 | NM_002705 | PPL       | -0.24 |
| NM_005049 | PWP2H     | -0.24 | NM_004286 | GTPBP1    | -0.24 |
| NM_014171 | CRIP1     | -0.24 | NM_004855 | PIGB      | -0.24 |
| NM_015575 | TNRC15    | -0.24 | NM_013305 | SIAT8E    | -0.24 |
| NM_016301 | MGC14560  | -0.24 | NM_017847 | C10RF27   | -0.24 |
| NM_017861 | FLJ20522  | -0.24 | NM_020665 | TMEM27    | -0.24 |
| XM_039698 | KIAA1432  | -0.24 | NM_022103 | FLJ14011  | -0.24 |
| NM_022787 | NMNAT1    | -0.24 | NM_022486 | SUSD1     | -0.24 |
| NM_024092 | MGC5508   | -0.24 | NM_024648 | FLJ22222  | -0.24 |
| NM_024570 | FLJ11712  | -0.24 | NM_025061 | FLJ23420  | -0.24 |
| NM_025079 | FLJ23231  | -0.24 | XM_371706 | KIAA1109  | -0.24 |
| NM_032032 | FKSG42    | -0.24 | NM_032790 | FLJ14466  | -0.24 |
| NM_033120 | NKD2      | -0.24 | NM_152326 | ANKRD9    | -0.24 |
| NM_182504 | WBSCR28   | -0.24 | NM_153703 | PODN      | -0.24 |
| NM_203495 | COMMD6    | -0.24 | NM_138969 | RDH-E2    | -0.24 |
| NM_145292 | GALNT15   | -0.24 | NM_198461 | FLJ45273  | -0.24 |
| XM_114456 | LOC202181 | -0.24 | XM_291464 | LOC343221 | -0.24 |
| XM_060537 | LOC127550 | -0.24 | XM_209097 | LOC284269 | -0.24 |
| XM_113971 | APM-1     | -0.24 | XM_372827 | LOC391196 | -0.24 |
| XM_375688 | LOC400736 | -0.24 | XM_373843 | LOC388628 | -0.24 |
| XM_372973 | LOC391491 | -0.24 | XM_371622 | LOC389101 | -0.24 |
| XM_377889 | LOC402211 | -0.24 | XM_379417 | LOC401264 | -0.24 |
| XM_371182 | LOC388554 | -0.24 | XM_372261 | LOC389900 | -0.24 |
| NM_005235 | ERBB4     | -0.23 | NM_005233 | EPHA3     | -0.23 |
| NM_000707 | AVPR1B    | -0.23 | NM_000843 | GRM6      | -0.23 |
| NM_000890 | KCNJ5     | -0.23 | NM_001388 | DRG2      | -0.23 |
| NM_014718 | CLSTN3    | -0.23 | NM_000021 | PSEN1     | -0.23 |
| NM_002881 | RALB      | -0.23 | NM_000412 | HRG       | -0.23 |
| NM_006297 | XRCC1     | -0.23 | NM_004309 | ARHGDI1   | -0.23 |
| NM_006602 | TCFL5     | -0.23 | NM_003420 | ZNF35     | -0.23 |
| NM_001545 | ICT1      | -0.23 | NM_139073 | SPATA3    | -0.23 |
| XM_291141 | KIAA0303  | -0.23 | NM_004184 | WARS      | -0.23 |
| NM_005552 | KNS2      | -0.23 | NM_003479 | PTP4A2    | -0.23 |
| NM_001768 | CD8A      | -0.23 | NM_002943 | RORA      | -0.23 |
| NM_005554 | KRT6A     | -0.23 | NM_001856 | COL16A1   | -0.23 |
| NM_000094 | COL7A1    | -0.23 | NM_005900 | SMAD1     | -0.23 |
| NM_015627 | ARH       | -0.23 | NM_005370 | RAB8A     | -0.23 |
| NM_005097 | LGI1      | -0.23 | NM_014485 | PGDS      | -0.23 |
| NM_017705 | MPRG      | -0.23 | XM_039548 | SMYD5     | -0.23 |
| NM_004168 | SDHA      | -0.23 | NM_021727 | FADS3     | -0.23 |
| NM_007168 | ABCA8     | -0.23 | NM_014222 | NDUFA8    | -0.23 |
| NM_015256 | ACSL6     | -0.23 | NM_002638 | PI3       | -0.23 |
| NM_002950 | RPN1      | -0.23 | NM_170750 | PSMD10    | -0.23 |
| NM_006507 | REG1B     | -0.23 | NM_006754 | SYPL      | -0.23 |
| NM_014747 | RIMS3     | -0.23 | NM_005771 | DHRS9     | -0.23 |

|           |           |       |           |           |       |
|-----------|-----------|-------|-----------|-----------|-------|
| NM_015018 | KIAA1117  | -0.23 | NM_015072 | KIAA0998  | -0.23 |
| NM_032109 | OTP       | -0.23 | NM_015604 | WDR21     | -0.23 |
| NM_016490 | LOC51252  | -0.23 | NM_015889 | PCQAP     | -0.23 |
| NM_016578 | HBXAP     | -0.23 | XM_371258 | KIAA1579  | -0.23 |
| NM_018697 | LANCL2    | -0.23 | NM_018926 | PCDHGB6   | -0.23 |
| NM_020682 | CYT19     | -0.23 | NM_020775 | KIAA1324  | -0.23 |
| NM_030613 | FLJ21628  | -0.23 | NM_024491 | BITE      | -0.23 |
| NM_031463 | LOC83693  | -0.23 | NM_031218 | ZNF505    | -0.23 |
| NM_080653 | ATP6V1E2  | -0.23 | XM_290732 | RNF157    | -0.23 |
| NM_152335 | FLJ38190  | -0.23 | NM_139164 | STARD4    | -0.23 |
| XM_059061 | LOC126661 | -0.23 | NM_153449 | SLC2A14   | -0.23 |
| NM_178844 | NOD3      | -0.23 | NM_145018 | FLJ25416  | -0.23 |
| NM_198492 | LSECTIN   | -0.23 | XM_379573 | LOC286135 | -0.23 |
| NM_199351 | C1ORF32   | -0.23 | NM_198524 | TEX9      | -0.23 |
| NM_203309 | MGC48595  | -0.23 | XM_094074 | LOC166752 | -0.23 |
| XM_379181 | LOC401057 | -0.23 | XM_379274 | LOC401151 | -0.23 |
| XM_379325 | LOC401180 | -0.23 | XM_377976 | LOC402301 | -0.23 |
| XM_373638 | LOC388142 | -0.23 | XM_373378 | LOC392559 | -0.23 |
| NM_000616 | CD4       | -0.22 | NM_004156 | PPP2CB    | -0.22 |
| NM_004755 | RPS6KA5   | -0.22 | NM_053278 | TRAR5     | -0.22 |
| NM_005281 | GPR3      | -0.22 | NM_004062 | CDH16     | -0.22 |
| NM_004970 | IGFALS    | -0.22 | NM_005053 | RAD23A    | -0.22 |
| NM_004904 | CREB5     | -0.22 | NM_000321 | RB1       | -0.22 |
| NM_004555 | NFATC3    | -0.22 | NM_016006 | ABHD5     | -0.22 |
| NM_006877 | GMPR      | -0.22 | NM_000521 | HEXB      | -0.22 |
| NM_014578 | RHOD      | -0.22 | NM_002534 | OAS1      | -0.22 |
| NM_003368 | USP1      | -0.22 | NM_013956 | NRG1      | -0.22 |
| NM_003463 | PTP4A1    | -0.22 | NM_001463 | FRZB      | -0.22 |
| NM_000418 | IL4R      | -0.22 | NM_014207 | CD5       | -0.22 |
| NM_002209 | ITGAL     | -0.22 | NM_030759 | NRBF2     | -0.22 |
| NM_002607 | PDGFA     | -0.22 | NM_014624 | S100A6    | -0.22 |
| NM_001852 | COL9A2    | -0.22 | NM_020989 | CRYGC     | -0.22 |
| NM_003039 | SLC2A5    | -0.22 | NM_006029 | PNMA1     | -0.22 |
| NM_005645 | TAF13     | -0.22 | NM_005065 | SEL1L     | -0.22 |
| NM_001676 | ATP12A    | -0.22 | NM_014064 | AD-003    | -0.22 |
| NM_005600 | NIT1      | -0.22 | NM_002899 | RBP1      | -0.22 |
| NM_021977 | SLC22A3   | -0.22 | NM_004683 | RGN       | -0.22 |
| NM_006038 | SPATA2    | -0.22 | NM_006064 | RRAGB     | -0.22 |
| NM_006691 | XLKD1     | -0.22 | XM_039169 | KIAA1276  | -0.22 |
| XM_294533 | OR1J4     | -0.22 | NM_014186 | COMMD9    | -0.22 |
| NM_016153 | LW-1      | -0.22 | NM_017820 | FLJ20433  | -0.22 |
| NM_017786 | FLJ20366  | -0.22 | NM_018360 | CXORF15   | -0.22 |
| NM_020646 | ASCL3     | -0.22 | NM_020824 | ARHGAP21  | -0.22 |
| XM_168578 | MUC3B     | -0.22 | NM_024635 | MAK10     | -0.22 |
| NM_024311 | ET        | -0.22 | NM_032807 | FBXO18    | -0.22 |
| NM_145233 | ZNF625    | -0.22 | NM_033410 | MGC13138  | -0.22 |

|           |           |       |              |           |       |
|-----------|-----------|-------|--------------|-----------|-------|
| NM_033213 | MGC12466  | -0.22 | NM_152333    | SLC25A29  | -0.22 |
| NM_033547 | MGC16733  | -0.22 | NM_173489    | FLJ40243  | -0.22 |
| NM_173505 | ANKRD29   | -0.22 | NM_153040    | FLJ32831  | -0.22 |
| XM_374912 | XRRA1     | -0.22 | NM_194288    | LOC146712 | -0.22 |
| XM_379164 | LOC151171 | -0.22 | NM_173352    | K5B       | -0.22 |
| NM_138337 | MICL      | -0.22 | XM_370696    | FLJ34236  | -0.22 |
| NM_175063 | LOC284361 | -0.22 | NM_207431    | FLJ45950  | -0.22 |
| XM_087490 | LOC152586 | -0.22 | XM_210642    | LOC285697 | -0.22 |
| XM_293380 | LOC347454 | -0.22 | XM_295195    | LOC340267 | -0.22 |
| XM_372815 | LOC391165 | -0.22 | XM_377644    | LOC401993 | -0.22 |
| XM_371647 | LOC389129 | -0.22 | XM_374752    | LOC392791 | -0.22 |
| XM_374295 | LOC389767 | -0.22 | XM_379850    | LOC402524 | -0.22 |
| XM_373463 | LOC387686 | -0.22 | NM_001005497 | OR6C75    | -0.22 |
| NM_212552 | LOC388962 | -0.22 | NM_001203    | BMPR1B    | -0.21 |
| NM_004073 | PLK3      | -0.21 | NM_006314    | CNKSR1    | -0.21 |
| NM_002019 | FLT1      | -0.21 | NM_003137    | SRPK1     | -0.21 |
| NM_000905 | NPY       | -0.21 | NM_012138    | AATF      | -0.21 |
| NM_033108 | HSFY1     | -0.21 | NM_000404    | GLB1      | -0.21 |
| NM_004914 | RAB36     | -0.21 | NM_033341    | BIRC8     | -0.21 |
| NM_022113 | KIF13A    | -0.21 | NM_003853    | IL18RAP   | -0.21 |
| NM_003974 | DOK2      | -0.21 | NM_003153    | STAT6     | -0.21 |
| NM_001645 | APOC1     | -0.21 | NM_020360    | PLSCR3    | -0.21 |
| NM_014764 | DAZAP2    | -0.21 | NM_000509    | FGG       | -0.21 |
| NM_002824 | PTMS      | -0.21 | NM_022743    | SMYD3     | -0.21 |
| NM_020978 | AMY2B     | -0.21 | NM_020474    | GALNT1    | -0.21 |
| NM_018063 | HELLS     | -0.21 | NM_012314    | KIR2DS4   | -0.21 |
| NM_002126 | HLF       | -0.21 | NM_002540    | ODF2      | -0.21 |
| NM_014057 | OGN       | -0.21 | NM_006309    | LRRFIP2   | -0.21 |
| NM_004789 | LHX2      | -0.21 | XM_376578    | PHF14     | -0.21 |
| NM_004853 | STX8      | -0.21 | XM_375685    | KLHL21    | -0.21 |
| NM_013448 | BAZ1A     | -0.21 | NM_015381    | TAFA5     | -0.21 |
| XM_087353 | KIAA0794  | -0.21 | NM_015677    | SH3YL1    | -0.21 |
| NM_013253 | DKK3      | -0.21 | NM_016010    | CGI-62    | -0.21 |
| NM_018024 | FLJ10204  | -0.21 | NM_017969    | FLJ10006  | -0.21 |
| NM_019855 | CABP5     | -0.21 | NM_021187    | CYP4F11   | -0.21 |
| NM_021200 | PLEKHB1   | -0.21 | XM_048362    | KIAA1543  | -0.21 |
| NM_032849 | FLJ14834  | -0.21 | NM_138423    | H63       | -0.21 |
| NM_052860 | ZNF300    | -0.21 | NM_173469    | LOC92912  | -0.21 |
| NM_177452 | TRAPPC6B  | -0.21 | NM_139244    | STXBP5    | -0.21 |
| NM_144642 | SYNPR     | -0.21 | NM_153031    | FLJ32063  | -0.21 |
| NM_174909 | MGC23909  | -0.21 | NM_175908    | LOC284296 | -0.21 |
| XM_378777 | LOC284385 | -0.21 | XM_379230    | LOC339894 | -0.21 |
| NM_182634 | FLJ36166  | -0.21 | NM_207417    | FLJ46082  | -0.21 |
| NM_207494 | FLJ40092  | -0.21 | XM_060887    | LOC128192 | -0.21 |
| XM_068229 | LOC133185 | -0.21 | XM_067369    | LOC131405 | -0.21 |
| XM_374062 | LOC389172 | -0.21 | XM_376756    | LOC401454 | -0.21 |

|           |              |       |           |               |       |
|-----------|--------------|-------|-----------|---------------|-------|
| XM_378090 | LOC402382    | -0.21 | XM_373557 | LOC387901     | -0.21 |
| XM_378365 | LOC400050    | -0.21 | XM_377537 | LOC401922     | -0.21 |
| XM_373744 | LOC388414    | -0.21 | XM_372648 | LOC390748     | -0.21 |
| XM_379030 | LOC400880    | -0.21 | XM_372268 | LOC389904     | -0.21 |
| NM_007313 | ABL1         | -0.2  | NM_004767 | GPR37L1       | -0.2  |
| NM_006759 | UGP2         | -0.2  | NM_033179 | OR51B4        | -0.2  |
| NM_004825 | CDY2         | -0.2  | NM_014292 | CBX6          | -0.2  |
| NM_018938 | PCDHB4       | -0.2  | NM_032335 | PHF6          | -0.2  |
| NM_002970 | SAT          | -0.2  | NM_016525 | UBAP1         | -0.2  |
| NM_004249 | RAB28        | -0.2  | NM_001918 | DBT           | -0.2  |
| NM_015277 | NEDD4L       | -0.2  | NM_004667 | HERC2         | -0.2  |
| NM_033272 | KCNH7        | -0.2  | NM_016363 | GP6           | -0.2  |
| NM_005472 | KCNE3        | -0.2  | NM_007074 | CORO1A        | -0.2  |
| NM_004170 | SLC1A1       | -0.2  | NM_015710 | GLTSCR2       | -0.2  |
| NM_004883 | NRG2         | -0.2  | NM_012425 | RSU1          | -0.2  |
| NM_006069 | MRV11        | -0.2  | NM_002582 | PARN          | -0.2  |
| NM_024411 | PDYN         | -0.2  | NM_021095 | SLC5A6        | -0.2  |
| NM_005460 | SNCAIP       | -0.2  | XM_379798 | KIAA0087      | -0.2  |
| NM_006805 | HNRPA0       | -0.2  | NM_007277 | SEC6L1        | -0.2  |
| NM_015170 | SULF1        | -0.2  | NM_012382 | OSRF          | -0.2  |
| NM_015523 | DKFZP566E144 | -0.2  | NM_015361 | R3HDM         | -0.2  |
| NM_020349 | ANKRD2       | -0.2  | NM_016581 | SITPEC        | -0.2  |
| NM_016475 | C14ORF100    | -0.2  | NM_017723 | FLJ20245      | -0.2  |
| NM_018128 | FLJ10534     | -0.2  | NM_018318 | FLJ11088      | -0.2  |
| NM_020871 | LRCH2        | -0.2  | NM_025203 | FLJ21945      | -0.2  |
| NM_024924 | FLJ12985     | -0.2  | NM_030796 | DKFZP564K0822 | -0.2  |
| XM_372239 | LOC92129     | -0.2  | XM_085175 | TTC7B         | -0.2  |
| XM_379559 | LOC157278    | -0.2  | NM_173828 | C5ORF16       | -0.2  |
| NM_173833 | MGC45780     | -0.2  | XM_379592 | LOC286144     | -0.2  |
| NM_198999 | PRES         | -0.2  | XM_167908 | LOC221140     | -0.2  |
| XM_376043 | LOC400948    | -0.2  | XM_376600 | LOC401330     | -0.2  |
| XM_374735 | LOC392730    | -0.2  | NM_002822 | PTK9          | -0.19 |
| NM_000684 | ADRB1        | -0.19 | NM_006888 | CALM1         | -0.19 |
| NM_080836 | STK35        | -0.19 | NM_004248 | GPR10         | -0.19 |
| NM_147199 | MRGX1        | -0.19 | NM_021170 | HES4          | -0.19 |
| NM_022768 | RBM15        | -0.19 | NM_001755 | CBFB          | -0.19 |
| NM_002918 | RFX1         | -0.19 | NM_001958 | EEF1A2        | -0.19 |
| NM_000320 | QDPR         | -0.19 | XM_046751 | PPFIA4        | -0.19 |
| NM_003070 | SMARCA2      | -0.19 | NM_022139 | GFRA4         | -0.19 |
| NM_004864 | GDF15        | -0.19 | NM_003841 | TNFRSF10C     | -0.19 |
| NM_139136 | KCNC2        | -0.19 | NM_004326 | BCL9          | -0.19 |
| NM_000099 | CST3         | -0.19 | NM_002231 | KAI1          | -0.19 |
| XM_037493 | SHANK3       | -0.19 | NM_005528 | DNAJC4        | -0.19 |
| NM_001931 | DLAT         | -0.19 | XM_035037 | LRP4          | -0.19 |
| NM_016533 | NINJ2        | -0.19 | NM_003134 | SRP14         | -0.19 |
| NM_001062 | TCN1         | -0.19 | NM_004679 | VCY           | -0.19 |

|              |           |       |              |              |       |
|--------------|-----------|-------|--------------|--------------|-------|
| NM_015080    | NRXN2     | -0.19 | NM_004818    | DDX23        | -0.19 |
| NM_014667    | VGLL4     | -0.19 | NM_006052    | DSCR3        | -0.19 |
| XM_375377    | KIAA0513  | -0.19 | NM_006373    | VAT1         | -0.19 |
| NM_007078    | LDB3      | -0.19 | NM_006704    | SUGT1        | -0.19 |
| NM_014284    | NCDN      | -0.19 | NM_013446    | MKRN1        | -0.19 |
| XM_290511    | ZDHHC5    | -0.19 | NM_014070    | C6ORF15      | -0.19 |
| NM_016331    | ANC_2H01  | -0.19 | NM_016061    | CGI-127      | -0.19 |
| NM_018364    | FLJ11220  | -0.19 | XM_371614    | FLJ10707     | -0.19 |
| NM_018553    | HSA277841 | -0.19 | NM_018277    | C21ORF77     | -0.19 |
| NM_031277    | RNF17     | -0.19 | NM_022978    | SERF1B       | -0.19 |
| NM_021211    | LOC58486  | -0.19 | NM_021938    | BRUNOL5      | -0.19 |
| NM_022371    | TOR3A     | -0.19 | NM_024054    | C7ORF25      | -0.19 |
| NM_024871    | FLJ12748  | -0.19 | NM_025219    | DNAJC5       | -0.19 |
| NM_053279    | C8ORF13   | -0.19 | NM_015059    | TLN2         | -0.19 |
| NM_052941    | GBP4      | -0.19 | NM_173353    | TPH2         | -0.19 |
| XM_050564    | MGC20533  | -0.19 | NM_145272    | LOC146853    | -0.19 |
| NM_152599    | FLJ35773  | -0.19 | XM_379198    | LOC285286    | -0.19 |
| NM_175920    | FLJ39485  | -0.19 | NM_182577    | C19ORF19     | -0.19 |
| NM_203302    | MGC70863  | -0.19 | NM_207468    | FLJ43505     | -0.19 |
| XM_291548    | LOC343406 | -0.19 | XM_290780    | LOC339237    | -0.19 |
| XM_372780    | LOC391045 | -0.19 | XM_374002    | LOC389023    | -0.19 |
| XM_371480    | LOC388929 | -0.19 | XM_372919    | LOC391356    | -0.19 |
| XM_374152    | LOC389353 | -0.19 | XM_379625    | LOC401495    | -0.19 |
| XM_351854    | LOC389797 | -0.19 | XM_373466    | LOC387690    | -0.19 |
| XM_372497    | LOC390426 | -0.19 | XM_372682    | LOC390816    | -0.19 |
| NM_001004331 | MGC88374  | -0.19 | NM_001005517 | OR5K4        | -0.19 |
| NM_022833    | C9ORF88   | -0.19 | NM_014011    | SOCS5        | -0.18 |
| NM_003505    | FZD1      | -0.18 | NM_015690    | STK36        | -0.18 |
| NM_178129    | P2RY8     | -0.18 | NM_032777    | GPR124       | -0.18 |
| NM_022304    | HRH2      | -0.18 | NM_014504    | RABGEF1      | -0.18 |
| NM_014048    | MRTF-B    | -0.18 | NM_003016    | SFRS2        | -0.18 |
| NM_003616    | SIP1      | -0.18 | NM_003898    | SYNJ2        | -0.18 |
| NM_024960    | PANK2     | -0.18 | NM_000602    | SERPINE1     | -0.18 |
| XM_047871    | DXS1283E  | -0.18 | NM_000250    | MPO          | -0.18 |
| NM_006519    | TCTEL1    | -0.18 | NM_003502    | AXIN1        | -0.18 |
| BC065228     | PSPHL     | -0.18 | NM_003930    | SCAP2        | -0.18 |
| NM_003921    | BCL10     | -0.18 | NM_002308    | LGALS9       | -0.18 |
| NM_005529    | HSPG2     | -0.18 | NM_007278    | GABARAP      | -0.18 |
| NM_005502    | ABCA1     | -0.18 | NM_032282    | DKFZP547D155 | -0.18 |
| NM_020396    | BCL2L10   | -0.18 | NM_001001395 | LMO3         | -0.18 |
| NM_021999    | ITM2B     | -0.18 | NM_004447    | EPS8         | -0.18 |
| NM_006545    | TUSC4     | -0.18 | XM_039393    | PLXNA4       | -0.18 |
| NM_003579    | RAD54L    | -0.18 | NM_000724    | CACNB2       | -0.18 |
| NM_004915    | ABCG1     | -0.18 | NM_015599    | PGM3         | -0.18 |
| NM_014049    | ACAD9     | -0.18 | NM_006714    | SMPDL3A      | -0.18 |
| NM_147200    | C6ORF4    | -0.18 | NM_015379    | BRI3         | -0.18 |



|              |               |       |              |               |       |
|--------------|---------------|-------|--------------|---------------|-------|
| NM_015527    | DKFZP434P1750 | -0.18 | NM_012200    | B3GAT3        | -0.18 |
| NM_015703    | CGI-96        | -0.18 | NM_012131    | CLDN17        | -0.18 |
| NM_016042    | EXOSC3        | -0.18 | NM_016352    | CPA4          | -0.18 |
| NM_016105    | FKBP7         | -0.18 | NM_016199    | LSM7          | -0.18 |
| NM_017583    | TRIM44        | -0.18 | XM_376664    | KIAA1218      | -0.18 |
| NM_145214    | TRIM11        | -0.18 | NM_030806    | C1ORF21       | -0.18 |
| NM_054028    | AMAC          | -0.18 | NM_032346    | MGC13096      | -0.18 |
| NM_053046    | EGLN2         | -0.18 | NM_052878    | IMAGE:4215339 | -0.18 |
| NM_178123    | SESTD1        | -0.18 | NM_138777    | MRRF          | -0.18 |
| NM_052964    | MIST          | -0.18 | NM_152325    | MGC40178      | -0.18 |
| XM_058879    | LOC124976     | -0.18 | NM_145257    | LOC126731     | -0.18 |
| NM_173502    | FLJ90661      | -0.18 | NM_173508    | SLC35F3       | -0.18 |
| NM_153365    | FLJ90013      | -0.18 | NM_173802    | MGC50559      | -0.18 |
| NM_198484    | ZNF621        | -0.18 | NM_182975    | FLJ20403      | -0.18 |
| NM_182574    | FLJ36070      | -0.18 | XM_295017    | C21ORF54      | -0.18 |
| NM_173690    | C9ORF126      | -0.18 | NM_198546    | LOC374955     | -0.18 |
| NM_198857    | FLJ43855      | -0.18 | NM_207433    | FLJ44874      | -0.18 |
| NM_003520    | HIST1H2BN     | -0.18 | XM_210411    | LOC285101     | -0.18 |
| XM_208320    | LOC285442     | -0.18 | NM_001005209 | MGC99813      | -0.18 |
| XM_295261    | LOC340511     | -0.18 | XM_373858    | LOC388667     | -0.18 |
| XM_373979    | LOC388938     | -0.18 | XM_379276    | LOC401155     | -0.18 |
| XM_373036    | LOC391707     | -0.18 | XM_376587    | LOC401316     | -0.18 |
| XM_373468    | LOC387697     | -0.18 | XM_373446    | LOC387632     | -0.18 |
| XM_373763    | LOC388436     | -0.18 | XM_373930    | LOC388820     | -0.18 |
| NM_001004473 | OR10K1        | -0.18 | NM_005913    | MC5R          | -0.17 |
| NM_138445    | GPR146        | -0.17 | NM_004664    | LIN7A         | -0.17 |
| NM_006527    | SLBP          | -0.17 | NM_007109    | TCF19         | -0.17 |
| NM_002657    | PLAGL2        | -0.17 | NM_021804    | ACE2          | -0.17 |
| NM_003758    | EIF3S1        | -0.17 | NM_002600    | PDE4B         | -0.17 |
| NM_001072    | UGT1A6        | -0.17 | NM_005575    | LNPEP         | -0.17 |
| NM_002574    | PRDX1         | -0.17 | NM_001380    | DOCK1         | -0.17 |
| NM_000104    | CYP1B1        | -0.17 | NM_003940    | USP13         | -0.17 |
| NM_022781    | RNF38         | -0.17 | NM_003939    | BTRC          | -0.17 |
| NM_001099    | ACPP          | -0.17 | NM_003580    | NSMAF         | -0.17 |
| NM_005749    | TOB1          | -0.17 | NM_001174    | ARHGAP6       | -0.17 |
| NM_001102    | ACTN1         | -0.17 | NM_000093    | COL5A1        | -0.17 |
| NM_004389    | CTNNA2        | -0.17 | NM_012261    | C20ORF103     | -0.17 |
| NM_000519    | HBD           | -0.17 | NM_207517    | ADAMTSL3      | -0.17 |
| NM_006767    | LZTR1         | -0.17 | NM_000379    | XDH           | -0.17 |
| NM_005490    | SH2D3A        | -0.17 | NM_006514    | SCN10A        | -0.17 |
| NM_012313    | KIR2DS3       | -0.17 | NM_002261    | KLRC3         | -0.17 |
| NM_002525    | NRD1          | -0.17 | NM_005935    | MLLT2         | -0.17 |
| NM_002864    | PZP           | -0.17 | NM_201563    | FCGR2C        | -0.17 |
| NM_014677    | RIMS2         | -0.17 | NM_014805    | EPM2AIP1      | -0.17 |
| XM_047357    | KIAA0342      | -0.17 | NM_014753    | BMS1L         | -0.17 |
| NM_015027    | KIAA0251      | -0.17 | NM_015684    | ATP5S         | -0.17 |

|           |              |       |           |           |       |
|-----------|--------------|-------|-----------|-----------|-------|
| NM_019003 | SPIN2        | -0.17 | NM_017772 | C6ORF197  | -0.17 |
| NM_020153 | FLJ21827     | -0.17 | XM_035497 | KIAA1602  | -0.17 |
| NM_145664 | SPANXB2      | -0.17 | NM_024069 | MGC2749   | -0.17 |
| NM_024719 | GRTP1        | -0.17 | NM_024116 | MGC5306   | -0.17 |
| XM_378723 | FLJ22659     | -0.17 | NM_032207 | FLJ21742  | -0.17 |
| NM_032358 | MGC13183     | -0.17 | NM_032732 | IL17RC    | -0.17 |
| NM_080860 | TSGA2        | -0.17 | NM_033345 | RGS8      | -0.17 |
| NM_052889 | COP          | -0.17 | NM_080605 | B3GALT6   | -0.17 |
| XM_086095 | LOC148203    | -0.17 | NM_144727 | CRYGN     | -0.17 |
| NM_152495 | FLJ38993     | -0.17 | NM_144725 | FLJ25439  | -0.17 |
| NM_198946 | LCN6         | -0.17 | NM_015338 | ASXL1     | -0.17 |
| NM_152608 | FLJ35382     | -0.17 | NM_173548 | ZNF584    | -0.17 |
| NM_152706 | MGC26647     | -0.17 | NM_170685 | TAC4      | -0.17 |
| XM_375713 | LOC284551    | -0.17 | XM_211843 | LOC285326 | -0.17 |
| XM_169434 | LOC219414    | -0.17 | XM_290743 | LOC339184 | -0.17 |
| XM_379189 | LOC401061    | -0.17 | XM_371561 | LOC389039 | -0.17 |
| XM_372004 | LOC389602    | -0.17 | XM_374121 | LOC389290 | -0.17 |
| XM_374236 | LOC389562    | -0.17 | XM_379526 | LOC401410 | -0.17 |
| XM_374401 | LOC392631    | -0.17 | XM_373469 | LOC387701 | -0.17 |
| XM_374325 | LOC389846    | -0.17 | NM_138316 | PANK1     | -0.16 |
| NM_000840 | GRM3         | -0.16 | NM_020649 | CBX8      | -0.16 |
| NM_017409 | HOXC10       | -0.16 | NM_005169 | PHOX2A    | -0.16 |
| NM_003924 | PHOX2B       | -0.16 | NM_005612 | REST      | -0.16 |
| NM_004498 | ONECUT1      | -0.16 | NM_019102 | HOXA5     | -0.16 |
| NM_024794 | ABHD9        | -0.16 | NM_006294 | UQCRB     | -0.16 |
| NM_002528 | NTHL1        | -0.16 | NM_000178 | GSS       | -0.16 |
| NM_002602 | PDE6G        | -0.16 | NM_003652 | CPZ       | -0.16 |
| NM_001136 | AGER         | -0.16 | NM_000915 | OXT       | -0.16 |
| NM_032902 | PPP1R16A     | -0.16 | NM_001789 | CDC25A    | -0.16 |
| NM_000600 | IL6          | -0.16 | NM_000595 | LTA       | -0.16 |
| NM_014166 | VDRIP        | -0.16 | NM_001643 | APOA2     | -0.16 |
| NM_001658 | ARF1         | -0.16 | NM_024596 | FLJ12847  | -0.16 |
| NM_014422 | PIB5PA       | -0.16 | NM_006439 | MAB21L2   | -0.16 |
| NM_080822 | OVCA2        | -0.16 | NM_004074 | COX8A     | -0.16 |
| NM_001312 | CRIP2        | -0.16 | NM_021010 | DEFA5     | -0.16 |
| NM_006934 | SLC6A9       | -0.16 | NM_001077 | UGT2B17   | -0.16 |
| NM_003526 | HIST1H2BC    | -0.16 | NM_006100 | SIAT10    | -0.16 |
| NM_006425 | SLU7         | -0.16 | NM_007356 | LAMB4     | -0.16 |
| NM_014001 | GGA3         | -0.16 | NM_015024 | XPO7      | -0.16 |
| NM_014614 | PSME4        | -0.16 | XM_291064 | KIAA0540  | -0.16 |
| NM_015496 | DKFZP4341116 | -0.16 | NM_021115 | SEZ6L     | -0.16 |
| XM_044196 | DKFZP434C212 | -0.16 | NM_014460 | PIPPIN    | -0.16 |
| NM_014170 | HSPC135      | -0.16 | NM_013319 | TERE1     | -0.16 |
| NM_152745 | NXPH1        | -0.16 | NM_018920 | PCDHGA7   | -0.16 |
| NM_020125 | SLAMF8       | -0.16 | NM_018330 | KIAA1598  | -0.16 |
| NM_024789 | C10ORF77     | -0.16 | NM_024682 | TBC1D17   | -0.16 |

|           |           |       |              |           |       |
|-----------|-----------|-------|--------------|-----------|-------|
| NM_033309 | MGC4655   | -0.16 | XM_056434    | TTC6      | -0.16 |
| NM_052900 | CSMD3     | -0.16 | NM_152355    | ZNF441    | -0.16 |
| NM_194317 | MGC52057  | -0.16 | NM_138802    | LOC130617 | -0.16 |
| XM_059074 | LOC126755 | -0.16 | NM_152450    | MGC26690  | -0.16 |
| XM_375359 | BEAN      | -0.16 | NM_138813    | ATP8B3    | -0.16 |
| NM_173513 | MGC43122  | -0.16 | NM_182536    | GDDR      | -0.16 |
| NM_153255 | MCMD1     | -0.16 | NM_152764    | MGC35212  | -0.16 |
| XM_374257 | LOC286114 | -0.16 | NM_005127    | CLECSF2   | -0.16 |
| NM_207435 | FLJ40142  | -0.16 | XM_292724    | LOC342934 | -0.16 |
| XM_211988 | LOC285711 | -0.16 | XM_084445    | LOC143158 | -0.16 |
| XM_372757 | LOC390992 | -0.16 | XM_374006    | LOC389028 | -0.16 |
| XM_373773 | LOC388461 | -0.16 | XM_375307    | LOC400508 | -0.16 |
| XM_372639 | LOC390732 | -0.16 | XM_371411    | LOC388819 | -0.16 |
| NM_002005 | FES       | -0.15 | NM_020666    | CLK4      | -0.15 |
| NM_022150 | C7ORF9    | -0.15 | NM_001506    | GPR32     | -0.15 |
| NM_002383 | MAZ       | -0.15 | NM_012311    | KIN       | -0.15 |
| NM_016157 | TRO       | -0.15 | NM_007128    | VPREB1    | -0.15 |
| NM_000541 | SAG       | -0.15 | NM_001989    | EVX1      | -0.15 |
| NM_001497 | B4GALT1   | -0.15 | NM_000537    | REN       | -0.15 |
| NM_007332 | TRPA1     | -0.15 | NM_005857    | ZMPSTE24  | -0.15 |
| NM_005349 | RBPSUH    | -0.15 | NM_001001549 | GRB10     | -0.15 |
| NM_000827 | GRIA1     | -0.15 | NM_002088    | GRIK5     | -0.15 |
| NM_000212 | ITGB3     | -0.15 | NM_002305    | LGALS1    | -0.15 |
| NM_000385 | AQP1      | -0.15 | NM_021007    | SCN2A2    | -0.15 |
| NM_004976 | KCNC1     | -0.15 | NM_012471    | TRPC5     | -0.15 |
| NM_015595 | SGEF      | -0.15 | NM_033043    | CGB5      | -0.15 |
| NM_002064 | GLRX      | -0.15 | NM_000889    | ITGB7     | -0.15 |
| NM_024599 | RHBDL6    | -0.15 | NM_023934    | HCBP6     | -0.15 |
| NM_033415 | MGC19595  | -0.15 | NM_018403    | HSA275986 | -0.15 |
| NM_000447 | PSEN2     | -0.15 | NM_012432    | SETDB1    | -0.15 |
| NM_000662 | NAT1      | -0.15 | NM_001687    | ATP5D     | -0.15 |
| NM_005005 | NDUFB9    | -0.15 | NM_006403    | NEDD9     | -0.15 |
| NM_033224 | PURB      | -0.15 | NM_007370    | RFC5      | -0.15 |
| NM_003063 | SLN       | -0.15 | NM_004644    | AP3B2     | -0.15 |
| NM_145911 | ZNF23     | -0.15 | NM_021100    | NFS1      | -0.15 |
| XM_376764 | PNMA2     | -0.15 | NM_015463    | C2ORF32   | -0.15 |
| XM_291253 | KIAA0146  | -0.15 | NM_016449    | LOC51233  | -0.15 |
| NM_018191 | RCBTB1    | -0.15 | NM_022356    | LEPRE1    | -0.15 |
| NM_022494 | ZDHHC6    | -0.15 | NM_022841    | FLJ12994  | -0.15 |
| NM_024844 | PCNT1     | -0.15 | NM_032139    | ANKRD27   | -0.15 |
| NM_032412 | ORF1-FL49 | -0.15 | NM_032492    | GL009     | -0.15 |
| NM_152350 | MGC40157  | -0.15 | XM_370871    | LOC145837 | -0.15 |
| NM_178496 | LOC151963 | -0.15 | NM_207332    | LOC157697 | -0.15 |
| NM_173523 | MAGEB6    | -0.15 | XM_376474    | LOC166994 | -0.15 |
| NM_138294 | PATE      | -0.15 | NM_182830    | MAMDC1    | -0.15 |
| NM_194300 | LOC223075 | -0.15 | NM_182904    | P4HA3     | -0.15 |

|           |              |       |           |           |       |
|-----------|--------------|-------|-----------|-----------|-------|
| NM_152768 | FLJ25378     | -0.15 | NM_153757 | NAP1L5    | -0.15 |
| XM_379119 | LOC285000    | -0.15 | NM_175910 | ZNF493    | -0.15 |
| XM_371632 | FLJ36157     | -0.15 | NM_182973 | TMPRSS9   | -0.15 |
| XM_291321 | LOC340527    | -0.15 | XM_209913 | LOC286140 | -0.15 |
| XM_371500 | LOC388960    | -0.15 | XM_377831 | LOC402165 | -0.15 |
| XM_380047 | LOC402697    | -0.15 | XM_373495 | LOC387761 | -0.15 |
| XM_372522 | LOC390468    | -0.15 | XM_378735 | LOC400642 | -0.15 |
| XM_371134 | LOC388503    | -0.15 | NM_032630 | CINP      | -0.14 |
| NM_001220 | CAMK2B       | -0.14 | NM_015985 | ANGPT4    | -0.14 |
| NM_031916 | ASP          | -0.14 | NM_006475 | POSTN     | -0.14 |
| NM_172250 | MMAA         | -0.14 | NM_000442 | PECAM1    | -0.14 |
| NM_001973 | ELK4         | -0.14 | NM_016270 | KLF2      | -0.14 |
| NM_003111 | SP3          | -0.14 | NM_003722 | TP73L     | -0.14 |
| NM_021809 | TGIF2        | -0.14 | NM_014172 | PHPT1     | -0.14 |
| NM_015256 | ACSL6        | -0.14 | NM_001225 | CASP4     | -0.14 |
| NM_012161 | FBXL5        | -0.14 | NM_003015 | SFRP5     | -0.14 |
| NM_000614 | CNTF         | -0.14 | NM_000742 | CHRNA2    | -0.14 |
| NM_004452 | ESRRB        | -0.14 | NM_000435 | NOTCH3    | -0.14 |
| NM_018098 | ECT2         | -0.14 | NM_000090 | COL3A1    | -0.14 |
| NM_000891 | KCNJ2        | -0.14 | NM_000719 | CACNA1C   | -0.14 |
| NM_000720 | CACNA1D      | -0.14 | NM_012434 | SLC17A5   | -0.14 |
| NM_024492 | LPAL2        | -0.14 | NM_018896 | CACNA1G   | -0.14 |
| NM_001951 | E2F5         | -0.14 | NM_012211 | ITGA11    | -0.14 |
| NM_020142 | LOC56901     | -0.14 | NM_005532 | IFI27     | -0.14 |
| NM_012333 | MYCBP        | -0.14 | NM_005380 | NBL1      | -0.14 |
| NM_181782 | NCOA7        | -0.14 | NM_002243 | KCNJ15    | -0.14 |
| NM_002544 | OMG          | -0.14 | NM_002371 | MAL       | -0.14 |
| NM_003545 | HIST1H4E     | -0.14 | XM_085596 | ZNF18     | -0.14 |
| NM_003622 | PPFIBP1      | -0.14 | XM_378182 | CHD1L     | -0.14 |
| NM_014652 | IPO13        | -0.14 | NM_005847 | SLC23A1   | -0.14 |
| NM_006424 | SLC34A2      | -0.14 | XM_034904 | KIAA0912  | -0.14 |
| NM_015094 | HIC2         | -0.14 | XM_041018 | KIAA0367  | -0.14 |
| NM_014966 | DHX30        | -0.14 | NM_014038 | BZW2      | -0.14 |
| NM_016176 | CAB45        | -0.14 | NM_019027 | FLJ20273  | -0.14 |
| NM_017634 | KCTD9        | -0.14 | NM_017653 | FLJ20071  | -0.14 |
| NM_018385 | FLJ11301     | -0.14 | NM_018480 | HT007     | -0.14 |
| NM_018655 | LENEP        | -0.14 | NM_020223 | FAM20C    | -0.14 |
| NM_022742 | DKFZP434G156 | -0.14 | NM_022905 | FLJ12572  | -0.14 |
| NM_032647 | MGC10561     | -0.14 | NM_032681 | TRIM51    | -0.14 |
| XM_058964 | LOC89887     | -0.14 | NM_033122 | NYD-SP26  | -0.14 |
| NM_138787 | LOC119710    | -0.14 | NM_152394 | MGC39662  | -0.14 |
| NM_152439 | VMD2L3       | -0.14 | NM_144670 | FLJ25179  | -0.14 |
| NM_152600 | ZNF579       | -0.14 | NM_152652 | ZNF553    | -0.14 |
| NM_152729 | NT5C2L1      | -0.14 | NM_153045 | C9ORF91   | -0.14 |
| NM_153691 | FLJ90036     | -0.14 | XM_372528 | FLJ36749  | -0.14 |
| XM_379690 | FAM41C       | -0.14 | NM_198082 | LOC284001 | -0.14 |

|              |           |       |           |              |       |
|--------------|-----------|-------|-----------|--------------|-------|
| NM_172367    | TUSC5     | -0.14 | NM_198153 | TLT4         | -0.14 |
| NM_198494    | FLJ16030  | -0.14 | XM_379700 | LOC286442    | -0.14 |
| XM_292012    | LOC341315 | -0.14 | XM_088680 | LOC158813    | -0.14 |
| XM_371555    | LOC389031 | -0.14 | XM_373890 | LOC388746    | -0.14 |
| XM_372125    | LOC389768 | -0.14 | XM_376852 | LOC401516    | -0.14 |
| XM_370634    | LOC387781 | -0.14 | XM_372651 | LOC390754    | -0.14 |
| NM_001001657 | OR2Y1     | -0.14 | XM_373952 | LOC388889    | -0.14 |
| NM_006738    | AKAP13    | -0.13 | NM_002732 | PRKACG       | -0.13 |
| NM_005028    | PIP5K2A   | -0.13 | NM_006826 | YWHAQ        | -0.13 |
| NM_004983    | KCNJ9     | -0.13 | NM_006135 | CAPZA1       | -0.13 |
| NM_000599    | IGFBP5    | -0.13 | NM_153686 | MLR1         | -0.13 |
| NM_002097    | GTF3A     | -0.13 | NM_003325 | HIRA         | -0.13 |
| NM_006621    | AHCYL1    | -0.13 | NM_003206 | TCF21        | -0.13 |
| NM_005418    | ST5       | -0.13 | NM_014508 | APOBEC3C     | -0.13 |
| NM_002177    | IFNW1     | -0.13 | NM_003889 | NR1I2        | -0.13 |
| NM_001988    | EVPL      | -0.13 | NM_005419 | STAT2        | -0.13 |
| NM_000218    | KCNQ1     | -0.13 | NM_002704 | PPBP         | -0.13 |
| NM_021960    | MCL1      | -0.13 | NM_003632 | CNTNAP1      | -0.13 |
| NM_004804    | CIAO1     | -0.13 | NM_013324 | CISH         | -0.13 |
| NM_001763    | CD1A      | -0.13 | BC069763  | C2orf12      | -0.13 |
| NM_031474    | NRIP2     | -0.13 | NM_002152 | HRC          | -0.13 |
| NM_001531    | MR1       | -0.13 | NM_002143 | HPCA         | -0.13 |
| NM_002361    | MAG       | -0.13 | NM_000607 | ORM1         | -0.13 |
| NM_002491    | NDUFB3    | -0.13 | NM_014229 | SLC6A11      | -0.13 |
| NM_013359    | ZNF221    | -0.13 | NM_022719 | DGCR14       | -0.13 |
| NM_021015    | SSX5      | -0.13 | NM_004676 | PRY          | -0.13 |
| NM_006418    | GW112     | -0.13 | NM_024330 | SLC27A3      | -0.13 |
| NM_006668    | CYP46A1   | -0.13 | XM_375471 | KIAA0924     | -0.13 |
| NM_013264    | DDX25     | -0.13 | NM_013442 | STOML2       | -0.13 |
| NM_016347    | CML2      | -0.13 | NM_017874 | C20ORF27     | -0.13 |
| NM_018188    | ATAD3A    | -0.13 | NM_018569 | PRO0971      | -0.13 |
| NM_018463    | MDS028    | -0.13 | NM_020353 | PLSCR4       | -0.13 |
| XM_375557    | C19ORF29  | -0.13 | NM_021932 | RIC-8        | -0.13 |
| NM_024658    | IPO4      | -0.13 | NM_024681 | FLJ12242     | -0.13 |
| NM_032880    | MGC15730  | -0.13 | XM_071712 | LOC120376    | -0.13 |
| NM_145250    | C14ORF6   | -0.13 | NM_133452 | RAVER1       | -0.13 |
| NM_152367    | FLJ38716  | -0.13 | NM_145048 | MGC29898     | -0.13 |
| NM_144662    | MGC26605  | -0.13 | XM_378558 | LOC146443    | -0.13 |
| NM_152552    | SAMD3     | -0.13 | NM_144981 | FLJ25059     | -0.13 |
| NM_152758    | YTHDF3    | -0.13 | NM_182559 | MGC57341     | -0.13 |
| NM_173657    | FLJ31139  | -0.13 | XM_378858 | LOC339539    | -0.13 |
| NM_207354    | LOC338692 | -0.13 | XM_375606 | DKFZP779O175 | -0.13 |
| NM_207503    | FLJ42280  | -0.13 | XM_291577 | LOC339521    | -0.13 |
| XM_088686    | LOC158825 | -0.13 | XM_294387 | LOC340359    | -0.13 |
| XM_373838    | LOC388617 | -0.13 | XM_379849 | LOC402522    | -0.13 |
| XM_371157    | LOC388526 | -0.13 | NM_018238 | FLJ10842     | -0.12 |

|              |           |       |              |           |       |
|--------------|-----------|-------|--------------|-----------|-------|
| NM_000476    | AK1       | -0.12 | NM_004566    | PFKFB3    | -0.12 |
| NM_003258    | TK1       | -0.12 | NM_022096    | ANKRD5    | -0.12 |
| NM_173856    | VN1R2     | -0.12 | NM_005461    | MAFB      | -0.12 |
| NM_016544    | RBJ       | -0.12 | NM_002163    | ICSBP1    | -0.12 |
| NM_002539    | ODC1      | -0.12 | XM_290331    | GGT2      | -0.12 |
| NM_025104    | DRF1      | -0.12 | NM_005915    | MCM6      | -0.12 |
| NM_003117    | SPAM1     | -0.12 | NM_012180    | FBXO8     | -0.12 |
| NM_004964    | HDAC1     | -0.12 | NM_005861    | STUB1     | -0.12 |
| NM_012276    | ILT7      | -0.12 | NM_005408    | CCL13     | -0.12 |
| NM_006664    | CCL27     | -0.12 | NM_007179    | INSL6     | -0.12 |
| NM_080387    | CLECSF8   | -0.12 | NM_001489    | NR6A1     | -0.12 |
| NM_004114    | FGF13     | -0.12 | NM_003235    | TG        | -0.12 |
| NM_014191    | SCN8A     | -0.12 | NM_004749    | TBRG4     | -0.12 |
| NM_003074    | SMARCC1   | -0.12 | NM_001487    | BLOC1S1   | -0.12 |
| NM_006031    | PCNT2     | -0.12 | NM_002902    | RCN2      | -0.12 |
| NM_005632    | SOLH      | -0.12 | NM_021160    | BAT5      | -0.12 |
| NM_005747    | ELA3A     | -0.12 | NM_014849    | SV2A      | -0.12 |
| NM_021267    | LASS1     | -0.12 | NM_006558    | KHDRBS3   | -0.12 |
| XM_376903    | KIAA0674  | -0.12 | NM_015352    | POFUT1    | -0.12 |
| NM_016354    | SLCO4A1   | -0.12 | NM_013290    | HUMGT198A | -0.12 |
| NM_013335    | GMPPA     | -0.12 | NM_017922    | PRPF39    | -0.12 |
| NM_017639    | CDHJ      | -0.12 | NM_017729    | EPS8L1    | -0.12 |
| NM_018248    | FLJ10858  | -0.12 | NM_022840    | METTL4    | -0.12 |
| NM_024988    | FLJ12355  | -0.12 | NM_030570    | UPK3B     | -0.12 |
| NM_024869    | FLJ14050  | -0.12 | NM_030633    | KIAA1712  | -0.12 |
| NM_025201    | PP9099    | -0.12 | NM_032222    | FLJ22374  | -0.12 |
| NM_032226    | ZCCHC7    | -0.12 | NM_201517    | H2AFV     | -0.12 |
| NM_138385    | LOC92305  | -0.12 | NM_194326    | MGC52010  | -0.12 |
| XM_351317    | LEMD1     | -0.12 | NM_152322    | BTBD11    | -0.12 |
| NM_178229    | IQGAP3    | -0.12 | NM_145050    | MGC27434  | -0.12 |
| NM_080621    | C20ORF136 | -0.12 | NM_144712    | SLC23A3   | -0.12 |
| XM_370785    | C14ORF81  | -0.12 | NM_138330    | TIZ       | -0.12 |
| NM_145064    | STAC3     | -0.12 | XM_379684    | LOC286238 | -0.12 |
| XM_292740    | LOC342892 | -0.12 | NM_198180    | P518      | -0.12 |
| NM_207386    | FLJ45455  | -0.12 | XM_292197    | LOC341651 | -0.12 |
| XM_099034    | LOC159170 | -0.12 | XM_208554    | LOC283226 | -0.12 |
| XM_373831    | LOC388604 | -0.12 | XM_379489    | LOC401345 | -0.12 |
| XM_371770    | LOC389322 | -0.12 | XM_376643    | LOC401383 | -0.12 |
| XM_374371    | LOC392177 | -0.12 | XM_373238    | LOC392188 | -0.12 |
| XM_372498    | LOC390427 | -0.12 | XM_378381    | LOC400070 | -0.12 |
| XM_373682    | LOC388270 | -0.12 | XM_371177    | LOC388551 | -0.12 |
| XM_373666    | LOC388214 | -0.12 | XM_373670    | LOC388227 | -0.12 |
| NM_001001412 | FAM26C    | -0.12 | NM_001005280 | OR10A7    | -0.12 |
| XM_373970    | LOC388917 | -0.12 | NM_000292    | PHKA2     | -0.11 |
| NM_153840    | GPR110    | -0.11 | NM_000584    | IL8       | -0.11 |
| NM_012418    | FSCN2     | -0.11 | NM_020227    | PRDM9     | -0.11 |

|           |           |       |              |           |       |
|-----------|-----------|-------|--------------|-----------|-------|
| NM_016260 | ZNFN1A2   | -0.11 | NM_007011    | ABHD2     | -0.11 |
| NM_004413 | DPEP1     | -0.11 | NM_145740    | GSTA1     | -0.11 |
| NM_000015 | NAT2      | -0.11 | NM_001665    | RHOG      | -0.11 |
| NM_004666 | VNN1      | -0.11 | NM_005706    | TSSC4     | -0.11 |
| NM_014080 | DUOX2     | -0.11 | NM_000504    | F10       | -0.11 |
| NM_000029 | AGT       | -0.11 | NM_005067    | SIAH2     | -0.11 |
| NM_181790 | GPR142    | -0.11 | NM_003393    | WNT8B     | -0.11 |
| NM_003247 | THBS2     | -0.11 | NM_006931    | SLC2A3    | -0.11 |
| NM_033364 | AAT1      | -0.11 | NM_004996    | ABCC1     | -0.11 |
| NM_000718 | CACNA1B   | -0.11 | NM_014944    | CLSTN1    | -0.11 |
| NM_002017 | FLI1      | -0.11 | NM_006547    | IMP-3     | -0.11 |
| NM_015069 | ZNF423    | -0.11 | NM_006819    | STIP1     | -0.11 |
| NM_017460 | CYP3A4    | -0.11 | NM_002370    | MAGOH     | -0.11 |
| NM_004164 | RBP2      | -0.11 | NM_002972    | SBF1      | -0.11 |
| NM_003009 | SEPW1     | -0.11 | NM_003452    | ZNF189    | -0.11 |
| NM_004199 | P4HA2     | -0.11 | NM_006364    | SEC23A    | -0.11 |
| NM_006635 | ZNF272    | -0.11 | NM_181873    | CRA       | -0.11 |
| NM_007046 | EMILIN1   | -0.11 | NM_012307    | EPB41L3   | -0.11 |
| NM_015515 | KRT23     | -0.11 | NM_015600    | C20ORF22  | -0.11 |
| NM_014435 | ASAHL     | -0.11 | NM_016075    | C13ORF9   | -0.11 |
| NM_016575 | TU12B1-TY | -0.11 | NM_018259    | TTC17     | -0.11 |
| NM_017865 | FLJ20531  | -0.11 | NM_018396    | METTL2    | -0.11 |
| XM_047995 | ODZ2      | -0.11 | NM_020773    | TBC1D14   | -0.11 |
| NM_024082 | TMG3      | -0.11 | NM_024516    | MGC4606   | -0.11 |
| NM_024098 | MGC2574   | -0.11 | NM_024544    | FLJ12875  | -0.11 |
| XM_379403 | C6ORF12   | -0.11 | NM_024901    | FLJ22457  | -0.11 |
| NM_032484 | LGP1      | -0.11 | NM_032327    | ZDHHC16   | -0.11 |
| NM_032866 | FLJ14957  | -0.11 | XM_372210    | PPP1R3F   | -0.11 |
| NM_033557 | LOC90522  | -0.11 | NM_138785    | C6ORF72   | -0.11 |
| NM_144675 | MGC18079  | -0.11 | NM_138471    | LOC144097 | -0.11 |
| NM_207334 | FLJ44952  | -0.11 | XM_114087    | KIAA1836  | -0.11 |
| NM_174924 | LOC204474 | -0.11 | NM_147197    | WFDC11    | -0.11 |
| NM_203376 | LOC388730 | -0.11 | NM_173604    | FLJ25694  | -0.11 |
| XM_375313 | MGC9515   | -0.11 | NM_199163    | FLJ25222  | -0.11 |
| NM_212553 | LOC391622 | -0.11 | NM_207461    | FLJ44881  | -0.11 |
| XM_059037 | LOC126374 | -0.11 | XM_097729    | LOC149704 | -0.11 |
| XM_298053 | LOC347487 | -0.11 | XM_379079    | LOC400946 | -0.11 |
| XM_372954 | LOC391429 | -0.11 | XM_371771    | LOC389323 | -0.11 |
| XM_379299 | LOC401165 | -0.11 | XM_380007    | LOC402663 | -0.11 |
| XM_374904 | LOC399921 | -0.11 | XM_370965    | LOC388242 | -0.11 |
| XM_373788 | LOC388494 | -0.11 | NM_001001703 | FLJ46010  | -0.11 |
| XM_373962 | LOC388903 | -0.11 | NM_153220    | MGC35440  | -0.11 |
| NM_022784 | FLJ12476  | -0.1  | NM_005781    | ACK1      | -0.1  |
| NM_014572 | LATS2     | -0.1  | NM_013233    | STK39     | -0.1  |
| NM_002075 | GNB3      | -0.1  | NM_019858    | GRCA      | -0.1  |
| NM_012351 | OR10J1    | -0.1  | NM_003382    | VIPR2     | -0.1  |

|              |           |       |           |               |       |
|--------------|-----------|-------|-----------|---------------|-------|
| NM_004365    | CETN3     | -0.1  | NM_006822 | RAB40B        | -0.1  |
| NM_003735    | PCDHGA12  | -0.1  | NM_005701 | RNUT1         | -0.1  |
| NM_003443    | ZNF151    | -0.1  | NM_000488 | SERPINC1      | -0.1  |
| NM_181872    | DMRT2     | -0.1  | NM_003792 | EDF1          | -0.1  |
| NM_004239    | TRIP11    | -0.1  | NM_000161 | GCH1          | -0.1  |
| NM_005026    | PIK3CD    | -0.1  | NM_000147 | FUCA1         | -0.1  |
| NM_003001    | SDHC      | -0.1  | NM_006009 | TUBA3         | -0.1  |
| NM_002014    | FKBP4     | -0.1  | NM_020410 | ATP13A        | -0.1  |
| NM_002931    | RING1     | -0.1  | NM_005811 | GDF11         | -0.1  |
| NM_005623    | CCL8      | -0.1  | NM_000591 | CD14          | -0.1  |
| NM_001627    | ALCAM     | -0.1  | NM_002272 | KRT4          | -0.1  |
| NM_153334    | SCARF2    | -0.1  | NM_145818 | COG4          | -0.1  |
| NM_018190    | BBS7      | -0.1  | NM_153478 | CSAG1         | -0.1  |
| NM_016412    | IGF2AS    | -0.1  | NM_003978 | PSTPIP1       | -0.1  |
| NR_001447    | MT1L      | -0.1  | NM_024611 | NARG2         | -0.1  |
| NM_002977    | SCN9A     | -0.1  | NM_002888 | RARRES1       | -0.1  |
| NM_003149    | STAC      | -0.1  | NM_017818 | WDR8          | -0.1  |
| NM_001693    | ATP6V1B2  | -0.1  | NM_014206 | C11ORF10      | -0.1  |
| NM_000704    | ATP4A     | -0.1  | NM_001503 | GPLD1         | -0.1  |
| NM_021728    | OTX2      | -0.1  | NM_005947 | MT1B          | -0.1  |
| NM_017651    | AHI1      | -0.1  | NM_002780 | PSG4          | -0.1  |
| NM_002909    | REG1A     | -0.1  | NM_003543 | HIST1H4H      | -0.1  |
| NM_153029    | N4BP1     | -0.1  | XM_371036 | KIAA0100      | -0.1  |
| NM_014706    | SART3     | -0.1  | NM_006049 | SNAPC5        | -0.1  |
| NM_006438    | COLEC10   | -0.1  | NM_025176 | KIAA0980      | -0.1  |
| XM_038664    | KIAA0564  | -0.1  | NM_016643 | LOC51333      | -0.1  |
| XM_042685    | KIAA1414  | -0.1  | XM_030729 | DKFZP434I1117 | -0.1  |
| XM_371082    | FLJ20753  | -0.1  | NM_017837 | FLJ20477      | -0.1  |
| NM_017849    | FLJ20507  | -0.1  | NM_019594 | LRRC8         | -0.1  |
| NM_024065    | PDCL3     | -0.1  | NM_024723 | FLJ23471      | -0.1  |
| NM_024956    | FLJ23375  | -0.1  | XM_046861 | BA526D8.4     | -0.1  |
| NM_080596    | HIST1H2AH | -0.1  | NM_145254 | LOC124491     | -0.1  |
| NM_213596    | FOXN4     | -0.1  | NM_203298 | CHCHD1        | -0.1  |
| NM_194279    | HBLD1     | -0.1  | NM_178859 | OSTBETA       | -0.1  |
| NM_145271    | LOC146542 | -0.1  | XM_379437 | LOC153910     | -0.1  |
| NM_203408    | LOC158724 | -0.1  | NM_178498 | MGC52019      | -0.1  |
| NM_174927    | SPAS1     | -0.1  | NM_173552 | MGC33365      | -0.1  |
| NM_178816    | CASC2     | -0.1  | XM_375443 | LOC284100     | -0.1  |
| NM_181609    | KRTAP19-3 | -0.1  | NM_181840 | TRIK          | -0.1  |
| NM_207172    | GPR154    | -0.1  | NM_182827 | FKBP9L        | -0.1  |
| NM_001004342 | TRIM67    | -0.1  | XM_173120 | LOC254938     | -0.1  |
| XM_292664    | LOC342659 | -0.1  | XM_209196 | LOC284422     | -0.1  |
| XM_066484    | LOC139116 | -0.1  | XM_373824 | LOC388589     | -0.1  |
| XM_379077    | LOC400944 | -0.1  | XM_373600 | LOC388002     | -0.1  |
| NM_016248    | AKAP11    | -0.09 | NM_017662 | TRPM6         | -0.09 |
| NM_005433    | YES1      | -0.09 | NM_006794 | GPR75         | -0.09 |



|           |               |       |           |           |       |
|-----------|---------------|-------|-----------|-----------|-------|
| NM_013936 | OR12D2        | -0.09 | NM_012368 | OR2C1     | -0.09 |
| NM_017422 | CALML5        | -0.09 | NM_014056 | HIG1      | -0.09 |
| NM_000247 | MICA          | -0.09 | NM_000295 | SERPINA1  | -0.09 |
| NM_004316 | ASCL1         | -0.09 | NM_006896 | HOXA7     | -0.09 |
| NM_012481 | ZNFN1A3       | -0.09 | NM_016066 | GLRX2     | -0.09 |
| NM_016576 | GMPR2         | -0.09 | NM_004455 | EXTL1     | -0.09 |
| NM_003288 | TPD52L2       | -0.09 | NM_030648 | SET7      | -0.09 |
| NM_001889 | CRYZ          | -0.09 | NM_000444 | PHEX      | -0.09 |
| NM_022089 | HSA9947       | -0.09 | NM_007218 | RNF139    | -0.09 |
| XM_097508 | LGR6          | -0.09 | NM_022455 | NSD1      | -0.09 |
| NM_021132 | PPP3CB        | -0.09 | NM_017581 | CHRNA9    | -0.09 |
| NM_130770 | HTR3C         | -0.09 | NM_001632 | ALPP      | -0.09 |
| NM_052866 | ADAMTSL1      | -0.09 | NM_006433 | GNLY      | -0.09 |
| NM_005876 | APEG1         | -0.09 | NM_006353 | HMGNA4    | -0.09 |
| NM_005573 | LMNB1         | -0.09 | NM_016424 | LUC7A     | -0.09 |
| NM_005584 | MAB21L1       | -0.09 | NM_017569 | P38IP     | -0.09 |
| NM_003027 | SH3GL3        | -0.09 | NM_005414 | SKIL      | -0.09 |
| XM_372058 | PVT1          | -0.09 | NM_001215 | CA6       | -0.09 |
| NM_004968 | ICA1          | -0.09 | NM_005216 | DDOST     | -0.09 |
| NM_005337 | HEM1          | -0.09 | NM_001532 | SLC29A2   | -0.09 |
| NM_005042 | PRH2          | -0.09 | NM_004545 | NDUFB1    | -0.09 |
| NM_003046 | SLC7A2        | -0.09 | NM_002978 | SCNN1D    | -0.09 |
| NM_007113 | THH           | -0.09 | NM_004645 | COIL      | -0.09 |
| NM_003444 | ZNF154        | -0.09 | NM_003575 | ZNF282    | -0.09 |
| NM_004694 | SLC16A6       | -0.09 | NM_003795 | SNX3      | -0.09 |
| NM_004713 | SDCCAG1       | -0.09 | NM_014771 | RNF40     | -0.09 |
| XM_376518 | C6ORF84       | -0.09 | XM_166270 | KIAA0774  | -0.09 |
| NM_015278 | SASH1         | -0.09 | NM_015478 | L3MBTL    | -0.09 |
| NM_015602 | LAP1B         | -0.09 | NM_138768 | MYEOV     | -0.09 |
| NM_013400 | REPIN1        | -0.09 | NM_016297 | PCYOX1    | -0.09 |
| NM_018967 | SNTG1         | -0.09 | NM_017868 | TTC12     | -0.09 |
| NM_015590 | FLJ20249      | -0.09 | NM_017530 | LOC55565  | -0.09 |
| NM_031415 | MLZE          | -0.09 | NM_020163 | LOC56920  | -0.09 |
| NM_021242 | MIG12         | -0.09 | XM_172801 | KIAA1210  | -0.09 |
| XM_291090 | RNF150        | -0.09 | NM_024051 | C7ORF24   | -0.09 |
| NM_024762 | ZNF552        | -0.09 | NM_024782 | FLJ12610  | -0.09 |
| NM_030817 | DKFZP434F0318 | -0.09 | NM_031955 | NYD-SP12  | -0.09 |
| NM_032836 | FLJ14768      | -0.09 | NM_032526 | NT5C1A    | -0.09 |
| NM_032377 | MGC4549       | -0.09 | NM_145243 | MPRP-1    | -0.09 |
| XM_054983 | ZNF618        | -0.09 | NM_173477 | USH1G     | -0.09 |
| NM_058169 | LOH12CR1      | -0.09 | XM_069035 | C6ORF213  | -0.09 |
| NM_130773 | CNTNAP5       | -0.09 | XM_378680 | LOC147080 | -0.09 |
| XM_378550 | LOC145757     | -0.09 | NM_153353 | MGC27085  | -0.09 |
| XM_032542 | FLJ41352      | -0.09 | NM_152583 | MGC40053  | -0.09 |
| NM_182529 | THAP5         | -0.09 | NM_152699 | SENP5     | -0.09 |
| NM_173591 | FLJ90579      | -0.09 | NM_203392 | LOC284123 | -0.09 |

|              |           |       |           |              |       |
|--------------|-----------|-------|-----------|--------------|-------|
| NM_133466    | ZNF545    | -0.09 | XM_376566 | LOC285924    | -0.09 |
| NM_203282    | ZNF539    | -0.09 | NM_078471 | MYO18A       | -0.09 |
| NM_207581    | LOC405753 | -0.09 | XM_208204 | LOC284441    | -0.09 |
| XM_373056    | LOC391742 | -0.09 | XM_374290 | LOC389703    | -0.09 |
| XM_370898    | LOC388166 | -0.09 | XM_371019 | LOC388339    | -0.09 |
| XM_377027    | LOC401605 | -0.09 | XM_377073 | LOC401624    | -0.09 |
| NM_001001938 | C9ORF47   | -0.09 | NM_005255 | GAK          | -0.08 |
| NM_030768    | ILKAP     | -0.08 | NM_002530 | NTRK3        | -0.08 |
| NM_000431    | MVK       | -0.08 | NM_005161 | AGTRL1       | -0.08 |
| NM_014496    | RPS6KA6   | -0.08 | NM_015292 | MBC2         | -0.08 |
| NM_130806    | LGR8      | -0.08 | NM_002921 | RGR          | -0.08 |
| NM_014004    | PCDHGA8   | -0.08 | NM_006499 | LGALS8       | -0.08 |
| NM_005312    | RAPGEF1   | -0.08 | NM_001938 | DR1          | -0.08 |
| NM_002479    | MYOG      | -0.08 | NM_002460 | IRF4         | -0.08 |
| NM_177398    | LMX1A     | -0.08 | NM_017825 | ADPRHL2      | -0.08 |
| NM_001648    | KLK3      | -0.08 | NM_000434 | NEU1         | -0.08 |
| NM_020663    | RHOJ      | -0.08 | NM_000373 | UMPS         | -0.08 |
| NM_005373    | MPL       | -0.08 | NM_002119 | HLA-DOA      | -0.08 |
| NM_001192    | TNFRSF17  | -0.08 | NM_000173 | GP1BA        | -0.08 |
| NM_000419    | ITGA2B    | -0.08 | NM_000745 | CHRNA5       | -0.08 |
| NM_000089    | COL1A2    | -0.08 | NM_144606 | BHD          | -0.08 |
| NM_052818    | CG018     | -0.08 | NM_002994 | CXCL5        | -0.08 |
| NM_017589    | BTG4      | -0.08 | NM_001240 | CCNT1        | -0.08 |
| NM_006021    | DLEU2     | -0.08 | NM_000420 | KEL          | -0.08 |
| XM_049619    | PRDM6     | -0.08 | NM_004136 | IREB2        | -0.08 |
| NM_002218    | ITIH4     | -0.08 | NM_003022 | SH3BGRL      | -0.08 |
| NM_007131    | ZNF75     | -0.08 | XM_371150 | ZNF90        | -0.08 |
| NM_003128    | SPTBN1    | -0.08 | NM_007148 | ZNF179       | -0.08 |
| NM_003613    | CILP      | -0.08 | NM_003938 | AP3D1        | -0.08 |
| NM_004784    | NDST3     | -0.08 | NM_014811 | KIAA0649     | -0.08 |
| NM_006869    | CENTA1    | -0.08 | NM_015265 | SATB2        | -0.08 |
| NM_022044    | SDF2L1    | -0.08 | NM_012192 | FXC1         | -0.08 |
| NM_014047    | HSPC023   | -0.08 | NM_014464 | TINAG        | -0.08 |
| NM_014506    | TOR1B     | -0.08 | NM_014549 | DKFZP434P211 | -0.08 |
| NM_016423    | ZNF219    | -0.08 | NM_016947 | C6ORF48      | -0.08 |
| NM_144564    | SLC39A3   | -0.08 | NM_016116 | ASB4         | -0.08 |
| NM_019001    | 37135     | -0.08 | NM_017907 | FLJ20625     | -0.08 |
| NM_016143    | NSFL1C    | -0.08 | XM_166523 | TTYH3        | -0.08 |
| NM_025155    | FLJ11848  | -0.08 | NM_030772 | GJA10        | -0.08 |
| NM_031304    | MGC4293   | -0.08 | NM_031469 | SH3BGRL2     | -0.08 |
| NM_032123    | KIRREL2   | -0.08 | NM_032608 | MYO18B       | -0.08 |
| NM_032347    | ZNF397    | -0.08 | NM_032510 | PARD6G       | -0.08 |
| NM_032854    | FLJ14871  | -0.08 | NM_032380 | EFG2         | -0.08 |
| NM_033130    | SIGLEC10  | -0.08 | XM_054951 | GALNT13      | -0.08 |
| NM_053283    | DCD       | -0.08 | NM_178814 | AP1S3        | -0.08 |
| NM_153216    | FLJ25680  | -0.08 | NM_145049 | MGC10067     | -0.08 |

|              |               |       |           |           |       |
|--------------|---------------|-------|-----------|-----------|-------|
| NM_152369    | MGC45474      | -0.08 | NM_199511 | URB       | -0.08 |
| NM_145912    | NFAM1         | -0.08 | NM_144702 | FLJ32884  | -0.08 |
| NM_145307    | PLEKHK1       | -0.08 | NM_152738 | MGC40222  | -0.08 |
| NM_018325    | C9ORF72       | -0.08 | NM_152784 | MGC39581  | -0.08 |
| NM_182607    | MGC44287      | -0.08 | NM_178315 | FLJ39582  | -0.08 |
| NM_198512    | FLJ25989      | -0.08 | NM_015153 | PHF3      | -0.08 |
| NM_020467    | LOC57228      | -0.08 | NM_207424 | FLJ40536  | -0.08 |
| XM_059132    | LOC127309     | -0.08 | XM_290660 | LOC339003 | -0.08 |
| XM_293943    | LOC340096     | -0.08 | XM_293342 | LOC347424 | -0.08 |
| XM_209889    | LOC286076     | -0.08 | XM_378925 | LOC400800 | -0.08 |
| XM_377880    | LOC402203     | -0.08 | XM_379838 | LOC402505 | -0.08 |
| XM_374787    | LOC399747     | -0.08 | XM_373451 | LOC387647 | -0.08 |
| XM_370665    | LOC387820     | -0.08 | XM_378743 | LOC400647 | -0.08 |
| NM_001004334 | GPR158L1      | -0.08 | XM_378156 | LOC402436 | -0.08 |
| NM_172194    | OR4Q3         | -0.08 | NM_206967 | MGC17624  | -0.08 |
| NM_004064    | CDKN1B        | -0.07 | NM_018440 | PAG       | -0.07 |
| NM_007118    | TRIO          | -0.07 | NM_000634 | IL8RA     | -0.07 |
| NM_002959    | SORT1         | -0.07 | NM_006192 | PAX1      | -0.07 |
| NM_004741    | NOLC1         | -0.07 | NM_004474 | FOXD2     | -0.07 |
| NM_002040    | GABPA         | -0.07 | NM_021163 | RBAK      | -0.07 |
| NM_000538    | RFXAP         | -0.07 | NM_018488 | TBX4      | -0.07 |
| NM_002629    | PGAM1         | -0.07 | NM_007171 | POMT1     | -0.07 |
| NM_004550    | NDUFS2        | -0.07 | NM_004615 | TM4SF2    | -0.07 |
| NM_002839    | PTPRD         | -0.07 | NM_017636 | TRPM4     | -0.07 |
| NM_000605    | IFNA2         | -0.07 | NM_005691 | ABCC9     | -0.07 |
| NM_002007    | FGF4          | -0.07 | NM_001066 | TNFRSF1B  | -0.07 |
| NM_002252    | KCNS3         | -0.07 | NM_004323 | BAG1      | -0.07 |
| NM_032124    | DKFZP564D1378 | -0.07 | NM_152622 | FLJ35954  | -0.07 |
| NM_021973    | HAND2         | -0.07 | NM_002165 | ID1       | -0.07 |
| NM_014891    | PDAP1         | -0.07 | NM_145040 | PRKCDBP   | -0.07 |
| NM_006861    | RAB35         | -0.07 | NM_003082 | SNAPC1    | -0.07 |
| NM_005634    | SOX3          | -0.07 | NM_000850 | GSTM4     | -0.07 |
| NM_004130    | GYG           | -0.07 | NM_001467 | SLC37A4   | -0.07 |
| NM_004121    | GGTLA1        | -0.07 | NM_002797 | PSMB5     | -0.07 |
| NM_032360    | ACBD6         | -0.07 | NM_005664 | MKRN3     | -0.07 |
| NM_005674    | ZNF239        | -0.07 | NM_003536 | HIST1H3H  | -0.07 |
| NM_005423    | TFF2          | -0.07 | NM_004639 | BAT3      | -0.07 |
| NM_030664    | PTER          | -0.07 | NM_014793 | LCMT2     | -0.07 |
| NM_014835    | OSBPL2        | -0.07 | NM_014772 | KIAA0427  | -0.07 |
| NM_002510    | GPNMB         | -0.07 | XM_496278 | ZNF516    | -0.07 |
| NM_006808    | SEC61B        | -0.07 | XM_291291 | DDHD2     | -0.07 |
| NM_015525    | IBTK          | -0.07 | NM_014055 | CDV-1     | -0.07 |
| NM_014412    | SIP           | -0.07 | NM_016215 | EGFL7     | -0.07 |
| NM_017738    | C9ORF39       | -0.07 | NM_017658 | BTBD5     | -0.07 |
| NM_017875    | FLJ20551      | -0.07 | NM_020374 | C12ORF4   | -0.07 |
| NM_019896    | POLE4         | -0.07 | NM_015455 | KIAA1194  | -0.07 |

|           |               |       |           |           |       |
|-----------|---------------|-------|-----------|-----------|-------|
| XM_036299 | KIAA1522      | -0.07 | NM_022373 | FLJ22313  | -0.07 |
| NM_022736 | FLJ14153      | -0.07 | NM_022769 | TORC3     | -0.07 |
| NM_024518 | ULBP3         | -0.07 | NM_030922 | NIPA2     | -0.07 |
| NM_032154 | PCGF6         | -0.07 | NM_031429 | RTBDN     | -0.07 |
| XM_376656 | MYH16         | -0.07 | NM_032041 | NCALD     | -0.07 |
| NM_032257 | ZMYND12       | -0.07 | NM_032572 | RNASE7    | -0.07 |
| NM_032783 | FLJ14431      | -0.07 | NM_033546 | MRLC2     | -0.07 |
| NM_033089 | C20ORF99      | -0.07 | NM_138300 | PYGO2     | -0.07 |
| XM_370870 | MGC4809       | -0.07 | NM_145236 | B3GNT7    | -0.07 |
| XM_291105 | MGC21874      | -0.07 | NM_145267 | C6ORF57   | -0.07 |
| NM_153833 | H1FOO         | -0.07 | NM_152442 | RAD9B     | -0.07 |
| NM_173498 | DKFZP434C0631 | -0.07 | NM_153219 | ZNF524    | -0.07 |
| NM_181780 | BTLA          | -0.07 | NM_138279 | BNIP1     | -0.07 |
| NM_152702 | C9ORF94       | -0.07 | NM_145063 | C6ORF130  | -0.07 |
| NM_145060 | C18ORF24      | -0.07 | NM_175076 | C8ORF15   | -0.07 |
| NM_173810 | MGC29649      | -0.07 | NM_175062 | RASGEF1C  | -0.07 |
| XM_171410 | DKFZP667B0210 | -0.07 | NM_173813 | FLJ34154  | -0.07 |
| NM_173825 | RABL3         | -0.07 | XM_378514 | LOC283663 | -0.07 |
| NM_182584 | FLJ33706      | -0.07 | XM_378606 | LOC283867 | -0.07 |
| NM_205864 | CTAG3         | -0.07 | XM_295155 | LOC340094 | -0.07 |
| NM_182595 | DKFZP564N2472 | -0.07 | NM_181612 | KRTAP19-6 | -0.07 |
| NM_003760 | EIF4G3        | -0.07 | NM_207443 | FLJ45244  | -0.07 |
| NM_207452 | FLJ45200      | -0.07 | XM_293042 | LOC344423 | -0.07 |
| XM_295059 | LOC339771     | -0.07 | XM_117257 | LOC200624 | -0.07 |
| XM_087141 | LOC151256     | -0.07 | XM_351723 | LOC375593 | -0.07 |
| XM_374071 | LOC389189     | -0.07 | XM_376305 | LOC401121 | -0.07 |
| XM_377109 | LOC401638     | -0.07 | XM_373506 | LOC387784 | -0.07 |
| XM_378747 | LOC400651     | -0.07 | NM_153273 | IHPK1     | -0.06 |
| NM_006256 | PRKCL2        | -0.06 | NM_145185 | MAP2K7    | -0.06 |
| NM_007369 | GPR161        | -0.06 | NM_006174 | NPY5R     | -0.06 |
| NM_005631 | SMO           | -0.06 | NM_176882 | TAS2R40   | -0.06 |
| NM_004322 | BAD           | -0.06 | NM_012323 | MAFF      | -0.06 |
| NM_018906 | PCDHA3        | -0.06 | NM_004292 | RIN1      | -0.06 |
| NM_006094 | DLC1          | -0.06 | NM_057179 | TWIST2    | -0.06 |
| NM_000159 | GCDH          | -0.06 | NM_000363 | TNNI3     | -0.06 |
| NM_005992 | TBX1          | -0.06 | NM_000372 | TYR       | -0.06 |
| NM_018961 | UBASH3A       | -0.06 | NM_005084 | PLA2G7    | -0.06 |
| NM_007037 | ADAMTS8       | -0.06 | NM_005355 | KIF25     | -0.06 |
| NM_000410 | HFE           | -0.06 | NM_004758 | BZRAP1    | -0.06 |
| NM_014452 | TNFRSF21      | -0.06 | NM_145068 | TRPV3     | -0.06 |
| NM_006858 | IL1RL1LG      | -0.06 | NM_014978 | SORCS3    | -0.06 |
| NM_005191 | CD80          | -0.06 | NM_000812 | GABRB1    | -0.06 |
| NM_002060 | GJA4          | -0.06 | NM_003060 | SLC22A5   | -0.06 |
| NM_002614 | PDZK1         | -0.06 | NM_033027 | AXUD1     | -0.06 |
| NM_012110 | CHIC2         | -0.06 | NM_013263 | BRD7      | -0.06 |
| NM_024817 | FLJ13710      | -0.06 | NM_002281 | KRTHB1    | -0.06 |

|              |           |       |              |           |       |
|--------------|-----------|-------|--------------|-----------|-------|
| NM_006152    | LRMP      | -0.06 | NM_002690    | POLB      | -0.06 |
| NM_006283    | TACC1     | -0.06 | NM_021000    | PTTG3     | -0.06 |
| NM_183357    | ADCY5     | -0.06 | NM_004057    | CALB3     | -0.06 |
| NM_004398    | DDX10     | -0.06 | NR_001435    | HLA-DPB2  | -0.06 |
| NM_024501    | HOXD1     | -0.06 | NM_006196    | PCBP1     | -0.06 |
| NM_002408    | MGAT2     | -0.06 | NM_002668    | PLP2      | -0.06 |
| NM_020683    | AD026     | -0.06 | NM_003274    | TMEM1     | -0.06 |
| NM_003164    | STX5A     | -0.06 | NM_003631    | PARG      | -0.06 |
| NM_004923    | MTL5      | -0.06 | XM_113947    | KIAA0565  | -0.06 |
| NM_005740    | DNAL4     | -0.06 | NM_014848    | SV2B      | -0.06 |
| NM_014864    | FAM20B    | -0.06 | XM_031553    | SR140     | -0.06 |
| NM_012467    | TPSG1     | -0.06 | NM_015439    | C6ORF80   | -0.06 |
| NM_012417    | PITPNC1   | -0.06 | NM_014498    | GOLPH4    | -0.06 |
| NM_016073    | HDGFRP3   | -0.06 | NM_017550    | KIAA1193  | -0.06 |
| NM_058186    | FAM3B     | -0.06 | NM_016207    | CPSF3     | -0.06 |
| NM_017794    | KIAA1797  | -0.06 | NM_018130    | FLJ10539  | -0.06 |
| NM_018090    | FLJ10420  | -0.06 | NM_018676    | THSD1     | -0.06 |
| NM_020181    | C14ORF162 | -0.06 | NM_021185    | C19ORF15  | -0.06 |
| NM_022746    | FLJ22390  | -0.06 | NM_023112    | OTUB2     | -0.06 |
| NM_024323    | MGC11271  | -0.06 | NM_033467    | MMEL2     | -0.06 |
| NM_024942    | C10ORF88  | -0.06 | NM_025218    | ULBP1     | -0.06 |
| NM_024909    | C6ORF134  | -0.06 | NM_032331    | MGC2408   | -0.06 |
| NM_080666    | C14ORF150 | -0.06 | XM_032304    | LOC90525  | -0.06 |
| NM_133636    | HEL308    | -0.06 | NM_148897    | SDR-O     | -0.06 |
| XM_043739    | LOC92235  | -0.06 | NM_153035    | FLJ32112  | -0.06 |
| NM_182510    | FLJ32252  | -0.06 | NM_144664    | MGC33371  | -0.06 |
| NM_198078    | C21ORF121 | -0.06 | NM_138814    | LOC150379 | -0.06 |
| NM_172366    | FBXO16    | -0.06 | NM_133462    | TTC14     | -0.06 |
| NM_145288    | ZNF342    | -0.06 | NM_145000    | FLJ25422  | -0.06 |
| NM_198471    | FLJ46061  | -0.06 | XM_375449    | LOC284106 | -0.06 |
| NM_182760    | SUMF1     | -0.06 | NM_181725    | FLJ12760  | -0.06 |
| NM_178538    | LOC338799 | -0.06 | NM_198947    | CANP      | -0.06 |
| NM_207486    | FLJ44076  | -0.06 | XM_209252    | LOC284546 | -0.06 |
| XM_291075    | LOC339926 | -0.06 | XM_292723    | LOC342933 | -0.06 |
| XM_087761    | LOC153770 | -0.06 | XM_209918    | LOC286151 | -0.06 |
| XM_377558    | LOC401937 | -0.06 | XM_376281    | LOC401097 | -0.06 |
| XM_376314    | LOC401125 | -0.06 | XM_373559    | LOC387905 | -0.06 |
| XM_378512    | LOC400369 | -0.06 | XM_378325    | LOC399978 | -0.06 |
| XM_378646    | LOC400571 | -0.06 | NM_001002907 | OR8K1     | -0.06 |
| NM_001004054 | POTE2     | -0.06 | NM_003646    | DGKZ      | -0.05 |
| XM_031612    | EIF2AK4   | -0.05 | NM_006909    | RASGRF2   | -0.05 |
| NM_001974    | EMR1      | -0.05 | NM_001735    | C5        | -0.05 |
| NM_005795    | CALCRL    | -0.05 | NM_144733    | GPR73L1   | -0.05 |
| NM_000139    | MS4A2     | -0.05 | NM_018949    | GPR14     | -0.05 |
| NM_003835    | RGS9      | -0.05 | NM_001231    | CASQ1     | -0.05 |
| NM_032390    | MKI67IP   | -0.05 | NM_000251    | MSH2      | -0.05 |

|           |           |       |              |           |       |
|-----------|-----------|-------|--------------|-----------|-------|
| NM_014239 | EIF2B2    | -0.05 | NM_006885    | ATBF1     | -0.05 |
| NM_005144 | HR        | -0.05 | NM_000098    | CPT2      | -0.05 |
| NM_172238 | TFAP2BL1  | -0.05 | NM_001190    | BCAT2     | -0.05 |
| NM_018044 | WBSCR20A  | -0.05 | NM_002775    | PRSS11    | -0.05 |
| NM_004401 | DFFA      | -0.05 | NM_004145    | MYO9B     | -0.05 |
| NM_002885 | RAP1GA1   | -0.05 | NM_001615    | ACTG2     | -0.05 |
| NM_015906 | TRIM33    | -0.05 | NM_004652    | USP9X     | -0.05 |
| NM_012125 | CHRM5     | -0.05 | NM_002355    | M6PR      | -0.05 |
| NM_002779 | PSD       | -0.05 | NM_015319    | TENC1     | -0.05 |
| NM_016562 | TLR7      | -0.05 | NM_005430    | WNT1      | -0.05 |
| NM_014862 | ARNT2     | -0.05 | NM_000475    | NR0B1     | -0.05 |
| NM_005654 | NR2F1     | -0.05 | NM_002293    | LAMC1     | -0.05 |
| NM_003154 | STATH     | -0.05 | NM_000092    | COL4A4    | -0.05 |
| NM_003797 | EED       | -0.05 | NM_020952    | TRPM3     | -0.05 |
| NM_080476 | CDC91L1   | -0.05 | NM_019061    | PIP3AP    | -0.05 |
| NM_017784 | OSBPL10   | -0.05 | NM_006695    | RPIP8     | -0.05 |
| NM_003061 | SLIT1     | -0.05 | NM_001423    | EMP1      | -0.05 |
| NM_005896 | IDH1      | -0.05 | NM_004396    | DDX5      | -0.05 |
| NM_021063 | HIST1H2BD | -0.05 | NM_152713    | ITM1      | -0.05 |
| NM_001926 | DEFA6     | -0.05 | NM_012335    | MYO1F     | -0.05 |
| NM_004533 | MYBPC2    | -0.05 | NM_020132    | AGPAT3    | -0.05 |
| NM_006905 | PSG1      | -0.05 | NM_003087    | SNCG      | -0.05 |
| NM_005410 | SEPP1     | -0.05 | NM_001005478 | GGNBP1    | -0.05 |
| NM_012080 | FAM16AX   | -0.05 | XM_375247    | ZNF592    | -0.05 |
| NM_014824 | FCHSD2    | -0.05 | NM_014730    | KIAA0152  | -0.05 |
| XM_291106 | KIAA0232  | -0.05 | NM_014752    | KIAA0102  | -0.05 |
| NM_007231 | SLC6A14   | -0.05 | NM_015464    | SOSTDC1   | -0.05 |
| NM_012263 | TTL1      | -0.05 | NM_015364    | LY96      | -0.05 |
| NM_013301 | HSU79303  | -0.05 | NM_016503    | MRPL30    | -0.05 |
| NM_017941 | HLC-8     | -0.05 | XM_372231    | FLJ20105  | -0.05 |
| NM_017840 | MRPL16    | -0.05 | NM_017691    | FLJ20156  | -0.05 |
| NM_017851 | FLJ20509  | -0.05 | NM_018666    | SAGE1     | -0.05 |
| NM_018491 | LOC55871  | -0.05 | NM_020409    | MRPL47    | -0.05 |
| NM_020422 | LOC57146  | -0.05 | NM_018728    | MYO5C     | -0.05 |
| NM_018847 | KIAA1354  | -0.05 | NM_020340    | KIAA1244  | -0.05 |
| NM_031895 | CACNG8    | -0.05 | NM_021217    | ZNF77     | -0.05 |
| NM_022758 | C6ORF106  | -0.05 | NM_033067    | DMRTB1    | -0.05 |
| NM_022120 | OXCT2     | -0.05 | NM_024034    | GDAP1L1   | -0.05 |
| NM_025244 | TSGA10    | -0.05 | NM_025189    | ZNF430    | -0.05 |
| NM_025041 | FLJ22173  | -0.05 | NM_032038    | SPINL     | -0.05 |
| NM_032044 | REG4      | -0.05 | NM_031479    | INHBE     | -0.05 |
| NM_032596 | C9ORF24   | -0.05 | NM_207308    | LOC91181  | -0.05 |
| XM_370767 | C14ORF46  | -0.05 | NM_130784    | C10ORF94  | -0.05 |
| NM_144578 | C14ORF32  | -0.05 | NM_145262    | GLYCTK    | -0.05 |
| XM_379196 | LOC151877 | -0.05 | NM_139174    | LOC161931 | -0.05 |
| NM_130772 | S100Z     | -0.05 | NM_173535    | CLECSF13  | -0.05 |

|              |           |       |              |                 |       |
|--------------|-----------|-------|--------------|-----------------|-------|
| NM_024852    | EIF2C3    | -0.05 | XM_113625    | LOC195977       | -0.05 |
| NM_139284    | LGI4      | -0.05 | XM_093024    | LOC169981       | -0.05 |
| NM_152644    | FAM24B    | -0.05 | XM_113871    | LOC197350       | -0.05 |
| NM_174918    | LOC199675 | -0.05 | NM_145659    | IL27            | -0.05 |
| NM_198151    | LOC253012 | -0.05 | NM_147195    | FLJ35740        | -0.05 |
| NM_175854    | PAN3      | -0.05 | NM_173611    | FLJ38426        | -0.05 |
| XM_209413    | LOC284912 | -0.05 | XM_295270    | LOC340581       | -0.05 |
| NM_003522    | HIST1H2BF | -0.05 | NM_203454    | MGC26594        | -0.05 |
| XM_376622    | LOC401361 | -0.05 | XM_373094    | LOC391817       | -0.05 |
| XM_377956    | LOC402286 | -0.05 | XM_374260    | LOC389641       | -0.05 |
| XM_373478    | LOC387717 | -0.05 | XM_373583    | LOC387974       | -0.05 |
| XM_372424    | LOC390233 | -0.05 | XM_372307    | LOC389950       | -0.05 |
| XM_370718    | LOC387914 | -0.05 | XM_378783    | LOC400680       | -0.05 |
| NM_001004326 | FLJ16331  | -0.05 | NM_001001872 | C14ORF37        | -0.05 |
| XM_372224    | LOC389860 | -0.05 | NM_172089    | TNFSF12-TNFSF13 | -0.05 |
| NM_002314    | LIMK1     | -0.04 | NM_016557    | CCRL1           | -0.04 |
| NM_000957    | PTGER3    | -0.04 | NM_014565    | OR1A1           | -0.04 |
| NM_002411    | SCGB2A2   | -0.04 | NM_152860    | SP7             | -0.04 |
| NM_002015    | FOXO1A    | -0.04 | NM_024503    | HIVEP3          | -0.04 |
| NM_000063    | C2        | -0.04 | NM_015989    | CSAD            | -0.04 |
| NM_001912    | CTSL      | -0.04 | NM_022060    | ABHD4           | -0.04 |
| NM_006395    | APG7L     | -0.04 | NM_000182    | HADHA           | -0.04 |
| NM_005908    | MANBA     | -0.04 | NM_002021    | FMO1            | -0.04 |
| NM_001698    | AUH       | -0.04 | NM_004879    | EI24            | -0.04 |
| XM_030577    | ATP9A     | -0.04 | NM_003909    | CPNE3           | -0.04 |
| NM_007368    | RASA3     | -0.04 | NM_017778    | WHSC1L1         | -0.04 |
| NM_207111    | TRIAD3    | -0.04 | NM_003807    | TNFSF14         | -0.04 |
| NM_001525    | HCRTR1    | -0.04 | NM_018646    | TRPV6           | -0.04 |
| NM_002673    | PLXNB1    | -0.04 | NM_000810    | GABRA5          | -0.04 |
| NM_005123    | NR1H4     | -0.04 | NM_001646    | APOC4           | -0.04 |
| NM_004425    | ECM1      | -0.04 | NM_001640    | APEH            | -0.04 |
| NM_020980    | AQP9      | -0.04 | NM_002267    | KPNA3           | -0.04 |
| NM_000668    | ADH1B     | -0.04 | NM_003914    | CCNA1           | -0.04 |
| NM_003772    | JRKL      | -0.04 | NM_007250    | KLF8            | -0.04 |
| NM_001995    | ACSL1     | -0.04 | NM_000466    | PEX1            | -0.04 |
| NM_018256    | WDR12     | -0.04 | NM_004906    | WTAP            | -0.04 |
| NM_004047    | ATP6V0B   | -0.04 | NM_001424    | EMP2            | -0.04 |
| NM_002084    | GPX3      | -0.04 | NM_002018    | FLII            | -0.04 |
| NM_002278    | KRTHA2    | -0.04 | NM_006188    | OCM             | -0.04 |
| NM_024410    | ODF1      | -0.04 | NM_002722    | PPY             | -0.04 |
| NM_018308    | ACOXL     | -0.04 | NM_003040    | SLC4A2          | -0.04 |
| NM_024105    | ALG12     | -0.04 | NM_002901    | RCN1            | -0.04 |
| NM_003115    | UAP1      | -0.04 | NM_003294    | TPSB1           | -0.04 |
| NM_004604    | STX4A     | -0.04 | NM_007269    | STXBP3          | -0.04 |
| NM_004870    | MPDU1     | -0.04 | NM_003717    | NPFF            | -0.04 |
| NM_014761    | KIAA0174  | -0.04 | NM_007075    | WDRX1           | -0.04 |

|              |              |       |           |           |       |
|--------------|--------------|-------|-----------|-----------|-------|
| NM_006843    | SDS          | -0.04 | NM_007238 | PXMP4     | -0.04 |
| NM_006578    | GNB5         | -0.04 | NM_015323 | KIAA0776  | -0.04 |
| NM_015540    | RPAP1        | -0.04 | NM_014062 | NOB1P     | -0.04 |
| NM_015654    | DKFZP564C103 | -0.04 | NM_015660 | GIMAP2    | -0.04 |
| NM_016931    | NOX4         | -0.04 | NM_016141 | DNCL1     | -0.04 |
| NM_053039    | UGT2B28      | -0.04 | NM_019067 | FLJ10613  | -0.04 |
| NM_017759    | FLJ20309     | -0.04 | NM_018081 | FLJ10385  | -0.04 |
| NM_017665    | ZCCHC10      | -0.04 | NM_017895 | DDX27     | -0.04 |
| NM_020161    | DKFZP547H025 | -0.04 | NM_021061 | ZNF647    | -0.04 |
| NM_020713    | KIAA1196     | -0.04 | NM_022459 | XPO4      | -0.04 |
| NM_022785    | FLJ23588     | -0.04 | NM_023931 | MGC2474   | -0.04 |
| NM_031898    | TEKT3        | -0.04 | NM_022900 | CAS1      | -0.04 |
| NM_024040    | CUEDC2       | -0.04 | NM_024666 | FLJ11506  | -0.04 |
| NM_024588    | FLJ23584     | -0.04 | NM_024825 | FLJ23447  | -0.04 |
| NM_031424    | C20ORF55     | -0.04 | NM_198179 | GPR103    | -0.04 |
| NM_032801    | JAM3         | -0.04 | NM_032116 | KATNAL1   | -0.04 |
| NM_032772    | ZNF503       | -0.04 | XM_045086 | KIAA1764  | -0.04 |
| NM_033468    | ZNF257       | -0.04 | NM_152264 | SLC39A13  | -0.04 |
| NM_053002    | TRALPUSH     | -0.04 | NM_080753 | WFDC10A   | -0.04 |
| NM_144661    | C10ORF82     | -0.04 | NM_152480 | C19ORF23  | -0.04 |
| NM_152791    | ZNF555       | -0.04 | NM_173517 | VKORC1L1  | -0.04 |
| XM_097977    | LOC150946    | -0.04 | NM_145296 | IGSF4C    | -0.04 |
| XM_290922    | MGC27277     | -0.04 | NM_145300 | LOC200420 | -0.04 |
| NM_145111    | DKFZP727G131 | -0.04 | NM_173551 | SAMD6     | -0.04 |
| NM_172240    | TUWD12       | -0.04 | XM_378238 | LOC283050 | -0.04 |
| NM_173570    | ZDHHC23      | -0.04 | XM_173083 | LOC255025 | -0.04 |
| NM_194309    | C21ORF125    | -0.04 | NM_182566 | LOC284013 | -0.04 |
| XM_379430    | LOC285758    | -0.04 | NM_207362 | MGC42367  | -0.04 |
| NM_198564    | FLJ44290     | -0.04 | NM_198079 | FLJ40113  | -0.04 |
| XM_371237    | CATSPER4     | -0.04 | NM_203308 | MGC34774  | -0.04 |
| NM_207436    | FLJ42957     | -0.04 | XM_293034 | LOC344405 | -0.04 |
| XM_171154    | LOC253883    | -0.04 | XM_378894 | LOC400778 | -0.04 |
| XM_374115    | LOC389273    | -0.04 | XM_379273 | LOC401149 | -0.04 |
| XM_371851    | LOC389432    | -0.04 | XM_374185 | LOC389437 | -0.04 |
| XM_379482    | LOC401320    | -0.04 | XM_377834 | LOC402167 | -0.04 |
| XM_372416    | LOC390205    | -0.04 | XM_378299 | LOC399919 | -0.04 |
| XM_372441    | LOC390271    | -0.04 | XM_378757 | LOC400659 | -0.04 |
| XM_371397    | LOC388795    | -0.04 | XM_377071 | LOC401622 | -0.04 |
| NM_001005516 | OR5K3        | -0.04 | NM_004677 | XKRY      | -0.04 |
| NM_032910    | C21ORF119    | -0.04 | NM_000142 | FGFR3     | -0.03 |
| XM_290516    | HSMDPKIN     | -0.03 | NM_002576 | PAK1      | -0.03 |
| NM_002595    | PCTK2        | -0.03 | NM_003690 | PRKRA     | -0.03 |
| NM_002419    | MAP3K11      | -0.03 | NM_002054 | GCG       | -0.03 |
| NM_004382    | CRHR1        | -0.03 | NM_000322 | RDS       | -0.03 |
| NM_000871    | HTR6         | -0.03 | NM_016944 | TAS2R4    | -0.03 |
| NM_006352    | ZNF238       | -0.03 | NM_001642 | APLP2     | -0.03 |



|           |           |       |           |          |       |
|-----------|-----------|-------|-----------|----------|-------|
| NM_021193 | HOXD12    | -0.03 | NM_002698 | POU2F2   | -0.03 |
| NM_001454 | FOXJ1     | -0.03 | NM_016531 | KLF3     | -0.03 |
| NM_003030 | SHOX2     | -0.03 | NM_002624 | PFDN5    | -0.03 |
| NM_002636 | PHF1      | -0.03 | NM_024527 | ABHD8    | -0.03 |
| NM_201252 | AFAR3     | -0.03 | NM_000398 | DIA1     | -0.03 |
| NM_017902 | HIF1AN    | -0.03 | NM_020300 | MGST1    | -0.03 |
| NM_000817 | GAD1      | -0.03 | NM_000045 | ARG1     | -0.03 |
| NM_004826 | ECEL1     | -0.03 | NM_005420 | SULT1E1  | -0.03 |
| NM_002870 | RAB13     | -0.03 | NM_000544 | TAP2     | -0.03 |
| NM_004905 | PRDX6     | -0.03 | NM_017670 | OTUB1    | -0.03 |
| NM_021102 | SPINT2    | -0.03 | NM_012144 | DNAI1    | -0.03 |
| NM_004238 | TRIP12    | -0.03 | NM_004619 | TRAF5    | -0.03 |
| NM_145021 | MIR       | -0.03 | NM_018643 | TREM1    | -0.03 |
| NM_002190 | IL17      | -0.03 | NM_002996 | CX3CL1   | -0.03 |
| NM_000894 | LHB       | -0.03 | NM_006172 | NPPA     | -0.03 |
| NM_001668 | ARNT      | -0.03 | NM_005234 | NR2F6    | -0.03 |
| NM_006186 | NR4A2     | -0.03 | NM_006059 | LAMC3    | -0.03 |
| NM_004706 | ARHGEF1   | -0.03 | NM_024009 | GJB3     | -0.03 |
| NM_001788 | CDC10     | -0.03 | NM_000371 | TTR      | -0.03 |
| NM_002871 | RABIF     | -0.03 | NM_006698 | BLCAP    | -0.03 |
| NM_001344 | DAD1      | -0.03 | NM_020188 | DC13     | -0.03 |
| NM_006708 | GLO1      | -0.03 | NM_002129 | HMGB2    | -0.03 |
| NM_004456 | EZH2      | -0.03 | NM_024316 | LENG1    | -0.03 |
| NM_183003 | COX7A3    | -0.03 | NM_005530 | IDH3A    | -0.03 |
| NM_004220 | ZNF213    | -0.03 | NM_004605 | SULT2B1  | -0.03 |
| NM_021030 | ZNF14     | -0.03 | NM_003959 | HIP1R    | -0.03 |
| NM_012262 | HS2ST1    | -0.03 | NM_003829 | MPDZ     | -0.03 |
| NM_005116 | SLC23A2   | -0.03 | NM_172201 | KCNE2    | -0.03 |
| NM_005482 | PIGK      | -0.03 | NM_005724 | TM4SF8   | -0.03 |
| XM_032719 | CARM1     | -0.03 | NM_016348 | C5ORF4   | -0.03 |
| NM_006551 | SCGB1D2   | -0.03 | NM_015115 | KIAA0276 | -0.03 |
| NM_015141 | KIAA0089  | -0.03 | XM_030524 | SLC9A8   | -0.03 |
| NM_207303 | ATRNL1    | -0.03 | NM_019844 | SLCO1B3  | -0.03 |
| NM_205859 | OR2K2     | -0.03 | NM_016500 | CXORF26  | -0.03 |
| NM_014593 | CXXC1     | -0.03 | NM_015911 | LOC51058 | -0.03 |
| NM_019021 | FLJ20010  | -0.03 | NM_017446 | MRPL39   | -0.03 |
| NM_016485 | C6ORF55   | -0.03 | NM_018374 | FLJ11273 | -0.03 |
| NM_019095 | C20ORF155 | -0.03 | NM_017549 | UCC1     | -0.03 |
| NM_017760 | MTB       | -0.03 | NM_017785 | FLJ20364 | -0.03 |
| NM_018151 | RIF1      | -0.03 | NM_018029 | FLJ10213 | -0.03 |
| NM_017619 | FLJ25070  | -0.03 | NM_018462 | C3ORF10  | -0.03 |
| NM_022908 | FLJ12442  | -0.03 | NM_022745 | ATPAF1   | -0.03 |
| NM_024063 | SPATA5L1  | -0.03 | NM_030762 | BHLHB3   | -0.03 |
| NM_024676 | FLJ22938  | -0.03 | NM_025150 | FLJ12528 | -0.03 |
| NM_024967 | ZNF556    | -0.03 | NM_031212 | SLC25A28 | -0.03 |
| NM_031286 | SH3BGRL3  | -0.03 | NM_032348 | MGC3047  | -0.03 |

|           |           |       |           |               |       |
|-----------|-----------|-------|-----------|---------------|-------|
| NM_080861 | SSB3      | -0.03 | NM_033411 | RWDD2         | -0.03 |
| NM_080667 | MGC15407  | -0.03 | NM_033386 | MIRAB13       | -0.03 |
| NM_144567 | LOC90806  | -0.03 | NM_145042 | MGC16703      | -0.03 |
| NM_033191 | KRTAP9-4  | -0.03 | NM_145037 | MGC15606      | -0.03 |
| NM_052892 | PKD1L2    | -0.03 | NM_052961 | SLC26A8       | -0.03 |
| NM_144593 | RHEBL1    | -0.03 | NM_182970 | RIMS4         | -0.03 |
| NM_080874 | ASB5      | -0.03 | NM_024087 | ASB9          | -0.03 |
| NM_173795 | FLJ32096  | -0.03 | NM_174912 | FLJ31204      | -0.03 |
| NM_174901 | FAM9C     | -0.03 | NM_181712 | LOC163782     | -0.03 |
| NM_152630 | MGC26999  | -0.03 | XM_376307 | DKFZP667E0512 | -0.03 |
| NM_152689 | MGC9712   | -0.03 | NM_182537 | HTR3D         | -0.03 |
| NM_174928 | LOC221143 | -0.03 | XM_378822 | LOC254099     | -0.03 |
| NM_172140 | IL29      | -0.03 | NM_173587 | RCOR2         | -0.03 |
| NM_176885 | TAS2R44   | -0.03 | NM_176889 | TAS2R49       | -0.03 |
| NM_178863 | KCTD13    | -0.03 | NM_153488 | MAGEA2B       | -0.03 |
| NM_207401 | FLJ45717  | -0.03 | NM_198476 | FLJ41131      | -0.03 |
| XM_378589 | LOC283914 | -0.03 | XM_376111 | LOC285189     | -0.03 |
| XM_375500 | MGC16597  | -0.03 | NM_175064 | WBSCR19       | -0.03 |
| NM_198514 | NHLRC2    | -0.03 | XM_114047 | LOC199882     | -0.03 |
| NM_138699 | LOC93622  | -0.03 | NM_207463 | FLJ46230      | -0.03 |
| XM_067448 | LOC131572 | -0.03 | XM_063630 | LOC123397     | -0.03 |
| XM_060952 | LOC128367 | -0.03 | XM_291704 | LOC340765     | -0.03 |
| XM_378880 | LOC400764 | -0.03 | XM_372785 | LOC391062     | -0.03 |
| XM_371674 | LOC389170 | -0.03 | XM_379263 | LOC401126     | -0.03 |
| XM_377945 | LOC402279 | -0.03 | XM_380057 | LOC402709     | -0.03 |
| XM_373311 | LOC392382 | -0.03 | XM_373509 | LOC387789     | -0.03 |
| XM_373518 | LOC387821 | -0.03 | XM_370631 | LOC387778     | -0.03 |
| XM_373569 | LOC387937 | -0.03 | XM_372412 | LOC390197     | -0.03 |
| XM_377446 | LOC401861 | -0.03 | XM_371016 | LOC388335     | -0.03 |
| XM_371145 | LOC388514 | -0.03 | NM_005665 | EVI5          | -0.03 |
| NM_144610 | FLJ25006  | -0.02 | NM_000907 | NPR2          | -0.02 |
| NM_020168 | PAK6      | -0.02 | NM_002738 | PRKCB1        | -0.02 |
| NM_025144 | LAK       | -0.02 | NM_031480 | RIOK1         | -0.02 |
| NM_030901 | OR7A17    | -0.02 | NM_000524 | HTR1A         | -0.02 |
| NM_002924 | RGS7      | -0.02 | NM_004778 | GPR44         | -0.02 |
| NM_002239 | KCNJ3     | -0.02 | NM_021153 | CDH19         | -0.02 |
| NM_003633 | ENC1      | -0.02 | NM_005041 | PRF1          | -0.02 |
| NM_012334 | MYO10     | -0.02 | NM_002999 | SDC4          | -0.02 |
| NM_003174 | SVIL      | -0.02 | NM_014795 | ZFH1B         | -0.02 |
| NM_018416 | FOXJ2     | -0.02 | NM_001537 | HSBP1         | -0.02 |
| NM_012258 | HEY1      | -0.02 | NM_005680 | TAF1B         | -0.02 |
| NM_003214 | TEAD3     | -0.02 | NM_000481 | AMT           | -0.02 |
| NM_007114 | TMF1      | -0.02 | NM_000170 | GLDC          | -0.02 |
| NM_000922 | PDE3B     | -0.02 | NM_017813 | FLJ20421      | -0.02 |
| NM_016640 | MRPS30    | -0.02 | NM_004536 | BIRC1         | -0.02 |
| NM_006659 | TUBGCP2   | -0.02 | NM_005019 | PDE1A         | -0.02 |

|           |               |       |           |          |       |
|-----------|---------------|-------|-----------|----------|-------|
| NM_031208 | DKFZP566J2046 | -0.02 | NM_015984 | UCHL5    | -0.02 |
| NM_005180 | BMI1          | -0.02 | NM_174916 | UBR1     | -0.02 |
| NM_000949 | PRLR          | -0.02 | NM_014885 | ANAPC10  | -0.02 |
| NM_000163 | GHR           | -0.02 | NM_005259 | GDF8     | -0.02 |
| NM_002172 | IFNA14        | -0.02 | NM_002195 | INSL4    | -0.02 |
| NM_177959 | DOK5          | -0.02 | NM_005059 | RLN2     | -0.02 |
| NM_004107 | FCGRT         | -0.02 | NM_012156 | EPB41L1  | -0.02 |
| NM_002275 | KRT15         | -0.02 | NM_002234 | KCNA5    | -0.02 |
| NM_001850 | COL8A1        | -0.02 | NM_152520 | ZNF533   | -0.02 |
| NM_000583 | GC            | -0.02 | NM_005143 | HP       | -0.02 |
| NM_014154 | HSPC056       | -0.02 | NM_032483 | HTPAP    | -0.02 |
| NM_001722 | POLR3D        | -0.02 | NM_018556 | SIRPB2   | -0.02 |
| NM_002966 | S100A10       | -0.02 | NM_005052 | RAC3     | -0.02 |
| NM_012236 | SCMH1         | -0.02 | NM_004069 | AP2S1    | -0.02 |
| NM_004045 | ATOX1         | -0.02 | NM_002223 | ITPR2    | -0.02 |
| NM_002277 | KRTHA1        | -0.02 | NM_004561 | OVOL1    | -0.02 |
| NM_002489 | NDUFA4        | -0.02 | NM_002640 | SERPINB8 | -0.02 |
| NM_000983 | RPL22         | -0.02 | NM_002854 | PVALB    | -0.02 |
| NM_003359 | UGDH          | -0.02 | NM_003455 | ZNF202   | -0.02 |
| NM_021140 | UTX           | -0.02 | NM_003725 | RODH     | -0.02 |
| XM_032901 | KIAA0226      | -0.02 | XM_375397 | KIAA0753 | -0.02 |
| NM_014820 | TOMM70A       | -0.02 | NM_006994 | BTN3A3   | -0.02 |
| NM_014884 | SFRS14        | -0.02 | NM_005785 | RNF41    | -0.02 |
| NM_006337 | MCRS1         | -0.02 | NM_005819 | STX6     | -0.02 |
| NM_006815 | RNP24         | -0.02 | NM_006397 | RNASEH2A | -0.02 |
| NM_007083 | NUDT6         | -0.02 | NM_006841 | SLC38A3  | -0.02 |
| NM_006700 | FLN29         | -0.02 | NM_015589 | SAMD4    | -0.02 |
| NM_014952 | BAHD1         | -0.02 | XM_028253 | C19ORF7  | -0.02 |
| NM_014319 | MAN1          | -0.02 | NM_032012 | C9ORF5   | -0.02 |
| NM_016454 | LOC51234      | -0.02 | NM_016009 | SH3GLB1  | -0.02 |
| NM_016185 | HN1           | -0.02 | NM_016256 | NAGPA    | -0.02 |
| NM_021155 | CD209         | -0.02 | NM_016353 | ZDHHC2   | -0.02 |
| NM_017891 | FLJ20584      | -0.02 | NM_017899 | TSC      | -0.02 |
| NM_017928 | FLJ20694      | -0.02 | NM_017697 | FLJ20171 | -0.02 |
| NM_017853 | DLP           | -0.02 | NM_017855 | APIN     | -0.02 |
| NM_017856 | FLJ20514      | -0.02 | NM_018362 | LIN7C    | -0.02 |
| NM_018272 | CASC1         | -0.02 | NM_018708 | FEM1A    | -0.02 |
| NM_018430 | TSNAXIP1      | -0.02 | NM_018006 | TRMT1    | -0.02 |
| NM_018467 | MDS032        | -0.02 | NM_020420 | DAZ4     | -0.02 |
| NM_020696 | KIAA1143      | -0.02 | XM_371953 | KIAA1466 | -0.02 |
| NM_021807 | SEC8L1        | -0.02 | NM_020868 | DPP10    | -0.02 |
| NM_021826 | FLJ13149      | -0.02 | NM_022912 | C2ORF23  | -0.02 |
| NM_024620 | FLJ12586      | -0.02 | NM_024636 | TNFAIP9  | -0.02 |
| NM_024522 | FLJ12650      | -0.02 | NM_024523 | GCC1     | -0.02 |
| NM_199052 | C20ORF7       | -0.02 | NM_024683 | FLJ22729 | -0.02 |
| NM_024590 | FLJ23548      | -0.02 | NM_024697 | FLJ22419 | -0.02 |

|              |           |       |              |           |       |
|--------------|-----------|-------|--------------|-----------|-------|
| NM_024958    | C20ORF98  | -0.02 | NM_031302    | LOC83468  | -0.02 |
| NM_032148    | SLC41A2   | -0.02 | NM_031935    | FIBL-6    | -0.02 |
| NM_031949    | TTL2      | -0.02 | NM_032025    | EIF2A     | -0.02 |
| NM_032250    | ANKRD20A  | -0.02 | NM_032255    | ZNF541    | -0.02 |
| NM_032410    | HOOK3     | -0.02 | NM_032308    | MGC4189   | -0.02 |
| NM_032313    | C4ORF14   | -0.02 | NM_032842    | FLJ14803  | -0.02 |
| NM_032382    | COG8      | -0.02 | NM_032563    | LCE3D     | -0.02 |
| NM_032933    | MGC11386  | -0.02 | NM_130446    | KLHL6     | -0.02 |
| NM_138357    | C10ORF42  | -0.02 | NM_153333    | MGC45400  | -0.02 |
| NM_138346    | MGC33867  | -0.02 | NM_052896    | CSMD2     | -0.02 |
| NM_052899    | KIAA1893  | -0.02 | NM_052923    | ZNF452    | -0.02 |
| NM_138441    | C6ORF150  | -0.02 | NM_080927    | DCBLD2    | -0.02 |
| NM_138335    | GNPDA2    | -0.02 | NM_144621    | ZBTB8     | -0.02 |
| NM_152417    | FLJ32370  | -0.02 | XM_085689    | KCTD11    | -0.02 |
| NM_178477    | C20ORF179 | -0.02 | NM_080552    | VIAAT     | -0.02 |
| NM_032552    | DAB2IP    | -0.02 | NM_144713    | FLJ32954  | -0.02 |
| NM_145286    | STOML3    | -0.02 | NM_144978    | FLJ32745  | -0.02 |
| NM_152728    | C18ORF20  | -0.02 | NM_173799    | FLJ39873  | -0.02 |
| NM_152709    | C10ORF24  | -0.02 | NM_152710    | C10ORF27  | -0.02 |
| NM_153325    | DEFB125   | -0.02 | NM_182551    | UNQ1849   | -0.02 |
| NM_032158    | WBSCR20C  | -0.02 | XM_211858    | LOC285359 | -0.02 |
| NM_182594    | ZNF454    | -0.02 | XM_379074    | LOC339788 | -0.02 |
| XM_292765    | ZNF404    | -0.02 | NM_178557    | FLJ37478  | -0.02 |
| NM_197965    | SOAT      | -0.02 | NM_201547    | C4ORF11   | -0.02 |
| NM_181727    | SPATA12   | -0.02 | NM_178233    | OTOP3     | -0.02 |
| NM_207368    | LOC348262 | -0.02 | NM_182627    | MGC64882  | -0.02 |
| NM_201402    | DUB3      | -0.02 | NM_207466    | FLJ46489  | -0.02 |
| XM_117152    | LOC199897 | -0.02 | NM_207511    | FLJ36268  | -0.02 |
| NM_207512    | LOC401610 | -0.02 | NM_205857    | FBI4      | -0.02 |
| XM_294778    | LOC339025 | -0.02 | XM_068889    | LOC134505 | -0.02 |
| XM_061626    | LOC119694 | -0.02 | XM_294311    | LOC346521 | -0.02 |
| XM_166916    | LOC219958 | -0.02 | XM_379191    | LOC401065 | -0.02 |
| XM_374028    | LOC389087 | -0.02 | XM_373974    | LOC388924 | -0.02 |
| XM_376267    | LOC401087 | -0.02 | XM_376051    | LOC400952 | -0.02 |
| XM_371845    | LOC389427 | -0.02 | XM_372097    | LOC389734 | -0.02 |
| XM_380036    | LOC402689 | -0.02 | XM_379851    | LOC402525 | -0.02 |
| XM_374965    | LOC400010 | -0.02 | XM_372303    | LOC389936 | -0.02 |
| XM_377343    | LOC401778 | -0.02 | XM_374885    | LOC399898 | -0.02 |
| XM_378360    | LOC400043 | -0.02 | XM_378660    | LOC400584 | -0.02 |
| XM_377426    | LOC401845 | -0.02 | XM_377529    | LOC401915 | -0.02 |
| XM_371125    | LOC388491 | -0.02 | XM_373688    | LOC388279 | -0.02 |
| NM_001004335 | FLJ42842  | -0.02 | NM_001004349 | FLJ45422  | -0.02 |
| XM_379730    | LOC401621 | -0.02 | NM_001005512 | OR4A47    | -0.02 |
| NM_001277    | CHKA      | -0.01 | NM_018423    | STYK1     | -0.01 |
| NM_031965    | GSG2      | -0.01 | NM_139158    | ALS2CR7   | -0.01 |
| NM_002969    | MAPK12    | -0.01 | XM_166086    | NRG3      | -0.01 |

|           |          |       |           |          |       |
|-----------|----------|-------|-----------|----------|-------|
| NM_002529 | NTRK1    | -0.01 | NM_005456 | MAPK8IP1 | -0.01 |
| NM_032017 | MGC4796  | -0.01 | NM_002610 | PDK1     | -0.01 |
| NM_005374 | MPP2     | -0.01 | NM_005044 | PRKX     | -0.01 |
| NM_005965 | MYLK     | -0.01 | NM_006609 | MAP3K2   | -0.01 |
| NM_002929 | GRK1     | -0.01 | NM_005012 | ROR1     | -0.01 |
| NM_004054 | C3AR1    | -0.01 | NM_004367 | CCR6     | -0.01 |
| NM_030906 | STK33    | -0.01 | NM_006056 | NMUR1    | -0.01 |
| NM_002928 | RGS16    | -0.01 | NM_020633 | VN1R1    | -0.01 |
| NM_080879 | RAB40A   | -0.01 | NM_004973 | JARID2   | -0.01 |
| NM_003299 | TRA1     | -0.01 | NM_001208 | BTF3L1   | -0.01 |
| NM_000638 | VTN      | -0.01 | NM_006276 | SFRS7    | -0.01 |
| NM_005442 | EOMES    | -0.01 | NM_014727 | MLL4     | -0.01 |
| NM_005378 | MYCN     | -0.01 | NM_022716 | PRRX1    | -0.01 |
| NM_005859 | PURA     | -0.01 | NM_003998 | NFKB1    | -0.01 |
| NM_000451 | SHOX     | -0.01 | NM_002509 | NKX2-2   | -0.01 |
| NM_004387 | NKX2-5   | -0.01 | NM_006339 | HMG20B   | -0.01 |
| NM_003079 | SMARCE1  | -0.01 | NM_003131 | SRF      | -0.01 |
| NM_003201 | TFAM     | -0.01 | NM_001911 | CTSG     | -0.01 |
| NM_003597 | TIEG2    | -0.01 | NM_000157 | GBA      | -0.01 |
| NM_015013 | AOF2     | -0.01 | NM_001935 | DPP4     | -0.01 |
| NM_012203 | GRHPR    | -0.01 | NM_000923 | PDE4C    | -0.01 |
| NM_015922 | NSDHL    | -0.01 | NM_000137 | FAH      | -0.01 |
| NM_004110 | FDXR     | -0.01 | NM_000150 | FUT6     | -0.01 |
| NM_016335 | PRODH    | -0.01 | NM_014243 | ADAMTS3  | -0.01 |
| NM_003352 | SUMO1    | -0.01 | NM_003883 | HDAC3    | -0.01 |
| NM_000531 | OTC      | -0.01 | NM_020216 | RNPEP    | -0.01 |
| NM_005914 | MCM4     | -0.01 | NM_019555 | ARHGEF3  | -0.01 |
| NM_004799 | ZFYVE9   | -0.01 | NM_030666 | SERPINB1 | -0.01 |
| NM_006217 | SERPINI2 | -0.01 | NM_016263 | FZR1     | -0.01 |
| NM_178422 | MPRA     | -0.01 | NM_000826 | GRIA2    | -0.01 |
| NM_014439 | IL1F7    | -0.01 | XM_167711 | ITGA8    | -0.01 |
| NM_000479 | AMH      | -0.01 | NM_000641 | IL11     | -0.01 |
| NM_002908 | REL      | -0.01 | NM_002855 | PVRL1    | -0.01 |
| NM_024408 | NOTCH2   | -0.01 | NM_002312 | LIG4     | -0.01 |
| NM_032737 | LMNB2    | -0.01 | NM_153212 | GJB4     | -0.01 |
| NM_001514 | GTF2B    | -0.01 | NM_015250 | BICD2    | -0.01 |
| NM_000355 | TCN2     | -0.01 | NM_002249 | KCNN3    | -0.01 |
| NM_001660 | ARF4     | -0.01 | NM_014629 | ARHGEF10 | -0.01 |
| NM_024997 | ATF7IP2  | -0.01 | NM_006356 | ATP5H    | -0.01 |
| NM_015526 | CLIPR-59 | -0.01 | NM_001920 | DCN      | -0.01 |
| NM_014503 | DRIM     | -0.01 | NM_024733 | FLJ14345 | -0.01 |
| NM_005828 | HAN11    | -0.01 | NM_002025 | FMR2     | -0.01 |
| NM_005479 | FRAT1    | -0.01 | NM_000158 | GBE1     | -0.01 |
| NM_014380 | NGFRAP1  | -0.01 | NM_014625 | NPHS2    | -0.01 |
| NM_005824 | LRRC17   | -0.01 | NM_014061 | MAGEH1   | -0.01 |
| NM_000430 | PAFAH1B1 | -0.01 | NM_006253 | PRKAB1   | -0.01 |

|           |              |       |           |          |       |
|-----------|--------------|-------|-----------|----------|-------|
| NM_000542 | SFTPBP       | -0.01 | NM_003076 | SMARCD1  | -0.01 |
| NM_001276 | CHI3L1       | -0.01 | NM_001584 | C11ORF8  | -0.01 |
| NM_001739 | CA5A         | -0.01 | NM_004341 | CAD      | -0.01 |
| NM_005170 | ASCL2        | -0.01 | NM_152296 | ATP1A3   | -0.01 |
| NM_001751 | CARS         | -0.01 | NM_001323 | CST6     | -0.01 |
| NM_001187 | BAGE         | -0.01 | NM_006736 | DNAJB2   | -0.01 |
| NM_013289 | KIR3DL1      | -0.01 | NM_002363 | MAGEB1   | -0.01 |
| NM_014945 | ABLIM3       | -0.01 | NM_014551 | 384D8-2  | -0.01 |
| NM_016453 | NCKIPSD      | -0.01 | NM_018723 | A2BP1    | -0.01 |
| NM_020380 | AF15Q14      | -0.01 | NM_020679 | AD023    | -0.01 |
| NM_006303 | JTV1         | -0.01 | NM_005656 | TMPRSS2  | -0.01 |
| NM_004751 | GCNT3        | -0.01 | NM_004727 | SLC24A1  | -0.01 |
| XM_291018 | USP34        | -0.01 | NM_005750 | C4ORF6   | -0.01 |
| NM_005783 | TXNDC9       | -0.01 | NM_006804 | STARD3   | -0.01 |
| NM_006632 | SLC17A3      | -0.01 | NM_006693 | CPSF4    | -0.01 |
| NM_006707 | BTNL3        | -0.01 | NM_007048 | BTN3A1   | -0.01 |
| XM_290502 | KIAA1030     | -0.01 | XM_042323 | CAMTA1   | -0.01 |
| XM_034086 | KIAA1107     | -0.01 | NM_015171 | XPO6     | -0.01 |
| NM_015184 | PLCL2        | -0.01 | NM_014305 | TGDS     | -0.01 |
| NM_015550 | OSBPL3       | -0.01 | NM_012399 | PITPNB   | -0.01 |
| NM_020344 | SLC24A2      | -0.01 | NM_015585 | C20ORF26 | -0.01 |
| NM_015668 | DKFZP434I092 | -0.01 | NM_017415 | KLHL3    | -0.01 |
| NM_015685 | SDCBP2       | -0.01 | NM_020727 | ZNF295   | -0.01 |
| NM_016441 | CRIM1        | -0.01 | NM_016184 | CLECSF6  | -0.01 |
| NM_015948 | SLC35B3      | -0.01 | NM_014575 | SCHIP1   | -0.01 |
| NM_016049 | C14ORF122    | -0.01 | NM_014592 | KCNIP1   | -0.01 |
| NM_016299 | HSPA14       | -0.01 | NM_139265 | EHD4     | -0.01 |
| NM_019030 | DHX29        | -0.01 | NM_058182 | C21ORF51 | -0.01 |
| NM_017910 | FLJ20628     | -0.01 | NM_018150 | C1orf164 | -0.01 |
| NM_018189 | DPPA4        | -0.01 | NM_018437 | HEMGN    | -0.01 |
| NM_020140 | EB-1         | -0.01 | NM_020154 | C15ORF24 | -0.01 |
| NM_020116 | FSTL5        | -0.01 | NM_020762 | SRGAP1   | -0.01 |
| NM_021202 | TP53INP2     | -0.01 | NM_020899 | ZBTB4    | -0.01 |
| XM_052561 | KIAA1337     | -0.01 | NM_021213 | PCTP     | -0.01 |
| NM_021947 | SRR          | -0.01 | NM_022082 | C20ORF59 | -0.01 |
| NM_201280 | MUTED        | -0.01 | NM_023014 | LOC65122 | -0.01 |
| NM_022106 | C20ORF177    | -0.01 | NM_023071 | SPATS2   | -0.01 |
| NM_022142 | ELSPBP1      | -0.01 | NM_024108 | MGC2650  | -0.01 |
| NM_024773 | FLJ13798     | -0.01 | XM_370863 | ATP8B4   | -0.01 |
| NM_024994 | FLJ12595     | -0.01 | NM_025042 | WBSCR23  | -0.01 |
| NM_024886 | C10ORF95     | -0.01 | NM_025054 | VCIP135  | -0.01 |
| NM_030795 | STMN4        | -0.01 | NM_030926 | ITM2C    | -0.01 |
| NM_030929 | KAZALD1      | -0.01 | NM_031945 | OCSP     | -0.01 |
| NM_032276 | DKFZP547E052 | -0.01 | NM_032339 | C17ORF37 | -0.01 |
| XM_378193 | MGC10981     | -0.01 | NM_153752 | C21ORF84 | -0.01 |
| NM_017528 | WBSCR22      | -0.01 | NM_147190 | LASS5    | -0.01 |

|              |               |       |              |           |       |
|--------------|---------------|-------|--------------|-----------|-------|
| NM_053051    | LIP8          | -0.01 | NM_198447    | FLJ42654  | -0.01 |
| NM_178454    | MGC54289      | -0.01 | NM_178456    | C20ORF85  | -0.01 |
| NM_145258    | MGC22773      | -0.01 | XM_060509    | S100A7L2  | -0.01 |
| NM_207321    | C10ORF129     | -0.01 | NM_144673    | CKLFSF2   | -0.01 |
| NM_145270    | LOC146325     | -0.01 | NM_022343    | C9ORF19   | -0.01 |
| NM_181644    | DKFZP761N1114 | -0.01 | NM_152557    | FLJ31413  | -0.01 |
| NM_153008    | FLJ30277      | -0.01 | XM_377742    | FBXO41    | -0.01 |
| NM_206858    | MGC87149      | -0.01 | NM_198457    | ZNF600    | -0.01 |
| NM_007139    | ZNF92         | -0.01 | NM_178502    | DTX3      | -0.01 |
| XM_352903    | FLJ30092      | -0.01 | NM_173550    | C9ORF93   | -0.01 |
| NM_139249    | MS4A6E        | -0.01 | NM_145043    | NEIL2     | -0.01 |
| NM_032251    | FLJ37970      | -0.01 | NM_152774    | MGC42090  | -0.01 |
| NM_153252    | BRODL         | -0.01 | NM_012232    | PTRF      | -0.01 |
| NM_173610    | FLJ33768      | -0.01 | NM_178530    | FLJ38379  | -0.01 |
| NM_178532    | LOC285671     | -0.01 | NM_178534    | FLJ37940  | -0.01 |
| NM_198154    | LOC339168     | -0.01 | XM_371952    | LOC340351 | -0.01 |
| NM_181605    | KRTAP6-3      | -0.01 | NM_183378    | OVCH1     | -0.01 |
| XM_375029    | LOC338862     | -0.01 | XM_291638    | LOC343070 | -0.01 |
| NM_178135    | SCDR9         | -0.01 | NM_198924    | MGC45477  | -0.01 |
| NM_182703    | LOC348094     | -0.01 | NM_207481    | FLJ34870  | -0.01 |
| NM_207483    | FLJ45964      | -0.01 | NM_201520    | FLJ40217  | -0.01 |
| NM_207497    | FLJ43752      | -0.01 | NM_203412    | LOC164153 | -0.01 |
| NM_207444    | FLJ35695      | -0.01 | NM_207513    | LOC404785 | -0.01 |
| XM_086604    | LOC149620     | -0.01 | XM_291584    | LOC343474 | -0.01 |
| XM_058719    | LOC123688     | -0.01 | XM_171855    | LOC255275 | -0.01 |
| XM_209187    | LOC284417     | -0.01 | XM_071099    | LOC138805 | -0.01 |
| XM_059830    | LOC136242     | -0.01 | XM_372812    | LOC391162 | -0.01 |
| XM_166869    | LOC219429     | -0.01 | XM_372784    | LOC391059 | -0.01 |
| XM_379156    | LOC401032     | -0.01 | XM_373817    | LOC388577 | -0.01 |
| XM_371503    | LOC388963     | -0.01 | XM_371253    | LOC388633 | -0.01 |
| XM_372779    | LOC391040     | -0.01 | XM_371641    | LOC389120 | -0.01 |
| XM_371569    | LOC389049     | -0.01 | XM_377755    | LOC402094 | -0.01 |
| XM_374051    | LOC389149     | -0.01 | XM_374170    | LOC389398 | -0.01 |
| XM_373058    | LOC391746     | -0.01 | XM_379484    | LOC401324 | -0.01 |
| XM_374096    | LOC389243     | -0.01 | XM_377934    | LOC402252 | -0.01 |
| XM_377878    | LOC402201     | -0.01 | XM_374108    | LOC389264 | -0.01 |
| XM_380135    | LOC402578     | -0.01 | XM_374281    | LOC389687 | -0.01 |
| XM_373301    | LOC392352     | -0.01 | XM_370557    | LOC387676 | -0.01 |
| XM_372447    | LOC390282     | -0.01 | XM_378538    | LOC400433 | -0.01 |
| XM_378623    | LOC400552     | -0.01 | XM_378703    | LOC400619 | -0.01 |
| XM_370984    | LOC388284     | -0.01 | XM_372643    | LOC390738 | -0.01 |
| XM_375931    | LOC400858     | -0.01 | XM_372200    | LOC389842 | -0.01 |
| XM_379065    | LOC400933     | -0.01 | NM_001003702 | FLJ43692  | -0.01 |
| NM_001006118 | RBMX1E        | -0.01 | NM_000061    | BTK       | 0     |
| NM_001827    | CKS2          | 0     | NM_145025    | C6ORF199  | 0     |
| NM_015981    | CAMK2A        | 0     | NM_003648    | DGKD      | 0     |

|           |           |   |           |          |   |
|-----------|-----------|---|-----------|----------|---|
| NM_152649 | FLJ34389  | 0 | NM_003718 | CDC2L5   | 0 |
| NM_003674 | CDK10     | 0 | NM_003160 | AURKC    | 0 |
| NM_003640 | IKBKAP    | 0 | NM_033116 | NEK9     | 0 |
| NM_003551 | NME5      | 0 | NM_006556 | PMVK     | 0 |
| NM_012324 | MAPK8IP2  | 0 | NM_020804 | PACSIN1  | 0 |
| NM_145203 | CSNK1A1L  | 0 | NM_002497 | NEK2     | 0 |
| NM_003157 | NEK4      | 0 | NM_013254 | TBK1     | 0 |
| NM_000680 | ADRA1A    | 0 | NM_003263 | TLR1     | 0 |
| NM_004230 | EDG5      | 0 | NM_001957 | EDNRA    | 0 |
| NM_003844 | TNFRSF10A | 0 | XM_371262 | ELTD1    | 0 |
| NM_013257 | SGKL      | 0 | NM_017859 | URKL1    | 0 |
| NM_005108 | XYLB      | 0 | NM_003405 | YWHAH    | 0 |
| NM_001470 | GABBR1    | 0 | NM_003857 | GALR2    | 0 |
| NM_003957 | STK29     | 0 | NM_052847 | GNG7     | 0 |
| NM_015234 | GPR116    | 0 | NM_020455 | GPR126   | 0 |
| NM_016602 | GPR2      | 0 | NM_007232 | HRH3     | 0 |
| NM_005299 | GPR31     | 0 | NM_006028 | HTR3B    | 0 |
| NM_001843 | CNTN1     | 0 | NM_001553 | IGFBP7   | 0 |
| NM_007059 | KPTN      | 0 | NM_002098 | GUCA1B   | 0 |
| NM_005348 | HSPCA     | 0 | NM_007127 | VIL1     | 0 |
| NM_004768 | SFRS11    | 0 | NM_005428 | VAV1     | 0 |
| NM_006872 | ALF       | 0 | NM_015975 | TAF9L    | 0 |
| NM_000484 | APP       | 0 | NM_018489 | ASH1L    | 0 |
| NM_005238 | ETS1      | 0 | NM_001986 | ETV4     | 0 |
| NM_000325 | PITX2     | 0 | NM_003865 | HESX1    | 0 |
| NM_002145 | HOXB2     | 0 | NM_002146 | HOXB3    | 0 |
| NM_005635 | SSX1      | 0 | NM_001609 | ACADSB   | 0 |
| NM_003403 | YY1       | 0 | NM_001227 | CASP7    | 0 |
| NM_000666 | ACY1      | 0 | NM_004661 | CDC23    | 0 |
| NM_018427 | RRN3      | 0 | NM_007022 | CYB561D2 | 0 |
| NM_000770 | CYP2C8    | 0 | NM_139214 | TGIF2LY  | 0 |
| NM_020676 | ABHD6     | 0 | NM_022126 | LHPP     | 0 |
| NM_000925 | PDHB      | 0 | NM_002402 | MEST     | 0 |
| NM_023079 | FLJ13855  | 0 | NM_001536 | HRMT1L2  | 0 |
| NM_005133 | RCE1      | 0 | NM_000050 | ASS      | 0 |
| NM_007274 | BACH      | 0 | NM_003287 | TPD52L1  | 0 |
| NM_032043 | BRIP1     | 0 | NM_000543 | SMPD1    | 0 |
| NM_001271 | CHD2      | 0 | XM_496819 | TBX18    | 0 |
| NM_001061 | TBXAS1    | 0 | NM_000669 | ADH1C    | 0 |
| NM_007112 | THBS3     | 0 | NM_006288 | THY1     | 0 |
| NM_012478 | WBP2      | 0 | NM_032780 | TMEM25   | 0 |
| NM_002053 | GBP1      | 0 | NM_024827 | HDAC11   | 0 |
| NM_004152 | OAZ1      | 0 | NM_002853 | RAD1     | 0 |
| NM_005732 | RAD50     | 0 | NM_014214 | IMPA2    | 0 |
| NM_006267 | RANBP2    | 0 | NM_002606 | PDE9A    | 0 |
| NM_005063 | SCD       | 0 | NM_006515 | SETMAR   | 0 |



|           |           |   |           |           |   |
|-----------|-----------|---|-----------|-----------|---|
| NM_005021 | ENPP3     | 0 | NM_015915 | SPG3A     | 0 |
| NM_012444 | SPO11     | 0 | NM_000400 | ERCC2     | 0 |
| NM_005646 | TARBP1    | 0 | NM_020998 | MST1      | 0 |
| XM_033391 | PPP1R3E   | 0 | NM_001069 | TUBB      | 0 |
| NM_004840 | ARHGEF6   | 0 | NM_014889 | PITRM1    | 0 |
| NM_007038 | ADAMTS5   | 0 | NM_016339 | RAPGEFL1  | 0 |
| XM_087254 | ATP11B    | 0 | NM_005746 | PBEF1     | 0 |
| NM_005006 | NDUFS1    | 0 | NM_006534 | NCOA3     | 0 |
| NM_001166 | BIRC2     | 0 | NM_005762 | TRIM28    | 0 |
| NM_004562 | PARK2     | 0 | NM_005879 | TRIP      | 0 |
| NM_007014 | WWP2      | 0 | NM_012168 | FBXO2     | 0 |
| NM_012170 | FBXO22    | 0 | NM_020892 | DTX2      | 0 |
| NM_001732 | BTN1A1    | 0 | NM_016372 | TPRA40    | 0 |
| NM_016364 | DUSP13    | 0 | NM_000510 | FSHB      | 0 |
| NM_003854 | IL1RL2    | 0 | NM_005260 | GDF9      | 0 |
| NM_032871 | TNFRSF19L | 0 | NM_001819 | CHGB      | 0 |
| NM_014376 | CYFIP2    | 0 | NM_001657 | AREG      | 0 |
| NM_002391 | MDK       | 0 | NM_007117 | TRH       | 0 |
| NM_003377 | VEGFB     | 0 | NM_021783 | XEDAR     | 0 |
| NM_001405 | EFNA2     | 0 | NM_013251 | TAC3      | 0 |
| NM_006119 | FGF8      | 0 | NM_000461 | THRB      | 0 |
| NM_002246 | KCNK3     | 0 | NM_004700 | KCNQ4     | 0 |
| XM_029962 | KCNT1     | 0 | NM_005984 | SLC25A1   | 0 |
| NM_152388 | ALS2CR4   | 0 | NM_005135 | SLC12A6   | 0 |
| NM_015865 | SLC14A1   | 0 | NM_001086 | AADAC     | 0 |
| NM_003500 | ACOX2     | 0 | NM_005168 | ARHE      | 0 |
| NM_000927 | ABCB1     | 0 | NM_000671 | ADH5      | 0 |
| NM_001791 | CDC42     | 0 | NM_007061 | CDC42EP1  | 0 |
| NM_000781 | CYP11A1   | 0 | NM_032490 | C14ORF142 | 0 |
| NM_014501 | UBE2S     | 0 | NM_004091 | E2F2      | 0 |
| NM_001950 | E2F4      | 0 | NM_024585 | FLJ22160  | 0 |
| NM_152579 | FLJ38564  | 0 | NM_004960 | FUS       | 0 |
| NM_032827 | ATOH8     | 0 | NM_007035 | KERA      | 0 |
| NM_004461 | FARSLA    | 0 | NM_000422 | KRT17     | 0 |
| NM_006165 | NFRKB     | 0 | NM_004813 | PEX16     | 0 |
| NM_145252 | LOC124220 | 0 | BC052374  | LOC253039 | 0 |
| NM_138770 | LOC90557  | 0 | NM_006222 | PIN1L     | 0 |
| NM_006224 | PITPN     | 0 | NM_012267 | HSPBP1    | 0 |
| NM_015541 | LRIG1     | 0 | NM_014308 | P101-PI3K | 0 |
| NM_004575 | POU4F2    | 0 | NM_022136 | SAMSN1    | 0 |
| NM_018262 | WDR10     | 0 | NM_005175 | ATP5G1    | 0 |
| NM_001283 | AP1S1     | 0 | NM_001585 | C22ORF1   | 0 |
| NM_005182 | CA7       | 0 | XM_114735 | CR1L      | 0 |
| NM_001677 | ATP1B1    | 0 | NM_001327 | CTAG1B    | 0 |
| XM_088636 | CYLC1     | 0 | NM_001971 | ELA1      | 0 |
| NM_004434 | EML1      | 0 | NM_000774 | CYP2F1    | 0 |

|           |           |   |           |           |   |
|-----------|-----------|---|-----------|-----------|---|
| NM_001555 | IGSF1     | 0 | NM_181501 | ITGA1     | 0 |
| NM_001472 | GAGE2     | 0 | NM_021065 | HIST1H2AD | 0 |
| NM_021062 | HIST1H2BB | 0 | NM_002259 | KLRC1     | 0 |
| NM_001383 | DPH2L1    | 0 | NM_001386 | DPYSL2    | 0 |
| NM_005895 | GOLGA3    | 0 | NM_002081 | GPC1      | 0 |
| NM_013402 | FADS1     | 0 | NM_004998 | MYO1E     | 0 |
| NM_006250 | PRH1      | 0 | NM_005907 | MAN1A1    | 0 |
| NM_002380 | MATN2     | 0 | NM_080283 | ABCA9     | 0 |
| NM_005917 | MDH1      | 0 | NM_012089 | ABCB10    | 0 |
| NM_002453 | MTIF2     | 0 | NM_173712 | MTND4L    | 0 |
| NM_006278 | SIAT4C    | 0 | NM_002896 | RBM4      | 0 |
| NM_021136 | RTN1      | 0 | NM_003081 | SNAP25    | 0 |
| NM_006751 | SSFA2     | 0 | NM_006299 | ZNF193    | 0 |
| NM_003165 | STXBP1    | 0 | NM_014242 | ZNF237    | 0 |
| NM_003678 | C22ORF19  | 0 | NM_003683 | D21S2056E | 0 |
| NM_004781 | VAMP3     | 0 | NM_004907 | IER2      | 0 |
| NM_004200 | SYT7      | 0 | NM_004674 | ASH2L     | 0 |
| NM_004252 | SLC9A3R1  | 0 | NM_004796 | NRXN3     | 0 |
| NM_004258 | IGSF2     | 0 | NM_005455 | ZNF265    | 0 |
| NM_004696 | SLC16A4   | 0 | NM_004267 | CHST2     | 0 |
| NM_004867 | ITM2A     | 0 | NM_004273 | CHST3     | 0 |
| NM_003860 | BANF1     | 0 | NM_014783 | ARHGAP11A | 0 |
| NM_005839 | SRRM1     | 0 | NM_014688 | USP6NL    | 0 |
| NM_021647 | KIAA0626  | 0 | NM_005492 | CST8      | 0 |
| NM_005495 | SLC17A4   | 0 | NM_014704 | KIAA0562  | 0 |
| NM_016134 | PGCP      | 0 | NM_014854 | SLC35E2   | 0 |
| NM_006108 | SPON1     | 0 | NM_006324 | CFDP1     | 0 |
| NM_006338 | LRRN5     | 0 | NM_006605 | RFPL2     | 0 |
| NM_006401 | ANP32B    | 0 | NM_006643 | SDCCAG3   | 0 |
| NM_006414 | RPP38     | 0 | NM_007211 | C12ORF2   | 0 |
| NM_006464 | TGOLN2    | 0 | NM_006555 | YKT6      | 0 |
| NM_014974 | KIAA0934  | 0 | XM_290758 | KIAA0553  | 0 |
| NM_007350 | PHLDA1    | 0 | NM_014892 | RBM16     | 0 |
| NM_015259 | ICOSL     | 0 | NM_015050 | KIAA0082  | 0 |
| XM_045423 | KIAA0701  | 0 | NM_015288 | PHF15     | 0 |
| XM_290598 | DDN       | 0 | NM_012242 | DKK1      | 0 |
| NM_012341 | GTPBP4    | 0 | NM_015371 | HS322B1A  | 0 |
| NM_015373 | C22ORF2   | 0 | NM_015471 | DC8       | 0 |
| NM_015474 | SAMHD1    | 0 | NM_015332 | KIAA1068  | 0 |
| NM_015340 | LARS2     | 0 | NM_015901 | NUDT13    | 0 |
| NM_012239 | SIRT3     | 0 | NM_012264 | C22ORF5   | 0 |
| NM_014034 | ASF1A     | 0 | NM_014331 | SLC7A11   | 0 |
| NM_015404 | DFNB31    | 0 | NM_015542 | UPF2      | 0 |
| NM_015557 | CHD5      | 0 | NM_014020 | LR8       | 0 |
| NM_018959 | DAZAP1    | 0 | NM_014437 | SLC39A1   | 0 |
| NM_015697 | CL640     | 0 | NM_015701 | C2ORF30   | 0 |

|           |               |   |           |               |   |
|-----------|---------------|---|-----------|---------------|---|
| NM_014167 | HSPC128       | 0 | NM_014168 | HSPC133       | 0 |
| NM_014398 | LAMP3         | 0 | NM_014410 | CLUL1         | 0 |
| NM_013270 | TSP50         | 0 | NM_015686 | TMEM28        | 0 |
| NM_016459 | PACAP         | 0 | NM_015997 | CGI-41        | 0 |
| NM_016565 | E2IG2         | 0 | NM_016119 | PHF11         | 0 |
| NM_014581 | OBP2B         | 0 | NM_019060 | NICE-1        | 0 |
| NM_016524 | LOC51760      | 0 | NM_017734 | PALMD         | 0 |
| NM_017745 | BCOR          | 0 | NM_018058 | CRTAC1        | 0 |
| NM_017644 | DRE1          | 0 | NM_017801 | CKLFSF6       | 0 |
| NM_017805 | RASIP1        | 0 | NM_017933 | FLJ20701      | 0 |
| NM_175748 | C14ORF130     | 0 | NM_017826 | FLJ20449      | 0 |
| NM_018181 | ZNF532        | 0 | NM_018365 | MNS1          | 0 |
| NM_018195 | FLJ10726      | 0 | NM_018378 | FBXL8         | 0 |
| NM_018205 | LRRC20        | 0 | NM_018214 | LRRC1         | 0 |
| NM_018227 | FLJ10808      | 0 | NM_017722 | FLJ20244      | 0 |
| NM_018235 | CNDP2         | 0 | NM_017736 | THUMPD1       | 0 |
| NM_018487 | HCA112        | 0 | NM_018338 | FLJ11142      | 0 |
| NM_018648 | NOLA3         | 0 | NM_018656 | SLC35E3       | 0 |
| NM_018700 | TRIM36        | 0 | NM_018295 | FLJ11000      | 0 |
| NM_017925 | C9ORF55       | 0 | NM_032560 | KIAA2010      | 0 |
| NM_017980 | LIMS2         | 0 | NM_017991 | FLJ10081      | 0 |
| NM_018280 | FLJ10945      | 0 | NM_020660 | CX36          | 0 |
| NM_020152 | C21ORF7       | 0 | NM_019885 | CYP26B1       | 0 |
| XM_371956 | KIAA1549      | 0 | NM_020826 | SYT13         | 0 |
| NM_020830 | WDFY1         | 0 | NM_021245 | MYOZ1         | 0 |
| NM_020954 | KIAA1618      | 0 | XM_046305 | KIAA1205      | 0 |
| NM_020746 | KIAA1271      | 0 | NM_020752 | GPR158        | 0 |
| NM_021184 | C6ORF47       | 0 | NM_021046 | UHSKERB       | 0 |
| XM_033173 | PCDH19        | 0 | NM_021927 | FLJ13220      | 0 |
| NM_021931 | DHX35         | 0 | NM_031902 | MRPS5         | 0 |
| NM_022370 | ROBO3         | 0 | NM_022464 | SIL1          | 0 |
| NM_022821 | ELOVL1        | 0 | NM_024053 | C22ORF18      | 0 |
| NM_024339 | MGC2655       | 0 | NM_024755 | FLJ13213      | 0 |
| NM_024554 | PGBD5         | 0 | NM_024558 | C14ORF138     | 0 |
| NM_024574 | FLJ23191      | 0 | NM_024575 | FLJ23467      | 0 |
| NM_024788 | FLJ21062      | 0 | NM_024581 | C6ORF60       | 0 |
| NM_024587 | FLJ22353      | 0 | NM_024299 | C20ORF149     | 0 |
| NM_024939 | FLJ21918      | 0 | NM_024946 | NIP30         | 0 |
| XM_371114 | FHOD3         | 0 | NM_024969 | TAIP-2        | 0 |
| NM_024993 | LRRTM4        | 0 | NM_025158 | RUFY1         | 0 |
| NM_025165 | ELL3          | 0 | NM_025188 | TRIM45        | 0 |
| NM_173050 | SCUBE1        | 0 | NM_025228 | T3JAM         | 0 |
| NM_025115 | FLJ23263      | 0 | NM_030797 | DKFZP566A1524 | 0 |
| NM_031294 | DKFZP586M1120 | 0 | NM_181519 | SYT15         | 0 |
| NM_031913 | CHR3SYT       | 0 | NM_032177 | PHAX          | 0 |
| NM_031444 | C22ORF13      | 0 | NM_030937 | CCNL2         | 0 |

|           |              |   |           |           |   |
|-----------|--------------|---|-----------|-----------|---|
| NM_031956 | NYD-SP14     | 0 | NM_032027 | BBP       | 0 |
| NM_030981 | RAB1B        | 0 | NM_032581 | DRCTNNB1A | 0 |
| NM_032482 | DOT1L        | 0 | NM_032439 | PHYHIPL   | 0 |
| NM_032320 | GMRP-1       | 0 | NM_032609 | COX4I2    | 0 |
| NM_032644 | MGC2452      | 0 | NM_032826 | SLC35B4   | 0 |
| NM_032853 | MUM1         | 0 | NM_032747 | USMG5     | 0 |
| NM_032889 | MGC11308     | 0 | NM_138568 | XTP7      | 0 |
| XM_031561 | FLJ14502     | 0 | NM_032936 | C7ORF35   | 0 |
| NM_033449 | FCHSD1       | 0 | NM_133373 | PLCD3     | 0 |
| NM_079834 | SCAMP4       | 0 | NM_138422 | LOC113179 | 0 |
| NM_058190 | C21ORF70     | 0 | NM_198920 | C6ORF157  | 0 |
| XM_371152 | ZNF486       | 0 | NM_138360 | LOC90668  | 0 |
| NM_052879 | LOC113251    | 0 | NM_033277 | LACRT     | 0 |
| NM_033397 | KIAA1754     | 0 | NM_178121 | SBP1      | 0 |
| XM_372193 | KIAA1751     | 0 | NM_033061 | KRTAP4-7  | 0 |
| NM_052934 | SLC26A9      | 0 | NM_152287 | ZFP276    | 0 |
| NM_144579 | SFXN5        | 0 | NM_144597 | MGC29937  | 0 |
| NM_173480 | LOC126295    | 0 | NM_181643 | LOC128344 | 0 |
| NM_153690 | FLJ90022     | 0 | NM_152399 | FLJ30834  | 0 |
| NM_152413 | MGC33309     | 0 | NM_145263 | LOC132671 | 0 |
| NM_152437 | DKFZP761B128 | 0 | NM_152384 | BBS5      | 0 |
| NM_153706 | MGC33648     | 0 | NM_175874 | MGC47869  | 0 |
| NM_182508 | FLJ40919     | 0 | NM_152462 | TMEM21A   | 0 |
| XM_096733 | C14ORF72     | 0 | NM_152444 | ZADH1     | 0 |
| NM_173078 | SLITRK4      | 0 | NM_178491 | R3HDML    | 0 |
| XM_085831 | LOC147645    | 0 | NM_145053 | MGC20470  | 0 |
| NM_002475 | MLC1SA       | 0 | NM_152459 | MGC45438  | 0 |
| NM_144692 | LOC148137    | 0 | NM_152908 | FLJ31196  | 0 |
| XM_351649 | OACT1        | 0 | NM_152510 | MGC26710  | 0 |
| NM_152492 | FLJ32825     | 0 | NM_152570 | FLJ31810  | 0 |
| NM_175882 | IMP5         | 0 | NM_138280 | CLYBL     | 0 |
| NM_152601 | FLJ38281     | 0 | NM_152636 | FLJ33979  | 0 |
| NM_173531 | ZNF100       | 0 | NM_181701 | QSCN6L1   | 0 |
| NM_152632 | CXORF22      | 0 | NM_207338 | KLPH      | 0 |
| XM_378240 | LOC170425    | 0 | NM_130759 | IMAP1     | 0 |
| NM_152660 | MGC34648     | 0 | NM_152681 | FLJ38482  | 0 |
| NM_152734 | C6ORF89      | 0 | NM_145303 | LOC202459 | 0 |
| XM_371401 | C20ORF106    | 0 | NM_174923 | MGC31967  | 0 |
| XM_371878 | FLJ14712     | 0 | XM_166508 | TWISTNB   | 0 |
| XM_291062 | KIAA2018     | 0 | XM_378230 | C10ORF40  | 0 |
| NM_145065 | MGC35521     | 0 | NM_173607 | C14ORF24  | 0 |
| NM_173659 | MGC29784     | 0 | XM_209140 | LOC284323 | 0 |
| NM_198477 | UNQ473       | 0 | NM_174945 | ZNF575    | 0 |
| XM_379258 | LOC285547    | 0 | XM_379064 | LOC284933 | 0 |
| NM_206880 | OR2V2        | 0 | NM_173676 | PNPLA1    | 0 |
| XM_379324 | LOC340113    | 0 | NM_198495 | CTAGE4    | 0 |

|              |               |   |              |           |   |
|--------------|---------------|---|--------------|-----------|---|
| NM_198317    | LOC339451     | 0 | XM_378941    | LOC339535 | 0 |
| XM_379665    | LOC286333     | 0 | XM_379728    | LOC286411 | 0 |
| XM_293090    | SH3MD4        | 0 | XM_371248    | LOC374973 | 0 |
| XM_294357    | LOC346653     | 0 | NM_207379    | FLJ42486  | 0 |
| NM_207382    | FLJ43276      | 0 | NM_198567    | FLJ44216  | 0 |
| NM_182614    | MGC20579      | 0 | NM_199337    | LOC374395 | 0 |
| NM_198529    | FLJ46247      | 0 | XM_379520    | FLJ43663  | 0 |
| NM_182905    | DKFZP434K1323 | 0 | NM_199358    | FOX4L3    | 0 |
| NM_198944    | OR7C1         | 0 | NM_018964    | SLC37A1   | 0 |
| XM_062890    | LOC121981     | 0 | XM_496404    | LOC440683 | 0 |
| NM_203453    | LOC403313     | 0 | XM_292225    | LOC338879 | 0 |
| XM_086937    | LOC150519     | 0 | XM_209604    | LOC285423 | 0 |
| XM_292384    | LOC342132     | 0 | XM_060956    | LOC128371 | 0 |
| XM_211447    | LOC284409     | 0 | XM_117266    | LOC200726 | 0 |
| XM_065722    | LOC130429     | 0 | XM_297205    | LOC342900 | 0 |
| XM_297816    | LOC343637     | 0 | XM_114415    | LOC201989 | 0 |
| XM_211408    | LOC284260     | 0 | XM_292813    | LOC342972 | 0 |
| XM_210856    | LOC283029     | 0 | XM_294723    | LOC338825 | 0 |
| XM_373896    | LOC388755     | 0 | XM_378901    | LOC400786 | 0 |
| XM_371511    | LOC388972     | 0 | XM_371306    | LOC388689 | 0 |
| XM_376099    | LOC400985     | 0 | XM_373878    | LOC388719 | 0 |
| XM_371684    | LOC389192     | 0 | XM_373893    | LOC388751 | 0 |
| XM_377577    | LOC401944     | 0 | XM_371665    | LOC389151 | 0 |
| XM_373076    | LOC391764     | 0 | XM_373090    | LOC391797 | 0 |
| XM_371726    | LOC389267     | 0 | XM_379506    | LOC401384 | 0 |
| XM_291247    | LOC389530     | 0 | XM_379512    | LOC401394 | 0 |
| XM_374249    | LOC389628     | 0 | XM_379603    | LOC401476 | 0 |
| XM_379786    | LOC402461     | 0 | XM_374272    | LOC389666 | 0 |
| XM_373253    | LOC392222     | 0 | XM_374705    | LOC393078 | 0 |
| XM_379847    | LOC402520     | 0 | XM_373471    | LOC387706 | 0 |
| XM_376846    | LOC401511     | 0 | XM_374283    | LOC389689 | 0 |
| XM_378398    | LOC400092     | 0 | XM_378416    | LOC400134 | 0 |
| XM_373566    | LOC387931     | 0 | XM_372490    | LOC390387 | 0 |
| XM_373660    | LOC388206     | 0 | XM_372723    | LOC390916 | 0 |
| XM_371197    | LOC388565     | 0 | XM_371200    | LOC388567 | 0 |
| XM_378700    | LOC400618     | 0 | XM_372702    | LOC390874 | 0 |
| XM_371142    | LOC388509     | 0 | XM_373921    | LOC388806 | 0 |
| XM_371024    | LOC388345     | 0 | XM_372869    | LOC391253 | 0 |
| XM_377002    | LOC401590     | 0 | XM_371395    | LOC388794 | 0 |
| NM_001001681 | FLJ45300      | 0 | XM_372262    | LOC389901 | 0 |
| XM_373340    | LOC392433     | 0 | NM_001001712 | LCN10     | 0 |
| NM_001001920 | OR4C15        | 0 | NM_001002035 | DEFB108   | 0 |
| XM_373366    | LOC392528     | 0 | XM_379046    | LOC400923 | 0 |
| XM_373957    | LOC388897     | 0 | NM_001005276 | OR2AE1    | 0 |
| XM_372891    | LOC391303     | 0 | XM_351948    | LOC389916 | 0 |
| NM_001003819 | TRIM6-TRIM34  | 0 | XM_379885    | LOC402562 | 0 |

|              |          |      |              |               |      |
|--------------|----------|------|--------------|---------------|------|
| NM_213609    | FAM19A1  | 0    | XM_380134    | LOC402574     | 0    |
| NM_001006121 | RBMY1B   | 0    | NM_001006603 | MG29          | 0    |
| NM_005198    | CHKB     | 0.01 | NM_004302    | ACVR1B        | 0.01 |
| NM_032237    | FLJ23356 | 0.01 | XM_291277    | DKFZP761P0423 | 0.01 |
| NM_001626    | AKT2     | 0.01 | NM_001946    | DUSP6         | 0.01 |
| NM_001262    | CDKN2C   | 0.01 | NM_173575    | STK32C        | 0.01 |
| NM_032471    | PKIB     | 0.01 | NM_002746    | MAPK3         | 0.01 |
| NM_006252    | PRKAA2   | 0.01 | XM_046685    | KIAA1399      | 0.01 |
| NM_015254    | KIF13B   | 0.01 | NM_003831    | RIOK3         | 0.01 |
| NM_005406    | ROCK1    | 0.01 | NM_003161    | RPS6KB1       | 0.01 |
| NM_006622    | PLK2     | 0.01 | NM_001742    | CALCR         | 0.01 |
| NM_005624    | CCL25    | 0.01 | NM_015000    | STK38L        | 0.01 |
| NM_002923    | RGS2     | 0.01 | NM_031936    | GPR61         | 0.01 |
| NM_004432    | ELAVL2   | 0.01 | NM_002898    | RBMS2         | 0.01 |
| NM_004240    | TRIP10   | 0.01 | NM_152235    | SFRS8         | 0.01 |
| NM_003428    | ZNF84    | 0.01 | NM_003189    | TAL1          | 0.01 |
| NM_004098    | EMX2     | 0.01 | NM_004514    | FOXK2         | 0.01 |
| NM_006312    | NCOR2    | 0.01 | NM_012259    | HEY2          | 0.01 |
| NM_014571    | HEYL     | 0.01 | NM_005870    | SAP18         | 0.01 |
| NM_006735    | HOXA2    | 0.01 | NM_001226    | CASP6         | 0.01 |
| NM_006974    | ZNF33A   | 0.01 | NM_000687    | AHCY          | 0.01 |
| NM_003754    | EIF3S5   | 0.01 | NM_004044    | ATIC          | 0.01 |
| NM_016245    | DHRS8    | 0.01 | NM_004208    | PDCD8         | 0.01 |
| NM_152667    | HDHD4    | 0.01 | NM_020202    | NIT2          | 0.01 |
| NM_005659    | UFD1L    | 0.01 | NM_021794    | ADAM30        | 0.01 |
| NM_003340    | UBE2D3   | 0.01 | NM_022553    | VPS52         | 0.01 |
| NM_004163    | RAB27B   | 0.01 | NM_002542    | OGG1          | 0.01 |
| NM_002878    | RAD51L3  | 0.01 | NM_000300    | PLA2G2A       | 0.01 |
| NM_006420    | ARFGEF2  | 0.01 | NM_004583    | RAB5C         | 0.01 |
| NM_012189    | CABYR    | 0.01 | NM_000801    | FKBP1A        | 0.01 |
| NM_000265    | NCF1     | 0.01 | NM_004656    | BAP1          | 0.01 |
| NM_020165    | RAD18    | 0.01 | NM_003922    | HERC1         | 0.01 |
| NM_017641    | KIF21A   | 0.01 | NM_014225    | PPP2R1A       | 0.01 |
| NM_002829    | PTPN3    | 0.01 | NM_021090    | MTMR3         | 0.01 |
| NM_002186    | IL9R     | 0.01 | NM_005538    | INHBC         | 0.01 |
| NM_003581    | NCK2     | 0.01 | NM_002131    | HMGA1         | 0.01 |
| NM_003006    | SELPLG   | 0.01 | NM_005117    | FGF19         | 0.01 |
| NM_005126    | NR1D2    | 0.01 | NM_001723    | BPAG1         | 0.01 |
| NM_016824    | ADD3     | 0.01 | NM_006511    | RSC1A1        | 0.01 |
| NM_003049    | SLC10A1  | 0.01 | NM_015120    | ALMS1         | 0.01 |
| NM_020399    | GOPC     | 0.01 | NM_005477    | HCN4          | 0.01 |
| NM_004913    | C16ORF7  | 0.01 | NM_002251    | KCNS1         | 0.01 |
| NM_001662    | ARF5     | 0.01 | NM_005891    | ACAT2         | 0.01 |
| NM_002202    | ISL1     | 0.01 | XM_496142    | ITGAD         | 0.01 |
| NM_001976    | ENO3     | 0.01 | NM_002301    | LDHC          | 0.01 |
| NM_014459    | PCDH17   | 0.01 | NM_001151    | SLC25A4       | 0.01 |

|           |              |      |           |               |      |
|-----------|--------------|------|-----------|---------------|------|
| NM_005609 | PYGM         | 0.01 | NM_005833 | RAB9P40       | 0.01 |
| NM_001690 | ATP6V1A      | 0.01 | NM_001694 | ATP6V0C       | 0.01 |
| NM_015270 | ADCY6        | 0.01 | NM_001122 | ADFP          | 0.01 |
| NM_005140 | CNGA2        | 0.01 | NM_001860 | SLC31A2       | 0.01 |
| NM_000727 | CACNG1       | 0.01 | NM_001884 | HAPLN1        | 0.01 |
| NM_170662 | CBLB         | 0.01 | NM_001679 | ATP1B3        | 0.01 |
| NM_001247 | ENTPD6       | 0.01 | NM_004391 | CYP8B1        | 0.01 |
| NM_000820 | GAS6         | 0.01 | NM_019112 | ABCA7         | 0.01 |
| NM_004146 | NDUFB7       | 0.01 | NM_016228 | AADAT         | 0.01 |
| NM_005071 | SLC1A6       | 0.01 | NM_002762 | PRM2          | 0.01 |
| NM_013360 | ZNF222       | 0.01 | NM_004179 | TPH1          | 0.01 |
| NM_004622 | TSN          | 0.01 | NM_003535 | HIST1H3J      | 0.01 |
| NM_003586 | DOC2A        | 0.01 | NM_003910 | G10           | 0.01 |
| NM_003762 | VAMP4        | 0.01 | NM_004848 | C10RF38       | 0.01 |
| XM_379800 | KIAA0644     | 0.01 | NM_014748 | SNX17         | 0.01 |
| NM_006327 | TIMM23       | 0.01 | NM_014865 | CNAP1         | 0.01 |
| XM_376060 | ARHGAP25     | 0.01 | NM_005815 | ZNF443        | 0.01 |
| NM_015029 | POP1         | 0.01 | NM_014142 | NUDT5         | 0.01 |
| XM_045792 | GCN1L1       | 0.01 | NM_006459 | C10ORF69      | 0.01 |
| NM_007010 | DDX52        | 0.01 | NM_006786 | UTS2          | 0.01 |
| NM_012306 | FAIM2        | 0.01 | NM_014909 | KIAA1036      | 0.01 |
| NM_015022 | PDZK3        | 0.01 | XM_093839 | KIAA0826      | 0.01 |
| NM_015151 | C21ORF106    | 0.01 | NM_015303 | KIAA0804      | 0.01 |
| NM_014310 | RASD2        | 0.01 | NM_015327 | EST1B         | 0.01 |
| NM_012279 | ZNF346       | 0.01 | NM_015497 | DKFZP564G2022 | 0.01 |
| NM_012244 | SLC7A8       | 0.01 | NM_015421 | DKFZP564K2062 | 0.01 |
| NM_012295 | CABIN1       | 0.01 | XM_291986 | OR10A3        | 0.01 |
| NM_013245 | VPS4A        | 0.01 | NM_014466 | TEKT2         | 0.01 |
| NM_015658 | DKFZP564C186 | 0.01 | NM_014169 | C14ORF123     | 0.01 |
| NM_014484 | MOCS3        | 0.01 | NM_013238 | DNAJD1        | 0.01 |
| NM_014425 | INVS         | 0.01 | NM_030622 | CYP2S1        | 0.01 |
| NM_015965 | GRIM19       | 0.01 | NM_016950 | SPOCK3        | 0.01 |
| NM_015987 | HEBP1        | 0.01 | NM_016115 | ASB3          | 0.01 |
| NM_016063 | C6ORF74      | 0.01 | NM_016527 | HAO2          | 0.01 |
| NM_018986 | SH3TC1       | 0.01 | NM_017821 | RHBDL2        | 0.01 |
| NM_017822 | FLJ20436     | 0.01 | NM_017952 | FLJ20758      | 0.01 |
| NM_016506 | KBTBD4       | 0.01 | NM_018392 | FLJ11331      | 0.01 |
| NM_018246 | FLJ10853     | 0.01 | NM_020200 | PRTFDC1       | 0.01 |
| NM_020645 | NRIP3        | 0.01 | XM_050325 | KIAA1126      | 0.01 |
| NM_020795 | NLGN2        | 0.01 | NM_020866 | KLHL1         | 0.01 |
| XM_372133 | KIAA1529     | 0.01 | NM_021210 | TRAPPC1       | 0.01 |
| NM_022367 | SEMA4A       | 0.01 | NM_023007 | FLJ12517      | 0.01 |
| NM_022756 | FLJ11730     | 0.01 | NM_022460 | FLJ14249      | 0.01 |
| NM_022118 | C13ORF10     | 0.01 | NM_022838 | FLJ12969      | 0.01 |
| NM_024006 | VKORC1       | 0.01 | NM_024295 | MGC3067       | 0.01 |
| NM_024677 | FLJ14001     | 0.01 | NM_024792 | CT120         | 0.01 |

|              |               |      |           |              |      |
|--------------|---------------|------|-----------|--------------|------|
| NM_024796    | FLJ22639      | 0.01 | NM_025126 | RNF34        | 0.01 |
| NM_024947    | PHC3          | 0.01 | XM_376325 | FLJ13105     | 0.01 |
| NM_030820    | COL21A1       | 0.01 | NM_030925 | CAB39L       | 0.01 |
| NM_031430    | RILP          | 0.01 | XM_371164 | NYD-SP11     | 0.01 |
| NM_031454    | SELO          | 0.01 | NM_030965 | SIAT7E       | 0.01 |
| NM_032034    | SLC4A11       | 0.01 | NM_030978 | ARPC5L       | 0.01 |
| NM_032286    | MGC5309       | 0.01 | NM_032296 | DKFZP761A132 | 0.01 |
| NM_032324    | MGC13186      | 0.01 | NM_032824 | FLJ14681     | 0.01 |
| NM_032344    | MGC13045      | 0.01 | NM_032679 | ZNF577       | 0.01 |
| NM_031460    | KCNK17        | 0.01 | XM_371461 | KIAA1671     | 0.01 |
| XM_029323    | LOC90133      | 0.01 | XM_027668 | SLC25A25     | 0.01 |
| NM_052911    | EFO1          | 0.01 | NM_031910 | C1QTNF6      | 0.01 |
| NM_053284    | WFIKKN        | 0.01 | XM_062871 | FLJ40176     | 0.01 |
| NM_144595    | FLJ30046      | 0.01 | NM_178860 | SEZ6         | 0.01 |
| NM_145171    | GPB5          | 0.01 | NM_032796 | SYAP1        | 0.01 |
| NM_198446    | FLJ45459      | 0.01 | XM_059051 | LOC126520    | 0.01 |
| NM_080740    | SUHW1         | 0.01 | NM_174898 | LOC129530    | 0.01 |
| NM_138799    | LOC129642     | 0.01 | NM_198449 | MGC71745     | 0.01 |
| NM_203299    | MGC41945      | 0.01 | NM_130848 | DCNP1        | 0.01 |
| NM_145056    | MGC15476      | 0.01 | NM_182520 | FLJ36561     | 0.01 |
| NM_144695    | FLJ32421      | 0.01 | XM_166346 | C6ORF129     | 0.01 |
| XM_379114    | LOC150577     | 0.01 | NM_152995 | HOZFP        | 0.01 |
| NM_152525    | FLJ25351      | 0.01 | NM_145652 | WFDC5        | 0.01 |
| NM_145057    | CDC42EP5      | 0.01 | NM_152617 | FLJ35794     | 0.01 |
| XM_113706    | DNAH10        | 0.01 | NM_201400 | SB153        | 0.01 |
| NM_175060    | C14ORF27      | 0.01 | NM_152677 | ZNF494       | 0.01 |
| NM_152727    | CPNE2         | 0.01 | NM_181336 | LEMD2        | 0.01 |
| NM_145020    | FLJ32743      | 0.01 | NM_152751 | C10ORF30     | 0.01 |
| NM_152913    | DKFZP761L1417 | 0.01 | NM_198473 | FLJ46111     | 0.01 |
| NM_173803    | FLJ39599      | 0.01 | NM_152770 | MGC35043     | 0.01 |
| NM_182701    | GPX6          | 0.01 | NM_153270 | FLJ34960     | 0.01 |
| NM_181717    | HCG27         | 0.01 | XM_371335 | LOC388726    | 0.01 |
| NM_148896    | NPB           | 0.01 | NM_198485 | FLJ41238     | 0.01 |
| XM_375935    | LOC284825     | 0.01 | NM_152616 | TRIM42       | 0.01 |
| XM_379530    | LOC285972     | 0.01 | NM_207403 | FLJ42986     | 0.01 |
| NM_178314    | FLJ39378      | 0.01 | NM_198283 | EGFL11       | 0.01 |
| NM_198549    | FLJ35093      | 0.01 | NM_207377 | UNQ9438      | 0.01 |
| NM_182617    | LOC348158     | 0.01 | NM_175078 | KRT1B        | 0.01 |
| XM_372143    | C9ORF119      | 0.01 | XM_373798 | LOC374890    | 0.01 |
| NM_207479    | FLJ41046      | 0.01 | NM_205856 | LOC389852    | 0.01 |
| NM_207487    | FLJ46211      | 0.01 | NM_207491 | MGC48628     | 0.01 |
| NM_001001551 | C9ORF103      | 0.01 | NM_203449 | FLJ20444     | 0.01 |
| NM_203448    | MGC21881      | 0.01 | NM_203307 | MGC35402     | 0.01 |
| NM_207647    | MGC45564      | 0.01 | XM_291543 | LOC343381    | 0.01 |
| XM_096864    | LOC145780     | 0.01 | XM_295058 | LOC339760    | 0.01 |
| XM_293680    | LOC345051     | 0.01 | XM_093644 | LOC152138    | 0.01 |



|              |           |      |           |           |      |
|--------------|-----------|------|-----------|-----------|------|
| XM_059473    | LOC130839 | 0.01 | XM_293026 | LOC344382 | 0.01 |
| XM_084868    | LOC144448 | 0.01 | XM_208356 | LOC285849 | 0.01 |
| XM_087800    | LOC153918 | 0.01 | XM_291334 | LOC340543 | 0.01 |
| XM_210186    | LOC283162 | 0.01 | XM_098512 | LOC154323 | 0.01 |
| XM_378843    | LOC400743 | 0.01 | XM_371497 | LOC388957 | 0.01 |
| XM_376200    | LOC401047 | 0.01 | XM_371534 | LOC389000 | 0.01 |
| XM_376241    | LOC401070 | 0.01 | XM_372984 | LOC391509 | 0.01 |
| XM_377824    | LOC402157 | 0.01 | XM_372916 | LOC391352 | 0.01 |
| XM_374047    | LOC389143 | 0.01 | XM_373037 | LOC391711 | 0.01 |
| XM_376591    | LOC401322 | 0.01 | XM_373028 | LOC391661 | 0.01 |
| XM_376353    | LOC401160 | 0.01 | XM_377879 | LOC402202 | 0.01 |
| XM_379909    | LOC402580 | 0.01 | XM_372112 | LOC389753 | 0.01 |
| XM_372169    | LOC389822 | 0.01 | XM_374801 | LOC399761 | 0.01 |
| XM_374307    | LOC389801 | 0.01 | XM_370759 | LOC387979 | 0.01 |
| XM_373445    | LOC387631 | 0.01 | XM_373599 | LOC388001 | 0.01 |
| XM_378272    | LOC399866 | 0.01 | XM_372504 | LOC390436 | 0.01 |
| XM_373637    | LOC388141 | 0.01 | XM_378684 | LOC400604 | 0.01 |
| XM_370843    | LOC388092 | 0.01 | XM_375344 | LOC400526 | 0.01 |
| XM_375387    | LOC400566 | 0.01 | XM_375632 | LOC400708 | 0.01 |
| XM_375292    | LOC400492 | 0.01 | XM_372727 | LOC390928 | 0.01 |
| XM_372609    | LOC390669 | 0.01 | XM_373770 | LOC388454 | 0.01 |
| XM_378649    | LOC400573 | 0.01 | XM_371405 | LOC388809 | 0.01 |
| XM_372864    | LOC391241 | 0.01 | XM_372233 | LOC389873 | 0.01 |
| NM_001004339 | LOC440590 | 0.01 | XM_372889 | LOC391298 | 0.01 |
| XM_373398    | LOC392586 | 0.01 | NM_001799 | CDK7      | 0.02 |
| NM_002512    | NME2      | 0.02 | NM_032435 | KIAA1804  | 0.02 |
| NM_006257    | PRKCQ     | 0.02 | NM_002758 | MAP2K6    | 0.02 |
| NM_032028    | STK22D    | 0.02 | NM_006282 | STK4      | 0.02 |
| NM_033050    | GPR91     | 0.02 | NM_005305 | GPR42     | 0.02 |
| NM_018939    | PCDHB6    | 0.02 | NM_003882 | WISP1     | 0.02 |
| NM_021145    | DMTF1     | 0.02 | NM_007348 | ATF6      | 0.02 |
| NM_002448    | MSX1      | 0.02 | NM_007237 | SP140     | 0.02 |
| NM_003120    | SPI1      | 0.02 | NM_000016 | ACADM     | 0.02 |
| NM_004899    | BRE       | 0.02 | NM_006284 | TAF10     | 0.02 |
| NM_005994    | TBX2      | 0.02 | NM_005589 | ALDH6A1   | 0.02 |
| NM_002012    | FHIT      | 0.02 | NM_005265 | GGT1      | 0.02 |
| NM_003286    | TOP1      | 0.02 | NM_001216 | CA9       | 0.02 |
| NM_000772    | CYP2C18   | 0.02 | NM_006623 | PHGDH     | 0.02 |
| NM_002693    | POLG      | 0.02 | NM_004161 | RAB1A     | 0.02 |
| NM_001513    | GSTZ1     | 0.02 | NM_002675 | PML       | 0.02 |
| NM_015313    | ARHGEF12  | 0.02 | NM_012175 | FBXO3     | 0.02 |
| NM_001770    | CD19      | 0.02 | NM_021230 | MLL3      | 0.02 |
| NM_014387    | LAT       | 0.02 | NM_000165 | GJA1      | 0.02 |
| NM_003394    | WNT10B    | 0.02 | NM_005037 | PPARG     | 0.02 |
| NM_018110    | DOK4      | 0.02 | NM_000807 | GABRA2    | 0.02 |
| NM_012064    | MIP       | 0.02 | NM_001103 | ACTN2     | 0.02 |

|           |           |      |           |          |      |
|-----------|-----------|------|-----------|----------|------|
| NM_000495 | COL4A5    | 0.02 | NM_133467 | CITED4   | 0.02 |
| NM_000031 | ALAD      | 0.02 | NM_001443 | FABP1    | 0.02 |
| NM_000356 | TCOF1     | 0.02 | NM_017882 | CLN6     | 0.02 |
| NM_018354 | C20ORF46  | 0.02 | NM_005853 | IRX5     | 0.02 |
| NM_003541 | HIST1H4K  | 0.02 | NM_020435 | GJA12    | 0.02 |
| NM_175747 | OLIG3     | 0.02 | NM_138702 | MAGEC3   | 0.02 |
| NM_003981 | PRC1      | 0.02 | NM_000965 | RARB     | 0.02 |
| NM_003073 | SMARCB1   | 0.02 | NM_005621 | S100A12  | 0.02 |
| NM_001785 | CDA       | 0.02 | NM_001544 | ICAM4    | 0.02 |
| NM_005333 | HCCS      | 0.02 | NM_033045 | KRTHB4   | 0.02 |
| NM_004537 | NAP1L1    | 0.02 | NM_007002 | ADRM1    | 0.02 |
| NM_080284 | ABCA6     | 0.02 | NM_003034 | SIAT8A   | 0.02 |
| NM_032021 | AD031     | 0.02 | XM_072402 | ACY1L2   | 0.02 |
| NM_003433 | ZNF132    | 0.02 | NM_021088 | ZNF2     | 0.02 |
| NM_003180 | SYT5      | 0.02 | NM_006764 | IFRD2    | 0.02 |
| NM_004863 | SPTLC2    | 0.02 | NM_003669 | INE1     | 0.02 |
| NM_014807 | TMEM24    | 0.02 | NM_012445 | SPON2    | 0.02 |
| NM_016172 | UBADC1    | 0.02 | NM_013441 | DSCR1L2  | 0.02 |
| NM_006386 | DDX17     | 0.02 | NM_006821 | ZAP128   | 0.02 |
| NM_006853 | KLK11     | 0.02 | XM_372267 | ZNF275   | 0.02 |
| NM_012190 | FTHFD     | 0.02 | NM_006866 | LILRA2   | 0.02 |
| NM_006665 | HPSE      | 0.02 | NM_015281 | KIAA1043 | 0.02 |
| NM_012217 | TPSD1     | 0.02 | NM_007352 | ELA3B    | 0.02 |
| NM_013281 | FLRT3     | 0.02 | NM_012124 | CHORDC1  | 0.02 |
| NM_014395 | DAPP1     | 0.02 | NM_014356 | C6ORF123 | 0.02 |
| NM_015960 | CUTC      | 0.02 | NM_015972 | POLR1D   | 0.02 |
| NM_153694 | SYCP3     | 0.02 | NM_013312 | HOOK2    | 0.02 |
| NM_016468 | C14ORF112 | 0.02 | NM_013337 | TIMM22   | 0.02 |
| NM_016026 | RDH11     | 0.02 | NM_016035 | COQ4     | 0.02 |
| NM_016093 | RPL26L1   | 0.02 | NM_013393 | FTSJ2    | 0.02 |
| NM_016603 | C5ORF5    | 0.02 | NM_016183 | C1ORF33  | 0.02 |
| NM_015976 | SNX7      | 0.02 | NM_017553 | KIAA1259 | 0.02 |
| NM_016438 | CLST11240 | 0.02 | NM_017521 | FEV      | 0.02 |
| NM_017789 | SEMA4C    | 0.02 | NM_018076 | ARMC4    | 0.02 |
| NM_017836 | SLC41A3   | 0.02 | NM_017850 | FLJ20508 | 0.02 |
| NM_017709 | FLJ20202  | 0.02 | NM_017807 | OSGEP    | 0.02 |
| NM_024718 | C9ORF86   | 0.02 | NM_018466 | MDS031   | 0.02 |
| NM_020228 | PRDM10    | 0.02 | NM_020787 | ZNF624   | 0.02 |
| NM_020925 | KIAA1573  | 0.02 | XM_372716 | WIZ      | 0.02 |
| NM_021633 | KLHL12    | 0.02 | NM_021183 | RAP2C    | 0.02 |
| NM_017542 | POGK      | 0.02 | NM_020895 | KIAA1533 | 0.02 |
| NM_033055 | HIAT1     | 0.02 | NM_021941 | C21ORF97 | 0.02 |
| NM_023938 | SARG      | 0.02 | XM_378187 | MGC4473  | 0.02 |
| NM_025097 | FLJ21106  | 0.02 | NM_025113 | C13ORF18 | 0.02 |
| NM_030814 | C9ORF45   | 0.02 | NM_031434 | C7ORF21  | 0.02 |
| NM_032315 | MGC4399   | 0.02 | NM_152259 | MGC45866 | 0.02 |

|              |               |      |              |              |      |
|--------------|---------------|------|--------------|--------------|------|
| NM_033064    | ATCAY         | 0.02 | NM_130468    | D4ST1        | 0.02 |
| NM_052999    | CKLFSF1       | 0.02 | NM_153754    | C21ORF88     | 0.02 |
| NM_080920    | GGTLA4        | 0.02 | XM_373760    | LOC92659     | 0.02 |
| NM_152379    | DKFZP547B1713 | 0.02 | NM_133264    | WIRE         | 0.02 |
| NM_173506    | MGC42718      | 0.02 | NM_144676    | MGC23911     | 0.02 |
| NM_153026    | PRICKLE1      | 0.02 | XM_086188    | LOC148418    | 0.02 |
| NM_145277    | HFE2          | 0.02 | NM_182524    | ZNF595       | 0.02 |
| NM_175075    | INM01         | 0.02 | NM_153608    | MGC17986     | 0.02 |
| NM_153356    | MGC34741      | 0.02 | NM_182547    | HNLF         | 0.02 |
| NM_175885    | MGC33846      | 0.02 | XM_171068    | LOC253017    | 0.02 |
| NM_152789    | MGC40405      | 0.02 | NM_148894    | FLJ33215     | 0.02 |
| NM_172131    | WFDC10B       | 0.02 | NM_173602    | FLJ34278     | 0.02 |
| NM_173622    | FLJ36674      | 0.02 | NM_178520    | FLJ38792     | 0.02 |
| XM_370932    | FLJ39639      | 0.02 | NM_173650    | DNAJC5G      | 0.02 |
| NM_198491    | FLJ44299      | 0.02 | NM_199051    | DBCCR1L      | 0.02 |
| XM_376781    | SLC10A5       | 0.02 | NM_182612    | FLJ34283     | 0.02 |
| NM_198586    | NHLRC1        | 0.02 | NM_178837    | LOC352909    | 0.02 |
| NM_198542    | MGC4728       | 0.02 | XM_114090    | LOC200019    | 0.02 |
| XM_292832    | LOC342991     | 0.02 | XM_087208    | LOC151451    | 0.02 |
| XM_292810    | LOC342970     | 0.02 | XM_072554    | LOC138729    | 0.02 |
| XM_086876    | LOC150207     | 0.02 | XM_371343    | LOC388739    | 0.02 |
| XM_375687    | LOC400734     | 0.02 | XM_371261    | LOC388642    | 0.02 |
| XM_294450    | LOC346887     | 0.02 | XM_208043    | LOC283116    | 0.02 |
| XM_208060    | LOC283257     | 0.02 | XM_373989    | LOC388959    | 0.02 |
| XM_371506    | LOC388969     | 0.02 | XM_371623    | LOC389102    | 0.02 |
| XM_379320    | LOC401177     | 0.02 | XM_374155    | LOC389358    | 0.02 |
| XM_374159    | LOC389362     | 0.02 | XM_377875    | LOC402199    | 0.02 |
| XM_379584    | LOC401463     | 0.02 | XM_373308    | LOC392376    | 0.02 |
| XM_373602    | LOC388006     | 0.02 | XM_378363    | LOC400047    | 0.02 |
| XM_374355    | LOC390565     | 0.02 | XM_378621    | LOC400551    | 0.02 |
| XM_378582    | LOC400523     | 0.02 | XM_378650    | LOC400575    | 0.02 |
| NM_001004714 | OR4K13        | 0.02 | NM_001005205 | OR8J1        | 0.02 |
| NM_001005279 | OR6K2         | 0.02 | NM_001003665 | DKFZP761P211 | 0.02 |
| NM_001003750 | OR8I2         | 0.02 | NM_001565    | CXCL10       | 0.03 |
| NM_144685    | HIPK4         | 0.03 | NM_016586    | MBIP         | 0.03 |
| NM_000245    | MET           | 0.03 | NM_000710    | BDKRB1       | 0.03 |
| NM_005307    | GRK4          | 0.03 | NM_012344    | NTSR2        | 0.03 |
| NM_003702    | RGS20         | 0.03 | NM_005166    | APLP1        | 0.03 |
| NM_000174    | GP9           | 0.03 | NM_002623    | PFDN4        | 0.03 |
| NM_033288    | ZNF160        | 0.03 | NM_014323    | ZNF278       | 0.03 |
| NM_001452    | FOXF2         | 0.03 | NM_005962    | MXI1         | 0.03 |
| NM_002228    | JUN           | 0.03 | NM_005360    | MAF          | 0.03 |
| NM_021615    | CHST6         | 0.03 | NM_006025    | P11          | 0.03 |
| NM_002299    | LCT           | 0.03 | NM_001984    | ESD          | 0.03 |
| NM_003837    | FBP2          | 0.03 | NM_005865    | PRSS16       | 0.03 |
| NM_019076    | UGT1A8        | 0.03 | NM_003216    | TEF          | 0.03 |

|           |           |      |           |              |      |
|-----------|-----------|------|-----------|--------------|------|
| NM_021822 | APOBEC3G  | 0.03 | NM_000499 | CYP1A1       | 0.03 |
| NM_002422 | MMP3      | 0.03 | NM_004564 | PET112L      | 0.03 |
| NM_024117 | MAPKAP1   | 0.03 | NM_005369 | MCF2         | 0.03 |
| NM_004210 | NEURL     | 0.03 | NM_005055 | RAPSN        | 0.03 |
| NM_006287 | TFPI      | 0.03 | NM_002938 | RNF4         | 0.03 |
| NM_005852 | CHD3      | 0.03 | NM_000795 | DRD2         | 0.03 |
| AF174606  | SHFM3P1   | 0.03 | NM_003620 | PPM1D        | 0.03 |
| NM_006080 | SEMA3A    | 0.03 | NM_006748 | SLA          | 0.03 |
| NM_003326 | TNFSF4    | 0.03 | NM_003037 | SLAMF1       | 0.03 |
| NM_001996 | FBLN1     | 0.03 | NM_001651 | AQP5         | 0.03 |
| NM_001149 | ANK3      | 0.03 | NM_012316 | KPNA6        | 0.03 |
| NM_016277 | RAB23     | 0.03 | NM_021734 | SLC25A19     | 0.03 |
| NM_003459 | SLC30A3   | 0.03 | NM_000111 | SLC26A3      | 0.03 |
| NM_004414 | DSCR1     | 0.03 | NM_005340 | HINT1        | 0.03 |
| NM_018972 | GDAP1     | 0.03 | NM_002621 | PFC          | 0.03 |
| NM_002354 | TACSTD1   | 0.03 | XM_374831 | SH3MD1       | 0.03 |
| NM_006989 | RASA4     | 0.03 | NM_004038 | AMY1A        | 0.03 |
| NM_001897 | CSPG4     | 0.03 | NM_005893 | CCIN         | 0.03 |
| NM_001684 | ATP2B4    | 0.03 | NM_001509 | GPX5         | 0.03 |
| NM_024017 | HOXB9     | 0.03 | NM_002465 | MYBPC1       | 0.03 |
| NM_005367 | MAGEA12   | 0.03 | NM_002488 | NDUFA2       | 0.03 |
| NM_004542 | NDUFA3    | 0.03 | NM_002409 | MGAT3        | 0.03 |
| NM_015657 | ABCA12    | 0.03 | NM_003044 | SLC6A12      | 0.03 |
| NM_003007 | SEMG1     | 0.03 | NM_018412 | ST7          | 0.03 |
| NM_021114 | SPINK2    | 0.03 | NM_003321 | TUFM         | 0.03 |
| NM_007003 | GAGEC1    | 0.03 | NM_004851 | NAPSA        | 0.03 |
| XM_371227 | CROCC     | 0.03 | NM_005498 | AP1M2        | 0.03 |
| NM_014751 | MTSS1     | 0.03 | XM_375837 | FAM34A       | 0.03 |
| NM_006636 | MTHFD2    | 0.03 | NM_014599 | MAGED2       | 0.03 |
| NM_015116 | LRCH1     | 0.03 | XM_035825 | KIAA0143     | 0.03 |
| NM_032182 | KIAA0157  | 0.03 | XM_166573 | KIAA0895     | 0.03 |
| NM_015493 | ANKRD25   | 0.03 | XM_166254 | ODZ4         | 0.03 |
| NM_013272 | SLCO3A1   | 0.03 | NM_024684 | PTD015       | 0.03 |
| NM_015631 | C10ORF61  | 0.03 | XM_372774 | DJ159A19.3   | 0.03 |
| NM_014181 | HSPC159   | 0.03 | NM_173467 | MT           | 0.03 |
| NM_013268 | LGALS13   | 0.03 | NM_014367 | E2IG5        | 0.03 |
| NM_014552 | TFCP2L2   | 0.03 | NM_016100 | NAT5         | 0.03 |
| NM_016582 | SLC15A3   | 0.03 | NM_015886 | PI15         | 0.03 |
| NM_181354 | OXR1      | 0.03 | NM_018015 | FLJ10178     | 0.03 |
| NM_018017 | C10ORF118 | 0.03 | NM_018194 | MART2        | 0.03 |
| NM_018307 | RHOT1     | 0.03 | NM_015492 | DKFZP434H132 | 0.03 |
| NM_020187 | DC12      | 0.03 | NM_020425 | C6ORF162     | 0.03 |
| XM_375085 | KIAA1393  | 0.03 | NM_020693 | DSCAML1      | 0.03 |
| XM_049351 | KIAA1600  | 0.03 | NM_020834 | KIAA1443     | 0.03 |
| XM_044178 | KIAA1211  | 0.03 | NM_021810 | CDH26        | 0.03 |
| NM_021814 | ELOVL5    | 0.03 | NM_022779 | DDX31        | 0.03 |

|           |           |      |              |           |      |
|-----------|-----------|------|--------------|-----------|------|
| NM_022481 | CENTD3    | 0.03 | NM_022823    | FNDC4     | 0.03 |
| NM_022145 | FKSG14    | 0.03 | NM_024033    | MGC5242   | 0.03 |
| NM_024332 | CXORF53   | 0.03 | NM_024593    | FLJ11767  | 0.03 |
| NM_024312 | MGC4170   | 0.03 | NM_024811    | FLJ12529  | 0.03 |
| NM_024816 | RABEP2    | 0.03 | NM_153448    | ESX1L     | 0.03 |
| NM_024986 | FLJ12331  | 0.03 | NM_025082    | FLJ13111  | 0.03 |
| NM_030917 | FIP1L1    | 0.03 | NM_031285    | PP1057    | 0.03 |
| NM_030966 | KRTAP1-3  | 0.03 | NM_032573    | TSP-NY    | 0.03 |
| NM_032367 | ZBED3     | 0.03 | NM_032566    | ECG2      | 0.03 |
| NM_032883 | C20ORF100 | 0.03 | NM_033112    | C6ORF153  | 0.03 |
| NM_052875 | MGC10485  | 0.03 | NM_033438    | SLAMF9    | 0.03 |
| NM_139160 | LOC91614  | 0.03 | NM_177402    | SYT2      | 0.03 |
| NM_080741 | NEU4      | 0.03 | XM_378419    | LOC144766 | 0.03 |
| NM_017873 | ASB6      | 0.03 | NM_153221    | CILP2     | 0.03 |
| NM_175878 | MGC57211  | 0.03 | NM_144709    | FLJ32312  | 0.03 |
| NM_144720 | MARLIN1   | 0.03 | NM_178840    | MGC24047  | 0.03 |
| XM_379651 | C9ORF44   | 0.03 | NM_153330    | DNAJB8    | 0.03 |
| NM_173533 | TDRD5     | 0.03 | NM_152629    | ZNF515    | 0.03 |
| NM_152732 | C6ORF206  | 0.03 | NM_173545    | C2ORF13   | 0.03 |
| NM_181784 | SPRED2    | 0.03 | NM_152763    | MGC26989  | 0.03 |
| XM_208524 | LOC283129 | 0.03 | NM_172239    | GOR       | 0.03 |
| NM_153376 | FLJ90575  | 0.03 | XM_378452    | LOC253970 | 0.03 |
| NM_173632 | FLJ38288  | 0.03 | NM_176782    | MGC27169  | 0.03 |
| XM_378374 | LOC338809 | 0.03 | XM_210048    | LOC286436 | 0.03 |
| NM_178173 | LOC339834 | 0.03 | NM_198550    | FLJ36760  | 0.03 |
| NM_198552 | MGC15887  | 0.03 | XM_294370    | GNAT3     | 0.03 |
| XM_371809 | C6ORF205  | 0.03 | NM_203349    | RALP      | 0.03 |
| NM_207454 | FLJ44815  | 0.03 | NM_207457    | FLJ46126  | 0.03 |
| XM_089384 | LOC164118 | 0.03 | XM_293405    | LOC340595 | 0.03 |
| XM_293332 | LOC340549 | 0.03 | XM_291208    | LOC340246 | 0.03 |
| XM_084852 | LOC144404 | 0.03 | XM_166926    | LOC219968 | 0.03 |
| XM_371269 | LOC388650 | 0.03 | XM_066690    | LOC139425 | 0.03 |
| XM_378841 | LOC400741 | 0.03 | XM_371479    | LOC388928 | 0.03 |
| XM_371639 | LOC389118 | 0.03 | XM_377797    | LOC402123 | 0.03 |
| XM_379243 | LOC401106 | 0.03 | XM_374029    | LOC389089 | 0.03 |
| XM_371666 | LOC389152 | 0.03 | XM_371797    | LOC389365 | 0.03 |
| XM_379398 | LOC401237 | 0.03 | XM_380089    | LOC402463 | 0.03 |
| XM_380034 | LOC402687 | 0.03 | XM_373243    | LOC392197 | 0.03 |
| XM_372330 | LOC390009 | 0.03 | XM_373453    | LOC387654 | 0.03 |
| XM_373558 | LOC387903 | 0.03 | XM_370939    | LOC388221 | 0.03 |
| XM_375434 | LOC400590 | 0.03 | NM_001002760 | BPY2B     | 0.03 |
| XM_380128 | LOC402563 | 0.03 | NM_213656    | KA35      | 0.03 |
| NM_017593 | BMP2K     | 0.04 | NM_005232    | EPHA1     | 0.04 |
| NM_000675 | ADORA2A   | 0.04 | NM_001462    | FPRL1     | 0.04 |
| NM_020061 | OPN1LW    | 0.04 | NM_005998    | CCT3      | 0.04 |
| NM_006194 | PAX9      | 0.04 | NM_018901    | PCDHA10   | 0.04 |

|           |          |      |           |              |      |
|-----------|----------|------|-----------|--------------|------|
| NM_004364 | CEBPA    | 0.04 | NM_004509 | SP110        | 0.04 |
| NM_001063 | TF       | 0.04 | NM_017410 | HOXC13       | 0.04 |
| NM_002199 | IRF2     | 0.04 | NM_013432 | NFKBIL2      | 0.04 |
| NM_012114 | CASP14   | 0.04 | NM_001907 | CTRL         | 0.04 |
| NM_004092 | ECHS1    | 0.04 | NM_006895 | HNMT         | 0.04 |
| NM_004531 | MOCS2    | 0.04 | NM_000511 | FUT2         | 0.04 |
| NM_003251 | THRSP    | 0.04 | NM_003968 | UBE1C        | 0.04 |
| NM_003641 | IFITM1   | 0.04 | NM_003587 | DHX16        | 0.04 |
| NM_031915 | SETDB2   | 0.04 | NM_006999 | POLS         | 0.04 |
| NM_003626 | PPFIA1   | 0.04 | NM_004458 | ACSL4        | 0.04 |
| NM_024670 | SUV39H2  | 0.04 | NM_000108 | DLD          | 0.04 |
| NM_000627 | LTBP1    | 0.04 | NM_002890 | RASA1        | 0.04 |
| NM_002605 | PDE8A    | 0.04 | NM_000624 | SERPINA5     | 0.04 |
| NM_007144 | RNF110   | 0.04 | NM_032663 | USP30        | 0.04 |
| NM_002055 | GFAP     | 0.04 | NM_000486 | AQP2         | 0.04 |
| NM_004183 | VMD2     | 0.04 | NM_001134 | AFP          | 0.04 |
| NM_022449 | RAB17    | 0.04 | NM_015986 | CRLF3        | 0.04 |
| NM_152277 | DC-UBP   | 0.04 | NM_021631 | FKSG2        | 0.04 |
| NM_006204 | PDE6C    | 0.04 | NM_002701 | POU5F1       | 0.04 |
| NM_000339 | SLC12A3  | 0.04 | NM_014426 | SNX5         | 0.04 |
| NM_006379 | SEMA3C   | 0.04 | NM_021914 | CFL2         | 0.04 |
| NM_001299 | CNN1     | 0.04 | NM_001633 | AMBP         | 0.04 |
| NM_004928 | C21ORF2  | 0.04 | NM_001219 | CALU         | 0.04 |
| NM_000778 | CYP4A11  | 0.04 | NM_014618 | DBC1         | 0.04 |
| NM_002248 | KCNN1    | 0.04 | NM_002283 | KRTHB5       | 0.04 |
| NM_006233 | POLR2I   | 0.04 | NM_021049 | MAGEA5       | 0.04 |
| NM_005692 | ABCF2    | 0.04 | NM_007188 | ABCB8        | 0.04 |
| NM_002663 | PLD2     | 0.04 | NM_002927 | RGS13        | 0.04 |
| NM_006011 | SIAT8B   | 0.04 | NM_005452 | C6ORF11      | 0.04 |
| NM_003705 | SLC25A12 | 0.04 | NM_004917 | KLK4         | 0.04 |
| NM_003765 | STX10    | 0.04 | NM_014650 | ZNF432       | 0.04 |
| NM_014763 | MRPL19   | 0.04 | NM_005801 | SUI1         | 0.04 |
| NM_007184 | NISCH    | 0.04 | NM_022042 | SLC26A1      | 0.04 |
| NM_006550 | FSBP     | 0.04 | NM_015140 | KIAA0153     | 0.04 |
| XM_043118 | KIAA0286 | 0.04 | NM_012100 | DNPEP        | 0.04 |
| NM_012071 | COMMD3   | 0.04 | NM_014291 | GCAT         | 0.04 |
| NM_018094 | GSPT2    | 0.04 | XM_044334 | KIAA0318     | 0.04 |
| NM_014184 | HSPC163  | 0.04 | NM_017527 | LY6K         | 0.04 |
| NM_018013 | FLJ10159 | 0.04 | NM_018154 | ASF1B        | 0.04 |
| XM_371575 | FNBP3    | 0.04 | NM_018371 | CHGN         | 0.04 |
| NM_018285 | C15ORF12 | 0.04 | NM_017987 | RUFY2        | 0.04 |
| NM_021729 | VPS11    | 0.04 | NM_018704 | DKFZP547A023 | 0.04 |
| XM_035601 | DLGAP3   | 0.04 | NM_015409 | EP400        | 0.04 |
| NM_021182 | HB-1     | 0.04 | NM_032476 | MRPS6        | 0.04 |
| NM_022092 | CHTF18   | 0.04 | NM_022783 | DEPDC6       | 0.04 |
| NM_023927 | NS3TP2   | 0.04 | NM_023932 | EGFL9        | 0.04 |

|              |           |      |              |               |      |
|--------------|-----------|------|--------------|---------------|------|
| NM_022489    | FLJ22056  | 0.04 | NM_024615    | FLJ21308      | 0.04 |
| NM_024749    | FLJ12505  | 0.04 | NM_018527    | FLJ22054      | 0.04 |
| NM_025128    | MUS81     | 0.04 | NM_025181    | SLC35F5       | 0.04 |
| NM_024915    | TFCP2L3   | 0.04 | NM_032137    | DKFZP434N1817 | 0.04 |
| NM_030821    | PLA2G12A  | 0.04 | NM_030918    | SNX27         | 0.04 |
| NM_031924    | RSHL2     | 0.04 | NM_031937    | TBC1D10       | 0.04 |
| NM_031210    | C14ORF156 | 0.04 | NM_032265    | ZMYND15       | 0.04 |
| NM_032785    | FLJ14442  | 0.04 | NM_031961    | KRTAP9-2      | 0.04 |
| NM_033280    | LOC90701  | 0.04 | NM_152347    | FLJ40342      | 0.04 |
| NM_152412    | ZNF572    | 0.04 | NM_152383    | MGC42174      | 0.04 |
| XM_375404    | C17ORF38  | 0.04 | NM_012363    | OR1N1         | 0.04 |
| NM_080878    | ITLN2     | 0.04 | NM_144686    | TMC4          | 0.04 |
| NM_153812    | PHF13     | 0.04 | XM_371619    | FGD5          | 0.04 |
| NM_001001661 | LOC155054 | 0.04 | NM_152562    | CDCA2         | 0.04 |
| NM_133637    | DQX1      | 0.04 | NM_152610    | FLJ35728      | 0.04 |
| NM_203498    | FLJ23865  | 0.04 | NM_147194    | MGC35361      | 0.04 |
| NM_173565    | LOC222967 | 0.04 | XM_378211    | LOC254312     | 0.04 |
| XM_374069    | LOC254808 | 0.04 | NM_173579    | FLJ40224      | 0.04 |
| NM_152771    | MGC39696  | 0.04 | NM_173855    | LOC283385     | 0.04 |
| XM_379514    | LOC340340 | 0.04 | XM_373440    | CSS3          | 0.04 |
| XM_291322    | KIAA2001  | 0.04 | NM_198506    | FLJ44691      | 0.04 |
| NM_198521    | FLJ25323  | 0.04 | XM_379203    | LOC348801     | 0.04 |
| NM_198285    | LOC349136 | 0.04 | NM_207409    | UNQ3045       | 0.04 |
| XM_117224    | LOC200312 | 0.04 | XM_373883    | LOC388731     | 0.04 |
| XM_377579    | LOC401945 | 0.04 | XM_373837    | LOC388616     | 0.04 |
| XM_374023    | LOC389071 | 0.04 | XM_374130    | LOC389310     | 0.04 |
| XM_376342    | LOC401154 | 0.04 | XM_374088    | LOC389230     | 0.04 |
| XM_371741    | LOC389293 | 0.04 | XM_379327    | LOC401182     | 0.04 |
| XM_374099    | LOC389247 | 0.04 | XM_374734    | LOC392726     | 0.04 |
| XM_378456    | LOC400212 | 0.04 | XM_370597    | LOC387733     | 0.04 |
| XM_370542    | LOC387648 | 0.04 | XM_373632    | LOC388131     | 0.04 |
| XM_378523    | LOC400388 | 0.04 | XM_378545    | LOC400456     | 0.04 |
| XM_375272    | LOC400468 | 0.04 | XM_373653    | LOC388193     | 0.04 |
| NM_001001850 | MGC21382  | 0.04 | NM_001005214 | FLJ25811      | 0.04 |
| XM_372213    | USP27X    | 0.04 | NM_001004064 | OR8J3         | 0.04 |
| NM_001005567 | OR51B5    | 0.04 | NM_022766    | CERK          | 0.05 |
| NM_001825    | CKMT2     | 0.05 | NM_004071    | CLK1          | 0.05 |
| NM_013302    | EEF2K     | 0.05 | NM_002755    | MAP2K1        | 0.05 |
| NM_152529    | GPR155    | 0.05 | NM_017719    | SNRK          | 0.05 |
| NM_003565    | ULK1      | 0.05 | NM_004226    | STK17B        | 0.05 |
| NM_175911    | MGC40047  | 0.05 | NM_139209    | GRK7          | 0.05 |
| NM_145242    | LOC115131 | 0.05 | NM_023919    | TAS2R7        | 0.05 |
| NM_001707    | BCL7B     | 0.05 | NM_006834    | RAB32         | 0.05 |
| NM_014836    | RHOBTB1   | 0.05 | NM_000425    | L1CAM         | 0.05 |
| NM_001804    | CDX1      | 0.05 | NM_133476    | ZNF384        | 0.05 |
| NM_022363    | LHX5      | 0.05 | NM_005149    | TBX19         | 0.05 |

|           |           |      |           |              |      |
|-----------|-----------|------|-----------|--------------|------|
| NM_152910 | DGKH      | 0.05 | NM_025211 | GKAP1        | 0.05 |
| NM_000408 | GPD2      | 0.05 | NM_024119 | LGP2         | 0.05 |
| NM_020315 | PDXP      | 0.05 | NM_005809 | PRDX2        | 0.05 |
| NM_016442 | ARTS-1    | 0.05 | NM_000175 | GPI          | 0.05 |
| NM_001527 | HDAC2     | 0.05 | NM_021111 | RECK         | 0.05 |
| NM_005798 | RFP2      | 0.05 | NM_182488 | USP12        | 0.05 |
| NM_003357 | SCGB1A1   | 0.05 | NM_139245 | PPM1L        | 0.05 |
| NM_000610 | CD44      | 0.05 | NM_004898 | CLOCK        | 0.05 |
| NM_003877 | SOCS2     | 0.05 | NM_014249 | NR2E3        | 0.05 |
| NM_002291 | LAMB1     | 0.05 | NM_001170 | AQP7         | 0.05 |
| NM_001666 | ARHGAP4   | 0.05 | NM_002476 | MYL4         | 0.05 |
| NM_005775 | SCAM-1    | 0.05 | NM_001104 | ACTN3        | 0.05 |
| NM_002095 | GTF2E2    | 0.05 | NM_002247 | KCNMA1       | 0.05 |
| NM_001234 | CAV3      | 0.05 | XM_370947 | ERN2         | 0.05 |
| NM_018068 | PIWIL2    | 0.05 | NM_016445 | PLEK2        | 0.05 |
| NM_006269 | RP1       | 0.05 | NM_003035 | SIL          | 0.05 |
| NM_080867 | SOCS4     | 0.05 | NM_012416 | RANBP6       | 0.05 |
| NM_015490 | SEC31L2   | 0.05 | NM_001516 | GTF2H3       | 0.05 |
| NM_004477 | FRG1      | 0.05 | NM_018284 | GBP3         | 0.05 |
| NM_005558 | LAD1      | 0.05 | NM_024016 | HOXB8        | 0.05 |
| NM_004997 | MYBPH     | 0.05 | NM_018436 | ALLC         | 0.05 |
| NM_144650 | ADHFE1    | 0.05 | NM_002915 | RFC3         | 0.05 |
| NM_003057 | SLC22A1   | 0.05 | NM_203288 | RP9          | 0.05 |
| NM_003983 | SLC7A6    | 0.05 | NM_004711 | SYNGR1       | 0.05 |
| NM_014723 | SNPH      | 0.05 | NM_014734 | KIAA0247     | 0.05 |
| NM_014314 | DDX58     | 0.05 | NM_015559 | SETBP1       | 0.05 |
| NM_020999 | NEUROG3   | 0.05 | NM_018141 | MRPS10       | 0.05 |
| NM_017998 | C9ORF40   | 0.05 | XM_371595 | DOCK10       | 0.05 |
| NM_018320 | RNF121    | 0.05 | NM_018346 | FLJ11164     | 0.05 |
| XM_033853 | ZNF630    | 0.05 | NM_020924 | ZBTB26       | 0.05 |
| NM_022059 | CXCL16    | 0.05 | NM_021937 | SELB         | 0.05 |
| NM_022100 | MRPS14    | 0.05 | NM_022463 | NXN          | 0.05 |
| NM_022154 | SLC39A8   | 0.05 | NM_030789 | HM13         | 0.05 |
| NM_053005 | HCCA2     | 0.05 | XM_375153 | DKFZP547L112 | 0.05 |
| NM_030972 | ZNF611    | 0.05 | NM_032310 | C9ORF89      | 0.05 |
| XM_040486 | KIAA1789  | 0.05 | NM_032600 | NYD-SP17     | 0.05 |
| NM_031922 | REPS1     | 0.05 | NM_144580 | MGC31963     | 0.05 |
| NM_153034 | ZNF488    | 0.05 | XM_059702 | FLJ36748     | 0.05 |
| NM_152424 | FLJ39827  | 0.05 | NM_152512 | FLJ25421     | 0.05 |
| NM_147193 | FLJ36155  | 0.05 | NM_152596 | MGC33637     | 0.05 |
| NM_207337 | LOC196394 | 0.05 | NM_173540 | FUT11        | 0.05 |
| NM_174917 | LOC197322 | 0.05 | NM_153368 | CX40.1       | 0.05 |
| NM_198465 | NRK       | 0.05 | XM_375334 | LOC283901    | 0.05 |
| XM_208333 | MGC48637  | 0.05 | NM_173086 | KRT6E        | 0.05 |
| NM_175739 | SERPINA9  | 0.05 | XM_352847 | LOC340529    | 0.05 |
| NM_182971 | COX8C     | 0.05 | NM_203370 | LOC389119    | 0.05 |



|           |              |      |           |              |      |
|-----------|--------------|------|-----------|--------------|------|
| NM_198695 | KRTAP18-8    | 0.05 | NM_207490 | FLJ45721     | 0.05 |
| XM_060171 | LOC126772    | 0.05 | NM_207450 | FLJ27243     | 0.05 |
| XM_065050 | LOC126370    | 0.05 | XM_295257 | LOC340477    | 0.05 |
| XM_373059 | LOC391747    | 0.05 | XM_374202 | LOC401303    | 0.05 |
| XM_372099 | LOC389737    | 0.05 | XM_373550 | LOC387888    | 0.05 |
| XM_373560 | LOC387910    | 0.05 | XM_373570 | LOC387939    | 0.05 |
| XM_373505 | LOC387783    | 0.05 | XM_371117 | LOC388476    | 0.05 |
| XM_373382 | LOC392563    | 0.05 | XM_377713 | LOC402055    | 0.05 |
| NM_173351 | OR6B3        | 0.05 | NM_004442 | EPHB2        | 0.06 |
| NM_001569 | IRAK1        | 0.06 | NM_025194 | ITPKC        | 0.06 |
| NM_006641 | CCR9         | 0.06 | NM_019897 | OR2S2        | 0.06 |
| NM_005682 | GPR56        | 0.06 | NM_004282 | BAG2         | 0.06 |
| NM_012068 | ATF5         | 0.06 | NM_005652 | TERF2        | 0.06 |
| NM_005251 | FOXC2        | 0.06 | NM_016169 | SUFU         | 0.06 |
| NM_003199 | TCF4         | 0.06 | NM_014256 | B3GNT3       | 0.06 |
| NM_020664 | DECR2        | 0.06 | NM_002201 | ISG20        | 0.06 |
| NM_022132 | MCCC2        | 0.06 | NM_006903 | PPA2         | 0.06 |
| NM_000156 | GAMT         | 0.06 | NM_003282 | TNNI2        | 0.06 |
| NM_018417 | SAC          | 0.06 | NM_003360 | UGT8         | 0.06 |
| NM_015547 | THEA         | 0.06 | NM_022085 | TXNDC5       | 0.06 |
| NM_014254 | TMEM5        | 0.06 | NM_002872 | RAC2         | 0.06 |
| NM_001983 | ERCC1        | 0.06 | NM_004218 | RAB11B       | 0.06 |
| NM_006087 | TUBB5        | 0.06 | NM_024524 | AFURS1       | 0.06 |
| NM_006154 | NEDD4        | 0.06 | NM_006140 | CSF2RA       | 0.06 |
| NM_198402 | PTPLB        | 0.06 | NM_080876 | DUSP19       | 0.06 |
| NM_004186 | SEMA3F       | 0.06 | NM_003839 | TNFRSF11A    | 0.06 |
| NM_002514 | NOV          | 0.06 | NM_005585 | SMAD6        | 0.06 |
| NM_019851 | FGF20        | 0.06 | NM_000037 | ANK1         | 0.06 |
| NM_003051 | SLC16A1      | 0.06 | NM_000558 | HBA1         | 0.06 |
| NM_080626 | BRI3BP       | 0.06 | NM_005106 | DLEC1        | 0.06 |
| NM_001975 | ENO2         | 0.06 | NM_152653 | UBE2E2       | 0.06 |
| NM_003897 | IER3         | 0.06 | NM_000278 | PAX2         | 0.06 |
| NM_002439 | MSH3         | 0.06 | NM_001829 | CLCN3        | 0.06 |
| NM_001448 | GPC4         | 0.06 | NM_005548 | KARS         | 0.06 |
| NM_178120 | DLX1         | 0.06 | NM_004797 | ACDC         | 0.06 |
| NM_002630 | PGC          | 0.06 | NM_006159 | NELL2        | 0.06 |
| NM_005386 | NNAT         | 0.06 | NM_020186 | ACN9         | 0.06 |
| NM_019848 | SLC10A3      | 0.06 | NM_003734 | AOC3         | 0.06 |
| NM_153683 | KL           | 0.06 | NM_004729 | ZBED1        | 0.06 |
| NM_005830 | MRPS31       | 0.06 | XM_376647 | SEMA3E       | 0.06 |
| NM_005494 | DNAJB6       | 0.06 | XM_376540 | PHACTR2      | 0.06 |
| NM_014869 | KIAA0763     | 0.06 | NM_007176 | C14ORF1      | 0.06 |
| NM_006416 | SLC35A1      | 0.06 | NM_007242 | DDX19        | 0.06 |
| NM_015415 | DKFZP564B167 | 0.06 | NM_015594 | DKFZP434O047 | 0.06 |
| NM_013363 | PCOLCE2      | 0.06 | NM_152414 | BHLHB5       | 0.06 |
| NM_014408 | TRAPPC3      | 0.06 | NM_014428 | TJP3         | 0.06 |

|              |              |      |              |           |      |
|--------------|--------------|------|--------------|-----------|------|
| NM_015873    | VILL         | 0.06 | NM_016526    | BET1L     | 0.06 |
| NM_017748    | FLJ20291     | 0.06 | NM_017956    | FLJ20772  | 0.06 |
| NM_017957    | EPN3         | 0.06 | NM_017996    | DET1      | 0.06 |
| NM_017860    | FLJ20519     | 0.06 | NM_018171    | DIP13B    | 0.06 |
| NM_018292    | QRSL1        | 0.06 | NM_020178    | CA10      | 0.06 |
| NM_020970    | KIAA1641     | 0.06 | NM_021831    | FLJ21839  | 0.06 |
| NM_024325    | MGC10715     | 0.06 | NM_024713    | FLJ22557  | 0.06 |
| NM_024309    | TNIP2        | 0.06 | NM_024870    | DEPDC2    | 0.06 |
| NM_030770    | TMPRSS5      | 0.06 | NM_024913    | FLJ21986  | 0.06 |
| NM_031917    | ANGPTL6      | 0.06 | NM_032024    | C10ORF11  | 0.06 |
| NM_032042    | DKFZP564D172 | 0.06 | XM_038436    | KIAA1786  | 0.06 |
| NM_133443    | GPT2         | 0.06 | NM_080650    | MGC14798  | 0.06 |
| NM_152362    | MGC17791     | 0.06 | NM_133261    | GIPC3     | 0.06 |
| NM_138807    | LOC132001    | 0.06 | NM_173494    | MGC35261  | 0.06 |
| NM_138963    | RPS4Y2       | 0.06 | NM_153355    | TCBA1     | 0.06 |
| NM_152527    | SLC16A14     | 0.06 | XM_375358    | FLJ25339  | 0.06 |
| NM_153246    | MGC45491     | 0.06 | NM_145756    | ZNF396    | 0.06 |
| NM_182552    | MGC43690     | 0.06 | NM_182568    | FLJ36492  | 0.06 |
| XM_113978    | LOC284352    | 0.06 | NM_181614    | KRTAP19-7 | 0.06 |
| NM_183241    | LOC286257    | 0.06 | NM_198943    | MGC52000  | 0.06 |
| XM_379551    | LOC349196    | 0.06 | NM_207430    | FLJ46266  | 0.06 |
| XM_211086    | LOC283553    | 0.06 | NM_207442    | FLJ39779  | 0.06 |
| NM_206833    | CTXN1        | 0.06 | XM_292820    | LOC342979 | 0.06 |
| XM_114222    | LOC200373    | 0.06 | XM_097753    | LOC149913 | 0.06 |
| XM_295091    | LOC339875    | 0.06 | XM_209824    | LOC285929 | 0.06 |
| XM_088684    | LOC158830    | 0.06 | XM_211040    | LOC283440 | 0.06 |
| XM_377555    | LOC401934    | 0.06 | XM_374007    | LOC389029 | 0.06 |
| XM_374059    | LOC389163    | 0.06 | XM_374066    | LOC389184 | 0.06 |
| XM_373249    | LOC392217    | 0.06 | XM_372102    | LOC389742 | 0.06 |
| XM_370835    | LOC388078    | 0.06 | XM_373812    | LOC388568 | 0.06 |
| NM_001001674 | OR4F15       | 0.06 | NM_001005237 | OR51G1    | 0.06 |
| NM_001726    | BRDT         | 0.07 | NM_002754    | MAPK13    | 0.07 |
| NM_000677    | ADORA3       | 0.07 | NM_000706    | AVPR1A    | 0.07 |
| NM_080818    | GPR80        | 0.07 | NM_013937    | OR11A1    | 0.07 |
| NM_015032    | APRIN        | 0.07 | NM_001746    | CANX      | 0.07 |
| NM_001520    | GTF3C1       | 0.07 | NM_004819    | SYMPK     | 0.07 |
| NM_006167    | NKX3-1       | 0.07 | NM_005919    | MEF2B     | 0.07 |
| NM_000032    | ALAS2        | 0.07 | NM_002573    | PAFAH1B3  | 0.07 |
| NM_004453    | ETFDH        | 0.07 | NM_000364    | TNNT2     | 0.07 |
| NM_003273    | TM7SF2       | 0.07 | NM_006660    | CLPX      | 0.07 |
| NM_002423    | MMP7         | 0.07 | XM_086650    | PPP4R1L   | 0.07 |
| NM_002828    | PTPN2        | 0.07 | NM_018299    | FLJ11011  | 0.07 |
| NM_032603    | LOXL3        | 0.07 | NM_003979    | RAI3      | 0.07 |
| NM_005215    | DCC          | 0.07 | NM_005401    | PTPN14    | 0.07 |
| NM_004844    | SH3BP5       | 0.07 | NM_006850    | IL24      | 0.07 |
| NM_002957    | RXRA         | 0.07 | NM_003867    | FGF17     | 0.07 |

|           |           |      |           |               |      |
|-----------|-----------|------|-----------|---------------|------|
| NM_004140 | LLGL1     | 0.07 | NM_007234 | DCTN3         | 0.07 |
| NM_002268 | KPNA4     | 0.07 | NM_000112 | SLC26A2       | 0.07 |
| NM_003388 | CYLN2     | 0.07 | NM_001239 | CCNH          | 0.07 |
| NM_015344 | LEPROTL1  | 0.07 | NM_173470 | LOC93380      | 0.07 |
| NM_002158 | HTLF      | 0.07 | NM_005742 | TXNDC7        | 0.07 |
| NM_005831 | NDP52     | 0.07 | NM_018702 | ADARB2        | 0.07 |
| NM_001830 | CLCN4     | 0.07 | NM_000717 | CA4           | 0.07 |
| NM_004317 | ASNA1     | 0.07 | NM_020991 | CSH2          | 0.07 |
| NM_002620 | PF4V1     | 0.07 | NM_005083 | U2AF1L1       | 0.07 |
| NM_004886 | APBA3     | 0.07 | NM_003787 | NOL4          | 0.07 |
| NM_005463 | HNRPDL    | 0.07 | NM_006040 | HS3ST4        | 0.07 |
| NM_006355 | TRIM38    | 0.07 | NM_007224 | NXPH4         | 0.07 |
| NM_012437 | SNAPAP    | 0.07 | NM_015537 | NELF          | 0.07 |
| NM_015441 | OLFML2B   | 0.07 | XM_371960 | KIAA1277      | 0.07 |
| NM_012449 | STEAP     | 0.07 | NM_015990 | KLHL5         | 0.07 |
| NM_013386 | SLC25A24  | 0.07 | NM_014591 | KCNIP2        | 0.07 |
| NM_014306 | HSPC117   | 0.07 | NM_018078 | FLJ10378      | 0.07 |
| NM_017712 | PGPEP1    | 0.07 | NM_018696 | ELAC1         | 0.07 |
| NM_019854 | HRMT1L4   | 0.07 | XM_049695 | VANGL2        | 0.07 |
| NM_020815 | PCDH10    | 0.07 | NM_020973 | GBA3          | 0.07 |
| NM_033051 | TSCOT     | 0.07 | NM_022372 | GBL           | 0.07 |
| NM_024067 | C7ORF26   | 0.07 | NM_024898 | FAM31C        | 0.07 |
| NM_030802 | LOC81558  | 0.07 | NM_032164 | ZNF394        | 0.07 |
| NM_031484 | MRVLDC1   | 0.07 | NM_032273 | DKFZP586C1924 | 0.07 |
| NM_032728 | C9ORF67   | 0.07 | XM_030896 | LOC90321      | 0.07 |
| NM_145232 | LOC90353  | 0.07 | NM_052891 | PGLYRP3       | 0.07 |
| XM_376008 | LOC91464  | 0.07 | NM_138779 | LOC93081      | 0.07 |
| NM_139241 | FGD4      | 0.07 | NM_153217 | MGC13034      | 0.07 |
| NM_138571 | HINT3     | 0.07 | NM_032625 | C7ORF13       | 0.07 |
| NM_144629 | C2ORF11   | 0.07 | NM_182505 | C9ORF85       | 0.07 |
| NM_144717 | MGC34923  | 0.07 | NM_207326 | LOC149134     | 0.07 |
| NM_138482 | LOC151534 | 0.07 | NM_145284 | LOC159090     | 0.07 |
| NM_153364 | MGC39520  | 0.07 | XM_378866 | LOC199899     | 0.07 |
| XM_166227 | MPEG1     | 0.07 | NM_194299 | LOC221711     | 0.07 |
| NM_203422 | LOC221091 | 0.07 | NM_174936 | PCSK9         | 0.07 |
| XM_375516 | LOC284121 | 0.07 | XM_290817 | FLJ34907      | 0.07 |
| NM_182565 | MGC29814  | 0.07 | XM_378642 | LOC284009     | 0.07 |
| NM_173674 | DCBLD1    | 0.07 | NM_181607 | KRTAP19-1     | 0.07 |
| XM_379582 | LOC286177 | 0.07 | NM_182761 | LOC340069     | 0.07 |
| NM_198998 | AQP12     | 0.07 | NM_207383 | FLJ42289      | 0.07 |
| NM_203390 | LOC389677 | 0.07 | NM_207645 | LOC399947     | 0.07 |
| XM_117236 | LOC200475 | 0.07 | XM_058967 | LOC126037     | 0.07 |
| XM_173119 | LOC255130 | 0.07 | XM_097351 | LOC147975     | 0.07 |
| XM_067605 | LOC131909 | 0.07 | XM_092553 | LOC151320     | 0.07 |
| XM_171766 | LOC255519 | 0.07 | XM_208930 | LOC283953     | 0.07 |
| XM_293918 | LOC345643 | 0.07 | XM_210515 | LOC286561     | 0.07 |

|              |               |      |           |               |      |
|--------------|---------------|------|-----------|---------------|------|
| XM_371340    | LOC388734     | 0.07 | XM_373871 | LOC388709     | 0.07 |
| XM_378002    | LOC402322     | 0.07 | XM_373513 | LOC387810     | 0.07 |
| XM_378686    | LOC400606     | 0.07 | XM_378688 | LOC400607     | 0.07 |
| XM_294765    | LOC388154     | 0.07 | XM_378755 | LOC400657     | 0.07 |
| NM_001005518 | OR6C65        | 0.07 | NM_004119 | FLT3          | 0.08 |
| NM_002037    | FYN           | 0.08 | NM_014030 | GIT1          | 0.08 |
| NM_001883    | CRHR2         | 0.08 | NM_004485 | GNG4          | 0.08 |
| NM_170776    | GPR97         | 0.08 | NM_000956 | PTGER2        | 0.08 |
| NM_000327    | ROM1          | 0.08 | NM_173857 | VN1R4         | 0.08 |
| NM_033056    | PCDH15        | 0.08 | NM_018905 | PCDHA2        | 0.08 |
| NM_002147    | HOXB5         | 0.08 | NM_016044 | CGI-105       | 0.08 |
| NM_001080    | ALDH5A1       | 0.08 | NM_001461 | FMO5          | 0.08 |
| NM_003310    | TSSC1         | 0.08 | NM_018943 | TUBA8         | 0.08 |
| NM_013342    | TFPT          | 0.08 | NM_004618 | TOP3A         | 0.08 |
| NM_016261    | TUBD1         | 0.08 | NM_005125 | CCS           | 0.08 |
| NM_003144    | SSR1          | 0.08 | NM_016156 | MTMR2         | 0.08 |
| NM_144701    | IL23R         | 0.08 | NM_006725 | CD6           | 0.08 |
| NM_002205    | ITGA5         | 0.08 | NM_003212 | TDGF1         | 0.08 |
| NM_004469    | FIGF          | 0.08 | NM_006322 | TUBGCP3       | 0.08 |
| XM_044622    | COL14A1       | 0.08 | NM_001916 | CYC1          | 0.08 |
| NM_021105    | PLSCR1        | 0.08 | NM_000489 | ATRX          | 0.08 |
| NM_015544    | DKFZP564K1964 | 0.08 | NM_032636 | DDA3          | 0.08 |
| NM_017418    | 37226         | 0.08 | NM_020482 | FHL5          | 0.08 |
| NM_005331    | HBQ1          | 0.08 | NM_005557 | KRT16         | 0.08 |
| NM_015368    | PANX1         | 0.08 | NM_001612 | ACRV1         | 0.08 |
| NM_005520    | HNRPH1        | 0.08 | NM_002783 | PSG7          | 0.08 |
| NM_138326    | ACMSD         | 0.08 | NM_002937 | RNASE4        | 0.08 |
| NM_021104    | RPL41         | 0.08 | NM_004638 | BAT2          | 0.08 |
| NM_020981    | B3GALT1       | 0.08 | NM_003785 | GAGEB1        | 0.08 |
| NM_014716    | CENTB1        | 0.08 | NM_014258 | SYCP2         | 0.08 |
| NM_014741    | KIAA0652      | 0.08 | NM_015003 | GOLGIN-67     | 0.08 |
| NM_015219    | EXOC7         | 0.08 | NM_015147 | KIAA0582      | 0.08 |
| NM_014615    | KIAA0182      | 0.08 | NM_015475 | DKFZP564F0522 | 0.08 |
| NM_012446    | SSBP2         | 0.08 | NM_012243 | SLC35A3       | 0.08 |
| NM_015530    | GORASP2       | 0.08 | NM_017614 | BHMT2         | 0.08 |
| NM_015617    | PYGO1         | 0.08 | NM_012345 | NUFIP1        | 0.08 |
| NM_014051    | TMEM14A       | 0.08 | NM_014463 | LSM3          | 0.08 |
| NM_018668    | VPS33B        | 0.08 | NM_015953 | NOSIP         | 0.08 |
| NM_018482    | DDEF1         | 0.08 | NM_013439 | PILRA         | 0.08 |
| NM_015918    | POP5          | 0.08 | NM_024047 | NUDT9         | 0.08 |
| NM_018066    | FLJ10349      | 0.08 | NM_017693 | BIVM          | 0.08 |
| NM_018460    | ARHGAP15      | 0.08 | XM_042301 | KIAA1546      | 0.08 |
| XM_031342    | ZSWIM4        | 0.08 | NM_024019 | NEUROG2       | 0.08 |
| NM_022824    | FBXL17        | 0.08 | NM_024071 | ZFYVE21       | 0.08 |
| NM_024754    | PTCD2         | 0.08 | NM_025159 | CXORF21       | 0.08 |
| NM_031925    | TMPIT         | 0.08 | NM_031475 | ESPN          | 0.08 |

|              |           |      |              |           |      |
|--------------|-----------|------|--------------|-----------|------|
| NM_032935    | MT4       | 0.08 | NM_032711    | MGC13090  | 0.08 |
| NM_032717    | MGC11324  | 0.08 | NM_080475    | SERPINB11 | 0.08 |
| NM_033195    | LDHL      | 0.08 | XM_375665    | LOC116412 | 0.08 |
| XM_290850    | GRIN3B    | 0.08 | NM_053048    | MGC16384  | 0.08 |
| NM_182496    | FLJ40089  | 0.08 | NM_152345    | FLJ25555  | 0.08 |
| NM_173479    | LOC126248 | 0.08 | NM_139281    | WDR36     | 0.08 |
| NM_144648    | FLJ32786  | 0.08 | NM_133455    | EMID1     | 0.08 |
| NM_144669    | FLJ31978  | 0.08 | XM_085836    | KIAA1956  | 0.08 |
| NM_153635    | LOC151835 | 0.08 | NM_145278    | LOC148823 | 0.08 |
| NM_182516    | FLJ32011  | 0.08 | NM_173526    | C14ORF54  | 0.08 |
| XM_372198    | MGC17403  | 0.08 | XM_090885    | C14ORF42  | 0.08 |
| NM_178505    | TMEM26    | 0.08 | NM_152735    | ZBTB9     | 0.08 |
| NM_178518    | FLJ36878  | 0.08 | NM_178548    | AP2E      | 0.08 |
| NM_003514    | HIST1H2AM | 0.08 | XM_065026    | LOC126298 | 0.08 |
| XM_292046    | LOC341412 | 0.08 | XM_376062    | LOC400961 | 0.08 |
| XM_372923    | LOC391360 | 0.08 | XM_375714    | LOC400749 | 0.08 |
| XM_372985    | LOC391510 | 0.08 | XM_379501    | LOC401367 | 0.08 |
| XM_373180    | LOC392084 | 0.08 | XM_380040    | LOC402693 | 0.08 |
| XM_378460    | LOC400216 | 0.08 | XM_372496    | LOC390423 | 0.08 |
| XM_374890    | LOC399900 | 0.08 | XM_372544    | LOC390533 | 0.08 |
| NM_001004341 | FLJ16478  | 0.08 | NM_001005245 | OR5M11    | 0.08 |
| NM_001005334 | OR3A4     | 0.08 | NM_016282    | AK3L1     | 0.09 |
| NM_004418    | DUSP2     | 0.09 | NM_016281    | JIK       | 0.09 |
| NM_003266    | TLR4      | 0.09 | NM_004101    | F2RL2     | 0.09 |
| NM_014683    | ULK2      | 0.09 | NM_005291    | GPR17     | 0.09 |
| NM_005899    | M17S2     | 0.09 | NM_006696    | BRD8      | 0.09 |
| NM_001519    | BRF1      | 0.09 | NM_012186    | FOXE3     | 0.09 |
| NM_003721    | RFXANK    | 0.09 | NM_014112    | TRPS1     | 0.09 |
| NM_003659    | AGPS      | 0.09 | NM_006368    | CREB3     | 0.09 |
| NM_002570    | PCSK6     | 0.09 | NM_021957    | GYS2      | 0.09 |
| NM_003558    | PIP5K1B   | 0.09 | NM_005079    | TPD52     | 0.09 |
| NM_005412    | SHMT2     | 0.09 | NM_007019    | UBE2C     | 0.09 |
| NM_002930    | RIT2      | 0.09 | NM_012300    | FBXW11    | 0.09 |
| NM_007205    | TREX2     | 0.09 | NM_013239    | PR48      | 0.09 |
| NM_002472    | MYH8      | 0.09 | NM_032559    | LOC84643  | 0.09 |
| NM_001558    | IL10RA    | 0.09 | NM_003327    | TNFRSF4   | 0.09 |
| NM_002546    | TNFRSF11B | 0.09 | NM_002414    | CD99      | 0.09 |
| NM_004345    | CAMP      | 0.09 | NM_007018    | CEP1      | 0.09 |
| NM_018202    | FLJ10747  | 0.09 | NM_013332    | HIG2      | 0.09 |
| NM_002284    | KRTHB6    | 0.09 | NM_016166    | PIAS1     | 0.09 |
| NM_001870    | CPA3      | 0.09 | NM_001900    | CST5      | 0.09 |
| NM_001512    | GSTA4     | 0.09 | NM_004135    | IDH3G     | 0.09 |
| NM_000555    | DCX       | 0.09 | NM_002774    | KLK6      | 0.09 |
| NM_004285    | H6PD      | 0.09 | NM_004838    | HOMER3    | 0.09 |
| XM_375712    | SDC3      | 0.09 | NM_005725    | TSPAN-2   | 0.09 |
| NM_007021    | C10ORF10  | 0.09 | NM_015359    | SLC39A14  | 0.09 |

|           |           |      |              |           |      |
|-----------|-----------|------|--------------|-----------|------|
| NM_018413 | CHST11    | 0.09 | NM_013349    | SPUF      | 0.09 |
| NM_016552 | ANKMY1    | 0.09 | NM_016233    | PADI3     | 0.09 |
| NM_019083 | FLJ10287  | 0.09 | NM_017867    | FLJ20534  | 0.09 |
| NM_018266 | FLJ10902  | 0.09 | NM_018555    | ZNF331    | 0.09 |
| NM_017926 | C14ORF118 | 0.09 | NM_018447    | LOC55831  | 0.09 |
| NM_020685 | HT021     | 0.09 | NM_023016    | C2ORF26   | 0.09 |
| NM_032156 | C1QDC1    | 0.09 | NM_030765    | B3GNT4    | 0.09 |
| NM_024644 | C14ORF169 | 0.09 | NM_024974    | FLJ11800  | 0.09 |
| NM_030776 | ZBP1      | 0.09 | NM_031216    | SEC13L    | 0.09 |
| NM_032293 | GARNL3    | 0.09 | NM_032779    | FLJ14397  | 0.09 |
| NM_033058 | TRIM55    | 0.09 | NM_032445    | MEGF11    | 0.09 |
| NM_032815 | FLJ14639  | 0.09 | NM_032505    | TA-KRP    | 0.09 |
| XM_379528 | LOC90520  | 0.09 | NM_138425    | GRCC10    | 0.09 |
| NM_033276 | KUB3      | 0.09 | NM_014021    | SSX2IP    | 0.09 |
| NM_153340 | MGC46534  | 0.09 | XM_059368    | LOC129607 | 0.09 |
| NM_144651 | FLJ25471  | 0.09 | NM_080725    | C20ORF139 | 0.09 |
| NM_080829 | C20ORF175 | 0.09 | NM_153810    | C10ORF46  | 0.09 |
| NM_080390 | MY048     | 0.09 | NM_080618    | CTCFL     | 0.09 |
| NM_148961 | OTOS      | 0.09 | NM_152571    | FLJ36779  | 0.09 |
| NM_152638 | MGC26598  | 0.09 | NM_183373    | C6ORF145  | 0.09 |
| XM_376463 | MGC39372  | 0.09 | NM_152693    | MGC34827  | 0.09 |
| NM_152673 | MUC20     | 0.09 | NM_145313    | RASGEF1A  | 0.09 |
| XM_378303 | LOC283214 | 0.09 | NM_198481    | UNQ3033   | 0.09 |
| NM_183062 | MPN2      | 0.09 | NM_181846    | HKR2      | 0.09 |
| NM_198571 | FLJ39237  | 0.09 | NM_198545    | LOC374946 | 0.09 |
| XM_293123 | LOC343578 | 0.09 | XM_295200    | LOC340286 | 0.09 |
| XM_098625 | LOC154872 | 0.09 | XM_378947    | LOC400813 | 0.09 |
| XM_372928 | LOC391373 | 0.09 | XM_371846    | LOC389428 | 0.09 |
| XM_377896 | LOC402214 | 0.09 | XM_373219    | LOC392152 | 0.09 |
| XM_374277 | LOC389683 | 0.09 | XM_376838    | LOC401507 | 0.09 |
| XM_372532 | LOC390502 | 0.09 | XM_378708    | LOC400623 | 0.09 |
| XM_370997 | LOC388308 | 0.09 | NM_001001524 | TM6SF2    | 0.09 |
| XM_377062 | LOC401620 | 0.09 | NM_001005274 | OR4A16    | 0.09 |
| NM_018167 | BTBD7     | 0.09 | NM_001005503 | OR11G2    | 0.09 |
| NM_004329 | BMPR1A    | 0.1  | NM_004836    | EIF2AK3   | 0.1  |
| NM_002751 | MAPK11    | 0.1  | NM_002401    | MAP3K3    | 0.1  |
| NM_017412 | FZD3      | 0.1  | NM_007227    | GPR45     | 0.1  |
| NM_004061 | CDH12     | 0.1  | NM_003472    | DEK       | 0.1  |
| NM_001421 | ELF4      | 0.1  | NM_002699    | POU3F1    | 0.1  |
| NM_005023 | PGGT1B    | 0.1  | NM_004470    | FKBP2     | 0.1  |
| NM_001977 | ENPEP     | 0.1  | NM_004194    | ADAM22    | 0.1  |
| NM_003072 | SMARCA4   | 0.1  | NM_022571    | GPR135    | 0.1  |
| NM_016362 | GHRL      | 0.1  | NM_003395    | WNT9A     | 0.1  |
| NM_002506 | NGFB      | 0.1  | NM_004451    | ESRRA     | 0.1  |
| NM_004732 | KCNAB3    | 0.1  | NM_000254    | MTR       | 0.1  |
| NM_006860 | RABL4     | 0.1  | NM_005506    | SCARB2    | 0.1  |

|           |               |      |              |           |      |
|-----------|---------------|------|--------------|-----------|------|
| NM_001839 | CNN3          | 0.1  | NM_004129    | GUCY1B2   | 0.1  |
| NM_005003 | NDUFAB1       | 0.1  | NM_018674    | ACCN4     | 0.1  |
| NM_006279 | SIAT6         | 0.1  | NM_002818    | PSME2     | 0.1  |
| NM_004187 | JARID1C       | 0.1  | NM_006961    | ZNF19     | 0.1  |
| NM_003825 | SNAP23        | 0.1  | XM_044155    | KIAA0446  | 0.1  |
| NM_005469 | PTE1          | 0.1  | NM_005687    | FARSLB    | 0.1  |
| NM_006043 | HS3ST2        | 0.1  | NM_006848    | DIPA      | 0.1  |
| XM_377338 | KIAA0323      | 0.1  | NM_015335    | THRAP2    | 0.1  |
| XM_171054 | KIAA0527      | 0.1  | NM_015650    | TRAF3IP1  | 0.1  |
| NM_014155 | HSPC063       | 0.1  | NM_016076    | PNAS-4    | 0.1  |
| NM_017628 | FLJ20032      | 0.1  | NM_017923    | FLJ20668  | 0.1  |
| NM_017931 | FLJ20699      | 0.1  | NM_017967    | FLJ20850  | 0.1  |
| NM_018389 | SLC35C1       | 0.1  | NM_018398    | CACNA2D3  | 0.1  |
| NM_183425 | RNPC1         | 0.1  | NM_020207    | C9ORF102  | 0.1  |
| NM_019108 | FLJ12886      | 0.1  | NM_020320    | RARSL     | 0.1  |
| NM_023945 | MS4A5         | 0.1  | NM_024303    | ZNF495    | 0.1  |
| NM_030650 | KIAA1715      | 0.1  | NM_031310    | PLVAP     | 0.1  |
| NM_032236 | USP48         | 0.1  | NM_032447    | FBN3      | 0.1  |
| NM_032495 | HOP           | 0.1  | NM_032520    | GNPTAG    | 0.1  |
| NM_052870 | SNAG1         | 0.1  | XM_028067    | MIDN      | 0.1  |
| NM_198075 | DKFZP761L1518 | 0.1  | NM_001001410 | MGC24381  | 0.1  |
| XM_371577 | MGC23908      | 0.1  | NM_138698    | LOC91431  | 0.1  |
| NM_145038 | MGC16372      | 0.1  | NM_152349    | MGC45562  | 0.1  |
| NM_207325 | LOC147991     | 0.1  | NM_173797    | PAPD4     | 0.1  |
| XM_091914 | LOC162993     | 0.1  | NM_144970    | MGC39350  | 0.1  |
| NM_198460 | DKFZP686G0786 | 0.1  | XM_378346    | LOC196415 | 0.1  |
| NM_144990 | FLJ23878      | 0.1  | NM_173549    | FLJ39553  | 0.1  |
| XM_375833 | LOC284581     | 0.1  | XM_290712    | MGC46336  | 0.1  |
| NM_178351 | LCE1C         | 0.1  | XM_211092    | LOC283583 | 0.1  |
| XM_291569 | LOC343413     | 0.1  | XM_292779    | LOC342918 | 0.1  |
| XM_293903 | LOC345630     | 0.1  | XM_372825    | LOC391194 | 0.1  |
| XM_372970 | LOC391481     | 0.1  | XM_379513    | LOC401396 | 0.1  |
| XM_374406 | LOC392636     | 0.1  | XM_378529    | LOC400400 | 0.1  |
| XM_372630 | LOC390712     | 0.1  | XM_373358    | LOC392509 | 0.1  |
| NM_014365 | HSPB8         | 0.11 | NM_002737    | PRKCA     | 0.11 |
| NM_005160 | ADRBK2        | 0.11 | NM_016540    | GPR83     | 0.11 |
| NM_177437 | TAS2R60       | 0.11 | NM_001796    | CDH8      | 0.11 |
| NM_022162 | CARD15        | 0.11 | NM_004225    | MFHAS1    | 0.11 |
| NM_018911 | PCDHA8        | 0.11 | NM_006563    | KLF1      | 0.11 |
| NM_001518 | GTF2I         | 0.11 | NM_003202    | TCF7      | 0.11 |
| NM_001360 | DHCR7         | 0.11 | NM_002028    | FNTB      | 0.11 |
| NM_002035 | FVT1          | 0.11 | NM_000151    | G6PC      | 0.11 |
| NM_003335 | UBE1L         | 0.11 | NM_018037    | RALGPS2   | 0.11 |
| NM_000730 | CCKAR         | 0.11 | NM_000758    | CSF2      | 0.11 |
| NM_002296 | LBR           | 0.11 | NM_002345    | LUM       | 0.11 |
| NM_021076 | NEFH          | 0.11 | NM_001681    | ATP2A2    | 0.11 |

|              |               |      |              |           |      |
|--------------|---------------|------|--------------|-----------|------|
| NM_000087    | CNGA1         | 0.11 | NM_058171    | ING2      | 0.11 |
| NM_015384    | IDN3          | 0.11 | NM_004599    | SREBF2    | 0.11 |
| NM_001183    | ATP6AP1       | 0.11 | NM_005309    | GPT       | 0.11 |
| NM_000775    | CYP2J2        | 0.11 | NM_005323    | HIST1H1T  | 0.11 |
| NM_002034    | FUT5          | 0.11 | NM_001490    | GCNT1     | 0.11 |
| NM_002260    | KLRC2         | 0.11 | NM_019597    | HNRPH2    | 0.11 |
| NM_002784    | PSG9          | 0.11 | NM_003133    | SRP9      | 0.11 |
| XM_376023    | ZBED4         | 0.11 | NM_006323    | SEC24B    | 0.11 |
| NM_006359    | SLC9A6        | 0.11 | NM_006857    | RY1       | 0.11 |
| NM_015100    | POGZ          | 0.11 | NM_014925    | KIAA1002  | 0.11 |
| NM_015393    | DKFZP564O0823 | 0.11 | XM_166450    | BRPF3     | 0.11 |
| NM_012436    | SPAG8         | 0.11 | NM_199072    | HIC       | 0.11 |
| NM_019070    | DDX49         | 0.11 | NM_017704    | FGIF      | 0.11 |
| XM_371354    | FLJ10157      | 0.11 | NM_018328    | MBD5      | 0.11 |
| NM_018719    | RAM2          | 0.11 | NM_020531    | C20ORF3   | 0.11 |
| XM_087593    | KIAA1430      | 0.11 | XM_371664    | KIAA1257  | 0.11 |
| NM_023015    | FLJ21919      | 0.11 | NM_024512    | LRRC2     | 0.11 |
| NM_024534    | FLJ12684      | 0.11 | NM_024583    | SCRN3     | 0.11 |
| NM_024061    | VIK           | 0.11 | NM_030636    | KIAA1706  | 0.11 |
| NM_032590    | FBXL10        | 0.11 | NM_032334    | MGC14595  | 0.11 |
| NM_032867    | FLJ14966      | 0.11 | NM_139279    | MCFD2     | 0.11 |
| NM_033257    | DGCR6L        | 0.11 | NM_052888    | LOC114659 | 0.11 |
| NM_033418    | MGC9084       | 0.11 | NM_144772    | APOA1BP   | 0.11 |
| NM_152433    | KBTBD3        | 0.11 | NM_152507    | C21ORF128 | 0.11 |
| NM_172002    | HSC20         | 0.11 | XM_086409    | KIAA2025  | 0.11 |
| NM_182518    | LOC149469     | 0.11 | NM_152597    | FSIP1     | 0.11 |
| NM_152602    | ZNF433        | 0.11 | NM_152782    | MGC33329  | 0.11 |
| XM_379334    | LOC257396     | 0.11 | NM_207341    | MGC87693  | 0.11 |
| XM_378430    | LOC283480     | 0.11 | NM_181608    | KRTAP19-2 | 0.11 |
| NM_173832    | FLJ38705      | 0.11 | NM_198694    | KRTAP18-5 | 0.11 |
| NM_178561    | MGC41943      | 0.11 | NM_207460    | FLJ44313  | 0.11 |
| XM_292562    | LOC342460     | 0.11 | XM_098350    | LOC153297 | 0.11 |
| XM_211749    | LOC285047     | 0.11 | XM_117213    | LOC200292 | 0.11 |
| XM_068430    | LOC133609     | 0.11 | XM_372991    | LOC391540 | 0.11 |
| XM_379908    | LOC402579     | 0.11 | XM_374123    | LOC389295 | 0.11 |
| XM_374289    | LOC389702     | 0.11 | XM_373645    | LOC388169 | 0.11 |
| XM_373793    | LOC388504     | 0.11 | NM_001005234 | OR1L3     | 0.11 |
| NM_001004063 | OR4K1         | 0.11 | NM_003607    | CDC42BPA  | 0.12 |
| NM_000298    | PKLR          | 0.12 | NM_005546    | ITK       | 0.12 |
| NM_018979    | PRKWNK1       | 0.12 | NM_002760    | PRKY      | 0.12 |
| NM_000291    | PGK1          | 0.12 | NM_014879    | GPR105    | 0.12 |
| NM_001901    | CTGF          | 0.12 | NM_005620    | S100A11   | 0.12 |
| NM_001538    | HSF4          | 0.12 | NM_002501    | NFIX      | 0.12 |
| NM_003181    | T             | 0.12 | NM_000918    | P4HB      | 0.12 |
| NM_006830    | UQCR          | 0.12 | NM_003645    | SLC27A2   | 0.12 |
| NM_004607    | TBCA          | 0.12 | NM_001979    | EPHX2     | 0.12 |



|              |           |      |              |               |      |
|--------------|-----------|------|--------------|---------------|------|
| NM_020040    | TUBB4Q    | 0.12 | NM_003300    | TRAF3         | 0.12 |
| NM_000867    | HTR2B     | 0.12 | NM_001561    | TNFRSF9       | 0.12 |
| NM_014257    | CD209L    | 0.12 | NM_006139    | CD28          | 0.12 |
| NM_004421    | DVL1      | 0.12 | NM_002995    | XCL1          | 0.12 |
| NM_000811    | GABRA6    | 0.12 | NM_000299    | PKP1          | 0.12 |
| AL022318     | APOBEC3D  | 0.12 | NM_000253    | MTP           | 0.12 |
| NM_006729    | DIAPH2    | 0.12 | NM_145246    | C10ORF4       | 0.12 |
| NM_003494    | DYSF      | 0.12 | XM_370693    | POU6F1        | 0.12 |
| NM_014276    | RBPSUHL   | 0.12 | NM_005840    | SPRY3         | 0.12 |
| NM_025220    | ADAM33    | 0.12 | NM_016615    | SLC6A13       | 0.12 |
| NM_001006607 | LOC474170 | 0.12 | NM_024498    | ZNF117        | 0.12 |
| NM_004782    | SNAP29    | 0.12 | NM_005447    | PAMCI         | 0.12 |
| NM_014682    | ST18      | 0.12 | NM_006360    | GA17          | 0.12 |
| NM_006833    | COPS6     | 0.12 | XM_088315    | KIAA0870      | 0.12 |
| NM_014372    | RNF11     | 0.12 | NM_013322    | SNX10         | 0.12 |
| NM_016210    | LOC51161  | 0.12 | NM_013241    | FHOD1         | 0.12 |
| NM_018948    | MIG-6     | 0.12 | NM_017754    | C6ORF107      | 0.12 |
| NM_017903    | FLJ20618  | 0.12 | NM_017684    | VPS13C        | 0.12 |
| NM_018172    | FLJ10661  | 0.12 | NM_019613    | LOC56270      | 0.12 |
| NM_022065    | THADA     | 0.12 | NM_025000    | FLJ13096      | 0.12 |
| NM_024874    | PKD1-LIKE | 0.12 | NM_024887    | DHDDS         | 0.12 |
| NM_031445    | MGC4268   | 0.12 | NM_032855    | HSH2D         | 0.12 |
| XM_376018    | KIAA1644  | 0.12 | NM_173464    | L3MBTL4       | 0.12 |
| NM_138800    | TRIM43    | 0.12 | NM_080752    | ZSWIM3        | 0.12 |
| NM_173515    | MAGI1     | 0.12 | NM_173521    | C9ORF84       | 0.12 |
| NM_138295    | PKD1L1    | 0.12 | NM_173547    | LOC201292     | 0.12 |
| NM_173571    | LOC255313 | 0.12 | XM_048898    | HSPA12A       | 0.12 |
| NM_178550    | MGC48998  | 0.12 | XM_292193    | DKFZP686J0811 | 0.12 |
| XM_294675    | LOC338667 | 0.12 | NM_182658    | C20ORF185     | 0.12 |
| NM_198539    | ZNF568    | 0.12 | NM_207458    | FLJ46026      | 0.12 |
| XM_060945    | LOC128360 | 0.12 | XM_088679    | LOC158812     | 0.12 |
| XM_061890    | LOC120146 | 0.12 | XM_089866    | LOC143506     | 0.12 |
| XM_372913    | LOC391347 | 0.12 | XM_374163    | LOC389372     | 0.12 |
| XM_374399    | LOC392630 | 0.12 | XM_373263    | LOC392262     | 0.12 |
| XM_378247    | LOC399806 | 0.12 | XM_372329    | LOC390007     | 0.12 |
| XM_373635    | LOC388139 | 0.12 | NM_001003693 | C6ORF21       | 0.12 |
| NM_001005482 | OR5H2     | 0.12 | NM_004717    | DGKI          | 0.13 |
| NM_013330    | NME7      | 0.13 | NM_020126    | SPHK2         | 0.13 |
| NM_014476    | PDLIM3    | 0.13 | NM_004933    | CDH15         | 0.13 |
| NM_012147    | DUX2      | 0.13 | NM_004433    | ELF3          | 0.13 |
| NM_006454    | MXD4      | 0.13 | NM_005515    | HLXB9         | 0.13 |
| NM_000391    | CLN2      | 0.13 | NM_006412    | AGPAT2        | 0.13 |
| NM_003814    | ADAM20    | 0.13 | NM_002884    | RAP1A         | 0.13 |
| NM_001990    | EYA3      | 0.13 | NM_016252    | BIRC6         | 0.13 |
| NM_001481    | GAS8      | 0.13 | NM_000962    | PTGS1         | 0.13 |
| NM_014479    | ADAMDEC1  | 0.13 | NM_004521    | KIF5B         | 0.13 |

|           |              |      |              |           |      |
|-----------|--------------|------|--------------|-----------|------|
| NM_003856 | IL1RL1       | 0.13 | NM_002183    | IL3RA     | 0.13 |
| NM_000809 | GABRA4       | 0.13 | NM_004557    | NOTCH4    | 0.13 |
| NM_133329 | KCNG3        | 0.13 | NM_003474    | ADAM12    | 0.13 |
| NM_017817 | RAB20        | 0.13 | NM_015417    | C20ORF28  | 0.13 |
| NM_003642 | HAT1         | 0.13 | NM_032832    | LRP11     | 0.13 |
| NM_015318 | ARHGEF18     | 0.13 | NM_003110    | SP2       | 0.13 |
| NM_006089 | SCML2        | 0.13 | NM_005277    | GPM6A     | 0.13 |
| NM_002107 | H3F3A        | 0.13 | NM_005512    | GARP      | 0.13 |
| NM_018446 | AD-017       | 0.13 | NM_002813    | PSMD9     | 0.13 |
| NM_000582 | SPP1         | 0.13 | NM_003316    | TTC3      | 0.13 |
| NM_021968 | HIST1H4J     | 0.13 | NM_019591    | ZNF26     | 0.13 |
| NM_015836 | WARS2        | 0.13 | XM_377355    | KIAA0602  | 0.13 |
| XM_031689 | MGA          | 0.13 | NM_015144    | BDG29     | 0.13 |
| NM_012268 | PLD3         | 0.13 | NM_014579    | SLC39A2   | 0.13 |
| NM_013443 | SIAT7F       | 0.13 | NM_016378    | VCX2      | 0.13 |
| NM_153203 | C21ORF74     | 0.13 | NM_017763    | FLJ20315  | 0.13 |
| NM_017917 | C14ORF10     | 0.13 | NM_018559    | KIAA1704  | 0.13 |
| NM_018400 | SCN3B        | 0.13 | NM_031276    | TEX11     | 0.13 |
| NM_020873 | LRRN1        | 0.13 | NM_021824    | NIF3L1    | 0.13 |
| NM_020760 | HECW2        | 0.13 | NM_020764    | CASKIN1   | 0.13 |
| NM_133489 | SLC26A10     | 0.13 | NM_024726    | FLJ22527  | 0.13 |
| NM_030637 | DDHD1        | 0.13 | NM_030809    | C12ORF22  | 0.13 |
| NM_032018 | DKFZP547N043 | 0.13 | NM_032689    | ZNF607    | 0.13 |
| NM_032508 | FAM11A       | 0.13 | NM_032898    | MGC14126  | 0.13 |
| NM_174887 | LOC90410     | 0.13 | NM_138434    | C7ORF29   | 0.13 |
| XM_043989 | LOC92270     | 0.13 | NM_145247    | C10ORF78  | 0.13 |
| XM_087804 | SYTL3        | 0.13 | NM_194283    | LOC134218 | 0.13 |
| NM_152436 | MGC39497     | 0.13 | XM_059384    | LOC129881 | 0.13 |
| NM_152516 | COMMD1       | 0.13 | XM_378876    | LOC149351 | 0.13 |
| NM_172037 | RDH10        | 0.13 | XM_376433    | SPINK5L3  | 0.13 |
| NM_153038 | FLJ32447     | 0.13 | NM_152684    | FLJ39653  | 0.13 |
| NM_145032 | FBXL13       | 0.13 | NM_174920    | LOC201191 | 0.13 |
| NM_152765 | MGC33510     | 0.13 | XM_208887    | LOC283871 | 0.13 |
| XM_378661 | LOC339263    | 0.13 | XM_293029    | CDKL4     | 0.13 |
| NM_138372 | LOC91661     | 0.13 | XM_375803    | LOC400785 | 0.13 |
| XM_371315 | LOC388701    | 0.13 | XM_373316    | LOC392391 | 0.13 |
| XM_378300 | LOC399920    | 0.13 | XM_378506    | LOC400350 | 0.13 |
| XM_373695 | LOC388300    | 0.13 | NM_001005275 | OR4A15    | 0.13 |
| NM_001715 | BLK          | 0.14 | NM_174944    | C14ORF20  | 0.14 |
| NM_021158 | TRIB3        | 0.14 | NM_002821    | PTK7      | 0.14 |
| NM_000739 | CHRM2        | 0.14 | NM_005767    | P2RY5     | 0.14 |
| NM_018243 | 40787        | 0.14 | NM_176887    | TAS2R46   | 0.14 |
| NM_001942 | DSG1         | 0.14 | NM_001639    | APCS      | 0.14 |
| NM_005346 | HSPA1B       | 0.14 | NM_000596    | IGFBP1    | 0.14 |
| NM_000354 | SERPINA7     | 0.14 | NM_004083    | DDIT3     | 0.14 |
| NM_015995 | KLF13        | 0.14 | NM_005341    | HKR3      | 0.14 |

|           |              |      |           |               |      |
|-----------|--------------|------|-----------|---------------|------|
| NM_003106 | SOX2         | 0.14 | NM_006144 | GZMA          | 0.14 |
| NM_003345 | UBE2I        | 0.14 | NM_003385 | VSNL1         | 0.14 |
| NM_012400 | PLA2G2D      | 0.14 | NM_018444 | PPM2C         | 0.14 |
| XM_051093 | PPM1H        | 0.14 | NM_002988 | CCL18         | 0.14 |
| NM_000732 | CD3D         | 0.14 | NM_000760 | CSF3R         | 0.14 |
| NM_000899 | KITLG        | 0.14 | NM_006573 | TNFSF13B      | 0.14 |
| NM_133263 | PPARGC1B     | 0.14 | NM_000041 | APOE          | 0.14 |
| NM_001045 | SLC6A4       | 0.14 | NM_001780 | CD63          | 0.14 |
| NM_016343 | CENPF        | 0.14 | NM_000069 | CACNA1S       | 0.14 |
| NM_022836 | DCLRE1B      | 0.14 | NM_020958 | KIAA1622      | 0.14 |
| NM_004565 | PEX14        | 0.14 | NM_025151 | RCP           | 0.14 |
| NR_001446 | ANXA2P3      | 0.14 | NM_004056 | CA8           | 0.14 |
| NM_002104 | GZMK         | 0.14 | NM_004482 | GALNT3        | 0.14 |
| NM_001362 | DIO3         | 0.14 | NM_005389 | PCMT1         | 0.14 |
| NM_052957 | ACRC         | 0.14 | NM_007149 | ZNF184        | 0.14 |
| NM_003518 | HIST1H2BG    | 0.14 | NM_007126 | VCP           | 0.14 |
| NM_003915 | CPNE1        | 0.14 | NM_003714 | STC2          | 0.14 |
| NM_020982 | CLDN9        | 0.14 | NM_005796 | NUTF2         | 0.14 |
| NM_006816 | LMAN2        | 0.14 | NM_007286 | SYNPO         | 0.14 |
| NM_015110 | SMC5L1       | 0.14 | NM_014607 | UBXD2         | 0.14 |
| NM_014346 | C22ORF4      | 0.14 | NM_015342 | KIAA0073      | 0.14 |
| NM_030621 | DICER1       | 0.14 | XM_378078 | C9ORF4        | 0.14 |
| NM_015963 | THAP4        | 0.14 | NM_013399 | C16ORF5       | 0.14 |
| NM_015900 | PLA1A        | 0.14 | NM_018982 | DJ167A19.1    | 0.14 |
| NM_016584 | IL23A        | 0.14 | NM_017577 | DKFZP434C0328 | 0.14 |
| NM_017939 | FLJ20718     | 0.14 | NM_017678 | C11ORF33      | 0.14 |
| NM_017571 | LOC55580     | 0.14 | NM_020643 | C11ORF16      | 0.14 |
| XM_048721 | DKFZP762K222 | 0.14 | NM_020234 | MDS009        | 0.14 |
| NM_020119 | ZC3HAV1      | 0.14 | XM_029353 | KIAA1509      | 0.14 |
| NM_021203 | SRPRB        | 0.14 | NM_022077 | MANBAL        | 0.14 |
| NM_024918 | C20ORF172    | 0.14 | NM_030973 | ARC92         | 0.14 |
| NM_032259 | DKFZP434F054 | 0.14 | NM_032285 | MGC3207       | 0.14 |
| NM_032591 | SLC9A7       | 0.14 | NM_032598 | NYD-SP20      | 0.14 |
| XM_059730 | C6ORF159     | 0.14 | XM_376444 | LOC133491     | 0.14 |
| XM_380162 | LOC154822    | 0.14 | NM_152911 | PAOX          | 0.14 |
| NM_181623 | KRTAP15-1    | 0.14 | XM_378356 | LOC283400     | 0.14 |
| NM_174942 | LOC283431    | 0.14 | XM_378969 | LOC284788     | 0.14 |
| NM_178516 | LOC283849    | 0.14 | NM_173648 | FLJ39502      | 0.14 |
| XM_379111 | LOC285033    | 0.14 | NM_175065 | HIST2H2AB     | 0.14 |
| NM_182597 | FLJ39575     | 0.14 | NM_005110 | GFPT2         | 0.14 |
| XM_064062 | GPR139       | 0.14 | XM_060535 | LOC127545     | 0.14 |
| XM_211768 | LOC285110    | 0.14 | XM_087225 | LOC151507     | 0.14 |
| XM_379171 | LOC401048    | 0.14 | XM_377741 | LOC402072     | 0.14 |
| XM_380139 | LOC402587    | 0.14 | XM_376876 | LOC401531     | 0.14 |
| XM_379543 | LOC401442    | 0.14 | XM_372094 | LOC389730     | 0.14 |
| XM_372569 | LOC390577    | 0.14 | XM_375163 | LOC400320     | 0.14 |

|              |               |      |           |           |      |
|--------------|---------------|------|-----------|-----------|------|
| NM_001005326 | OR4F6         | 0.14 | NM_000604 | FGFR1     | 0.15 |
| NM_020421    | ADCK1         | 0.15 | NM_006259 | PRKG2     | 0.15 |
| NM_005873    | RGS19         | 0.15 | NM_005010 | NRCAM     | 0.15 |
| NM_005013    | NUCB2         | 0.15 | NM_002580 | PAP       | 0.15 |
| NM_014005    | PCDHA9        | 0.15 | NM_014012 | REM1      | 0.15 |
| NM_176822    | NALP14        | 0.15 | NM_002593 | PCOLCE    | 0.15 |
| NM_001160    | APAF1         | 0.15 | NM_006286 | TFDP2     | 0.15 |
| NM_016371    | HSD17B7       | 0.15 | NM_002429 | MMP19     | 0.15 |
| NM_006690    | MMP24         | 0.15 | NM_138424 | KIF12     | 0.15 |
| NM_006845    | KIF2C         | 0.15 | NM_003999 | OSMR      | 0.15 |
| NM_002191    | INHHA         | 0.15 | NM_001430 | EPAS1     | 0.15 |
| NM_000268    | NF2           | 0.15 | NM_018209 | ARFGAP1   | 0.15 |
| NM_001764    | CD1B          | 0.15 | NM_032830 | CIRH1A    | 0.15 |
| NM_006400    | DCTN2         | 0.15 | NM_002004 | FDPS      | 0.15 |
| NM_001442    | FABP4         | 0.15 | NM_006302 | GCS1      | 0.15 |
| NM_000283    | PDE6B         | 0.15 | NM_014757 | MAML1     | 0.15 |
| NM_005039    | PRB1          | 0.15 | NM_014217 | KCNK2     | 0.15 |
| NM_000919    | PAM           | 0.15 | NM_138726 | ABCC13    | 0.15 |
| NM_005615    | RNASE6        | 0.15 | NM_003276 | TMPO      | 0.15 |
| NM_012074    | DPF3          | 0.15 | NM_012075 | C16ORF35  | 0.15 |
| NM_003462    | DNAL11        | 0.15 | NM_004921 | CLCA3     | 0.15 |
| NM_014659    | KIAA0377      | 0.15 | NM_007342 | NUPL2     | 0.15 |
| XM_375594    | ZNF507        | 0.15 | XM_048070 | ZNF292    | 0.15 |
| NM_015190    | DNAJC9        | 0.15 | NM_015679 | TRUB2     | 0.15 |
| NM_013300    | HSU79274      | 0.15 | NM_016953 | PDE11A    | 0.15 |
| NM_015910    | LOC51057      | 0.15 | NM_018237 | CCAR1     | 0.15 |
| NM_020408    | C6ORF149      | 0.15 | XM_370756 | KIAA1305  | 0.15 |
| NM_178439    | GCL           | 0.15 | NM_022135 | POPDC2    | 0.15 |
| NM_033030    | BOLL          | 0.15 | NM_024086 | MGC3329   | 0.15 |
| NM_024576    | OGFRL1        | 0.15 | NM_024678 | FLJ23441  | 0.15 |
| NM_031435    | DKFZP564I0422 | 0.15 | NM_032300 | MGC10854  | 0.15 |
| XM_114418    | KIAA1729      | 0.15 | NM_080669 | MGC9564   | 0.15 |
| NM_152272    | MGC29816      | 0.15 | NM_152336 | FLJ32310  | 0.15 |
| NM_207314    | UNQ9373       | 0.15 | NM_173503 | FLJ25818  | 0.15 |
| NM_145054    | LOC146845     | 0.15 | NM_182829 | LOC158160 | 0.15 |
| NM_177455    | MIST1         | 0.15 | XM_376349 | LOC201725 | 0.15 |
| NM_152686    | MGC29463      | 0.15 | XM_378368 | LOC283392 | 0.15 |
| NM_173641    | EPHA10        | 0.15 | NM_182561 | FLJ36144  | 0.15 |
| NM_199350    | LOC375759     | 0.15 | NM_207501 | FLJ27255  | 0.15 |
| XM_292035    | LOC341392     | 0.15 | XM_373986 | LOC388952 | 0.15 |
| XM_379210    | LOC401085     | 0.15 | XM_373079 | LOC391769 | 0.15 |
| XM_371901    | LOC389490     | 0.15 | XM_380146 | LOC402596 | 0.15 |
| XM_370607    | LOC387750     | 0.15 | XM_377265 | LOC401720 | 0.15 |
| XM_377388    | LOC401819     | 0.15 | XM_373338 | LOC392425 | 0.15 |
| NM_001002761 | BPY2C         | 0.15 | NM_004383 | CSK       | 0.16 |
| NM_014550    | CARD10        | 0.16 | NM_139209 | GRK7      | 0.16 |

|           |           |      |           |           |      |
|-----------|-----------|------|-----------|-----------|------|
| NM_152230 | IMPK      | 0.16 | NM_024594 | PANK3     | 0.16 |
| NM_014370 | STK23     | 0.16 | NM_005048 | PTHR2     | 0.16 |
| NM_002156 | HSPD1     | 0.16 | NM_002590 | PCDH8     | 0.16 |
| NM_002964 | S100A8    | 0.16 | NM_005249 | FOXG1B    | 0.16 |
| NM_002449 | MSX2      | 0.16 | NM_005384 | NFIL3     | 0.16 |
| NM_006942 | SOX15     | 0.16 | NM_012476 | VAX2      | 0.16 |
| NM_000191 | HMGCL     | 0.16 | NM_002686 | PNMT      | 0.16 |
| NM_003257 | TJP1      | 0.16 | NM_033256 | PPP1R14A  | 0.16 |
| NM_003219 | TERT      | 0.16 | NM_002070 | GNAI2     | 0.16 |
| NM_006447 | USP16     | 0.16 | NM_006245 | PPP2R5D   | 0.16 |
| NM_006613 | GRAP      | 0.16 | NM_005854 | RAMP2     | 0.16 |
| NM_025216 | WNT10A    | 0.16 | NM_000211 | ITGB2     | 0.16 |
| NM_002135 | NR4A1     | 0.16 | NM_020533 | MCOLN1    | 0.16 |
| NM_002644 | PIGR      | 0.16 | Y10615    | ADAM3B    | 0.16 |
| XM_170783 | LOC254571 | 0.16 | NM_000533 | PLP1      | 0.16 |
| NM_000876 | IGF2R     | 0.16 | NM_001163 | APBA1     | 0.16 |
| NM_001925 | DEFA4     | 0.16 | NM_002519 | NPAT      | 0.16 |
| NM_033226 | ABCC12    | 0.16 | XM_064152 | SRL       | 0.16 |
| NM_021109 | TMSB4X    | 0.16 | NM_007167 | ZNF258    | 0.16 |
| NM_006315 | RNF3      | 0.16 | XM_375697 | KIAA0459  | 0.16 |
| XM_370667 | KIAA1110  | 0.16 | NM_014611 | MDN1      | 0.16 |
| NM_032870 | C6ORF111  | 0.16 | NM_012330 | MYST4     | 0.16 |
| NM_014441 | SIGLEC9   | 0.16 | NM_014473 | HSA9761   | 0.16 |
| NM_020994 | CTAG2     | 0.16 | NM_015878 | OAZIN     | 0.16 |
| NM_019075 | UGT1A10   | 0.16 | NM_019886 | CHST7     | 0.16 |
| NM_032546 | TRIM54    | 0.16 | NM_022052 | NXF3      | 0.16 |
| NM_020677 | HSCARG    | 0.16 | NM_022744 | FLJ13868  | 0.16 |
| NM_022820 | CYP3A43   | 0.16 | NM_031481 | SLC25A18  | 0.16 |
| NM_032792 | ZNF499    | 0.16 | NM_052890 | PGLYRP2   | 0.16 |
| NM_145235 | FANK1     | 0.16 | XM_378828 | LOC115110 | 0.16 |
| NM_182501 | MGC61716  | 0.16 | NM_174983 | C19ORF28  | 0.16 |
| NM_152396 | MGC24132  | 0.16 | NM_175877 | MGC35023  | 0.16 |
| NM_152568 | FLJ25169  | 0.16 | NM_173529 | MGC33382  | 0.16 |
| XM_092342 | FLJ39061  | 0.16 | XM_114156 | LOC200213 | 0.16 |
| NM_173546 | MGC35097  | 0.16 | NM_199460 | LOC283439 | 0.16 |
| NM_173654 | MGC34132  | 0.16 | NM_199342 | LOC374969 | 0.16 |
| NM_182623 | FLJ36766  | 0.16 | NM_203347 | UNQ2541   | 0.16 |
| NM_207508 | FLJ45478  | 0.16 | NM_013440 | PILRB     | 0.16 |
| NM_207453 | FLJ35934  | 0.16 | XM_060417 | LOC127295 | 0.16 |
| XM_291745 | LOC338611 | 0.16 | XM_373092 | LOC391807 | 0.16 |
| XM_374172 | LOC389403 | 0.16 | XM_374590 | LOC392850 | 0.16 |
| XM_374917 | LOC399937 | 0.16 | XM_373647 | LOC388171 | 0.16 |
| XM_378810 | LOC400706 | 0.16 | NM_133474 | KIAA1982  | 0.16 |
| NM_001893 | CSNK1D    | 0.17 | NM_005316 | GTF2H1    | 0.17 |
| NM_006823 | PKIA      | 0.17 | NM_021133 | RNASEL    | 0.17 |
| NM_182691 | SRPK2     | 0.17 | NM_006281 | STK3      | 0.17 |

|           |           |      |           |               |      |
|-----------|-----------|------|-----------|---------------|------|
| NM_003553 | OR1E1     | 0.17 | NM_001051 | SSTR3         | 0.17 |
| NM_005284 | GPR6      | 0.17 | NM_005138 | SCO2          | 0.17 |
| NM_001078 | VCAM1     | 0.17 | NM_002718 | PPP2R3A       | 0.17 |
| NM_024301 | FKRP      | 0.17 | NM_022122 | MMP27         | 0.17 |
| NM_006811 | TDE1      | 0.17 | NM_016936 | UBN1          | 0.17 |
| NM_000463 | UGT1A1    | 0.17 | NM_006187 | OAS3          | 0.17 |
| NM_004901 | LYSAL1    | 0.17 | NM_006983 | MMP23A        | 0.17 |
| NM_006292 | TSG101    | 0.17 | NM_001159 | AOX1          | 0.17 |
| NM_004423 | DVL3      | 0.17 | NM_006939 | SOS2          | 0.17 |
| NM_032557 | USP38     | 0.17 | NM_001783 | CD79A         | 0.17 |
| NM_004798 | KIF3B     | 0.17 | NM_054027 | ANKH          | 0.17 |
| NM_015186 | VPS13A    | 0.17 | NM_021097 | SLC8A1        | 0.17 |
| NM_014617 | CRYGA     | 0.17 | NM_017700 | FLJ20184      | 0.17 |
| NM_001994 | F13B      | 0.17 | NM_032242 | PLXNA1        | 0.17 |
| NM_012272 | HYPC      | 0.17 | NM_001605 | AARS          | 0.17 |
| NM_015285 | WDR7      | 0.17 | NM_002250 | KCNN4         | 0.17 |
| XM_039877 | MUC5B     | 0.17 | NM_007105 | SLC22A1LS     | 0.17 |
| NM_003445 | ZNF155    | 0.17 | XM_380170 | PDE4DIP       | 0.17 |
| NM_003830 | SIGLEC5   | 0.17 | NM_005707 | PDCD7         | 0.17 |
| NM_021994 | ZNF277    | 0.17 | NM_007220 | CA5B          | 0.17 |
| NM_015429 | TARSH     | 0.17 | NM_014046 | MRPS18B       | 0.17 |
| NM_014390 | SND1      | 0.17 | NM_016648 | HDCMA18P      | 0.17 |
| NM_018927 | PCDHGB7   | 0.17 | XM_046600 | KIAA1272      | 0.17 |
| NM_022842 | CDCP1     | 0.17 | NM_024663 | NPEPL1        | 0.17 |
| NM_024783 | FLJ23598  | 0.17 | NM_024785 | FLJ22746      | 0.17 |
| NM_030573 | THAP7     | 0.17 | NM_025075 | NIF3L1BP1     | 0.17 |
| NM_031467 | SLC4A9    | 0.17 | NM_032353 | MGC10540      | 0.17 |
| NM_033082 | CIP29     | 0.17 | NM_052848 | MGC20255      | 0.17 |
| NM_033452 | TRIM47    | 0.17 | NM_182492 | DKFZP434O0213 | 0.17 |
| NM_173846 | C14ORF8   | 0.17 | NM_080746 | RPL10L        | 0.17 |
| NM_024708 | ASB7      | 0.17 | XM_047734 | LOC146489     | 0.17 |
| NM_153291 | FAM10A5   | 0.17 | NM_152498 | FLJ32000      | 0.17 |
| NM_144963 | FLJ23790  | 0.17 | NM_145180 | C21ORF94      | 0.17 |
| XM_173036 | LOC255654 | 0.17 | NM_181718 | LOC253982     | 0.17 |
| XM_208778 | LOC283677 | 0.17 | NM_182564 | FLJ40319      | 0.17 |
| NM_181572 | RGSL1     | 0.17 | NM_198517 | FLJ00332      | 0.17 |
| XM_066752 | LOC139542 | 0.17 | XM_371755 | LOC401198     | 0.17 |
| XM_377943 | LOC402275 | 0.17 | XM_379515 | LOC401397     | 0.17 |
| XM_379517 | LOC401399 | 0.17 | XM_379619 | LOC401490     | 0.17 |
| XM_374637 | LOC392965 | 0.17 | XM_378228 | LOC399768     | 0.17 |
| XM_373519 | LOC387823 | 0.17 | XM_370729 | LOC387934     | 0.17 |
| XM_373789 | LOC388496 | 0.17 | XM_373359 | LOC392512     | 0.17 |
| XM_374343 | LOC389910 | 0.17 | NM_212556 | ASB18         | 0.17 |
| NM_138733 | PGK2      | 0.18 | NM_002089 | CXCL2         | 0.18 |
| NM_006727 | CDH10     | 0.18 | NM_020794 | KIAA1365      | 0.18 |
| NM_016374 | ARID4B    | 0.18 | NM_020436 | SALL4         | 0.18 |

|           |           |      |           |           |      |
|-----------|-----------|------|-----------|-----------|------|
| NM_004405 | DLX2      | 0.18 | NM_005229 | ELK1      | 0.18 |
| NM_001775 | CD38      | 0.18 | NM_002800 | PSMB9     | 0.18 |
| NM_014235 | UBL4      | 0.18 | NM_004613 | TGM2      | 0.18 |
| NM_005045 | RELN      | 0.18 | NM_002537 | OAZ2      | 0.18 |
| NM_000103 | CYP19A1   | 0.18 | NM_004871 | GOSR1     | 0.18 |
| NM_001790 | CDC25C    | 0.18 | NM_003894 | PER2      | 0.18 |
| NM_005693 | NR1H3     | 0.18 | NM_004980 | KCND3     | 0.18 |
| NM_020675 | SPC25     | 0.18 | NM_005174 | ATP5C1    | 0.18 |
| NM_139286 | CDC26     | 0.18 | NM_001264 | CDSN      | 0.18 |
| NM_002094 | GSPT1     | 0.18 | NM_016133 | INSIG2    | 0.18 |
| XM_375550 | SHC2      | 0.18 | NM_006607 | PTTG2     | 0.18 |
| NM_001816 | CEACAM8   | 0.18 | NM_006234 | POLR2J    | 0.18 |
| XM_291723 | AKR1CL1   | 0.18 | NM_006750 | SNTB2     | 0.18 |
| NM_003155 | STC1      | 0.18 | NM_003715 | VDP       | 0.18 |
| NM_006036 | KIAA0436  | 0.18 | NM_014639 | KIAA0372  | 0.18 |
| NM_006791 | MORF4L1   | 0.18 | NM_031456 | FBXW10    | 0.18 |
| NM_015503 | SH2B      | 0.18 | NM_015584 | POLDIP2   | 0.18 |
| NM_014008 | JM1       | 0.18 | NM_014415 | ZBTB11    | 0.18 |
| NM_181836 | CGI-109   | 0.18 | NM_015946 | PELO      | 0.18 |
| NM_019000 | FLJ20152  | 0.18 | NM_031274 | TEX13A    | 0.18 |
| NM_020201 | NT5M      | 0.18 | NM_020235 | BBX       | 0.18 |
| NM_022058 | SLC4A10   | 0.18 | NM_020536 | CSRP2BP   | 0.18 |
| NM_022659 | EBF2      | 0.18 | NM_031231 | APBA2BP   | 0.18 |
| NM_023944 | CYP4F12   | 0.18 | NM_024336 | IRX3      | 0.18 |
| NM_153182 | MINA      | 0.18 | NM_032368 | LZIC      | 0.18 |
| NM_032735 | MGC13168  | 0.18 | NM_080664 | C14ORF126 | 0.18 |
| NM_033409 | C20ORF54  | 0.18 | NM_052913 | KIAA1913  | 0.18 |
| NM_144573 | NEXN      | 0.18 | XM_062690 | ASCL4     | 0.18 |
| NM_144627 | SSTK-IP   | 0.18 | NM_139172 | MDAC1     | 0.18 |
| NM_152523 | FLJ40432  | 0.18 | XM_168053 | C6ORF184  | 0.18 |
| XM_371057 | LOC201175 | 0.18 | NM_152914 | MGC33894  | 0.18 |
| XM_211736 | LOC285016 | 0.18 | XM_211345 | LOC284134 | 0.18 |
| XM_171892 | LOC253013 | 0.18 | XM_377778 | LOC402110 | 0.18 |
| XM_374046 | LOC389142 | 0.18 | XM_373852 | LOC388648 | 0.18 |
| XM_376532 | LOC401272 | 0.18 | XM_374175 | LOC389413 | 0.18 |
| XM_373214 | LOC392145 | 0.18 | XM_380140 | LOC402589 | 0.18 |
| XM_372423 | LOC390231 | 0.18 | XM_370837 | LOC388080 | 0.18 |
| XM_375575 | LOC400677 | 0.18 | XM_374323 | LOC389841 | 0.18 |
| NM_003688 | CASK      | 0.19 | NM_020639 | ANKRD3    | 0.19 |
| XM_047355 | KIAA1765  | 0.19 | NM_018267 | H2AFJ     | 0.19 |
| NM_006399 | BATF      | 0.19 | NM_001888 | CRYM      | 0.19 |
| NM_001909 | CTSD      | 0.19 | NM_019094 | NUDT4     | 0.19 |
| NM_016237 | ANAPC5    | 0.19 | NM_004985 | KRAS2     | 0.19 |
| NM_017703 | FBXL12    | 0.19 | NM_012326 | MAPRE3    | 0.19 |
| NM_002470 | MYH3      | 0.19 | NM_006900 | IFNA13    | 0.19 |
| NM_005092 | TNFSF18   | 0.19 | NM_006687 | ACTL7A    | 0.19 |

|           |           |      |              |            |      |
|-----------|-----------|------|--------------|------------|------|
| NM_022839 | MRPS11    | 0.19 | NM_004982    | KCNJ8      | 0.19 |
| NM_014461 | CNTN6     | 0.19 | NM_014417    | BBC3       | 0.19 |
| NM_153443 | KIR3DL3   | 0.19 | NM_002567    | PBP        | 0.19 |
| NR_001569 | ADAM3A    | 0.19 | NM_002925    | RGS10      | 0.19 |
| NM_005662 | VDAC3     | 0.19 | NM_003585    | DOC2B      | 0.19 |
| NM_003732 | EIF4EBP3  | 0.19 | NM_014700    | RAB11-FIP3 | 0.19 |
| NM_015127 | MCLC      | 0.19 | NM_014939    | KIAA1012   | 0.19 |
| NM_014612 | C9ORF10   | 0.19 | NM_015476    | C18ORF10   | 0.19 |
| NM_015553 | PIP3-E    | 0.19 | NM_021093    | PYY2       | 0.19 |
| NM_022720 | DGCR8     | 0.19 | NM_016395    | HSPC121    | 0.19 |
| NM_018201 | TBC1D13   | 0.19 | NM_017661    | SUHW4      | 0.19 |
| NM_018022 | FLJ10199  | 0.19 | NM_018356    | FLJ11193   | 0.19 |
| NM_017769 | KIAA1333  | 0.19 | NM_030798    | WBSCR16    | 0.19 |
| NM_032579 | RETNLB    | 0.19 | NM_032816    | FLJ14640   | 0.19 |
| NM_032338 | MGC14817  | 0.19 | NM_024586    | OSBPL9     | 0.19 |
| NM_138786 | LOC116441 | 0.19 | NM_053050    | MRPL53     | 0.19 |
| NM_153208 | MGC35048  | 0.19 | XM_371010    | MGC49942   | 0.19 |
| NM_213598 | ZNF543    | 0.19 | NM_152378    | FLJ31052   | 0.19 |
| NM_175873 | LOC134548 | 0.19 | NM_153339    | FLJ90811   | 0.19 |
| NM_181534 | KRT25A    | 0.19 | NM_152475    | MGC34079   | 0.19 |
| NM_182521 | ZSWIM2    | 0.19 | NM_173851    | SLC30A8    | 0.19 |
| NM_152591 | FLJ35843  | 0.19 | NM_152635    | OIT3       | 0.19 |
| NM_194247 | HNRNPA3   | 0.19 | NM_173638    | MGC8902    | 0.19 |
| NM_182590 | FLJ33651  | 0.19 | XM_376238    | LOC285331  | 0.19 |
| NM_206831 | DESR1     | 0.19 | NM_198557    | FLJ45645   | 0.19 |
| NM_199000 | LHFPL3    | 0.19 | NM_001004127 | LOC440138  | 0.19 |
| XM_058931 | LOC125704 | 0.19 | XM_060054    | LOC139793  | 0.19 |
| XM_372764 | LOC391004 | 0.19 | XM_380150    | LOC402603  | 0.19 |
| XM_372047 | LOC389668 | 0.19 | XM_379809    | LOC402481  | 0.19 |
| XM_380045 | LOC402696 | 0.19 | XM_373500    | LOC387771  | 0.19 |
| XM_374902 | LOC399917 | 0.19 | XM_373780    | LOC388481  | 0.19 |
| XM_372695 | LOC390859 | 0.19 | XM_378988    | LOC400849  | 0.19 |
| XM_372274 | LOC389907 | 0.19 | NM_002739    | PRKCG      | 0.2  |
| NM_014183 | DNCL2A    | 0.2  | NM_004459    | FALZ       | 0.2  |
| NM_015477 | SIN3A     | 0.2  | NM_003084    | SNAPC3     | 0.2  |
| NM_005225 | E2F1      | 0.2  | NM_001964    | EGR1       | 0.2  |
| NM_006492 | ALX3      | 0.2  | NM_013351    | TBX21      | 0.2  |
| NM_016142 | HSD17B12  | 0.2  | NM_014265    | ADAM28     | 0.2  |
| XM_370630 | PPP1R14B  | 0.2  | NM_006699    | MAN1A2     | 0.2  |
| NM_003449 | TRIM26    | 0.2  | NM_001718    | BMP6       | 0.2  |
| NM_004513 | IL16      | 0.2  | NM_002341    | LTB        | 0.2  |
| NM_000834 | GRIN2B    | 0.2  | NM_057088    | KRT3       | 0.2  |
| NM_000427 | LOR       | 0.2  | NM_003661    | APOL1      | 0.2  |
| NM_006922 | SCN3A     | 0.2  | NM_004974    | KCNA2      | 0.2  |
| NM_005722 | ACTR2     | 0.2  | NM_031942    | CDCA7      | 0.2  |
| AK056774  | H19       | 0.2  | NM_013374    | PDCD6IP    | 0.2  |



|              |           |      |           |           |      |
|--------------|-----------|------|-----------|-----------|------|
| NM_152309    | PIK3AP1   | 0.2  | NM_005842 | SPRY2     | 0.2  |
| NM_005637    | SS18      | 0.2  | NM_005968 | HNRPM     | 0.2  |
| NM_002364    | MAGEB2    | 0.2  | NM_004594 | SLC9A5    | 0.2  |
| XM_352937    | TBX15     | 0.2  | XM_032693 | KIAA0420  | 0.2  |
| NM_016940    | C21ORF6   | 0.2  | XM_375045 | C14ORF92  | 0.2  |
| NM_006426    | DPYSL4    | 0.2  | NM_015481 | ZNF385    | 0.2  |
| NM_016018    | CGI-72    | 0.2  | NM_015914 | LOC51061  | 0.2  |
| NM_019026    | LOC54499  | 0.2  | NM_016024 | RBMX2     | 0.2  |
| NM_017708    | FLJ20200  | 0.2  | NM_018352 | FLJ11184  | 0.2  |
| XM_290842    | LRFN1     | 0.2  | NM_021196 | SLC4A5    | 0.2  |
| NM_031420    | MRPL9     | 0.2  | NM_022129 | MAWBP     | 0.2  |
| NM_024307    | MGC4171   | 0.2  | NM_030818 | MGC10471  | 0.2  |
| NM_032806    | FLJ14566  | 0.2  | NM_032524 | KRTAP4-4  | 0.2  |
| NM_033121    | ANKRD13   | 0.2  | NM_144584 | FLJ30525  | 0.2  |
| NM_052944    | SLC5A11   | 0.2  | NM_138453 | RAB3C     | 0.2  |
| NM_145691    | ATPAF2    | 0.2  | NM_173475 | MGC48972  | 0.2  |
| NM_144591    | C10ORF32  | 0.2  | NM_144694 | ZNF570    | 0.2  |
| NM_153709    | MGC40168  | 0.2  | NM_153041 | FLJ32955  | 0.2  |
| XM_097580    | LOC149086 | 0.2  | NM_144962 | MGC22776  | 0.2  |
| XM_089747    | C10ORF80  | 0.2  | XM_378226 | C10ORF128 | 0.2  |
| NM_152612    | FLJ36046  | 0.2  | NM_153367 | C10ORF56  | 0.2  |
| NM_178836    | LOC201164 | 0.2  | NM_152726 | FLJ34588  | 0.2  |
| NM_152787    | TAB3      | 0.2  | NM_198278 | LOC255743 | 0.2  |
| NM_174962    | SSX9      | 0.2  | XM_378687 | LOC339210 | 0.2  |
| XM_290835    | ZNF181    | 0.2  | XM_290579 | LOC338797 | 0.2  |
| NM_182611    | GPR144    | 0.2  | NM_198519 | MGC12965  | 0.2  |
| XM_088578    | LOC375748 | 0.2  | NM_004193 | GBF1      | 0.2  |
| NM_138397    | LOC93082  | 0.2  | XM_291544 | LOC343384 | 0.2  |
| XM_208809    | LOC283726 | 0.2  | XM_209041 | LOC284158 | 0.2  |
| XM_096642    | LOC144631 | 0.2  | XM_371244 | LOC388624 | 0.2  |
| XM_379135    | LOC401005 | 0.2  | XM_379381 | LOC401225 | 0.2  |
| XM_371690    | LOC389202 | 0.2  | XM_374949 | LOC399979 | 0.2  |
| NM_001004345 | FLJ16124  | 0.2  | NM_005204 | MAP3K8    | 0.21 |
| NM_005884    | PAK4      | 0.21 | NM_002757 | MAP2K5    | 0.21 |
| NM_013939    | OR10H2    | 0.21 | NM_016568 | SALPR     | 0.21 |
| NM_032551    | GPR54     | 0.21 | NM_003389 | CORO2A    | 0.21 |
| NM_001232    | CASQ2     | 0.21 | NM_019071 | ING3      | 0.21 |
| NM_002471    | MYH6      | 0.21 | NM_004343 | CALR      | 0.21 |
| NM_001198    | PRDM1     | 0.21 | NM_002229 | JUNB      | 0.21 |
| NM_014269    | ADAM29    | 0.21 | NM_000263 | NAGLU     | 0.21 |
| NM_024831    | NCOA6IP   | 0.21 | NM_025003 | ADAMTS20  | 0.21 |
| XM_088476    | TXNDC4    | 0.21 | NM_000377 | WAS       | 0.21 |
| NM_015601    | HERC4     | 0.21 | NM_012308 | FBXL11    | 0.21 |
| NM_000577    | IL1RN     | 0.21 | NM_001146 | ANGPT1    | 0.21 |
| NM_002965    | S100A9    | 0.21 | NM_019101 | APOM      | 0.21 |
| NM_002385    | MBP       | 0.21 | NM_005436 | CCDC6     | 0.21 |

|           |              |      |              |               |      |
|-----------|--------------|------|--------------|---------------|------|
| NM_024744 | ALS2CR8      | 0.21 | NM_005075    | SLCO1A2       | 0.21 |
| NM_003478 | CUL5         | 0.21 | NM_003949    | HAP1          | 0.21 |
| NM_014641 | MDC1         | 0.21 | NM_145039    | MGC16385      | 0.21 |
| NM_002087 | GRN          | 0.21 | NM_001384    | DPH2L2        | 0.21 |
| XM_031246 | ROBO2        | 0.21 | NM_005425    | TNP2          | 0.21 |
| NM_005082 | TRIM25       | 0.21 | NM_174910    | TCTE3         | 0.21 |
| NM_004839 | HOMER2       | 0.21 | NM_021064    | HIST1H2AG     | 0.21 |
| XM_375032 | TBC1D4       | 0.21 | NM_021144    | PSIP1         | 0.21 |
| NM_007047 | BTN3A2       | 0.21 | NM_014954    | RPH3A         | 0.21 |
| NM_015510 | DKFZP566O084 | 0.21 | NM_016590    | PART1         | 0.21 |
| NM_019040 | ELP4         | 0.21 | NM_023003    | TM6SF1        | 0.21 |
| NM_016200 | LSM8         | 0.21 | NM_017540    | GALNT10       | 0.21 |
| NM_020145 | SH3GLB2      | 0.21 | NM_021940    | SMAP1         | 0.21 |
| NM_032461 | SPANXB1      | 0.21 | NM_030899    | ZNF323        | 0.21 |
| NM_024511 | C4ORF15      | 0.21 | NM_024584    | FLJ13646      | 0.21 |
| NM_025031 | FLJ21075     | 0.21 | NM_203447    | DOCK8         | 0.21 |
| NM_032269 | DKFZP434I099 | 0.21 | NM_031289    | GSG1          | 0.21 |
| NM_032354 | MGC10744     | 0.21 | NM_032856    | FLJ14888      | 0.21 |
| NM_138771 | LOC90693     | 0.21 | XM_033370    | ZFH2          | 0.21 |
| NM_080866 | SLC22A9      | 0.21 | NM_054024    | MIA2          | 0.21 |
| NM_152321 | FLJ32115     | 0.21 | NM_144577    | FLJ32926      | 0.21 |
| NM_058219 | EXOSC6       | 0.21 | NM_152389    | MGC35338      | 0.21 |
| NM_152395 | FLJ31265     | 0.21 | NM_144622    | FLJ32934      | 0.21 |
| NM_152440 | FLJ32549     | 0.21 | XM_167147    | ZNF390        | 0.21 |
| NM_152777 | C14ORF48     | 0.21 | NM_173647    | RNF149        | 0.21 |
| NM_173671 | FLJ37396     | 0.21 | NM_173672    | PPIL6         | 0.21 |
| NM_181807 | DCDC1        | 0.21 | NM_182608    | DKFZP686O1689 | 0.21 |
| NM_178353 | LCE1E        | 0.21 | NM_198538    | UNQ698        | 0.21 |
| NM_207441 | FLJ42220     | 0.21 | XM_117239    | LOC200491     | 0.21 |
| XM_086725 | LOC149934    | 0.21 | XM_291757    | LOC340893     | 0.21 |
| XM_291885 | LOC341112    | 0.21 | XM_378874    | LOC400761     | 0.21 |
| XM_371783 | LOC389347    | 0.21 | XM_374192    | LOC389447     | 0.21 |
| XM_376486 | LOC401250    | 0.21 | XM_380136    | LOC402582     | 0.21 |
| XM_380151 | LOC402617    | 0.21 | XM_372078    | LOC389710     | 0.21 |
| XM_379643 | LOC401530    | 0.21 | XM_378223    | LOC399753     | 0.21 |
| XM_372305 | LOC389941    | 0.21 | XM_371053    | LOC388381     | 0.21 |
| XM_352159 | LOC388215    | 0.21 | NM_001004332 | FLJ41170      | 0.21 |
| XM_372254 | LOC389892    | 0.21 | NM_017988    | FLJ10074      | 0.22 |
| NM_002577 | PAK2         | 0.22 | NM_006258    | PRKG1         | 0.22 |
| NM_005298 | GPR25        | 0.22 | NM_001881    | CREM          | 0.22 |
| NM_004492 | GTF2A2       | 0.22 | NM_020781    | ZNF398        | 0.22 |
| NM_004040 | RHOB         | 0.22 | NM_000405    | GM2A          | 0.22 |
| NM_002096 | GTF2F1       | 0.22 | NM_003733    | OASL          | 0.22 |
| NM_007202 | AKAP10       | 0.22 | NM_004158    | PSPN          | 0.22 |
| NM_000138 | FBN1         | 0.22 | NM_005481    | THRAP5        | 0.22 |
| NM_005268 | GJB5         | 0.22 | NM_006538    | BCL2L11       | 0.22 |

|              |           |      |           |           |      |
|--------------|-----------|------|-----------|-----------|------|
| NM_005199    | CHRNA     | 0.22 | NM_004446 | EPRS      | 0.22 |
| NM_002114    | HIVEP1    | 0.22 | NM_006851 | GLIPR1    | 0.22 |
| NM_002907    | RECQL     | 0.22 | NM_004828 | NCR2      | 0.22 |
| NM_002338    | LSAMP     | 0.22 | NM_032432 | ABLIM2    | 0.22 |
| NM_145698    | ACBD5     | 0.22 | NM_013362 | ZNF225    | 0.22 |
| XM_168302    | ZNF36     | 0.22 | NM_014779 | KIAA0669  | 0.22 |
| NM_005832    | KCNMB2    | 0.22 | XM_375848 | KIAA0792  | 0.22 |
| NM_005862    | STAG1     | 0.22 | NM_006455 | SC65      | 0.22 |
| NM_012255    | XRN2      | 0.22 | NM_015210 | KIAA0802  | 0.22 |
| NM_014282    | HABP4     | 0.22 | NM_012456 | TIMM10    | 0.22 |
| NM_015649    | IRF2BP1   | 0.22 | NM_007052 | NOX1      | 0.22 |
| NM_130459    | TOR2A     | 0.22 | NM_016129 | COPS4     | 0.22 |
| NM_019048    | NS3TP1    | 0.22 | NM_017905 | C13ORF11  | 0.22 |
| NM_018366    | CNO       | 0.22 | NM_018247 | TMEM30A   | 0.22 |
| NM_018309    | FLJ11046  | 0.22 | NM_020362 | HT014     | 0.22 |
| NM_020398    | SPINLW1   | 0.22 | NM_199483 | C20ORF24  | 0.22 |
| XM_370928    | KIAA1171  | 0.22 | XM_371576 | KIAA1189  | 0.22 |
| XM_050644    | KIAA1623  | 0.22 | XM_370682 | KIAA1467  | 0.22 |
| NM_022353    | OSGEPL1   | 0.22 | NM_022918 | FLJ22104  | 0.22 |
| NM_024753    | FLJ11457  | 0.22 | NM_024672 | THAP9     | 0.22 |
| NM_024806    | FLJ23554  | 0.22 | NM_024911 | FLJ23091  | 0.22 |
| NM_032574    | LOC84661  | 0.22 | NM_032328 | MGC12458  | 0.22 |
| NM_032336    | MGC14799  | 0.22 | NM_032349 | SDOS      | 0.22 |
| NM_032858    | FLJ14904  | 0.22 | NM_139240 | LOC92346  | 0.22 |
| NM_173468    | MOBK1A    | 0.22 | XM_058743 | LOC123876 | 0.22 |
| NM_201614    | IKIP      | 0.22 | NM_138803 | LOC130940 | 0.22 |
| NM_194318    | B3GTL     | 0.22 | NM_152465 | MGC39650  | 0.22 |
| NM_170610    | HIST1H2BA | 0.22 | NM_198827 | GPR133    | 0.22 |
| NM_175900    | FLJ35681  | 0.22 | XM_375446 | FLJ11822  | 0.22 |
| NM_198507    | UNQ1912   | 0.22 | NM_207373 | C10ORF99  | 0.22 |
| NM_178012    | MGC8685   | 0.22 | NM_207419 | C1QTNF8   | 0.22 |
| XM_209569    | LOC285329 | 0.22 | XM_371313 | LOC388698 | 0.22 |
| XM_376074    | LOC400968 | 0.22 | XM_376048 | LOC400949 | 0.22 |
| XM_372311    | LOC389958 | 0.22 | XM_370758 | LOC387978 | 0.22 |
| XM_370905    | LOC388174 | 0.22 | XM_373692 | LOC388291 | 0.22 |
| NM_001001346 | CLDN20    | 0.22 | XM_373945 | LOC388849 | 0.22 |
| XM_377072    | LOC401623 | 0.22 | NM_214461 | MGC50273  | 0.22 |
| NM_001465    | FYB       | 0.23 | NM_000115 | EDNRB     | 0.23 |
| NM_003029    | SHC1      | 0.23 | NM_005613 | RGS4      | 0.23 |
| NM_014626    | GPR58     | 0.23 | NM_001235 | SERPINH1  | 0.23 |
| NM_005982    | SIX1      | 0.23 | NM_003200 | TCF3      | 0.23 |
| NM_001333    | CTSL2     | 0.23 | NM_006229 | PNLIPRP1  | 0.23 |
| NM_002769    | PRSS1     | 0.23 | NM_014382 | ATP2C1    | 0.23 |
| NM_016529    | ATP8A2    | 0.23 | NM_004620 | TRAF6     | 0.23 |
| NM_032622    | LNX       | 0.23 | NM_004577 | PSPH      | 0.23 |
| NM_001559    | IL12RB2   | 0.23 | NM_014211 | GABRP     | 0.23 |

|           |           |      |           |           |      |
|-----------|-----------|------|-----------|-----------|------|
| NM_015102 | NPHP4     | 0.23 | NM_019604 | CRTAM     | 0.23 |
| NM_033183 | CGB8      | 0.23 | NM_006726 | LRBA      | 0.23 |
| NM_006986 | MAGED1    | 0.23 | NM_004077 | CS        | 0.23 |
| NM_000779 | CYP4B1    | 0.23 | NM_000782 | CYP24A1   | 0.23 |
| NM_001404 | EEF1G     | 0.23 | XM_495860 | MUC5AC    | 0.23 |
| NM_031887 | PMCHL1    | 0.23 | NM_033087 | ALG2      | 0.23 |
| NM_002998 | SDC2      | 0.23 | NM_003008 | SEMG2     | 0.23 |
| NM_006762 | LAPTM5    | 0.23 | NM_145330 | MRPL33    | 0.23 |
| NM_004786 | TXNL1     | 0.23 | NM_004800 | TM9SF2    | 0.23 |
| NM_014642 | IQCB1     | 0.23 | NM_014908 | TMEM15    | 0.23 |
| NM_012405 | ICMT      | 0.23 | NM_014187 | HSPC171   | 0.23 |
| NM_016479 | SCOTIN    | 0.23 | NM_013379 | DPP7      | 0.23 |
| NM_019007 | FLJ20811  | 0.23 | NM_018407 | LAPTM4B   | 0.23 |
| NM_017816 | LYAR      | 0.23 | NM_018590 | GALNACT-2 | 0.23 |
| NM_030567 | MGC10772  | 0.23 | NM_025227 | BPIL1     | 0.23 |
| NM_033260 | FOXQ1     | 0.23 | XM_371838 | USP45     | 0.23 |
| NM_181705 | LOC90624  | 0.23 | NM_152365 | FLJ34633  | 0.23 |
| NM_080868 | ASB17     | 0.23 | NM_152415 | FLJ32642  | 0.23 |
| NM_144660 | SAMD8     | 0.23 | NM_144659 | TCP10L    | 0.23 |
| NM_173516 | PNLDC1    | 0.23 | NM_144716 | MGC23918  | 0.23 |
| NM_173557 | RNF152    | 0.23 | NM_153274 | VMD2L2    | 0.23 |
| NM_173618 | FLJ90652  | 0.23 | NM_173665 | MGC34713  | 0.23 |
| XM_209490 | LOC285148 | 0.23 | NM_173637 | MGC34725  | 0.23 |
| AK091675  | LOC286087 | 0.23 | XM_113916 | LOC201181 | 0.23 |
| XM_211983 | LOC285694 | 0.23 | XM_167254 | LOC221875 | 0.23 |
| XM_374091 | LOC389233 | 0.23 | XM_374188 | LOC389440 | 0.23 |
| XM_372111 | LOC389752 | 0.23 | XM_379547 | LOC401445 | 0.23 |
| XM_374898 | LOC399909 | 0.23 | XM_373341 | LOC392439 | 0.23 |
| NM_001319 | CSNK1G2   | 0.24 | NM_024652 | LRRK1     | 0.24 |
| NM_001744 | CAMK4     | 0.24 | NM_004157 | PRKAR2A   | 0.24 |
| NM_002447 | MST1R     | 0.24 | NM_007197 | FZD10     | 0.24 |
| NM_005308 | GRK5      | 0.24 | NM_148962 | OXER1     | 0.24 |
| NM_001265 | CDX2      | 0.24 | NM_002478 | MYOD1     | 0.24 |
| NM_005643 | TAF11     | 0.24 | NM_001685 | ATP5J     | 0.24 |
| NM_000270 | NP        | 0.24 | NM_003260 | TLE2      | 0.24 |
| NM_000390 | CHM       | 0.24 | NM_015089 | PARC      | 0.24 |
| NM_003958 | RNF8      | 0.24 | NM_003031 | SIAH1     | 0.24 |
| XM_290527 | USP35     | 0.24 | NM_014053 | FLVCR     | 0.24 |
| NM_181449 | IREM2     | 0.24 | NM_006419 | CXCL13    | 0.24 |
| NM_002608 | PDGFB     | 0.24 | NM_005556 | KRT7      | 0.24 |
| NM_004048 | B2M       | 0.24 | NM_004354 | CCNG2     | 0.24 |
| NM_018602 | DNAJA4    | 0.24 | NM_018649 | H2AFY2    | 0.24 |
| NM_152468 | EVER2     | 0.24 | XM_376683 | LCHN      | 0.24 |
| NM_005534 | IFNGR2    | 0.24 | NM_004099 | STOM      | 0.24 |
| XM_166300 | AIM1      | 0.24 | NM_001245 | SIGLEC6   | 0.24 |
| NM_031498 | GNGT2     | 0.24 | NM_023037 | 13CDNA73  | 0.24 |

|           |           |      |           |           |      |
|-----------|-----------|------|-----------|-----------|------|
| NM_012328 | DNAJB9    | 0.24 | NM_006671 | SLC1A7    | 0.24 |
| NM_007212 | RNF2      | 0.24 | NM_003099 | SNX1      | 0.24 |
| NM_020634 | GDF3      | 0.24 | NM_006702 | NTE       | 0.24 |
| XM_037523 | KIAA1076  | 0.24 | NM_015061 | JMJD2C    | 0.24 |
| NM_012319 | SLC39A6   | 0.24 | NM_015535 | DNAPTP6   | 0.24 |
| NM_014066 | COMMD5    | 0.24 | NM_016417 | C14ORF87  | 0.24 |
| NM_015982 | YBX2      | 0.24 | NM_013397 | C6ORF49   | 0.24 |
| NM_018215 | FLJ10781  | 0.24 | XM_370618 | FLJ20294  | 0.24 |
| XM_378914 | KIAA0492  | 0.24 | NM_024324 | MGC11256  | 0.24 |
| NM_025221 | KCNIP4    | 0.24 | NM_031442 | TM4SF10   | 0.24 |
| NM_032323 | MGC13102  | 0.24 | NM_032658 | MGC10701  | 0.24 |
| XM_055636 | KIAA1912  | 0.24 | NM_138463 | LOC116238 | 0.24 |
| NM_152479 | MGC33962  | 0.24 | NM_178868 | CKLFSF8   | 0.24 |
| NM_182828 | GDF7      | 0.24 | NM_173522 | FLJ36576  | 0.24 |
| XM_116497 | C6ORF163  | 0.24 | NM_152780 | FLJ14503  | 0.24 |
| XM_172968 | LOC253962 | 0.24 | NM_173642 | MGC47816  | 0.24 |
| XM_370699 | PTPRQ     | 0.24 | NM_182628 | FLJ40083  | 0.24 |
| XM_291396 | LOC400735 | 0.24 | XM_379454 | LOC401284 | 0.24 |
| XM_377828 | LOC402160 | 0.24 | XM_379622 | LOC401491 | 0.24 |
| XM_373575 | LOC387946 | 0.24 | XM_370586 | LOC387723 | 0.24 |
| NM_004080 | DGKB      | 0.25 | NM_001261 | CDK9      | 0.25 |
| NM_005906 | MAK       | 0.25 | NM_005056 | JARID1A   | 0.25 |
| NM_001701 | BAAT      | 0.25 | NM_005700 | DPP3      | 0.25 |
| NM_012343 | NNT       | 0.25 | NM_016272 | TOB2      | 0.25 |
| NM_021103 | TMSB10    | 0.25 | NM_004104 | FASN      | 0.25 |
| NM_014861 | KIAA0703  | 0.25 | NM_006910 | RBBP6     | 0.25 |
| NM_007331 | WHSC1     | 0.25 | NM_002339 | LSP1      | 0.25 |
| NM_021077 | NMB       | 0.25 | NM_000799 | EPO       | 0.25 |
| NM_005720 | ARPC1B    | 0.25 | NM_003356 | UCP3      | 0.25 |
| NM_004086 | COCH      | 0.25 | NM_001196 | BID       | 0.25 |
| NM_015675 | GADD45B   | 0.25 | NM_000507 | FBP1      | 0.25 |
| X74144    | FOXG1C    | 0.25 | NM_006667 | PGRMC1    | 0.25 |
| NM_014045 | LRP10     | 0.25 | NM_005944 | MOX2      | 0.25 |
| NM_005792 | MPHOSPH6  | 0.25 | NM_001351 | DAZL      | 0.25 |
| NM_001374 | DNASE1L2  | 0.25 | NM_014384 | ACAD8     | 0.25 |
| NM_002803 | PSMC2     | 0.25 | NM_178559 | ABCB5     | 0.25 |
| NM_021194 | SLC30A1   | 0.25 | NM_003179 | SYP       | 0.25 |
| NM_003548 | HIST2H4   | 0.25 | NM_003961 | RHBDL1    | 0.25 |
| NM_004854 | CHST10    | 0.25 | NM_007172 | NUP50     | 0.25 |
| NM_015331 | NCSTN     | 0.25 | NM_014015 | DEXI      | 0.25 |
| NM_016628 | WAC       | 0.25 | NM_016267 | VGLL1     | 0.25 |
| NM_016599 | MYOZ2     | 0.25 | NM_017854 | FLJ20512  | 0.25 |
| NM_017632 | CARF      | 0.25 | NM_018229 | C14ORF108 | 0.25 |
| NM_019612 | R30953_1  | 0.25 | XM_166140 | SFMBT2    | 0.25 |
| NM_031899 | GORASP1   | 0.25 | NM_032477 | MRPL41    | 0.25 |
| NM_022078 | FLJ12455  | 0.25 | NM_030813 | SKD3      | 0.25 |

|              |           |      |           |           |      |
|--------------|-----------|------|-----------|-----------|------|
| NM_032046    | MSP       | 0.25 | NM_032802 | SPPL2A    | 0.25 |
| NM_033125    | SLC22A16  | 0.25 | NM_138396 | 39873     | 0.25 |
| NM_080739    | C20ORF141 | 0.25 | NM_145268 | LOC136263 | 0.25 |
| NM_181709    | LOC144347 | 0.25 | NM_152500 | FLJ33084  | 0.25 |
| NM_153015    | FLJ30668  | 0.25 | NM_144723 | FLJ31121  | 0.25 |
| NM_152577    | FLJ25735  | 0.25 | NM_152730 | C6ORF170  | 0.25 |
| XM_166164    | LOC219854 | 0.25 | NM_178169 | RASSF3    | 0.25 |
| NM_153264    | FLJ35880  | 0.25 | XM_208993 | MGC34829  | 0.25 |
| NM_173614    | LOC283820 | 0.25 | XM_379510 | FLJ34048  | 0.25 |
| NM_181648    | LOC286161 | 0.25 | XM_209559 | LOC285303 | 0.25 |
| XM_373894    | LOC388752 | 0.25 | XM_377887 | LOC402210 | 0.25 |
| XM_373106    | LOC391859 | 0.25 | XM_376522 | LOC401270 | 0.25 |
| XM_372323    | LOC389988 | 0.25 | NM_001345 | DGKA      | 0.26 |
| NM_004124    | GMFB      | 0.26 | NM_014920 | ICK       | 0.26 |
| NM_004586    | RPS6KA3   | 0.26 | NM_003876 | C17ORF35  | 0.26 |
| NM_002563    | P2RY1     | 0.26 | NM_023917 | TAS2R9    | 0.26 |
| NM_002474    | MYH11     | 0.26 | NM_006097 | MYL9      | 0.26 |
| NM_003280    | TNNC1     | 0.26 | NM_022066 | E2-230K   | 0.26 |
| NM_006203    | PDE4D     | 0.26 | NM_018837 | SULF2     | 0.26 |
| NM_173061    | CAST      | 0.26 | NM_001167 | BIRC4     | 0.26 |
| NM_015017    | USP33     | 0.26 | NM_001200 | BMP2      | 0.26 |
| NM_021175    | HAMP      | 0.26 | NM_002332 | LRP1      | 0.26 |
| NM_001438    | ESRRG     | 0.26 | NM_007247 | AP1GBP1   | 0.26 |
| NM_032122    | DTNBP1    | 0.26 | NM_024774 | FLJ21924  | 0.26 |
| NM_001458    | FLNC      | 0.26 | NM_001991 | EZH1      | 0.26 |
| NM_005385    | NKTR      | 0.26 | NM_003101 | SOAT1     | 0.26 |
| NM_006542    | SPHAR     | 0.26 | NM_004589 | SCO1      | 0.26 |
| NM_001635    | AMPH      | 0.26 | NM_001387 | DPYSL3    | 0.26 |
| NM_005050    | ABCD4     | 0.26 | NM_020141 | AD-020    | 0.26 |
| NM_002782    | PSG6      | 0.26 | NM_006925 | SFRS5     | 0.26 |
| NM_021107    | MRPS12    | 0.26 | XM_040709 | PTGFRN    | 0.26 |
| NM_001001502 | SNCB      | 0.26 | NM_003089 | SNRP70    | 0.26 |
| NM_003440    | ZNF140    | 0.26 | NM_033177 | BAT4      | 0.26 |
| NM_014637    | CHPPR     | 0.26 | NM_014713 | LAPTM4A   | 0.26 |
| NM_006998    | SCGN      | 0.26 | NM_015555 | ZNF451    | 0.26 |
| NM_016618    | LOC51315  | 0.26 | NM_018138 | FLJ10560  | 0.26 |
| NM_018224    | FLJ10803  | 0.26 | XM_375568 | HSZFP36   | 0.26 |
| NM_020215    | C14ORF132 | 0.26 | NM_021805 | SIGIRR    | 0.26 |
| NM_022480    | FLJ12587  | 0.26 | NM_022167 | XYLT2     | 0.26 |
| NM_024537    | FLJ12118  | 0.26 | NM_024659 | GTDC1     | 0.26 |
| NM_053023    | ZFP91     | 0.26 | NM_025040 | ZNF614    | 0.26 |
| NM_032429    | LZTS2     | 0.26 | XM_373431 | LOC87769  | 0.26 |
| NM_032905    | RBM17     | 0.26 | NM_144575 | CAPN13    | 0.26 |
| XM_044166    | LOC92312  | 0.26 | NM_152303 | ZNF554    | 0.26 |
| NM_031946    | CENTG3    | 0.26 | NM_144638 | MGC29956  | 0.26 |
| NM_080625    | C20ORF160 | 0.26 | NM_178818 | CKLFSF4   | 0.26 |

|              |           |      |           |           |      |
|--------------|-----------|------|-----------|-----------|------|
| NM_152476    | ZNF560    | 0.26 | NM_173080 | SPRR4     | 0.26 |
| NM_182543    | NOPD1     | 0.26 | NM_173564 | FLJ37538  | 0.26 |
| NM_172139    | IL28B     | 0.26 | NM_152785 | GCET2     | 0.26 |
| XM_379295    | LOC285441 | 0.26 | NM_152467 | KLHL10    | 0.26 |
| XM_294680    | LOC338694 | 0.26 | NM_173699 | MGC33889  | 0.26 |
| NM_021250    | LIR9      | 0.26 | NM_207434 | FLJ46363  | 0.26 |
| XM_294906    | LOC339306 | 0.26 | XM_097347 | LOC147941 | 0.26 |
| XM_210054    | LOC286453 | 0.26 | XM_293407 | LOC347541 | 0.26 |
| XM_066695    | LOC139431 | 0.26 | XM_372917 | LOC391353 | 0.26 |
| XM_372807    | LOC391144 | 0.26 | XM_379309 | LOC401171 | 0.26 |
| XM_371680    | LOC389177 | 0.26 | XM_373223 | LOC392159 | 0.26 |
| XM_374145    | LOC389338 | 0.26 | XM_374858 | LOC399844 | 0.26 |
| XM_373627    | LOC388117 | 0.26 | XM_372704 | LOC390876 | 0.26 |
| NM_001004347 | MGC39584  | 0.26 | XM_373967 | LOC388914 | 0.26 |
| NM_005246    | FER       | 0.27 | NM_003488 | AKAP1     | 0.27 |
| NM_006201    | PCTK1     | 0.27 | NM_005813 | PRKCN     | 0.27 |
| NM_000794    | DRD1      | 0.27 | NM_014264 | PLK4      | 0.27 |
| NM_005912    | MC4R      | 0.27 | NM_018969 | SREB3     | 0.27 |
| NM_001795    | CDH5      | 0.27 | NM_000534 | PMS1      | 0.27 |
| NM_001486    | GCKR      | 0.27 | NM_002360 | MAFK      | 0.27 |
| NM_003878    | GGH       | 0.27 | NM_000849 | GSTM3     | 0.27 |
| NM_006755    | TALDO1    | 0.27 | NM_032144 | RAB6C     | 0.27 |
| NM_001441    | FAAH      | 0.27 | NM_016621 | BHC80     | 0.27 |
| NM_012411    | PTPN22    | 0.27 | NM_004166 | CCL14     | 0.27 |
| NM_173728    | ARHGEF15  | 0.27 | NM_006367 | CAP1      | 0.27 |
| XM_113641    | PPAPDC1   | 0.27 | NM_001111 | ADAR      | 0.27 |
| NM_001286    | CLCN6     | 0.27 | NM_006730 | DNASE1L1  | 0.27 |
| NM_002071    | GNAL      | 0.27 | NM_002579 | PALM      | 0.27 |
| NM_002406    | MGAT1     | 0.27 | NM_006946 | SPTBN2    | 0.27 |
| NM_194428    | DHX34     | 0.27 | NM_014810 | CAP350    | 0.27 |
| NM_005764    | MAP17     | 0.27 | NM_006476 | ATP5L     | 0.27 |
| NM_012309    | SHANK2    | 0.27 | XM_039570 | SEC15L2   | 0.27 |
| XM_032571    | KIAA0888  | 0.27 | NM_014117 | PRO0149   | 0.27 |
| NM_016121    | KCTD3     | 0.27 | NM_017915 | FLJ20641  | 0.27 |
| NM_018465    | C9ORF46   | 0.27 | XM_376550 | KIAA1423  | 0.27 |
| NM_020832    | KIAA1441  | 0.27 | NM_023075 | MPPE1     | 0.27 |
| NM_022478    | CDH24     | 0.27 | NM_024333 | FSD1      | 0.27 |
| NM_024582    | FATJ      | 0.27 | NM_025124 | FLJ21749  | 0.27 |
| NM_024929    | C6ORF59   | 0.27 | NM_031485 | GRWD1     | 0.27 |
| NM_032330    | CAPNS2    | 0.27 | NM_145041 | MGC20235  | 0.27 |
| NM_181307    | MRPL52    | 0.27 | NM_207322 | LOC145741 | 0.27 |
| NM_080832    | PABPC5    | 0.27 | NM_152544 | FLJ35725  | 0.27 |
| XM_171158    | MGC27348  | 0.27 | NM_152996 | SIAT7C    | 0.27 |
| NM_174938    | FRMD3     | 0.27 | NM_173613 | FLJ35785  | 0.27 |
| NM_207426    | FLJ46831  | 0.27 | XM_171040 | LOC253820 | 0.27 |
| XM_209668    | LOC285588 | 0.27 | XM_371711 | LOC389228 | 0.27 |

|           |           |      |              |           |      |
|-----------|-----------|------|--------------|-----------|------|
| XM_374256 | LOC389638 | 0.27 | XM_378473    | LOC400238 | 0.27 |
| XM_373740 | LOC388406 | 0.27 | XM_378698    | LOC400617 | 0.27 |
| XM_372693 | LOC390846 | 0.27 | NM_001004305 | LOC284757 | 0.27 |
| XM_373925 | LOC388813 | 0.27 | NM_174922    | ADCK5     | 0.28 |
| NM_003885 | CDK5R1    | 0.28 | NM_005544    | IRS1      | 0.28 |
| NM_012290 | TLK1      | 0.28 | NM_003985    | TNK1      | 0.28 |
| NM_003068 | SNAI2     | 0.28 | NM_003454    | ZNF200    | 0.28 |
| NM_006235 | POU2AF1   | 0.28 | NM_005376    | MYCL1     | 0.28 |
| NM_018945 | PDE7B     | 0.28 | NM_002194    | INPP1     | 0.28 |
| NM_007293 | C4A       | 0.28 | NM_007024    | PL6       | 0.28 |
| NM_000318 | PXMP3     | 0.28 | NM_016323    | HERC5     | 0.28 |
| XM_371813 | KIFC1     | 0.28 | NM_181429    | HT2R55    | 0.28 |
| NM_002211 | ITGB1     | 0.28 | NM_020402    | CHRNA10   | 0.28 |
| NM_004133 | HNF4G     | 0.28 | NM_000223    | KRT12     | 0.28 |
| NM_015365 | AMMECR1   | 0.28 | NM_005336    | HDLBP     | 0.28 |
| NM_012429 | SEC14L2   | 0.28 | NM_006110    | CD2BP2    | 0.28 |
| NM_005677 | COLQ      | 0.28 | NM_015576    | CAST      | 0.28 |
| NM_144571 | CNOT6L    | 0.28 | NM_001549    | IFIT4     | 0.28 |
| NM_014454 | SESN1     | 0.28 | NM_003487    | TAF15     | 0.28 |
| NM_003069 | SMARCA1   | 0.28 | NM_030979    | PABPC3    | 0.28 |
| NM_153028 | ZNF75A    | 0.28 | NM_003704    | C4ORF8    | 0.28 |
| NM_005475 | LNK       | 0.28 | NM_007055    | RPC155    | 0.28 |
| NM_012109 | C19ORF4   | 0.28 | NM_014577    | BRD1      | 0.28 |
| NM_014031 | SLC27A6   | 0.28 | NM_016302    | CRBN      | 0.28 |
| NM_017799 | C14ORF101 | 0.28 | NM_018186    | FLJ10706  | 0.28 |
| NM_031416 | C18ORF2   | 0.28 | NM_024327    | ZNF576    | 0.28 |
| NM_024815 | FLJ22494  | 0.28 | NM_025149    | FLJ20920  | 0.28 |
| NM_025208 | PDGFD     | 0.28 | NM_031293    | PMFBP1    | 0.28 |
| NM_031948 | MPN       | 0.28 | NM_032178    | FLJ13291  | 0.28 |
| NM_031451 | MGC4766   | 0.28 | XM_376171    | KIAA1843  | 0.28 |
| NM_133491 | SAT2      | 0.28 | NM_052998    | ODC-P     | 0.28 |
| NM_139159 | DPP9      | 0.28 | NM_138455    | CTHRC1    | 0.28 |
| NM_017731 | OSBPL7    | 0.28 | NM_052965    | C1ORF19   | 0.28 |
| NM_153708 | MGC35450  | 0.28 | XM_059832    | LOC136288 | 0.28 |
| NM_152371 | MGC26818  | 0.28 | NM_145051    | MGC4734   | 0.28 |
| NM_194320 | ZNF169    | 0.28 | XM_379433    | LOC285735 | 0.28 |
| NM_176891 | IFNT1     | 0.28 | NM_203405    | LOC388818 | 0.28 |
| XM_370669 | LOC360030 | 0.28 | NM_199341    | LOC374920 | 0.28 |
| NM_207473 | FLJ41733  | 0.28 | NM_017949    | CUEDC1    | 0.28 |
| XM_098030 | LOC151261 | 0.28 | XM_292785    | LOC342865 | 0.28 |
| XM_209505 | LOC285188 | 0.28 | XM_291726    | LOC340843 | 0.28 |
| XM_377783 | LOC402117 | 0.28 | XM_376243    | LOC401072 | 0.28 |
| XM_373864 | LOC388684 | 0.28 | XM_379194    | LOC401068 | 0.28 |
| XM_379149 | LOC401025 | 0.28 | XM_379368    | LOC401215 | 0.28 |
| XM_373491 | LOC387756 | 0.28 | XM_370856    | LOC388116 | 0.28 |
| XM_370968 | LOC388248 | 0.28 | NM_212559    | XKRX      | 0.28 |



|           |           |      |              |                |      |
|-----------|-----------|------|--------------|----------------|------|
| NM_153335 | LYK5      | 0.29 | NM_001369    | DNAH5          | 0.29 |
| NM_003663 | CGGBP1    | 0.29 | NM_017523    | HSXIAPAF1      | 0.29 |
| NM_002859 | PXN       | 0.29 | NM_018932    | PCDHB12        | 0.29 |
| NM_000552 | VWF       | 0.29 | NM_003931    | WASF1          | 0.29 |
| NM_012197 | RABGAP1   | 0.29 | NM_015713    | RRM2B          | 0.29 |
| NM_021959 | PPP1R11   | 0.29 | NM_003588    | CUL4B          | 0.29 |
| NM_001524 | HCRT      | 0.29 | NM_002387    | MCC            | 0.29 |
| NM_052962 | IL22RA2   | 0.29 | NM_001720    | BMP8B          | 0.29 |
| NM_001767 | CD2       | 0.29 | NM_002632    | PGF            | 0.29 |
| NM_014071 | NCOA6     | 0.29 | NM_005602    | CLDN11         | 0.29 |
| NM_001885 | CRYAB     | 0.29 | NM_001445    | FABP6          | 0.29 |
| NM_006890 | CEACAM7   | 0.29 | NM_000750    | CHRNB4         | 0.29 |
| NM_006835 | CCNI      | 0.29 | S73205       | INSAF          | 0.29 |
| NM_014287 | PM5       | 0.29 | NM_005807    | PRG4           | 0.29 |
| NM_002819 | PTBP1     | 0.29 | NM_000773    | CYP2E1         | 0.29 |
| NM_001357 | DHX9      | 0.29 | NM_000950    | PRRG1          | 0.29 |
| NM_000951 | PRRG2     | 0.29 | NM_006937    | SUMO2          | 0.29 |
| NM_005102 | FEZ2      | 0.29 | XM_290506    | SF3B2          | 0.29 |
| NM_006441 | MTHFS     | 0.29 | NM_016081    | KIAA0992       | 0.29 |
| NM_014902 | DLGAP4    | 0.29 | XM_037759    | KIAA0376       | 0.29 |
| NM_014302 | SEC61G    | 0.29 | NM_018958    | C15ORF2        | 0.29 |
| NM_015597 | GPSM1     | 0.29 | NM_014364    | GAPDS          | 0.29 |
| NM_182476 | COQ6      | 0.29 | NM_015879    | SIAT8C         | 0.29 |
| NM_015913 | TLP19     | 0.29 | NM_021247    | PRM3           | 0.29 |
| NM_021827 | FLJ23514  | 0.29 | NM_024791    | PDZK2          | 0.29 |
| NM_025268 | MGC4659   | 0.29 | NM_032167    | FLJ12363       | 0.29 |
| NM_031471 | URP2      | 0.29 | NM_032125    | DKFZP564D0478  | 0.29 |
| NM_032507 | PGBD1     | 0.29 | NM_152289    | ZNF561         | 0.29 |
| NM_153213 | ARHGEF19  | 0.29 | NM_182499    | DKFZP434M202   | 0.29 |
| NM_144620 | MGC14816  | 0.29 | NM_144965    | TTC16          | 0.29 |
| NM_173578 | FLJ90834  | 0.29 | XM_173166    | C6ORF191       | 0.29 |
| XM_378379 | LOC283432 | 0.29 | NM_173658    | FLJ36870       | 0.29 |
| XM_208766 | KIAA0284  | 0.29 | NM_178565    | MGC35555       | 0.29 |
| NM_182705 | MGC45871  | 0.29 | XM_370615    | DKFZP686O24166 | 0.29 |
| NM_198527 | MGC45386  | 0.29 | NM_003534    | HIST1H3G       | 0.29 |
| XM_293687 | LOC345079 | 0.29 | XM_375841    | LOC400804      | 0.29 |
| XM_373815 | LOC388573 | 0.29 | XM_374001    | LOC389019      | 0.29 |
| XM_374414 | LOC392647 | 0.29 | XM_374763    | LOC393076      | 0.29 |
| XM_371092 | LOC388440 | 0.29 | XM_373769    | LOC388453      | 0.29 |
| XM_370917 | LOC388189 | 0.29 | NM_001004333 | MGC71993       | 0.29 |
| XM_374317 | LOC389831 | 0.29 | NM_001005494 | OR6C4          | 0.29 |
| XM_380021 | LOC402677 | 0.29 | NM_005713    | COL4A3BP       | 0.3  |
| NM_001895 | CSNK2A1   | 0.3  | NM_002752    | MAPK9          | 0.3  |
| NM_001466 | FZD2      | 0.3  | NM_003381    | VIP            | 0.3  |
| NM_032594 | INSM2     | 0.3  | NM_002956    | RSN            | 0.3  |
| NM_002051 | GATA3     | 0.3  | NM_007146    | ZNF161         | 0.3  |

|           |                |      |              |           |      |
|-----------|----------------|------|--------------|-----------|------|
| NM_000284 | PDHA1          | 0.3  | NM_006002    | UCHL3     | 0.3  |
| NM_003481 | USP5           | 0.3  | NM_001338    | CXADR     | 0.3  |
| NM_000271 | NPC1           | 0.3  | NM_001560    | IL13RA1   | 0.3  |
| NM_002124 | HLA-DRB1       | 0.3  | NM_000877    | IL1R1     | 0.3  |
| NM_000514 | GDNF           | 0.3  | NM_001904    | CTNNA1    | 0.3  |
| NM_002379 | MATN1          | 0.3  | NM_000482    | APOA4     | 0.3  |
| NM_014058 | DESC1          | 0.3  | NM_000853    | GSTT1     | 0.3  |
| XM_371146 | KIAA1683       | 0.3  | NM_022566    | MESDC1    | 0.3  |
| NM_017779 | DEPDC1         | 0.3  | NM_001906    | CTRB1     | 0.3  |
| NM_018658 | KCNJ16         | 0.3  | NM_006936    | SUMO3     | 0.3  |
| XM_376172 | ZNF142         | 0.3  | NM_005869    | SDCCAG10  | 0.3  |
| NM_006346 | C13ORF24       | 0.3  | NM_015179    | KIAA0690  | 0.3  |
| NM_014332 | SMPX           | 0.3  | NM_012155    | EML2      | 0.3  |
| NM_015920 | RPS27L         | 0.3  | NM_016257    | HPCAL4    | 0.3  |
| NM_019079 | FLJ10884       | 0.3  | XM_048774    | FBXO42    | 0.3  |
| NM_199043 | C14ORF102      | 0.3  | NM_020882    | KIAA1510  | 0.3  |
| NM_024665 | IRA1           | 0.3  | NM_024891    | FLJ11783  | 0.3  |
| NM_030941 | LOC81691       | 0.3  | NM_032326    | MGC4618   | 0.3  |
| NM_153751 | C21ORF82       | 0.3  | NM_145166    | KIAA1190  | 0.3  |
| NM_033194 | HSPB9          | 0.3  | NM_178467    | HMG4L     | 0.3  |
| NM_153218 | FLJ38725       | 0.3  | XM_088567    | ZNF483    | 0.3  |
| NM_153229 | FLJ33318       | 0.3  | XM_173087    | LOC255798 | 0.3  |
| NM_198849 | LOC283514      | 0.3  | XM_291741    | DUPD1     | 0.3  |
| XM_371777 | LOC348938      | 0.3  | XM_208097    | LOC283523 | 0.3  |
| NM_207495 | DKFZP686I15217 | 0.3  | XM_293596    | LOC344797 | 0.3  |
| XM_087200 | LOC151443      | 0.3  | XM_294568    | LOC340501 | 0.3  |
| XM_293293 | LOC347359      | 0.3  | XM_066457    | LOC139067 | 0.3  |
| XM_371701 | LOC389217      | 0.3  | XM_373456    | LOC387662 | 0.3  |
| XM_378535 | LOC400411      | 0.3  | XM_372677    | LOC390805 | 0.3  |
| XM_373685 | LOC388276      | 0.3  | NM_001002921 | AK3L2     | 0.3  |
| NM_033550 | TP53RK         | 0.31 | NM_012248    | SEPHS2    | 0.31 |
| NM_000908 | NPR3           | 0.31 | NM_000959    | PTGFR     | 0.31 |
| NM_000130 | F5             | 0.31 | NM_031918    | KLF16     | 0.31 |
| NM_001426 | EN1            | 0.31 | NM_138691    | TMC1      | 0.31 |
| NM_001397 | ECE1           | 0.31 | NM_006983    | MMP23B    | 0.31 |
| NM_002222 | ITPR1          | 0.31 | NM_000879    | IL5       | 0.31 |
| NM_000416 | IFNGR1         | 0.31 | NM_003376    | VEGF      | 0.31 |
| NM_002001 | FCER1A         | 0.31 | NM_000815    | GABRD     | 0.31 |
| NM_001456 | FLNA           | 0.31 | NM_005119    | THRAP3    | 0.31 |
| NM_004925 | AQP3           | 0.31 | NM_005562    | LAMC2     | 0.31 |
| NM_003982 | SLC7A7         | 0.31 | NM_005841    | SPRY1     | 0.31 |
| NM_002102 | GYPE           | 0.31 | XM_290540    | MUC6      | 0.31 |
| XM_050041 | MYO1D          | 0.31 | NM_015999    | ADIPOR1   | 0.31 |
| NM_005072 | SLC12A4        | 0.31 | NM_004735    | LRRFIP1   | 0.31 |
| NM_003414 | ZNF267         | 0.31 | NM_006073    | TRDN      | 0.31 |
| NM_013390 | TMEM2          | 0.31 | NM_014400    | C4.4A     | 0.31 |

|           |               |      |              |              |      |
|-----------|---------------|------|--------------|--------------|------|
| NM_014354 | C6ORF54       | 0.31 | NM_016094    | COMMD2       | 0.31 |
| NM_017897 | FLJ20604      | 0.31 | NM_018271    | FLJ10916     | 0.31 |
| NM_018380 | DDX28         | 0.31 | NM_020151    | STARD7       | 0.31 |
| NM_018924 | PCDHGB3       | 0.31 | NM_022915    | MRPL44       | 0.31 |
| NM_022778 | DKFZP434L0117 | 0.31 | NM_022488    | APG3         | 0.31 |
| NM_030625 | CXXC6         | 0.31 | NM_030801    | MAGED4       | 0.31 |
| NM_032152 | PRAM-1        | 0.31 | NM_078473    | BLP1         | 0.31 |
| NM_030933 | C1ORF14       | 0.31 | NM_032607    | CREB3L3      | 0.31 |
| NM_032721 | TA-NFKBH      | 0.31 | XM_291202    | ZNF479       | 0.31 |
| NM_033210 | ZNF502        | 0.31 | NM_173474    | NTAN1        | 0.31 |
| NM_152344 | FLJ30656      | 0.31 | XM_061055    | C10ORF90     | 0.31 |
| NM_152448 | MGC33951      | 0.31 | NM_152489    | MGC35130     | 0.31 |
| XM_379554 | LOC157273     | 0.31 | NM_001001342 | BLOC1S2      | 0.31 |
| NM_152565 | ATP6V0D2      | 0.31 | NM_181719    | LOC255104    | 0.31 |
| NM_173805 | FLJ38723      | 0.31 | NM_178438    | LCE5A        | 0.31 |
| NM_173652 | MGC34824      | 0.31 | NM_181537    | KRT25C       | 0.31 |
| NM_198547 | FLJ46354      | 0.31 | NM_206832    | UNQ9372      | 0.31 |
| NM_198537 | FLJ44968      | 0.31 | XM_114067    | RP13-15M17.2 | 0.31 |
| XM_172889 | LOC256176     | 0.31 | XM_371299    | LOC388681    | 0.31 |
| XM_374124 | LOC389300     | 0.31 | XM_379485    | LOC401328    | 0.31 |
| XM_375090 | LOC400224     | 0.31 | XM_375955    | LOC400888    | 0.31 |
| NM_004614 | TK2           | 0.32 | NM_006572    | GNA13        | 0.32 |
| NM_181744 | OPN5          | 0.32 | NM_014373    | GPR160       | 0.32 |
| NM_006093 | PRG3          | 0.32 | NM_012278    | ITGB1BP2     | 0.32 |
| NM_006142 | SFN           | 0.32 | NM_002134    | HMOX2        | 0.32 |
| NM_014255 | TMEM4         | 0.32 | NM_002592    | PCNA         | 0.32 |
| NM_000275 | OCA2          | 0.32 | NM_020638    | FGF23        | 0.32 |
| NM_001711 | BGN           | 0.32 | NM_005165    | ALDOC        | 0.32 |
| NM_000014 | A2M           | 0.32 | NM_003041    | SLC5A2       | 0.32 |
| NM_002214 | ITGB8         | 0.32 | NM_022782    | MPHOSPH9     | 0.32 |
| NM_000540 | RYR1          | 0.32 | NM_006868    | RAB31        | 0.32 |
| NM_000567 | CRP           | 0.32 | NM_005325    | HIST1H1A     | 0.32 |
| NM_002457 | MUC2          | 0.32 | NM_002346    | LY6E         | 0.32 |
| NM_021130 | PPIA          | 0.32 | NM_005004    | NDUFB8       | 0.32 |
| NM_002781 | PSG5          | 0.32 | NM_003434    | ZNF133       | 0.32 |
| NM_013256 | ZNF180        | 0.32 | NM_003783    | B3GALT2      | 0.32 |
| NM_004709 | CXORF1        | 0.32 | NM_018344    | SLC29A3      | 0.32 |
| NM_031280 | MRPS15        | 0.32 | NM_024081    | TMG4         | 0.32 |
| NM_024556 | FLJ21103      | 0.32 | NM_030923    | DKFZP566N034 | 0.32 |
| NM_032112 | MRPL43        | 0.32 | NM_032528    | ST6GALII     | 0.32 |
| NM_207307 | LOC90288      | 0.32 | NM_020443    | NAV1         | 0.32 |
| NM_033114 | MADP-1        | 0.32 | XM_379540    | LOC157693    | 0.32 |
| NM_138706 | IMAGE:4907098 | 0.32 | NM_182531    | FLJ31875     | 0.32 |
| XM_379396 | LOC221710     | 0.32 | NM_207339    | MGC62094     | 0.32 |
| NM_173821 | FLJ33590      | 0.32 | XM_375527    | LOC339290    | 0.32 |
| NM_201550 | LRRC10        | 0.32 | NM_198404    | KCTD4        | 0.32 |

|              |             |      |              |               |      |
|--------------|-------------|------|--------------|---------------|------|
| XM_086001    | LOC148003   | 0.32 | XM_116384    | LOC202201     | 0.32 |
| XM_371280    | LOC388662   | 0.32 | XM_290501    | LOC338661     | 0.32 |
| XM_353628    | LOC378125   | 0.32 | XM_293387    | LOC340578     | 0.32 |
| XM_376575    | LOC401307   | 0.32 | XM_378064    | LOC402367     | 0.32 |
| XM_372589    | LOC390637   | 0.32 | NM_004448    | ERBB2         | 0.33 |
| NM_020547    | AMHR2       | 0.33 | NM_013392    | NRBP          | 0.33 |
| NM_178170    | NEK8        | 0.33 | NM_003965    | CCRL2         | 0.33 |
| NM_031414    | STK31       | 0.33 | NM_002511    | NMBR          | 0.33 |
| NM_001350    | DAXX        | 0.33 | NM_005537    | ING1          | 0.33 |
| NM_002487    | NDN         | 0.33 | NM_005933    | MLL           | 0.33 |
| NM_006099    | PIAS3       | 0.33 | NM_006746    | SCML1         | 0.33 |
| NM_007120    | UGT1A4      | 0.33 | NM_001093    | ACACB         | 0.33 |
| XM_376201    | EDEM1       | 0.33 | NM_004999    | MYO6          | 0.33 |
| NM_014241    | PTPLA       | 0.33 | NM_178570    | RTN4RL2       | 0.33 |
| NM_005478    | INSL5       | 0.33 | NM_001924    | GADD45A       | 0.33 |
| NM_001659    | ARF3        | 0.33 | NM_006589    | C1ORF2        | 0.33 |
| NM_001002905 | OR8G1P      | 0.33 | NM_003627    | SLC43A1       | 0.33 |
| NM_001712    | CEACAM1     | 0.33 | NM_005553    | KRN1          | 0.33 |
| NM_000991    | RPL28       | 0.33 | NM_032375    | AKT1S1        | 0.33 |
| NM_152701    | ABCA13      | 0.33 | NM_002934    | RNASE2        | 0.33 |
| NM_030757    | MKRN4       | 0.33 | NM_003901    | SGPL1         | 0.33 |
| NM_006844    | ILVBL       | 0.33 | NM_007221    | PMF1          | 0.33 |
| NM_007241    | EAP30       | 0.33 | NM_015122    | FCHO1         | 0.33 |
| NM_015084    | MRPS27      | 0.33 | XM_048457    | KIAA0892      | 0.33 |
| NM_012094    | PRDX5       | 0.33 | XM_027236    | TTC9          | 0.33 |
| NM_016078    | FAM18B      | 0.33 | NM_017880    | FLJ20558      | 0.33 |
| NM_017906    | PAK1IP1     | 0.33 | NM_017935    | BANK1         | 0.33 |
| NM_017564    | STAB2       | 0.33 | NM_018897    | DNAH7         | 0.33 |
| NM_021221    | LY6G5B      | 0.33 | NM_020707    | KIAA1173      | 0.33 |
| NM_025107    | MYCT1       | 0.33 | NM_030974    | DKFZP434N1923 | 0.33 |
| NM_032601    | MCEE        | 0.33 | NM_152409    | FLJ37562      | 0.33 |
| NM_172365    | C14ORF50    | 0.33 | NM_152486    | MGC45873      | 0.33 |
| NM_153359    | MGC24975    | 0.33 | NM_152655    | ZNF585A       | 0.33 |
| NM_152698    | FLJ38377    | 0.33 | NM_181611    | KRTAP19-5     | 0.33 |
| XM_291725    | SIAT8F      | 0.33 | NM_173691    | C9ORF75       | 0.33 |
| NM_181337    | KAAG1       | 0.33 | NM_198697    | KRTAP12-3     | 0.33 |
| XM_018432    | LOC146110   | 0.33 | XM_067228    | LOC131149     | 0.33 |
| XM_168585    | LOC219612   | 0.33 | XM_295178    | LOC340171     | 0.33 |
| XM_374711    | LOC392621   | 0.33 | XM_380100    | LOC402480     | 0.33 |
| NM_001012267 | RP11-19J3.3 | 0.33 | XM_372109    | LOC389749     | 0.33 |
| XM_372425    | LOC390234   | 0.33 | XM_378362    | LOC400046     | 0.33 |
| XM_373786    | LOC388489   | 0.33 | NM_001005284 | OR9G4         | 0.33 |
| NM_032430    | KIAA1811    | 0.34 | NM_145245    | LOC115704     | 0.34 |
| NM_138995    | MYO3B       | 0.34 | NM_007065    | CDC37         | 0.34 |
| NM_006453    | TBL3        | 0.34 | NM_004629    | FANCG         | 0.34 |
| NM_005848    | IRLB        | 0.34 | NM_003624    | RANBP3        | 0.34 |

|              |               |      |           |           |      |
|--------------|---------------|------|-----------|-----------|------|
| NM_000235    | LIPA          | 0.34 | NM_006332 | IFI30     | 0.34 |
| NM_020469    | ABO           | 0.34 | NM_000789 | ACE       | 0.34 |
| NM_181672    | OGT           | 0.34 | NM_052963 | TOP1MT    | 0.34 |
| NM_000797    | DRD4          | 0.34 | NM_004512 | IL11RA    | 0.34 |
| NM_003824    | FADD          | 0.34 | NM_030877 | CTNBL1    | 0.34 |
| XM_370702    | FGD6          | 0.34 | NM_000184 | HBG2      | 0.34 |
| NM_005022    | PFN1          | 0.34 | NM_014290 | TDRD7     | 0.34 |
| NM_004067    | CHN2          | 0.34 | NM_001117 | ADCYAP1   | 0.34 |
| NM_002258    | KLRB1         | 0.34 | NM_002289 | LALBA     | 0.34 |
| NM_022899    | ACTR8         | 0.34 | NM_152263 | TPM3      | 0.34 |
| NM_003529    | HIST1H3A      | 0.34 | NM_053274 | GLMN      | 0.34 |
| XM_290667    | KIAA0350      | 0.34 | NM_015173 | TBC1D1    | 0.34 |
| NM_012336    | NARF          | 0.34 | NM_014472 | C10ORF28  | 0.34 |
| NM_016060    | CGI-125       | 0.34 | NM_016641 | MIR16     | 0.34 |
| NM_017535    | DKFZP566H0824 | 0.34 | NM_017576 | KIF27     | 0.34 |
| NM_018367    | PHCA          | 0.34 | NM_018683 | ZNF313    | 0.34 |
| NM_024104    | MGC2747       | 0.34 | NM_024642 | GALNT12   | 0.34 |
| NM_024685    | FLJ23560      | 0.34 | NM_025027 | ZNF606    | 0.34 |
| XM_378655    | LOC96597      | 0.34 | NM_152275 | FLJ13946  | 0.34 |
| NM_138962    | MSI2          | 0.34 | NM_138403 | MYLC2PL   | 0.34 |
| XM_059972    | C9ORF115      | 0.34 | NM_080877 | SLC34A3   | 0.34 |
| NM_177966    | DKFZP667B1218 | 0.34 | NM_181715 | TORC2     | 0.34 |
| NM_152990    | PXT1          | 0.34 | NM_152755 | MGC40499  | 0.34 |
| XM_379373    | LOC257358     | 0.34 | NM_182575 | MGC34799  | 0.34 |
| NM_207103    | UNQ5783       | 0.34 | NM_194270 | MOPT      | 0.34 |
| XM_211079    | LOC283530     | 0.34 | NM_206895 | UNQ830    | 0.34 |
| XM_290558    | LOC338761     | 0.34 | XM_069612 | LOC135935 | 0.34 |
| XM_378917    | LOC400796     | 0.34 | XM_372805 | LOC391137 | 0.34 |
| XM_377849    | LOC402188     | 0.34 | XM_370584 | LOC387720 | 0.34 |
| NM_001004352 | FLJ16323      | 0.34 | XM_379894 | LOC402569 | 0.34 |
| NM_004075    | CRY1          | 0.35 | NM_023940 | RASL11B   | 0.35 |
| NM_016154    | RAB4B         | 0.35 | NM_002052 | GATA4     | 0.35 |
| NM_001485    | GBX2          | 0.35 | NM_018951 | HOXA10    | 0.35 |
| NM_018664    | SNFT          | 0.35 | NM_004000 | CHI3L2    | 0.35 |
| NM_003422    | ZNF42         | 0.35 | NM_001182 | ALDH7A1   | 0.35 |
| NM_016489    | NT5C3         | 0.35 | NM_014273 | ADAMTS6   | 0.35 |
| NM_016585    | THEG          | 0.35 | NM_000754 | COMT      | 0.35 |
| NM_006477    | RRP22         | 0.35 | NM_007110 | TEP1      | 0.35 |
| NM_005603    | ATP8B1        | 0.35 | NM_021131 | PPP2R4    | 0.35 |
| NM_006654    | FRS2          | 0.35 | NM_005894 | CD5L      | 0.35 |
| NM_002707    | PPM1G         | 0.35 | NM_004962 | GDF10     | 0.35 |
| NM_002527    | NTF3          | 0.35 | NM_001962 | EFNA5     | 0.35 |
| NM_000227    | LAMA3         | 0.35 | NM_001753 | CAV1      | 0.35 |
| NM_001297    | CNGB1         | 0.35 | NM_006950 | SYN1      | 0.35 |
| NM_006595    | API5          | 0.35 | NM_003903 | CDC16     | 0.35 |
| NM_176811    | NALP8         | 0.35 | NM_002895 | RBL1      | 0.35 |

|              |            |      |           |           |      |
|--------------|------------|------|-----------|-----------|------|
| NM_014210    | EVI2A      | 0.35 | NM_001449 | FHL1      | 0.35 |
| NM_033063    | MAP6       | 0.35 | NM_005929 | MF12      | 0.35 |
| NM_020772    | 182-FIP    | 0.35 | NM_003042 | SLC6A1    | 0.35 |
| NM_004598    | SPOCK      | 0.35 | NM_021648 | TSPYL4    | 0.35 |
| NM_017575    | C17ORF31   | 0.35 | XM_032278 | SIPA1L3   | 0.35 |
| XM_045421    | C20ORF194  | 0.35 | NM_016539 | SIRT6     | 0.35 |
| NM_019042    | FLJ20485   | 0.35 | NM_017646 | TRIT1     | 0.35 |
| NM_017908    | FLJ20626   | 0.35 | NM_020651 | PELI1     | 0.35 |
| NM_022091    | DJ467N11.1 | 0.35 | NM_022141 | PARVG     | 0.35 |
| NM_024060    | MGC5395    | 0.35 | NM_024592 | FLJ13352  | 0.35 |
| NM_024074    | MGC3169    | 0.35 | NM_024766 | FLJ23451  | 0.35 |
| NM_024701    | ASB13      | 0.35 | NM_025262 | LY6G5C    | 0.35 |
| NM_025087    | FLJ21511   | 0.35 | NM_030794 | TDRD3     | 0.35 |
| NM_032153    | ZIC4       | 0.35 | NM_032825 | ZNF382    | 0.35 |
| NM_032846    | RAB2B      | 0.35 | NM_138961 | ESAM      | 0.35 |
| NM_052855    | MGC15396   | 0.35 | NM_144689 | FLJ32191  | 0.35 |
| NM_174908    | C3ORF6     | 0.35 | XM_371586 | FLJ25415  | 0.35 |
| NM_173556    | MGC34732   | 0.35 | NM_198463 | FLJ42117  | 0.35 |
| NM_175895    | FLJ25590   | 0.35 | XM_379477 | LOC285941 | 0.35 |
| XM_290985    | LOC339692  | 0.35 | NM_003349 | KUA-UEV   | 0.35 |
| XM_291161    | LOC340168  | 0.35 | XM_375667 | LOC400723 | 0.35 |
| XM_375869    | LOC400818  | 0.35 | XM_373075 | LOC391763 | 0.35 |
| XM_371769    | LOC389321  | 0.35 | XM_379629 | LOC401500 | 0.35 |
| XM_372142    | LOC389791  | 0.35 | XM_377028 | LOC401606 | 0.35 |
| NM_001001873 | LOC283174  | 0.35 | XM_371455 | LOC388882 | 0.35 |
| NM_001982    | ERBB3      | 0.36 | NM_002045 | GAP43     | 0.36 |
| NM_003010    | MAP2K4     | 0.36 | NM_006510 | RFP       | 0.36 |
| NM_003952    | RPS6KB2    | 0.36 | NM_175067 | TRAR4     | 0.36 |
| NM_001779    | CD58       | 0.36 | NM_004081 | DAZ       | 0.36 |
| NM_002484    | NUBP1      | 0.36 | NM_006548 | IMP-2     | 0.36 |
| NM_004180    | TANK       | 0.36 | NM_002801 | PSMB10    | 0.36 |
| NM_007233    | TP53AP1    | 0.36 | NM_003344 | UBE2H     | 0.36 |
| NM_017946    | FKBP14     | 0.36 | NM_012176 | FBXO4     | 0.36 |
| NM_004167    | CCL15      | 0.36 | NM_000887 | ITGAX     | 0.36 |
| NM_000756    | CRH        | 0.36 | NM_020183 | ARNTL2    | 0.36 |
| NM_000700    | ANXA1      | 0.36 | NM_004811 | LPXN      | 0.36 |
| NM_004969    | IDE        | 0.36 | NM_002482 | NASP      | 0.36 |
| NM_005032    | PLS3       | 0.36 | NM_173703 | MTATP8    | 0.36 |
| NM_006923    | SDF2       | 0.36 | NM_003004 | SECTM1    | 0.36 |
| NM_004803    | SLC22A14   | 0.36 | NM_003819 | PABPC4    | 0.36 |
| NM_014858    | HUCEP11    | 0.36 | NM_006363 | SEC23B    | 0.36 |
| NM_015106    | SRISNF2L   | 0.36 | XM_049037 | TNRC9     | 0.36 |
| NM_016626    | RKHD2      | 0.36 | NM_017870 | HSPA5BP1  | 0.36 |
| NM_021233    | DLAD       | 0.36 | NM_021248 | CDH22     | 0.36 |
| NM_024710    | FLJ23469   | 0.36 | NM_024293 | C2ORF17   | 0.36 |
| NM_032886    | MGC15912   | 0.36 | NM_052926 | PNMA5     | 0.36 |

|              |           |      |              |              |      |
|--------------|-----------|------|--------------|--------------|------|
| NM_144590    | ANKRD22   | 0.36 | NM_152447    | LRFN5        | 0.36 |
| NM_145274    | MGC21518  | 0.36 | XM_372592    | LOC145814    | 0.36 |
| NM_138703    | MAGEE2    | 0.36 | NM_198401    | LOC157567    | 0.36 |
| XM_371849    | C6ORF198  | 0.36 | NM_181783    | SMILE        | 0.36 |
| NM_182546    | MGC33530  | 0.36 | NM_198215    | FAM13C1      | 0.36 |
| XM_378912    | LOC284688 | 0.36 | NM_178554    | FLJ33207     | 0.36 |
| NM_203304    | RKHD1     | 0.36 | NM_206923    | YY2          | 0.36 |
| XM_292700    | LOC342808 | 0.36 | XM_293984    | LOC345829    | 0.36 |
| XM_378009    | LOC402326 | 0.36 | XM_372616    | LOC390688    | 0.36 |
| NM_005308    | GRK5      | 0.37 | NM_020988    | GNAO1        | 0.37 |
| NM_015236    | LPHN3     | 0.37 | NM_001769    | CD9          | 0.37 |
| NM_173631    | ZNF547    | 0.37 | NM_006912    | RIT1         | 0.37 |
| NM_015394    | ZNF10     | 0.37 | NM_021572    | ENPP5        | 0.37 |
| NM_015907    | LAP3      | 0.37 | NM_012250    | RRAS2        | 0.37 |
| NM_003482    | MLL2      | 0.37 | NM_022822    | KLC2         | 0.37 |
| NM_002117    | HLA-C     | 0.37 | NM_002941    | ROBO1        | 0.37 |
| NM_023004    | RTN4R     | 0.37 | NM_024025    | MGC1136      | 0.37 |
| NM_005137    | DGCR2     | 0.37 | NM_004406    | DMBT1        | 0.37 |
| NM_003123    | SPN       | 0.37 | NM_021101    | CLDN1        | 0.37 |
| NM_022121    | PERP      | 0.37 | NM_170753    | PGBD3        | 0.37 |
| NM_014139    | SCN11A    | 0.37 | NM_014781    | RB1CC1       | 0.37 |
| NM_001324    | CSTF1     | 0.37 | NM_003817    | ADAM7        | 0.37 |
| XM_377962    | PMS2L1    | 0.37 | NM_004159    | PSMB8        | 0.37 |
| NM_004596    | SNRPA     | 0.37 | NM_003203    | C2ORF3       | 0.37 |
| NM_006862    | TDRKH     | 0.37 | NM_015426    | DKFZP434C245 | 0.37 |
| NM_014469    | HNRNPG-T  | 0.37 | NM_017573    | PCSK4        | 0.37 |
| NM_018132    | C6ORF139  | 0.37 | NM_018099    | MLSTD1       | 0.37 |
| NM_021181    | SLAMF7    | 0.37 | NM_023011    | UPF3A        | 0.37 |
| NM_024508    | ZBED2     | 0.37 | NM_024833    | FLJ23506     | 0.37 |
| NM_024949    | BOMB      | 0.37 | NM_032128    | DKFZP566M114 | 0.37 |
| NM_032485    | MCM8      | 0.37 | NM_032762    | MGC16121     | 0.37 |
| NM_138352    | LOC90378  | 0.37 | NM_138437    | GASP2        | 0.37 |
| NM_182522    | TAFA4     | 0.37 | NM_178821    | FLJ25955     | 0.37 |
| NM_153238    | MGC22001  | 0.37 | XM_168060    | C6ORF154     | 0.37 |
| NM_173853    | KRTCAP3   | 0.37 | NM_175904    | FLJ40121     | 0.37 |
| XM_209902    | ZNF252    | 0.37 | NM_178547    | ARCH         | 0.37 |
| NM_207448    | FLJ45256  | 0.37 | XM_036942    | LOC150221    | 0.37 |
| XM_376423    | LOC401207 | 0.37 | XM_377883    | LOC402206    | 0.37 |
| XM_375302    | LOC400499 | 0.37 | NM_001001791 | C10ORF55     | 0.37 |
| NM_001004124 | OR4P4     | 0.37 | NM_004963    | GUCY2C       | 0.38 |
| NM_016616    | TXNDC3    | 0.38 | NM_007271    | STK38        | 0.38 |
| NM_021205    | RHOA      | 0.38 | NM_000243    | MEFV         | 0.38 |
| NM_005016    | PCBP2     | 0.38 | NM_000548    | TSC2         | 0.38 |
| NM_005636    | SSX4      | 0.38 | NM_005375    | MYB          | 0.38 |
| NM_033502    | TRERF1    | 0.38 | NM_001868    | CPA1         | 0.38 |
| NM_014324    | AMACR     | 0.38 | NM_138809    | LOC134147    | 0.38 |

|           |           |      |           |              |      |
|-----------|-----------|------|-----------|--------------|------|
| NM_005540 | INPP5B    | 0.38 | NM_003358 | UGCG         | 0.38 |
| NM_001176 | ARHGDIG   | 0.38 | NM_004827 | ABCG2        | 0.38 |
| NM_001993 | F3        | 0.38 | NM_004321 | KIF1A        | 0.38 |
| NM_024888 | FLJ11535  | 0.38 | NM_000081 | CHS1         | 0.38 |
| NM_178831 | GATS      | 0.38 | NM_003544 | HIST1H4B     | 0.38 |
| NM_005007 | NFKBIL1   | 0.38 | NM_002865 | RAB2         | 0.38 |
| NM_130463 | ATP6V1G2  | 0.38 | NM_006232 | POLR2H       | 0.38 |
| NM_013255 | MKLN1     | 0.38 | NM_005073 | SLC15A1      | 0.38 |
| NM_006289 | TLN1      | 0.38 | NM_014850 | SRGAP2       | 0.38 |
| NM_006336 | C9ORF60   | 0.38 | NM_006642 | SDCCAG8      | 0.38 |
| XM_351842 | SLC35D2   | 0.38 | NM_178424 | SOX30        | 0.38 |
| NM_006567 | FARS1     | 0.38 | NM_177424 | STX12        | 0.38 |
| NM_153681 | DSCR5     | 0.38 | NM_017432 | PTOV1        | 0.38 |
| XM_372879 | C21ORF57  | 0.38 | NM_016329 | SFMBT1       | 0.38 |
| NM_016532 | SKIP      | 0.38 | NM_020309 | SLC17A7      | 0.38 |
| NM_018916 | PCDHGA3   | 0.38 | XM_029429 | KIAA1328     | 0.38 |
| NM_030651 | C6ORF31   | 0.38 | NM_025214 | SE57-1       | 0.38 |
| NM_052831 | C6ORF192  | 0.38 | NM_152342 | CDYL2        | 0.38 |
| NM_153018 | FLJ30726  | 0.38 | NM_173848 | LOC138046    | 0.38 |
| NM_080875 | LOC142678 | 0.38 | NM_207335 | FLJ46299     | 0.38 |
| NM_152623 | FLJ37927  | 0.38 | NM_152582 | MGC27005     | 0.38 |
| XM_114430 | LOC202051 | 0.38 | NM_145003 | FLJ31164     | 0.38 |
| NM_207395 | FLJ45850  | 0.38 | XM_293104 | LOC343574    | 0.38 |
| XM_379235 | LOC401103 | 0.38 | XM_373520 | LOC387824    | 0.38 |
| XM_373531 | LOC387854 | 0.38 | XM_372410 | LOC390192    | 0.38 |
| NM_004563 | PCK2      | 0.39 | NM_017433 | MYO3A        | 0.39 |
| NM_000678 | ADRA1D    | 0.39 | NM_016276 | SGK2         | 0.39 |
| NM_000844 | GRM7      | 0.39 | NM_175057 | TRAR3        | 0.39 |
| NM_153604 | MYOCD     | 0.39 | NM_013232 | PDCD6        | 0.39 |
| NM_005825 | RASGRP2   | 0.39 | NM_000523 | HOXD13       | 0.39 |
| NM_003322 | TULP1     | 0.39 | NM_001464 | ADAM2        | 0.39 |
| NM_000072 | CD36      | 0.39 | NM_000074 | TNFSF5       | 0.39 |
| NM_002521 | NPPB      | 0.39 | NM_002235 | KCNA6        | 0.39 |
| NM_000620 | NOS1      | 0.39 | NM_007366 | PLA2R1       | 0.39 |
| NM_000311 | PRNP      | 0.39 | NM_002533 | NVL          | 0.39 |
| XM_029438 | RUTBC1    | 0.39 | NM_001073 | UGT2B11      | 0.39 |
| NM_030913 | SEMA6C    | 0.39 | NM_014994 | MAPKBP1      | 0.39 |
| NM_003419 | ZNF345    | 0.39 | NM_016192 | TMEFF2       | 0.39 |
| NM_015578 | C19ORF13  | 0.39 | XM_371074 | DKFZP564D166 | 0.39 |
| NM_016002 | CGI-49    | 0.39 | NM_018034 | FLJ10233     | 0.39 |
| NM_018502 | PRO1580   | 0.39 | NM_021191 | NEUROD4      | 0.39 |
| NM_024037 | MGC2603   | 0.39 | NM_022573 | TSPY2        | 0.39 |
| NM_024101 | MLPH      | 0.39 | NM_024641 | MANEA        | 0.39 |
| NM_025263 | PRR3      | 0.39 | NM_031926 | TTY7         | 0.39 |
| NM_032446 | MEGF10    | 0.39 | NM_032860 | C6ORF93      | 0.39 |
| NM_033514 | LIMS3     | 0.39 | NM_033412 | MCART1       | 0.39 |



|              |           |      |              |              |      |
|--------------|-----------|------|--------------|--------------|------|
| XM_117117    | FLJ13072  | 0.39 | NM_182497    | KA36         | 0.39 |
| XM_371468    | MGC40042  | 0.39 | NM_173355    | UPP2         | 0.39 |
| NM_145207    | SPATA5    | 0.39 | NM_173555    | TYSND1       | 0.39 |
| NM_153374    | MGC35274  | 0.39 | NM_173357    | SSX6         | 0.39 |
| NM_173624    | FLJ40504  | 0.39 | NM_173619    | MGC34761     | 0.39 |
| NM_205851    | FLJ35700  | 0.39 | NM_180990    | LGICZ        | 0.39 |
| NM_182631    | LOC348840 | 0.39 | NM_004142    | MMPL1        | 0.39 |
| XM_371277    | LOC388659 | 0.39 | XM_087901    | LOC154288    | 0.39 |
| XM_379380    | LOC401222 | 0.39 | XM_373097    | LOC391840    | 0.39 |
| NM_014867    | KIAA0711  | 0.39 | XM_375608    | LOC400692    | 0.39 |
| XM_290923    | KIAA1639  | 0.4  | NM_002609    | PDGFRB       | 0.4  |
| NM_015678    | NBEA      | 0.4  | NM_004041    | ARRB1        | 0.4  |
| NM_007040    | HNRPUL1   | 0.4  | NM_005702    | ERAL1        | 0.4  |
| NM_005324    | H3F3B     | 0.4  | NM_000179    | MSH6         | 0.4  |
| NM_006626    | ZNF482    | 0.4  | NM_000209    | IPF1         | 0.4  |
| NM_006354    | TADA3L    | 0.4  | NM_000663    | ABAT         | 0.4  |
| NM_015093    | MAP3K7IP2 | 0.4  | NM_000520    | HEXA         | 0.4  |
| NM_012249    | RHOQ      | 0.4  | NM_021652    | SMA4         | 0.4  |
| NM_003496    | TRRAP     | 0.4  | NM_002710    | PPP1CC       | 0.4  |
| NM_002688    | PNUTL1    | 0.4  | NM_004489    | GPS2         | 0.4  |
| NM_018659    | C17       | 0.4  | NM_000802    | FOLR1        | 0.4  |
| NM_005210    | CRYGB     | 0.4  | NM_000477    | ALB          | 0.4  |
| NM_020960    | GPR107    | 0.4  | NM_005332    | HBZ          | 0.4  |
| NM_148959    | HUS1B     | 0.4  | NM_001285    | CLCA1        | 0.4  |
| NM_006899    | IDH3B     | 0.4  | NM_001930    | DHPS         | 0.4  |
| NM_000824    | GLRB      | 0.4  | NM_021965    | PGM5         | 0.4  |
| NM_003451    | ZNF177    | 0.4  | NM_007208    | MRPL3        | 0.4  |
| NM_015397    | WDR40A    | 0.4  | XM_375171    | DKFZP434L187 | 0.4  |
| NM_014404    | CACNG5    | 0.4  | NM_016185    | HN1          | 0.4  |
| NM_058180    | C21ORF58  | 0.4  | NM_018404    | CENTA2       | 0.4  |
| NM_018059    | FLJ10324  | 0.4  | NM_018652    | GOLGA6       | 0.4  |
| NM_019893    | ASAH2     | 0.4  | NM_022483    | FLJ21657     | 0.4  |
| NM_024078    | MGC3162   | 0.4  | NM_024948    | C10ORF97     | 0.4  |
| NM_025225    | C22ORF20  | 0.4  | NM_030755    | TXNDC        | 0.4  |
| XM_378186    | MGC15634  | 0.4  | NM_152281    | FLJ11752     | 0.4  |
| NM_181599    | KRTAP13-1 | 0.4  | NM_152657    | GGN          | 0.4  |
| NM_153043    | FLJ37078  | 0.4  | XM_379322    | LOC340109    | 0.4  |
| NM_182894    | CHX10     | 0.4  | NM_198503    | SLICK        | 0.4  |
| NM_207507    | FLJ45202  | 0.4  | XM_210400    | LOC285031    | 0.4  |
| XM_372911    | LOC391343 | 0.4  | XM_371491    | LOC388946    | 0.4  |
| XM_379534    | LOC401437 | 0.4  | XM_370834    | LOC388077    | 0.4  |
| XM_373756    | LOC388429 | 0.4  | XM_373771    | LOC388456    | 0.4  |
| XM_373397    | LOC392584 | 0.4  | NM_001005470 | OR4B1        | 0.4  |
| NM_001005491 | OR10AG1   | 0.4  | NM_004246    | GLP2R        | 0.41 |
| NM_032503    | GPR145    | 0.41 | NM_004224    | GPR50        | 0.41 |
| NM_006176    | NRGN      | 0.41 | NM_000185    | SERPIND1     | 0.41 |

|           |           |      |              |           |      |
|-----------|-----------|------|--------------|-----------|------|
| NM_004688 | NMI       | 0.41 | NM_000755    | CRAT      | 0.41 |
| NM_003937 | KYNU      | 0.41 | NM_000487    | ARSA      | 0.41 |
| NM_031295 | WBSCR21   | 0.41 | NM_003929    | RAB7L1    | 0.41 |
| NM_003812 | ADAM23    | 0.41 | NM_025245    | PBX4      | 0.41 |
| NM_006156 | NEDD8     | 0.41 | NM_005744    | ARIH1     | 0.41 |
| NM_001144 | AMFR      | 0.41 | NM_005605    | PPP3CC    | 0.41 |
| NM_021956 | GRIK2     | 0.41 | NM_006522    | WNT6      | 0.41 |
| NM_014880 | DCL-1     | 0.41 | NM_006529    | GLRA3     | 0.41 |
| NM_001459 | FLT3LG    | 0.41 | NM_006085    | BPNT1     | 0.41 |
| NM_012317 | LDOC1     | 0.41 | NM_006898    | HOXD3     | 0.41 |
| NM_007042 | RPP14     | 0.41 | NM_175569    | XG        | 0.41 |
| NM_004046 | ATP5A1    | 0.41 | NM_014289    | CAPN6     | 0.41 |
| NM_004950 | DSPG3     | 0.41 | NM_033025    | 7H3       | 0.41 |
| NM_033631 | LUZP1     | 0.41 | XM_035863    | ZNF37A    | 0.41 |
| NM_003823 | TNFRSF6B  | 0.41 | NM_006402    | HBXIP     | 0.41 |
| NM_006680 | ME3       | 0.41 | NM_022375    | OCLM      | 0.41 |
| NM_006577 | B3GNT1    | 0.41 | XM_374829    | PDCD11    | 0.41 |
| XM_059482 | FLJ00133  | 0.41 | NM_015529    | MOXD1     | 0.41 |
| NM_015545 | PTCD1     | 0.41 | NM_012199    | EIF2C1    | 0.41 |
| NM_015700 | HIRIP5    | 0.41 | NM_016548    | GOLPH2    | 0.41 |
| NM_015921 | C6ORF82   | 0.41 | NM_017443    | POLE3     | 0.41 |
| NM_018050 | MANSC1    | 0.41 | NM_018163    | FLJ10634  | 0.41 |
| NM_018000 | FLJ10116  | 0.41 | NM_020147    | THAP10    | 0.41 |
| NM_020652 | ZNF286    | 0.41 | NM_021948    | BCAN      | 0.41 |
| NM_030783 | PTDSS2    | 0.41 | NM_033088    | FAM40A    | 0.41 |
| NM_052954 | CYYR1     | 0.41 | NM_052960    | RBP7      | 0.41 |
| NM_153033 | KCTD7     | 0.41 | NM_152497    | FLJ32206  | 0.41 |
| NM_176791 | C20ORF65  | 0.41 | NM_182527    | CABP7     | 0.41 |
| NM_145013 | MGC35558  | 0.41 | NM_012184    | FOXD4L1   | 0.41 |
| NM_175061 | JAZF1     | 0.41 | NM_153613    | LOC254531 | 0.41 |
| XM_211305 | LOC284021 | 0.41 | NM_182759    | TAFA3     | 0.41 |
| XM_290777 | LOC339231 | 0.41 | NM_175923    | MGC42630  | 0.41 |
| NM_181808 | POLN      | 0.41 | NM_198085    | RNF148    | 0.41 |
| XM_292850 | LOC343930 | 0.41 | XM_098008    | LOC151154 | 0.41 |
| XM_066443 | LOC139046 | 0.41 | XM_379527    | LOC401431 | 0.41 |
| XM_379827 | LOC402494 | 0.41 | XM_379986    | LOC402633 | 0.41 |
| XM_373233 | LOC392179 | 0.41 | XM_372471    | LOC390345 | 0.41 |
| XM_377259 | LOC401713 | 0.41 | NM_001004346 | MTHFD2L   | 0.41 |
| XM_374498 | LOC392758 | 0.41 | XM_374501    | LOC392762 | 0.41 |
| NM_002378 | MATK      | 0.42 | NM_003215    | TEC       | 0.42 |
| NM_014621 | HOXD4     | 0.42 | NM_014383    | TZFP      | 0.42 |
| NM_033285 | TP53INP1  | 0.42 | NM_002180    | IGHMBP2   | 0.42 |
| NM_002426 | MMP12     | 0.42 | NM_005038    | PPID      | 0.42 |
| NM_006001 | TUBA2     | 0.42 | NM_002615    | SERPINF1  | 0.42 |
| NM_007013 | WWP1      | 0.42 | NM_004287    | GOSR2     | 0.42 |
| NM_012181 | FKBP8     | 0.42 | NM_004576    | PPP2R2B   | 0.42 |

|              |           |      |              |                |      |
|--------------|-----------|------|--------------|----------------|------|
| NM_005448    | BMP15     | 0.42 | NM_000527    | LDLR           | 0.42 |
| NM_004112    | FGF11     | 0.42 | NM_015099    | CAMTA2         | 0.42 |
| NM_005190    | CCNC      | 0.42 | NM_153716    | HSFY2          | 0.42 |
| NM_004859    | CLTC      | 0.42 | NM_021963    | NAP1L2         | 0.42 |
| NM_001001503 | NDUFV3    | 0.42 | NM_003100    | SNX2           | 0.42 |
| NM_003512    | HIST1H2AC | 0.42 | NM_004298    | NUP155         | 0.42 |
| NM_148920    | PIGQ      | 0.42 | NM_021023    | FHR-3          | 0.42 |
| NM_013974    | DDAH2     | 0.42 | NM_015336    | HIP14          | 0.42 |
| NM_014311    | SMUG1     | 0.42 | NM_014337    | PPIL2          | 0.42 |
| NM_014067    | LRP16     | 0.42 | NM_014393    | STAU2          | 0.42 |
| NM_015717    | CD207     | 0.42 | NM_016220    | ZFD25          | 0.42 |
| NM_016249    | MAGEC2    | 0.42 | NM_018334    | LRRN3          | 0.42 |
| NM_018048    | FLJ10292  | 0.42 | NM_017841    | FLJ20487       | 0.42 |
| NM_017994    | FLJ10099  | 0.42 | NM_020237    | C8ORF17        | 0.42 |
| NM_020468    | SNX14     | 0.42 | NM_020120    | UGCGL1         | 0.42 |
| NM_020346    | SLC17A6   | 0.42 | NM_022374    | ARL6IP2        | 0.42 |
| NM_022482    | ZNF336    | 0.42 | NM_022829    | SLC13A3        | 0.42 |
| NM_022906    | FLJ13195  | 0.42 | NM_025143    | C21ORF96       | 0.42 |
| NM_030928    | CDT1      | 0.42 | NM_032287    | DKFZP761O17121 | 0.42 |
| NM_032873    | KIAA1959  | 0.42 | NM_033106    | GALP           | 0.42 |
| XM_378848    | LOC85028  | 0.42 | XM_087672    | KIAA1935       | 0.42 |
| XM_057107    | KIAA1937  | 0.42 | NM_138389    | LOC92689       | 0.42 |
| NM_152315    | MGC34290  | 0.42 | NM_174891    | C14ORF79       | 0.42 |
| NM_138790    | LOC122618 | 0.42 | NM_182500    | FLJ25143       | 0.42 |
| NM_138794    | LYPLAL1   | 0.42 | NM_173850    | SERPINA12      | 0.42 |
| NM_152451    | GUP1      | 0.42 | NM_182506    | FLJ32965       | 0.42 |
| NM_152431    | PIWIL4    | 0.42 | NM_138287    | BBAP           | 0.42 |
| NM_182528    | C1QL2     | 0.42 | NM_144979    | MGC27016       | 0.42 |
| XM_168055    | C6ORF185  | 0.42 | XM_378232    | LOC219690      | 0.42 |
| NM_152759    | MGC35140  | 0.42 | XM_373624    | LOC283697      | 0.42 |
| XM_209204    | MGC26694  | 0.42 | XM_379535    | LOC285889      | 0.42 |
| NM_198559    | MGC50811  | 0.42 | XM_062788    | LOC121792      | 0.42 |
| XM_211896    | LOC285435 | 0.42 | XM_065750    | LOC130500      | 0.42 |
| XM_117451    | LOC202775 | 0.42 | XM_377997    | LOC402318      | 0.42 |
| XM_370638    | LOC387790 | 0.42 | XM_372433    | LOC390259      | 0.42 |
| XM_373808    | LOC388549 | 0.42 | NM_001005486 | OR4K15         | 0.42 |
| NM_004336    | BUB1      | 0.43 | NM_000075    | CDK4           | 0.43 |
| NM_002253    | KDR       | 0.43 | NM_001079    | ZAP70          | 0.43 |
| NM_004949    | DSC2      | 0.43 | NM_020248    | CTNNBIP1       | 0.43 |
| NM_018682    | MLL5      | 0.43 | NM_002979    | SCP2           | 0.43 |
| NM_001310    | CREBL2    | 0.43 | NM_006856    | ATF7           | 0.43 |
| NM_005644    | TAF12     | 0.43 | NM_000378    | WT1            | 0.43 |
| NM_017444    | CHRAC1    | 0.43 | NM_007204    | DDX20          | 0.43 |
| NM_021988    | UBE2V1    | 0.43 | NM_012414    | RAB3-GAP150    | 0.43 |
| NM_004205    | USP2      | 0.43 | NM_002721    | PPP6C          | 0.43 |
| NM_003868    | FGF16     | 0.43 | NM_005202    | COL8A2         | 0.43 |

|              |             |      |              |           |      |
|--------------|-------------|------|--------------|-----------|------|
| NM_133497    | KCNV2       | 0.43 | NM_001807    | CEL       | 0.43 |
| NM_002287    | LAIR1       | 0.43 | NM_006452    | PAICS     | 0.43 |
| NM_001321    | CSRP2       | 0.43 | NM_001499    | GLE1L     | 0.43 |
| NM_005034    | POLR2K      | 0.43 | NM_021038    | MBNL1     | 0.43 |
| NM_006508    | REGL        | 0.43 | NM_001005217 | FRG2      | 0.43 |
| NM_003315    | DNAJC7      | 0.43 | NM_152653    | UBE2E2    | 0.43 |
| NM_001075    | UGT2B10     | 0.43 | NM_017715    | ZNF3      | 0.43 |
| NM_014780    | CUL7        | 0.43 | NM_006407    | ARL6IP5   | 0.43 |
| NM_032632    | PAPOLA      | 0.43 | XM_374936    | KIAA1052  | 0.43 |
| NM_014309    | RBM9        | 0.43 | NM_017901    | TPCN1     | 0.43 |
| NM_019025    | SMOX        | 0.43 | NM_018962    | DSCR6     | 0.43 |
| NM_016173    | HEMK        | 0.43 | NM_014164    | FXYD5     | 0.43 |
| NM_053277    | CLIC6       | 0.43 | NM_018062    | FANCL     | 0.43 |
| NM_018294    | CWF19L1     | 0.43 | NM_033049    | MUC13     | 0.43 |
| NM_020818    | KIAA1409    | 0.43 | NM_021237    | SELK      | 0.43 |
| NM_022107    | GPSM3       | 0.43 | NM_022466    | ZNFN1A5   | 0.43 |
| NM_024860    | FLJ21148    | 0.43 | NM_031477    | MGC10500  | 0.43 |
| NM_032773    | LRCH3       | 0.43 | NM_032648    | MGC10820  | 0.43 |
| XM_053966    | LOC113230   | 0.43 | NM_138462    | ZMYND19   | 0.43 |
| NM_152313    | SLC36A4     | 0.43 | NM_182513    | SPC24     | 0.43 |
| NM_152540    | SCFD2       | 0.43 | NM_175737    | LOC152831 | 0.43 |
| XM_208270    | BA395L14.13 | 0.43 | NM_207397    | UNQ6122   | 0.43 |
| NM_198541    | UNQ644      | 0.43 | XM_209936    | LOC286187 | 0.43 |
| XM_372792    | LOC391092   | 0.43 | XM_375821    | LOC400799 | 0.43 |
| XM_374065    | LOC389183   | 0.43 | XM_374196    | LOC389452 | 0.43 |
| XM_374139    | LOC389330   | 0.43 | XM_376469    | LOC401236 | 0.43 |
| XM_376655    | LOC401391   | 0.43 | XM_370709    | LOC387894 | 0.43 |
| XM_375602    | LOC400687   | 0.43 | XM_373659    | LOC388204 | 0.43 |
| XM_378730    | LOC400638   | 0.43 | XM_378753    | LOC400655 | 0.43 |
| NM_001004467 | OR10J3      | 0.43 | XM_378124    | LOC402414 | 0.43 |
| NM_054106    | OR5AC2      | 0.43 | NM_004734    | DCAMKL1   | 0.44 |
| NM_006039    | MRC2        | 0.44 | NM_032553    | FKSG79    | 0.44 |
| NM_014322    | OPN3        | 0.44 | NM_007203    | AKAP2     | 0.44 |
| NM_001060    | TBXA2R      | 0.44 | NM_006389    | HYOU1     | 0.44 |
| NM_021926    | ALX4        | 0.44 | NM_005642    | TAF7      | 0.44 |
| NM_001919    | DCI         | 0.44 | NM_004483    | GCSH      | 0.44 |
| NM_178154    | FUT8        | 0.44 | NM_005539    | INPP5A    | 0.44 |
| NM_005173    | ATP2A3      | 0.44 | NM_020886    | USP28     | 0.44 |
| NM_018438    | FBXO6       | 0.44 | NM_006404    | PROCR     | 0.44 |
| NM_007240    | DUSP12      | 0.44 | NM_002351    | SH2D1A    | 0.44 |
| NM_004874    | BAG4        | 0.44 | NM_005903    | SMAD5     | 0.44 |
| NM_000696    | ALDH9A1     | 0.44 | NM_000334    | SCN4A     | 0.44 |
| NM_032304    | HAGHL       | 0.44 | NM_016359    | NUSAP1    | 0.44 |
| NM_014159    | HYPB        | 0.44 | NM_020229    | PRDM11    | 0.44 |
| NM_014433    | RTDR1       | 0.44 | NM_005625    | SDCBP     | 0.44 |
| XM_371844    | TSPYL1      | 0.44 | NM_004293    | GDA       | 0.44 |

|           |               |      |           |           |      |
|-----------|---------------|------|-----------|-----------|------|
| NM_016138 | COQ7          | 0.44 | NM_007178 | STRAP     | 0.44 |
| NM_006839 | IMMT          | 0.44 | NM_006683 | FAM12A    | 0.44 |
| NM_012088 | PGLS          | 0.44 | NM_012413 | QPCT      | 0.44 |
| XM_036708 | KIAA0368      | 0.44 | NM_015453 | THUMPD3   | 0.44 |
| NM_016608 | ARMCX1        | 0.44 | NM_016144 | COMMD10   | 0.44 |
| NM_017938 | FLJ20716      | 0.44 | NM_018165 | PB1       | 0.44 |
| NM_017544 | NRF           | 0.44 | NM_018925 | PCDHGB5   | 0.44 |
| XM_044434 | KIAA1458      | 0.44 | NM_024711 | HIAN2     | 0.44 |
| NM_031938 | BCDO2         | 0.44 | NM_032299 | MGC2714   | 0.44 |
| NM_032641 | GRCC9         | 0.44 | NM_138355 | SCRN2     | 0.44 |
| NM_138433 | LOC113730     | 0.44 | NM_133496 | SLC30A7   | 0.44 |
| NM_152499 | MGC45441      | 0.44 | NM_152888 | COL22A1   | 0.44 |
| NM_144998 | STRA13        | 0.44 | NM_207344 | LOC283377 | 0.44 |
| NM_197941 | LOC345667     | 0.44 | NM_206827 | RASL11A   | 0.44 |
| NM_198531 | ATP9B         | 0.44 | NM_206834 | C6ORF201  | 0.44 |
| XM_291627 | LOC343531     | 0.44 | XM_086732 | LOC149950 | 0.44 |
| XM_085463 | LOC146439     | 0.44 | XM_374120 | LOC389288 | 0.44 |
| XM_379660 | LOC401545     | 0.44 | XM_379990 | LOC402637 | 0.44 |
| NM_000189 | HK2           | 0.45 | NM_001408 | CELSR2    | 0.45 |
| NM_015282 | CLASP1        | 0.45 | NM_003281 | TNNI1     | 0.45 |
| NM_006633 | IQGAP2        | 0.45 | NM_013434 | CSEN      | 0.45 |
| NM_003097 | SNRPN         | 0.45 | NM_006060 | ZNFN1A1   | 0.45 |
| NM_000497 | CYP11B1       | 0.45 | NM_001398 | ECH1      | 0.45 |
| NM_021139 | UGT2B4        | 0.45 | NM_002691 | POLD1     | 0.45 |
| NM_015294 | TRIM37        | 0.45 | NM_006247 | PPP5C     | 0.45 |
| NM_000804 | FOLR3         | 0.45 | NM_052887 | TIRAP     | 0.45 |
| NM_021068 | IFNA4         | 0.45 | NM_030753 | WNT3      | 0.45 |
| NM_000424 | KRT5          | 0.45 | NM_005330 | HBE1      | 0.45 |
| NM_172363 | HMG1L10       | 0.45 | NM_006308 | HSPB3     | 0.45 |
| AK090464  | IGHG3         | 0.45 | NM_001928 | DF        | 0.45 |
| NM_002302 | LECT2         | 0.45 | NM_014234 | HSD17B8   | 0.45 |
| NM_181503 | EXOSC8        | 0.45 | NM_015286 | DMN       | 0.45 |
| NM_015085 | GARNL4        | 0.45 | NM_012229 | NT5C2     | 0.45 |
| NM_014285 | EXOSC2        | 0.45 | NM_015608 | C10ORF137 | 0.45 |
| NM_016287 | HP1-BP74      | 0.45 | NM_016079 | VPS24     | 0.45 |
| NM_018086 | FIGN          | 0.45 | NM_019849 | SLC7A10   | 0.45 |
| NM_019099 | LOC55924      | 0.45 | NM_019119 | PCDHB9    | 0.45 |
| NM_030785 | RSHL1         | 0.45 | NM_025078 | PQLC1     | 0.45 |
| NM_030800 | DKFZP564O1664 | 0.45 | XM_042978 | KIAA1817  | 0.45 |
| NM_080652 | MGC15397      | 0.45 | NM_207309 | UAP1L1    | 0.45 |
| NM_178452 | LOC123872     | 0.45 | NM_144635 | MGC21688  | 0.45 |
| NM_144644 | SPATA4        | 0.45 | NM_194287 | LOC145497 | 0.45 |
| NM_172004 | DCAL1         | 0.45 | NM_145080 | NSMCE1    | 0.45 |
| NM_152654 | FLJ38607      | 0.45 | NM_152688 | KHDRBS2   | 0.45 |
| XM_172929 | LOC255189     | 0.45 | NM_173827 | FLJ38991  | 0.45 |
| NM_198516 | MGC71806      | 0.45 | NM_198525 | LOC374654 | 0.45 |

|              |           |      |           |           |      |
|--------------|-----------|------|-----------|-----------|------|
| NM_005462    | MAGEC1    | 0.45 | XM_379214 | LOC339942 | 0.45 |
| XM_291169    | LOC340204 | 0.45 | XM_371728 | LOC389276 | 0.45 |
| XM_372180    | LOC389827 | 0.45 | XM_380104 | LOC402485 | 0.45 |
| XM_376986    | LOC401584 | 0.45 | NM_012288 | TRAM2     | 0.45 |
| NM_004721    | MAP3K13   | 0.46 | NM_004752 | GCM2      | 0.46 |
| NM_000177    | GSN       | 0.46 | NM_006431 | CCT2      | 0.46 |
| NM_018848    | MKKS      | 0.46 | NM_005093 | CBFA2T2   | 0.46 |
| NM_001730    | KLF5      | 0.46 | NM_018300 | ZNF83     | 0.46 |
| NM_005655    | TIEG      | 0.46 | NM_000790 | DDC       | 0.46 |
| NM_001218    | CA12      | 0.46 | NM_020184 | CNNM4     | 0.46 |
| NM_001228    | CASP8     | 0.46 | NM_003672 | CDC14A    | 0.46 |
| NM_130771    | OSCAR     | 0.46 | NM_000714 | BZRP      | 0.46 |
| NM_021798    | IL21R     | 0.46 | NM_020548 | DBI       | 0.46 |
| NM_002517    | NPAS1     | 0.46 | NM_005122 | NR113     | 0.46 |
| NM_015166    | MLC1      | 0.46 | NM_005256 | GAS2      | 0.46 |
| NM_000902    | MME       | 0.46 | NM_004584 | RAD9A     | 0.46 |
| NM_000860    | HPGD      | 0.46 | NM_007150 | ZNF185    | 0.46 |
| NM_004653    | JARID1D   | 0.46 | NM_003963 | TM4SF5    | 0.46 |
| NM_014673    | KIAA0103  | 0.46 | NM_006321 | ARIH2     | 0.46 |
| NM_004263    | SEMA4F    | 0.46 | XM_290471 | KIAA0261  | 0.46 |
| NM_015399    | BRMS1     | 0.46 | NM_013333 | EPN1      | 0.46 |
| NM_013433    | TNPO2     | 0.46 | NM_019028 | ZDHHC13   | 0.46 |
| NM_018997    | MRPS21    | 0.46 | NM_018479 | ECHDC1    | 0.46 |
| NM_020463    | KIAA1387  | 0.46 | NM_020957 | PCDHB16   | 0.46 |
| NM_031943    | IFP38     | 0.46 | NM_031952 | SPATA9    | 0.46 |
| NM_030960    | SPACA1    | 0.46 | NM_032882 | PNMA6A    | 0.46 |
| NM_138414    | LOC112869 | 0.46 | NM_052924 | RHPN1     | 0.46 |
| NM_152301    | PP784     | 0.46 | NM_033647 | HELB      | 0.46 |
| XM_059341    | LOC129293 | 0.46 | NM_153000 | APCDD1    | 0.46 |
| NM_144657    | FLJ30678  | 0.46 | NM_145052 | MGC23937  | 0.46 |
| NM_173509    | MGC16664  | 0.46 | NM_175881 | MGC48986  | 0.46 |
| NM_152760    | FLJ30934  | 0.46 | XM_373522 | LOC283314 | 0.46 |
| NM_147196    | TMIE      | 0.46 | NM_173651 | FSIP2     | 0.46 |
| NM_178176    | MOGAT3    | 0.46 | XM_060880 | LOC128208 | 0.46 |
| NM_021092    | PPY2      | 0.46 | XM_291607 | LOC343505 | 0.46 |
| XM_379363    | LOC401212 | 0.46 | XM_372045 | LOC389663 | 0.46 |
| XM_377488    | LOC401891 | 0.46 | XM_374484 | LOC392742 | 0.46 |
| NM_001005405 | KRTAP5-11 | 0.46 | NM_003775 | EDG6      | 0.47 |
| NM_018492    | TOPK      | 0.47 | NM_032575 | GLIS2     | 0.47 |
| NM_000107    | DDB2      | 0.47 | NM_005931 | MICB      | 0.47 |
| NM_012421    | RLF       | 0.47 | NM_033343 | LHX4      | 0.47 |
| NM_016571    | GLULD1    | 0.47 | NM_021033 | RAP2A     | 0.47 |
| NM_004227    | PSCD3     | 0.47 | NM_013447 | EMR2      | 0.47 |
| NM_003014    | SFRP4     | 0.47 | NM_138410 | CKLFSF7   | 0.47 |
| NM_139163    | ALS2CR12  | 0.47 | NM_015431 | BIA2      | 0.47 |
| NM_003843    | SCEL      | 0.47 | NM_004546 | NDUFB2    | 0.47 |

|           |           |      |           |               |      |
|-----------|-----------|------|-----------|---------------|------|
| NM_006944 | SPP2      | 0.47 | NM_005987 | SPRR1A        | 0.47 |
| NM_012070 | ATRN      | 0.47 | NM_003680 | YARS          | 0.47 |
| NM_003695 | LY6D      | 0.47 | NM_006333 | C1D           | 0.47 |
| NM_015284 | KIAA0467  | 0.47 | NM_012450 | SLC13A4       | 0.47 |
| NM_013353 | TMOD4     | 0.47 | XM_372997 | OR5K1         | 0.47 |
| NM_015954 | CGI-26    | 0.47 | NM_013299 | HSU79266      | 0.47 |
| NM_017896 | C20ORF11  | 0.47 | XM_371822 | C6ORF110      | 0.47 |
| NM_018448 | TIP120A   | 0.47 | NM_052839 | PANX2         | 0.47 |
| XM_047550 | ZNF492    | 0.47 | NM_021199 | SQRDL         | 0.47 |
| NM_022095 | ZNF335    | 0.47 | NM_138415 | LOC112885     | 0.47 |
| NM_024907 | FBXO17    | 0.47 | NM_138390 | LOC92691      | 0.47 |
| NM_173476 | FLJ34512  | 0.47 | NM_181707 | LOC124773     | 0.47 |
| NM_152292 | RG9MTD2   | 0.47 | NM_153007 | ODF4          | 0.47 |
| XM_373742 | MGC40489  | 0.47 | NM_173518 | FLJ25692      | 0.47 |
| NM_181785 | LOC283537 | 0.47 | XM_376413 | DKFZP564C0469 | 0.47 |
| NM_181756 | ZNF233    | 0.47 | XM_059140 | LOC127391     | 0.47 |
| XM_172852 | LOC256676 | 0.47 | XM_377935 | LOC402253     | 0.47 |
| XM_379819 | LOC402489 | 0.47 | XM_372063 | LOC389697     | 0.47 |
| XM_372337 | LOC390020 | 0.47 | XM_372611 | LOC390680     | 0.47 |
| XM_372641 | LOC390736 | 0.47 | XM_373718 | LOC388348     | 0.47 |
| NM_001954 | DDR1      | 0.48 | NM_001315 | MAPK14        | 0.48 |
| NM_002416 | CXCL9     | 0.48 | NM_000623 | BDKRB2        | 0.48 |
| NM_018910 | PCDHA7    | 0.48 | NM_017852 | NALP2         | 0.48 |
| NM_004641 | MLLT10    | 0.48 | NM_001528 | HGFAC         | 0.48 |
| NM_012410 | PSK-1     | 0.48 | NM_006153 | NCK1          | 0.48 |
| NM_003240 | EBAF      | 0.48 | NM_000382 | ALDH3A2       | 0.48 |
| NM_005459 | GUCA1C    | 0.48 | NM_020157 | OTOR          | 0.48 |
| NM_001921 | DCTD      | 0.48 | XM_038970 | SLC8A2        | 0.48 |
| NM_003262 | TLOC1     | 0.48 | NM_006524 | ZNF138        | 0.48 |
| NM_016324 | ZNF274    | 0.48 | NM_014923 | FNDC3         | 0.48 |
| XM_290559 | GRIP1     | 0.48 | NM_015420 | DKFZP564O0463 | 0.48 |
| NM_012367 | OR2B6     | 0.48 | NM_019063 | EML4          | 0.48 |
| NM_015952 | RWDD1     | 0.48 | NM_018221 | MOBK1B        | 0.48 |
| NM_018060 | FLJ10326  | 0.48 | XM_290867 | RGL3          | 0.48 |
| NM_020427 | ARS       | 0.48 | NM_020233 | MDS006        | 0.48 |
| NM_021571 | ICEBERG   | 0.48 | NM_032656 | DHX37         | 0.48 |
| NM_024319 | C1ORF35   | 0.48 | NM_025248 | SNIP          | 0.48 |
| NM_032206 | NOD27     | 0.48 | XM_050988 | MLR2          | 0.48 |
| NM_032852 | APG4C     | 0.48 | NM_033127 | RGPR          | 0.48 |
| NM_138376 | TTC5      | 0.48 | NM_134268 | CYGB          | 0.48 |
| NM_144603 | NOXO1     | 0.48 | NM_138331 | RNASE8        | 0.48 |
| NM_173491 | LSM11     | 0.48 | NM_152402 | TRAM1L1       | 0.48 |
| NM_144653 | BTBD14A   | 0.48 | NM_152487 | FLJ31842      | 0.48 |
| NM_153712 | TTL       | 0.48 | NM_153230 | FBXO39        | 0.48 |
| XM_375754 | LOC163404 | 0.48 | XM_375187 | NUT           | 0.48 |
| NM_175738 | RAB37     | 0.48 | XM_378923 | LOC339476     | 0.48 |

|           |           |      |           |               |      |
|-----------|-----------|------|-----------|---------------|------|
| NM_207404 | FLJ45880  | 0.48 | NM_206998 | SCGB1D4       | 0.48 |
| XM_293570 | LOC344741 | 0.48 | XM_378859 | LOC400751     | 0.48 |
| XM_374131 | LOC389311 | 0.48 | XM_374141 | LOC389332     | 0.48 |
| XM_379977 | LOC402629 | 0.48 | XM_372375 | LOC390110     | 0.48 |
| XM_370849 | LOC388107 | 0.48 | XM_370722 | LOC387921     | 0.48 |
| XM_373370 | LOC392539 | 0.48 | NM_001787 | CDC2L1        | 0.49 |
| NM_012145 | DTYMK     | 0.49 | NM_001396 | DYRK1A        | 0.49 |
| NM_006742 | PSKH1     | 0.49 | NM_018425 | PI4KII        | 0.49 |
| NM_003384 | VRK1      | 0.49 | NM_005201 | CCR8          | 0.49 |
| NM_018934 | PCDHB14   | 0.49 | NM_002598 | PDCD2         | 0.49 |
| NM_022470 | WIG1      | 0.49 | NM_014352 | POU2F3        | 0.49 |
| NM_003677 | DENR      | 0.49 | NM_001328 | CTBP1         | 0.49 |
| NM_000287 | PEX6      | 0.49 | NM_012237 | SIRT2         | 0.49 |
| NM_002585 | PBX1      | 0.49 | NM_022148 | CRLF2         | 0.49 |
| NM_003671 | CDC14B    | 0.49 | NM_000266 | NDP           | 0.49 |
| NM_000220 | KCNJ1     | 0.49 | NM_020307 | CCNL1         | 0.49 |
| NM_173860 | HOXC12    | 0.49 | NM_014576 | ACF           | 0.49 |
| NM_173567 | ABHD7     | 0.49 | NM_006262 | PRPH          | 0.49 |
| NM_005671 | D8S2298E  | 0.49 | NM_003370 | VASP          | 0.49 |
| NM_032493 | AP1M1     | 0.49 | NM_014799 | HEPH          | 0.49 |
| NM_016111 | KIAA0683  | 0.49 | NM_015726 | H326          | 0.49 |
| NM_013377 | PDZRN4    | 0.49 | NM_016103 | SARA2         | 0.49 |
| NM_017762 | FLJ20313  | 0.49 | NM_017727 | FLJ20254      | 0.49 |
| NM_017612 | ZCCHC8    | 0.49 | NM_019601 | SUSD2         | 0.49 |
| NM_020751 | COG6      | 0.49 | NM_021945 | C6ORF85       | 0.49 |
| NM_177441 | MGC3123   | 0.49 | NM_024552 | LASS4         | 0.49 |
| NM_024780 | TMC5      | 0.49 | NM_024847 | TMC7          | 0.49 |
| NM_133457 | EMID2     | 0.49 | NM_145269 | LOC137392     | 0.49 |
| XM_047499 | RNF187    | 0.49 | NM_144969 | ZDHHC15       | 0.49 |
| NM_173698 | FLJ37659  | 0.49 | NM_207485 | FLJ41327      | 0.49 |
| XM_065124 | LOC126502 | 0.49 | XM_293018 | LOC344332     | 0.49 |
| XM_098317 | LOC153134 | 0.49 | XM_292109 | LOC341511     | 0.49 |
| XM_098828 | LOC157813 | 0.49 | XM_373319 | LOC392395     | 0.49 |
| XM_372302 | LOC389932 | 0.49 | NM_001394 | DUSP4         | 0.5  |
| NM_013355 | PKN3      | 0.5  | NM_002350 | LYN           | 0.5  |
| NM_000273 | GPR143    | 0.5  | NM_030903 | OR2W1         | 0.5  |
| NM_181882 | PRX       | 0.5  | NM_002198 | IRF1          | 0.5  |
| NM_004681 | EIF1AY    | 0.5  | NM_153696 | PSMAL/GCP III | 0.5  |
| NM_005449 | TOSO      | 0.5  | NM_003292 | TPR           | 0.5  |
| NM_000374 | UROD      | 0.5  | NM_002883 | RANGAP1       | 0.5  |
| NM_002660 | PLCG1     | 0.5  | NM_003590 | CUL3          | 0.5  |
| NM_002706 | PPM1B     | 0.5  | NM_019846 | CCL28         | 0.5  |
| NM_004673 | ANGPTL1   | 0.5  | NM_003264 | TLR2          | 0.5  |
| NM_000530 | MPZ       | 0.5  | NM_000559 | HBG1          | 0.5  |
| NM_006580 | CLDN16    | 0.5  | J05158    | CPN2          | 0.5  |
| NM_000129 | F13A1     | 0.5  | NM_020386 | HRASLS        | 0.5  |



|           |               |      |           |              |      |
|-----------|---------------|------|-----------|--------------|------|
| NM_007217 | PDCD10        | 0.5  | NM_002963 | S100A7       | 0.5  |
| NM_016448 | RAMP          | 0.5  | NM_018117 | WDR11        | 0.5  |
| NM_021116 | ADCY1         | 0.5  | NM_001418 | EIF4G2       | 0.5  |
| NM_002532 | NUP88         | 0.5  | NM_005927 | MFAP3        | 0.5  |
| NM_005407 | SALL2         | 0.5  | NM_003539 | HIST1H4D     | 0.5  |
| NM_005797 | EVA1          | 0.5  | XM_047214 | C22ORF9      | 0.5  |
| NM_144563 | RPIA          | 0.5  | NM_016072 | CGI-141      | 0.5  |
| NM_016242 | EMCN          | 0.5  | NM_017757 | ZNF407       | 0.5  |
| NM_018332 | FLJ11126      | 0.5  | NM_024345 | MGC10765     | 0.5  |
| NM_024835 | ZNF403        | 0.5  | NM_030780 | MFTC         | 0.5  |
| XM_046911 | ZDHHC18       | 0.5  | NM_033132 | ZIC5         | 0.5  |
| NM_194277 | LOC90167      | 0.5  | NM_138450 | ARL11        | 0.5  |
| NM_178275 | DKFZP434B1231 | 0.5  | XM_371328 | DJ383J4.3    | 0.5  |
| NM_198923 | MRGPRD        | 0.5  | NM_152318 | MGC40397     | 0.5  |
| NM_182502 | DKFZP686L1818 | 0.5  | XM_097736 | C20ORF82     | 0.5  |
| NM_152472 | ZNF578        | 0.5  | NM_178861 | ZNF183L1     | 0.5  |
| XM_371039 | MGC19764      | 0.5  | NM_183372 | LOC200030    | 0.5  |
| NM_175734 | LOC201243     | 0.5  | NM_174937 | TCERG1L      | 0.5  |
| NM_173580 | FLJ39058      | 0.5  | NM_152772 | MGC40368     | 0.5  |
| NM_178033 | CYP4X1        | 0.5  | NM_207007 | CCL4L1       | 0.5  |
| NM_207471 | FLJ42200      | 0.5  | NM_203303 | LOC389874    | 0.5  |
| NM_207500 | FLJ44955      | 0.5  | XM_291392 | LOC343066    | 0.5  |
| XM_088797 | LOC163301     | 0.5  | XM_098117 | LOC151760    | 0.5  |
| XM_374053 | LOC389153     | 0.5  | XM_371591 | LOC389072    | 0.5  |
| XM_378453 | LOC400208     | 0.5  | NM_024619 | FN3KRP       | 0.51 |
| NM_020526 | EPHA8         | 0.51 | NM_007181 | MAP4K1       | 0.51 |
| NM_001704 | BAI3          | 0.51 | NM_176881 | TAS2R39      | 0.51 |
| NM_001810 | CENPB         | 0.51 | NM_002441 | MSH5         | 0.51 |
| NM_003024 | ITSN1         | 0.51 | NM_004332 | BPHL         | 0.51 |
| NM_003577 | UTF1          | 0.51 | NM_000127 | EXT1         | 0.51 |
| NM_024308 | MGC4172       | 0.51 | NM_022662 | ANAPC1       | 0.51 |
| NM_012164 | FBXW2         | 0.51 | NM_001567 | INPPL1       | 0.51 |
| NM_004642 | CDK2AP1       | 0.51 | NM_002176 | IFNB1        | 0.51 |
| NM_003152 | STAT5A        | 0.51 | NM_033031 | CCNB3        | 0.51 |
| XM_291057 | CLASP2        | 0.51 | NM_003025 | SH3GL1       | 0.51 |
| NM_002477 | MYL5          | 0.51 | NM_002967 | SAFB         | 0.51 |
| NM_002773 | PRSS8         | 0.51 | NM_012339 | NET-7        | 0.51 |
| NM_012460 | TIMM9         | 0.51 | NM_015655 | ZNF337       | 0.51 |
| NM_013373 | ZDHHC8        | 0.51 | NM_017814 | FLJ20422     | 0.51 |
| NM_017848 | CXORF17       | 0.51 | NM_020122 | KCMF1        | 0.51 |
| NM_003776 | MRPL40        | 0.51 | NM_024623 | FLJ13491     | 0.51 |
| NM_024808 | FLJ22624      | 0.51 | NM_025160 | WDR26        | 0.51 |
| XM_054284 | H2-ALPHA      | 0.51 | NM_080924 | LOC91219     | 0.51 |
| NM_133444 | ZNF526        | 0.51 | NM_152411 | DKFZP7621137 | 0.51 |
| XM_378507 | LOC145845     | 0.51 | NM_080430 | SELM         | 0.51 |
| XM_378921 | LOC148756     | 0.51 | NM_207352 | CYP4V2       | 0.51 |

|              |           |      |           |           |      |
|--------------|-----------|------|-----------|-----------|------|
| NM_207398    | FLJ38822  | 0.51 | NM_207412 | FLJ43582  | 0.51 |
| XM_294802    | LOC339077 | 0.51 | XM_291395 | LOC343069 | 0.51 |
| XM_171171    | LOC255374 | 0.51 | XM_301210 | LOC388775 | 0.51 |
| XM_373080    | LOC391770 | 0.51 | XM_372870 | LOC391257 | 0.51 |
| XM_371429    | LOC388852 | 0.51 | NM_003656 | CAMK1     | 0.52 |
| NM_138293    | ATM       | 0.52 | NM_004217 | AURKB     | 0.52 |
| NM_173354    | SNF1LK    | 0.52 | NM_006091 | CORO2B    | 0.52 |
| NM_020451    | SEPN1     | 0.52 | NM_005957 | MTHFR     | 0.52 |
| NM_000153    | GALC      | 0.52 | NM_001349 | DARS      | 0.52 |
| NM_003614    | GALR3     | 0.52 | NM_014875 | KIF14     | 0.52 |
| NM_003332    | TYROBP    | 0.52 | NM_003175 | XCL2      | 0.52 |
| NM_000901    | NR3C2     | 0.52 | NM_018662 | DISC1     | 0.52 |
| NM_020364    | DAZ3      | 0.52 | NM_022487 | DCLRE1C   | 0.52 |
| NM_021176    | G6PC2     | 0.52 | NM_021907 | DTNB      | 0.52 |
| NM_001414    | EIF2B1    | 0.52 | NM_032020 | FUCA2     | 0.52 |
| NM_004987    | LIMS1     | 0.52 | NM_024747 | HPS6      | 0.52 |
| NM_015167    | PTDSR     | 0.52 | NM_002348 | LY9       | 0.52 |
| NM_006160    | NEUROD2   | 0.52 | NM_014227 | SLC5A4    | 0.52 |
| NM_002933    | RNASE1    | 0.52 | XM_376917 | FUBP3     | 0.52 |
| NM_005838    | GLYAT     | 0.52 | NM_007357 | COG2      | 0.52 |
| NM_206995    | C10ORF1   | 0.52 | NM_014035 | SNX24     | 0.52 |
| NM_014594    | ZNF354C   | 0.52 | NM_019022 | FLJ20793  | 0.52 |
| NM_024496    | C14ORF4   | 0.52 | NM_022733 | LOC64744  | 0.52 |
| NM_022133    | SNX16     | 0.52 | NM_022894 | PAPOLG    | 0.52 |
| NM_024096    | XTP3TPA   | 0.52 | NM_020858 | SEMA6D    | 0.52 |
| NM_025048    | FLJ22684  | 0.52 | NM_032937 | C9ORF37   | 0.52 |
| NM_178472    | C20ORF53  | 0.52 | NM_152485 | FLJ25078  | 0.52 |
| NM_173512    | FLJ39822  | 0.52 | NM_153707 | C9ORF138  | 0.52 |
| NM_173582    | PGM2L1    | 0.52 | NM_153262 | SYT14     | 0.52 |
| XM_209363    | PTPNS1L3  | 0.52 | NM_181622 | KRTAP13-3 | 0.52 |
| XM_293893    | LRG47     | 0.52 | NM_180991 | SLCO4C1   | 0.52 |
| NM_003171    | SUPV3L1   | 0.52 | XM_211764 | LOC285095 | 0.52 |
| XM_291154    | LOC340152 | 0.52 | XM_212123 | LOC285995 | 0.52 |
| XM_378033    | LOC402340 | 0.52 | XM_380008 | LOC402665 | 0.52 |
| XM_378567    | LOC400505 | 0.52 | XM_373684 | LOC388274 | 0.52 |
| NM_001005487 | OR13G1    | 0.52 | NM_001381 | DOK1      | 0.53 |
| NM_020922    | PRKWINK3  | 0.53 | NM_005027 | PIK3R2    | 0.53 |
| NM_000952    | PTAFR     | 0.53 | NM_014800 | ELMO1     | 0.53 |
| NM_001812    | CENPC1    | 0.53 | NM_012296 | GAB2      | 0.53 |
| NM_004058    | CAPS      | 0.53 | NM_145173 | DIRAS1    | 0.53 |
| NM_052838    | 37135     | 0.53 | NM_005011 | NRF1      | 0.53 |
| NM_004079    | CTSS      | 0.53 | NM_000500 | CYP21A2   | 0.53 |
| NM_003252    | TIAL1     | 0.53 | NM_003896 | SIAT9     | 0.53 |
| NM_019116    | UBPH      | 0.53 | NM_001752 | CAT       | 0.53 |
| NM_020903    | USP29     | 0.53 | NM_000252 | MTM1      | 0.53 |
| NM_002224    | ITPR3     | 0.53 | NM_030956 | TLR10     | 0.53 |

|           |           |      |           |              |      |
|-----------|-----------|------|-----------|--------------|------|
| NM_018965 | TREM2     | 0.53 | NM_000735 | CGA          | 0.53 |
| NM_004961 | GABRE     | 0.53 | NM_004237 | TRIP13       | 0.53 |
| NM_005422 | TECTA     | 0.53 | NM_012097 | ARL5         | 0.53 |
| NM_005880 | DNAJA2    | 0.53 | NM_000146 | FTL          | 0.53 |
| NM_014060 | MCTS1     | 0.53 | NM_003002 | SDHD         | 0.53 |
| NM_004344 | CETN2     | 0.53 | NM_002347 | LY6H         | 0.53 |
| NM_004544 | NDUFA10   | 0.53 | NM_006226 | PLCL1        | 0.53 |
| NM_004160 | PYY       | 0.53 | NM_021089 | ZNF8         | 0.53 |
| NM_003838 | FPGT      | 0.53 | NM_021067 | KIAA0186     | 0.53 |
| NM_006828 | HELIC1    | 0.53 | NM_014505 | KCNMB4       | 0.53 |
| NM_019049 | FLJ20054  | 0.53 | XM_375684 | HES2         | 0.53 |
| NM_017927 | MFN1      | 0.53 | NM_018712 | DKFZP547C176 | 0.53 |
| NM_020356 | C20ORF32  | 0.53 | NM_021246 | LY6G6D       | 0.53 |
| NM_030812 | LOC81569  | 0.53 | NM_031448 | C19ORF12     | 0.53 |
| NM_032506 | KIAA1841  | 0.53 | XM_032678 | LOC90576     | 0.53 |
| NM_052897 | MBD6      | 0.53 | NM_181435 | C1QTNF3      | 0.53 |
| NM_152404 | FLJ34658  | 0.53 | NM_152288 | MGC13024     | 0.53 |
| NM_153337 | SLIC1     | 0.53 | NM_178833 | LOC133308    | 0.53 |
| NM_173794 | FUNDC1    | 0.53 | NM_152731 | C6ORF65      | 0.53 |
| NM_139179 | LOC221955 | 0.53 | NM_177533 | NUDT14       | 0.53 |
| NM_178567 | MGC42638  | 0.53 | NM_207432 | FLJ45436     | 0.53 |
| XM_294743 | LOC338918 | 0.53 | XM_064879 | LOC125958    | 0.53 |
| XM_290351 | LOC339843 | 0.53 | XM_117030 | LOC197387    | 0.53 |
| XM_373474 | LOC387710 | 0.53 | XM_373527 | LOC387846    | 0.53 |
| XM_377407 | LOC401827 | 0.53 | XM_375357 | LOC400537    | 0.53 |
| XM_373910 | LOC388791 | 0.53 | NM_015148 | PASK         | 0.54 |
| NM_014602 | PIK3R4    | 0.54 | NM_004951 | EBI2         | 0.54 |
| NM_005756 | GPR64     | 0.54 | NM_001777 | CD47         | 0.54 |
| NM_006141 | DNCL12    | 0.54 | NM_001944 | DSG3         | 0.54 |
| NM_014739 | BCLAF1    | 0.54 | NM_001913 | CUTL1        | 0.54 |
| NM_004535 | MYT1      | 0.54 | NM_080473 | GATA5        | 0.54 |
| NM_003198 | TCEB3     | 0.54 | NM_012252 | TFEC         | 0.54 |
| NM_004893 | H2AFY     | 0.54 | NM_018441 | PECR         | 0.54 |
| NM_003279 | TNNC2     | 0.54 | NM_000460 | THPO         | 0.54 |
| NM_002535 | OAS2      | 0.54 | NM_004259 | RECQL5       | 0.54 |
| NM_000429 | MAT1A     | 0.54 | NM_003636 | KCNAB2       | 0.54 |
| NM_004109 | FDX1      | 0.54 | NM_004669 | CLIC3        | 0.54 |
| NM_005090 | PLA2G4B   | 0.54 | NM_006928 | SILV         | 0.54 |
| NM_017883 | WDR13     | 0.54 | NM_004436 | ENSA         | 0.54 |
| NM_002725 | PRELP     | 0.54 | NM_002523 | NPTX2        | 0.54 |
| NM_002861 | PCYT2     | 0.54 | NM_004256 | SLC22A13     | 0.54 |
| NM_014878 | KIAA0020  | 0.54 | NM_006375 | COVA1        | 0.54 |
| NM_005094 | SLC27A4   | 0.54 | NM_014613 | ETEA         | 0.54 |
| NM_015666 | GTPBP5    | 0.54 | NM_016948 | PAR6A        | 0.54 |
| NM_015939 | CGI-09    | 0.54 | NM_018019 | MED25        | 0.54 |
| XM_290829 | INTERSEX  | 0.54 | NM_018710 | DKFZP762O076 | 0.54 |

|              |              |      |           |           |      |
|--------------|--------------|------|-----------|-----------|------|
| NM_020373    | TMEM16B      | 0.54 | NM_020770 | CGN       | 0.54 |
| NM_022362    | MMS19L       | 0.54 | NM_022786 | ARV1      | 0.54 |
| NM_024826    | FLJ21159     | 0.54 | NM_025153 | FLJ21477  | 0.54 |
| NM_030574    | STARD5       | 0.54 | NM_031431 | COG3      | 0.54 |
| NM_032756    | MGC15668     | 0.54 | NM_031911 | C1QTNF7   | 0.54 |
| NM_173478    | FLJ40137     | 0.54 | NM_152386 | SGPP2     | 0.54 |
| NM_024095    | ASB8         | 0.54 | NM_182519 | C20orf186 | 0.54 |
| NM_176814    | LOC168850    | 0.54 | NM_198989 | DLEU7     | 0.54 |
| XM_371369    | FLJ39207     | 0.54 | NM_198577 | FLJ46361  | 0.54 |
| NM_206997    | GPR152       | 0.54 | XM_293671 | LOC344988 | 0.54 |
| XM_061666    | LOC119764    | 0.54 | XM_293325 | LOC347411 | 0.54 |
| XM_208058    | LOC283247    | 0.54 | XM_352463 | LOC391408 | 0.54 |
| XM_374012    | LOC389043    | 0.54 | XM_371824 | LOC389395 | 0.54 |
| XM_372154    | LOC389803    | 0.54 | XM_372010 | LOC389607 | 0.54 |
| XM_373452    | LOC387649    | 0.54 | XM_370873 | LOC388135 | 0.54 |
| XM_370840    | LOC388085    | 0.54 | XM_372878 | LOC391282 | 0.54 |
| NM_001004067 | NOMO3        | 0.54 | NM_001654 | ARAF1     | 0.55 |
| NM_001400    | EDG1         | 0.55 | NM_000145 | FSHR      | 0.55 |
| NM_005295    | GPR22        | 0.55 | NM_001257 | CDH13     | 0.55 |
| NM_001833    | CLTA         | 0.55 | NM_032587 | CARD6     | 0.55 |
| NM_006149    | LGALS4       | 0.55 | NM_000192 | TBX5      | 0.55 |
| NM_003866    | INPP4B       | 0.55 | NM_003366 | UQCRC2    | 0.55 |
| NM_006739    | MCM5         | 0.55 | NM_016334 | SH120     | 0.55 |
| NM_002063    | GLRA2        | 0.55 | NM_174975 | SEC14L3   | 0.55 |
| NM_000721    | CACNA1E      | 0.55 | NM_000441 | SLC26A4   | 0.55 |
| NM_014937    | INPP5F       | 0.55 | NM_021052 | HIST1H2AE | 0.55 |
| NM_004486    | GOLGA2       | 0.55 | NM_005561 | LAMP1     | 0.55 |
| NM_002553    | ORC5L        | 0.55 | NM_173705 | MTCO2     | 0.55 |
| NM_006014    | DXS9879E     | 0.55 | NM_003178 | SYN2      | 0.55 |
| NM_003598    | TEAD2        | 0.55 | NM_003654 | CHST1     | 0.55 |
| NM_005453    | ZNF297       | 0.55 | NM_004678 | BPY2      | 0.55 |
| NM_005773    | ZNF256       | 0.55 | XM_048592 | KIAA1045  | 0.55 |
| NM_013321    | SNX8         | 0.55 | NM_014595 | NT5C      | 0.55 |
| NM_014863    | GALNAC4S-6ST | 0.55 | NM_018472 | HT011     | 0.55 |
| NM_020698    | KIAA1145     | 0.55 | NM_023010 | UPF3B     | 0.55 |
| NM_032149    | DKFZP434G072 | 0.55 | NM_031947 | SLC25A2   | 0.55 |
| NM_138409    | C6ORF117     | 0.55 | NM_033315 | RASL10B   | 0.55 |
| NM_054112    | DEFB118      | 0.55 | NM_173791 | PDZK8     | 0.55 |
| NM_152361    | FLJ38944     | 0.55 | XM_371312 | FLJ39117  | 0.55 |
| NM_131915    | LOC150236    | 0.55 | NM_194289 | LOC152195 | 0.55 |
| NM_152618    | FLJ35630     | 0.55 | NM_152621 | MGC26963  | 0.55 |
| NM_017629    | EIF2C4       | 0.55 | XM_113776 | LOC196913 | 0.55 |
| NM_170745    | HIST1H2AA    | 0.55 | NM_199282 | LOC201176 | 0.55 |
| NM_198081    | SCML4        | 0.55 | NM_174939 | MGC39681  | 0.55 |
| XM_170736    | SLC25A30     | 0.55 | NM_198479 | FLJ40321  | 0.55 |
| XM_209163    | LOC284379    | 0.55 | NM_173620 | FLJ23825  | 0.55 |

|           |           |      |           |             |      |
|-----------|-----------|------|-----------|-------------|------|
| XM_378371 | LOC338758 | 0.55 | XM_211088 | LOC283604   | 0.55 |
| XM_291170 | LOC340192 | 0.55 | XM_294590 | LOC347265   | 0.55 |
| XM_374045 | LOC389139 | 0.55 | XM_373061 | LOC391749   | 0.55 |
| XM_371694 | LOC389207 | 0.55 | XM_374273 | LOC389669   | 0.55 |
| XM_379995 | LOC402641 | 0.55 | XM_372509 | LOC390445   | 0.55 |
| XM_372443 | LOC390275 | 0.55 | XM_373503 | LOC387777   | 0.55 |
| XM_375148 | LOC400299 | 0.55 | XM_379704 | LOC401588   | 0.55 |
| NM_005228 | EGFR      | 0.56 | NM_002221 | ITPKB       | 0.56 |
| NM_006449 | CDC42EP3  | 0.56 | NM_002149 | HPCAL1      | 0.56 |
| NM_018046 | VG5Q      | 0.56 | NM_018908 | PCDHA5      | 0.56 |
| NM_013340 | PCDHB1    | 0.56 | NM_007115 | TNFAIP6     | 0.56 |
| NM_001987 | ETV6      | 0.56 | NM_003643 | GCM1        | 0.56 |
| NM_014585 | SLC40A1   | 0.56 | NM_000438 | PAX3        | 0.56 |
| NM_003107 | SOX4      | 0.56 | NM_016243 | NQO3A2      | 0.56 |
| NM_138432 | SDSL      | 0.56 | NM_001734 | C1S         | 0.56 |
| NM_001874 | CPM       | 0.56 | NM_000929 | PLA2G5      | 0.56 |
| NM_025210 | I-4       | 0.56 | NM_021268 | IFNA17      | 0.56 |
| NM_004393 | DAG1      | 0.56 | NM_015049 | ALS2CR3     | 0.56 |
| NM_000453 | SLC5A5    | 0.56 | NM_016567 | BCCIP       | 0.56 |
| NM_018456 | EAF2      | 0.56 | NM_002038 | G1P3        | 0.56 |
| NM_006158 | NEFL      | 0.56 | NM_018842 | LOC55971    | 0.56 |
| NM_015087 | SPG20     | 0.56 | NM_000728 | CALCB       | 0.56 |
| NM_004569 | PIGH      | 0.56 | NM_002437 | MPV17       | 0.56 |
| NM_032501 | ACAS2L    | 0.56 | NM_005061 | RPL3L       | 0.56 |
| NM_003537 | HIST1H3B  | 0.56 | NM_004189 | SOX14       | 0.56 |
| NM_006775 | QKI       | 0.56 | NM_016106 | SCFD1       | 0.56 |
| NM_012266 | DNAJB5    | 0.56 | NM_019051 | MRPL50      | 0.56 |
| NM_016298 | FBXO40    | 0.56 | NM_019087 | ARFRP2      | 0.56 |
| NM_024018 | BTN2A3    | 0.56 | NM_018198 | DNAJC11     | 0.56 |
| NM_018369 | DEPDC1B   | 0.56 | NM_020631 | KIAA0720    | 0.56 |
| NM_022097 | LOC63928  | 0.56 | NM_024036 | LRFN4       | 0.56 |
| NM_024072 | DDX54     | 0.56 | NM_024669 | FLJ11795    | 0.56 |
| XM_290972 | FLJ12747  | 0.56 | NM_052972 | LRG1        | 0.56 |
| NM_053053 | STAF42    | 0.56 | NM_178507 | NS5ATP13TP2 | 0.56 |
| XM_378763 | LOC284240 | 0.56 | NM_181686 | KRTAP12-1   | 0.56 |
| XM_371132 | FLJ38144  | 0.56 | XM_211089 | LOC283586   | 0.56 |
| XM_294775 | LOC339022 | 0.56 | XM_173063 | LOC253662   | 0.56 |
| XM_208203 | LOC284428 | 0.56 | XM_071201 | LOC138972   | 0.56 |
| XM_114621 | LOC203076 | 0.56 | XM_114987 | LOC196120   | 0.56 |
| XM_376150 | LOC401016 | 0.56 | XM_379467 | LOC401296   | 0.56 |
| XM_374190 | LOC389442 | 0.56 | XM_380072 | LOC402716   | 0.56 |
| XM_373606 | LOC388011 | 0.56 | XM_373547 | LOC387885   | 0.56 |
| XM_373628 | LOC388123 | 0.56 | XM_378751 | LOC400654   | 0.56 |
| XM_372255 | LOC389895 | 0.56 | NM_001433 | ERN1        | 0.57 |
| NM_002765 | PRPS2     | 0.57 | NM_005279 | GPR1        | 0.57 |
| NM_003483 | HMGA2     | 0.57 | NM_031437 | RASSF5      | 0.57 |

|           |           |      |           |           |      |
|-----------|-----------|------|-----------|-----------|------|
| NM_002499 | NEO1      | 0.57 | NM_004723 | ARHGEF2   | 0.57 |
| NM_014409 | TAF5L     | 0.57 | NM_001871 | CPB1      | 0.57 |
| NM_000204 | IF        | 0.57 | NM_001308 | CPN1      | 0.57 |
| NM_002713 | PPP1R8    | 0.57 | NM_005474 | HDAC5     | 0.57 |
| NM_031457 | MS4A8B    | 0.57 | NM_002616 | PER1      | 0.57 |
| NM_133445 | GRIN3A    | 0.57 | NM_002204 | ITGA3     | 0.57 |
| NM_001562 | IL18      | 0.57 | NM_001858 | COL19A1   | 0.57 |
| NM_001738 | CA1       | 0.57 | NM_006208 | ENPP1     | 0.57 |
| NM_001550 | IFRD1     | 0.57 | NM_013376 | SERTAD1   | 0.57 |
| NM_012103 | AUP1      | 0.57 | NM_005382 | NEF3      | 0.57 |
| NM_031888 | PMCHL2    | 0.57 | NM_005089 | U2AF1L2   | 0.57 |
| NM_003566 | EEA1      | 0.57 | NM_005729 | PPIF      | 0.57 |
| NM_005804 | DDX39     | 0.57 | NM_007067 | MYST2     | 0.57 |
| NM_007175 | C8ORF2    | 0.57 | NM_014300 | SPC18     | 0.57 |
| XM_085127 | PLEKHG3   | 0.57 | NM_020843 | ZNF291    | 0.57 |
| NM_016589 | C3ORF1    | 0.57 | NM_017699 | FLJ20174  | 0.57 |
| NM_018361 | LPAAT-E   | 0.57 | NM_017864 | FLJ20530  | 0.57 |
| NM_018706 | DHTKD1    | 0.57 | NM_020338 | RAI17     | 0.57 |
| NM_198066 | GNPNAT1   | 0.57 | NM_025187 | LIN10     | 0.57 |
| NM_032194 | BXDC1     | 0.57 | NM_032031 | FKSG17    | 0.57 |
| NM_032411 | ECRG4     | 0.57 | NM_032606 | CAPS2     | 0.57 |
| NM_032829 | FLJ14721  | 0.57 | NM_032517 | LYZL1     | 0.57 |
| XM_370765 | PAPLN     | 0.57 | NM_138375 | CABLES1   | 0.57 |
| NM_138401 | LOC93343  | 0.57 | XM_378780 | LOC126536 | 0.57 |
| NM_152454 | FLJ31461  | 0.57 | NM_198990 | NAPE-PLD  | 0.57 |
| XM_171060 | ZNF620    | 0.57 | NM_173083 | TGS       | 0.57 |
| NM_182609 | MGC48625  | 0.57 | NM_199175 | C21ORF123 | 0.57 |
| NM_207506 | FLJ39458  | 0.57 | XM_171490 | LOC256148 | 0.57 |
| XM_291770 | LOC340913 | 0.57 | XM_045705 | ATXN3L    | 0.57 |
| XM_378898 | LOC400782 | 0.57 | XM_372953 | LOC391428 | 0.57 |
| XM_379306 | LOC401169 | 0.57 | XM_377296 | LOC401732 | 0.57 |
| XM_378795 | LOC400685 | 0.57 | NM_000681 | ADRA2A    | 0.58 |
| NM_000863 | HTR1B     | 0.58 | NM_001623 | AIF1      | 0.58 |
| NM_005570 | LMAN1     | 0.58 | NM_018952 | HOXB6     | 0.58 |
| NM_022569 | NDST4     | 0.58 | NM_002435 | MPI       | 0.58 |
| NM_002617 | PEX10     | 0.58 | NM_000230 | LEP       | 0.58 |
| NM_005121 | THRAP1    | 0.58 | NM_003289 | TPM2      | 0.58 |
| NM_001039 | SCNN1G    | 0.58 | NM_004849 | APG5L     | 0.58 |
| NM_005900 | SMAD1     | 0.58 | NM_032545 | CFC1      | 0.58 |
| NM_024318 | ILT8      | 0.58 | NM_152891 | EOS       | 0.58 |
| NM_016534 | FLJ39616  | 0.58 | NM_000226 | KRT9      | 0.58 |
| XM_370880 | MESDC2    | 0.58 | NM_000862 | HSD3B1    | 0.58 |
| NM_014363 | SACS      | 0.58 | NM_014483 | RBMS3     | 0.58 |
| NM_005172 | ATOH1     | 0.58 | NM_002113 | HFL1      | 0.58 |
| NM_174934 | SCN4B     | 0.58 | NM_003741 | CHRD      | 0.58 |
| XM_374983 | KIAA0748  | 0.58 | NM_006587 | CORIN     | 0.58 |

|           |           |      |           |               |      |
|-----------|-----------|------|-----------|---------------|------|
| NM_007225 | NXPH3     | 0.58 | NM_007028 | TRIM31        | 0.58 |
| XM_370931 | OR1F2P    | 0.58 | NM_024705 | FLJ13639      | 0.58 |
| NM_024707 | GEMIN7    | 0.58 | NM_024657 | ZCWCC2        | 0.58 |
| NM_024778 | RNF127    | 0.58 | NM_024320 | MGC11242      | 0.58 |
| NM_032800 | FLJ14525  | 0.58 | NM_032357 | MGC12981      | 0.58 |
| XM_376763 | COE2      | 0.58 | NM_080820 | HARS2         | 0.58 |
| NM_153209 | FLJ37300  | 0.58 | XM_375838 | LOC128387     | 0.58 |
| NM_152482 | C19ORF25  | 0.58 | NM_153695 | ZNF367        | 0.58 |
| XM_378355 | LOC283332 | 0.58 | NM_173820 | FLJ35487      | 0.58 |
| XM_088726 | LOC158957 | 0.58 | XM_066859 | LOC139735     | 0.58 |
| XM_372922 | LOC391359 | 0.58 | XM_373596 | LOC387994     | 0.58 |
| XM_378678 | LOC400600 | 0.58 | XM_375664 | LOC400721     | 0.58 |
| XM_372607 | LOC390667 | 0.58 | XM_373353 | LOC392486     | 0.58 |
| XM_371416 | LOC388828 | 0.58 | NM_001222 | CAMK2G        | 0.59 |
| NM_005400 | PRKCE     | 0.59 | NM_024531 | FLJ11856      | 0.59 |
| NM_005064 | CCL23     | 0.59 | NM_005306 | GPR43         | 0.59 |
| NM_138448 | ACYP2     | 0.59 | NM_005130 | HBP17         | 0.59 |
| NM_014970 | KIFAP3    | 0.59 | NM_018936 | PCDHB2        | 0.59 |
| NM_145295 | ZNF627    | 0.59 | NM_003426 | ZNF74         | 0.59 |
| NM_001417 | EIF4B     | 0.59 | NM_006330 | LYPLA1        | 0.59 |
| NM_005139 | ANXA3     | 0.59 | NM_000492 | CFTR          | 0.59 |
| NM_003256 | TIMP4     | 0.59 | NM_004715 | CTDP1         | 0.59 |
| NM_004558 | NRTN      | 0.59 | NM_017934 | PHIP          | 0.59 |
| NM_003664 | AP3B1     | 0.59 | NM_007163 | SLC14A2       | 0.59 |
| NM_030943 | AMN       | 0.59 | NM_002310 | LIFR          | 0.59 |
| NM_144672 | OTOA      | 0.59 | NM_006396 | SSSCA1        | 0.59 |
| NM_001130 | AES       | 0.59 | NM_014205 | C11ORF5       | 0.59 |
| NM_030893 | CD1E      | 0.59 | NM_005217 | DEFA3         | 0.59 |
| NM_003438 | ZNF137    | 0.59 | NM_003147 | SSX2          | 0.59 |
| NM_007156 | ZXDA      | 0.59 | NM_004733 | SLC33A1       | 0.59 |
| NM_007056 | SFRS16    | 0.59 | NM_007282 | RNF13         | 0.59 |
| NM_013283 | MAT2B     | 0.59 | NM_018478 | C20ORF35      | 0.59 |
| XM_371590 | KIAA1571  | 0.59 | NM_021828 | HPSE2         | 0.59 |
| NM_024042 | C16ORF23  | 0.59 | NM_024630 | ZDHHC14       | 0.59 |
| NM_024803 | TUBAL3    | 0.59 | NM_031292 | DKFZP434G1415 | 0.59 |
| NM_032356 | MGC14151  | 0.59 | NM_033543 | R29124_1      | 0.59 |
| NM_138383 | LOC92154  | 0.59 | NM_153206 | AMICA         | 0.59 |
| NM_153046 | TDRD9     | 0.59 | XM_070277 | OC90          | 0.59 |
| NM_152435 | MGC35366  | 0.59 | NM_080676 | C20ORF133     | 0.59 |
| NM_139167 | SGCZ      | 0.59 | NM_080828 | C20ORF173     | 0.59 |
| NM_014261 | TRIF      | 0.59 | NM_152484 | ZNF569        | 0.59 |
| NM_178823 | C6ORF165  | 0.59 | XM_379183 | LOC152024     | 0.59 |
| XM_054313 | LOC155100 | 0.59 | NM_152559 | WBSCR27       | 0.59 |
| XM_376631 | WBSCR24   | 0.59 | NM_178495 | KIAA1754L     | 0.59 |
| XM_290597 | LOC283464 | 0.59 | XM_209579 | LOC285346     | 0.59 |
| XM_378791 | LOC339316 | 0.59 | NM_203407 | LOC340602     | 0.59 |

|           |           |      |              |           |      |
|-----------|-----------|------|--------------|-----------|------|
| NM_181789 | COLM      | 0.59 | NM_178536    | LCN12     | 0.59 |
| NM_198562 | FLJ43654  | 0.59 | NM_203393    | LOC389458 | 0.59 |
| NM_015680 | C2ORF24   | 0.59 | XM_292963    | LOC344178 | 0.59 |
| XM_291989 | LOC338756 | 0.59 | XM_373093    | LOC391809 | 0.59 |
| XM_372013 | LOC389611 | 0.59 | XM_378643    | LOC400568 | 0.59 |
| NM_001106 | ACVR2B    | 0.6  | NM_001123    | ADK       | 0.6  |
| NM_004304 | ALK       | 0.6  | NM_003936    | CDK5R2    | 0.6  |
| NM_000858 | GUK1      | 0.6  | NM_024927    | FLJ21019  | 0.6  |
| NM_003736 | PCDHGB4   | 0.6  | NM_004684    | SPARCL1   | 0.6  |
| NM_005924 | MEOX2     | 0.6  | NM_000017    | ACADS     | 0.6  |
| NM_003756 | EIF3S3    | 0.6  | NM_000411    | HLCS      | 0.6  |
| NM_000498 | CYP11B2   | 0.6  | NM_002876    | RAD51C    | 0.6  |
| NM_004088 | DNTT      | 0.6  | NM_006506    | RASA2     | 0.6  |
| NM_005648 | TCEB1     | 0.6  | NM_000829    | GRIA4     | 0.6  |
| NM_004115 | FGF14     | 0.6  | NM_006536    | CLCA2     | 0.6  |
| NM_004556 | NFKBIE    | 0.6  | NM_020403    | PCDH9     | 0.6  |
| NM_005058 | RBMY1A1   | 0.6  | NM_000613    | HPX       | 0.6  |
| NM_002056 | GFPT1     | 0.6  | NM_006200    | PCSK5     | 0.6  |
| NM_138468 | ALS2CR15  | 0.6  | NM_003863    | DPM2      | 0.6  |
| NM_014701 | KIAA0256  | 0.6  | NM_013384    | LASS2     | 0.6  |
| NM_014283 | C1ORF9    | 0.6  | NM_018184    | ARL10C    | 0.6  |
| NM_018199 | C14ORF114 | 0.6  | NM_018639    | WSB2      | 0.6  |
| NM_019596 | C21ORF62  | 0.6  | NM_018922    | PCDHGB1   | 0.6  |
| NM_021238 | C12ORF14  | 0.6  | NM_022837    | FLJ22833  | 0.6  |
| NM_024626 | B7-H4     | 0.6  | NM_024579    | FLJ23221  | 0.6  |
| NM_023938 | SARG      | 0.6  | NM_030895    | FLJ14129  | 0.6  |
| NM_025235 | TNKS2     | 0.6  | XM_088376    | C8ORF7    | 0.6  |
| NM_032730 | RTN4IP1   | 0.6  | NM_033109    | PNPT1     | 0.6  |
| NM_138447 | LOC115509 | 0.6  | NM_138386    | LOC92345  | 0.6  |
| NM_199459 | C10ORF71  | 0.6  | NM_178451    | ZMYND17   | 0.6  |
| NM_144671 | FLJ32356  | 0.6  | NM_152443    | RDH12     | 0.6  |
| NM_144665 | SESN3     | 0.6  | NM_138819    | LOC159091 | 0.6  |
| NM_152890 | COL24A1   | 0.6  | NM_152773    | MGC33212  | 0.6  |
| XM_378455 | LOC283551 | 0.6  | XM_376727    | LOC285888 | 0.6  |
| XM_291339 | SATL1     | 0.6  | XM_291394    | LOC343068 | 0.6  |
| NM_198566 | FLJ32363  | 0.6  | XM_088677    | LOC158796 | 0.6  |
| XM_294353 | LOC340344 | 0.6  | XM_379112    | LOC400988 | 0.6  |
| XM_371697 | LOC389211 | 0.6  | XM_373224    | LOC392164 | 0.6  |
| XM_376602 | LOC401331 | 0.6  | XM_379395    | LOC401234 | 0.6  |
| XM_378653 | LOC400577 | 0.6  | NM_001004327 | FLJ42258  | 0.6  |
| XM_377033 | LOC401611 | 0.6  | NM_001005222 | OR52A4    | 0.6  |
| XM_037430 | DUSP7     | 0.61 | NM_003821    | RIPK2     | 0.61 |
| NM_002073 | GNAZ      | 0.61 | NM_057163    | GNRHR2    | 0.61 |
| NM_000861 | HRH1      | 0.61 | NM_000870    | HTR4      | 0.61 |
| NM_012402 | ARFIP2    | 0.61 | NM_004281    | BAG3      | 0.61 |
| NM_004348 | RUNX2     | 0.61 | NM_016246    | DHRS10    | 0.61 |



|              |              |      |           |           |      |
|--------------|--------------|------|-----------|-----------|------|
| NM_003372    | VBP1         | 0.61 | NM_032525 | MGC4083   | 0.61 |
| NM_032019    | HDAC10       | 0.61 | NM_020816 | KIF17     | 0.61 |
| NM_000238    | KCNH2        | 0.61 | NM_020525 | IL22      | 0.61 |
| NM_000207    | INS          | 0.61 | NM_001939 | DRP2      | 0.61 |
| NM_005549    | KCNA10       | 0.61 | NM_003759 | SLC4A4    | 0.61 |
| NM_033028    | BBS4         | 0.61 | NM_004331 | BNIP3L    | 0.61 |
| NM_005267    | GJA8         | 0.61 | NM_006117 | PECI      | 0.61 |
| NM_019035    | PCDH18       | 0.61 | NM_002962 | S100A5    | 0.61 |
| NM_005366    | MAGEA11      | 0.61 | NM_002666 | PLIN      | 0.61 |
| NM_033046    | RTKN         | 0.61 | NM_021920 | SCT       | 0.61 |
| XM_375469    | PROSAPI2     | 0.61 | NM_014759 | PHYHIP    | 0.61 |
| NM_007214    | SEC63        | 0.61 | NM_012216 | MID2      | 0.61 |
| NM_015484    | P29          | 0.61 | NM_014044 | UNC50     | 0.61 |
| NM_014547    | TMOD3        | 0.61 | NM_022046 | KLK14     | 0.61 |
| NM_016495    | TBC1D7       | 0.61 | NM_014601 | EHD2      | 0.61 |
| NM_017755    | FLJ20303     | 0.61 | NM_018008 | FEZL      | 0.61 |
| NM_018166    | FLJ10647     | 0.61 | NM_018470 | C10ORF110 | 0.61 |
| NM_019103    | LOC55954     | 0.61 | NM_020424 | LOC57149  | 0.61 |
| NM_020134    | DPYSL5       | 0.61 | NM_020860 | STIM2     | 0.61 |
| NM_024897    | PAQR6        | 0.61 | NM_031905 | SVH       | 0.61 |
| NM_052955    | TGM7         | 0.61 | NM_153697 | LOC91526  | 0.61 |
| NM_145255    | MRPL10       | 0.61 | NM_138805 | FAM3D     | 0.61 |
| NM_205545    | UNQ430       | 0.61 | NM_183387 | EML5      | 0.61 |
| NM_152719    | NURIT        | 0.61 | NM_153271 | MGC32065  | 0.61 |
| NM_173664    | ARL10A       | 0.61 | XM_291947 | LOC341208 | 0.61 |
| XM_378824    | LOC400729    | 0.61 | XM_373984 | LOC388947 | 0.61 |
| XM_376681    | LOC401409    | 0.61 | XM_379255 | LOC401119 | 0.61 |
| XM_375081    | LOC400214    | 0.61 | XM_374352 | LOC390367 | 0.61 |
| XM_372366    | LOC390078    | 0.61 | XM_370728 | LOC387933 | 0.61 |
| NM_001004325 | KRTAP5-2     | 0.61 | NM_030760 | EDG8      | 0.62 |
| NM_006296    | VRK2         | 0.62 | NM_000579 | CCR5      | 0.62 |
| NM_002929    | GRK1         | 0.62 | NM_004108 | FCN2      | 0.62 |
| NM_020369    | FSCN3        | 0.62 | NM_018200 | HMG20A    | 0.62 |
| NM_003193    | TBCE         | 0.62 | NM_032828 | ZNF587    | 0.62 |
| NM_017999    | RNF31        | 0.62 | NM_020429 | SMURF1    | 0.62 |
| NM_000589    | IL4          | 0.62 | NM_000288 | PEX7      | 0.62 |
| NM_054020    | CATSPER2     | 0.62 | NM_053054 | CATSPER1  | 0.62 |
| NM_000086    | CLN3         | 0.62 | XM_370908 | MGC14386  | 0.62 |
| NM_002496    | NDUFS8       | 0.62 | NM_003806 | HRK       | 0.62 |
| NM_001548    | IFIT1        | 0.62 | NM_002868 | RAB5B     | 0.62 |
| NM_013435    | RAX          | 0.62 | NM_007235 | XPOT      | 0.62 |
| NM_001212    | C1QBP        | 0.62 | NM_020995 | HPR       | 0.62 |
| NM_004211    | SLC6A5       | 0.62 | NM_006461 | SPAG5     | 0.62 |
| NM_015113    | ZZEF1        | 0.62 | NM_015528 | RNF167    | 0.62 |
| NM_015407    | DKFZP564O243 | 0.62 | NM_015411 | SUMF2     | 0.62 |
| NM_013369    | DNMT3L       | 0.62 | NM_016545 | IER5      | 0.62 |

|              |           |      |           |           |      |
|--------------|-----------|------|-----------|-----------|------|
| NM_018069    | FLJ10352  | 0.62 | NM_018077 | RBM28     | 0.62 |
| NM_017803    | FLJ20399  | 0.62 | NM_017682 | VMD2L1    | 0.62 |
| NM_020367    | PARP11    | 0.62 | NM_020836 | KIAA1446  | 0.62 |
| NM_024667    | FLJ12750  | 0.62 | NM_025009 | FLJ13621  | 0.62 |
| NM_052842    | BCL2L12   | 0.62 | NM_033069 | C6ORF114  | 0.62 |
| XM_370967    | LOC124411 | 0.62 | NM_152376 | UBXD3     | 0.62 |
| NM_203463    | LASS6     | 0.62 | XM_378756 | LOC284274 | 0.62 |
| NM_181655    | LOC284018 | 0.62 | NM_198483 | FLJ46536  | 0.62 |
| NM_173362    | LOC317671 | 0.62 | NM_178562 | MGC50844  | 0.62 |
| NM_153614    | TSARG6    | 0.62 | XM_098163 | LOC152118 | 0.62 |
| XM_372842    | LOC391211 | 0.62 | XM_372755 | LOC390988 | 0.62 |
| XM_373876    | LOC388716 | 0.62 | XM_376233 | LOC401067 | 0.62 |
| XM_374010    | LOC389033 | 0.62 | XM_373611 | LOC388019 | 0.62 |
| XM_372553    | LOC390547 | 0.62 | XM_373811 | LOC388563 | 0.62 |
| XM_372719    | LOC390906 | 0.62 | XM_378982 | LOC400847 | 0.62 |
| NM_001005277 | OR4F16    | 0.62 | NM_003900 | SQSTM1    | 0.63 |
| NM_001981    | EPS15     | 0.63 | NM_014321 | ORC6L     | 0.63 |
| NM_020831    | MKL1      | 0.63 | NM_000249 | MLH1      | 0.63 |
| NM_021168    | RAB40C    | 0.63 | NM_003881 | WISP2     | 0.63 |
| NM_006618    | JARID1B   | 0.63 | NM_022357 | DPEP3     | 0.63 |
| NM_025098    | MOGAT2    | 0.63 | U25801    | TAX1BP2   | 0.63 |
| NM_003213    | TEAD4     | 0.63 | NM_002866 | RAB3A     | 0.63 |
| NM_014495    | ANGPTL3   | 0.63 | NM_004591 | CCL20     | 0.63 |
| NM_000415    | IAPP      | 0.63 | NM_002674 | PMCH      | 0.63 |
| NM_001282    | AP2B1     | 0.63 | NM_004924 | ACTN4     | 0.63 |
| NM_000452    | SLC10A2   | 0.63 | NM_014379 | KCNV1     | 0.63 |
| NM_139056    | ADAMTS16  | 0.63 | NM_000039 | APOA1     | 0.63 |
| NM_002518    | NPAS2     | 0.63 | NM_021034 | IFITM3    | 0.63 |
| NM_003932    | ST13      | 0.63 | NM_004578 | RAB4A     | 0.63 |
| NM_152323    | SPIC      | 0.63 | NM_004342 | CALD1     | 0.63 |
| NM_006929    | SKIV2L    | 0.63 | NM_013250 | ZNF215    | 0.63 |
| NM_006778    | TRIM10    | 0.63 | XM_027105 | KIAA0767  | 0.63 |
| XM_039828    | DNAJC13   | 0.63 | NM_016071 | MRPS33    | 0.63 |
| NM_024935    | KIAA1772  | 0.63 | NM_032865 | CTEN      | 0.63 |
| NM_032374    | C14ORF153 | 0.63 | XM_030445 | C10ORF75  | 0.63 |
| NM_144641    | FLJ32332  | 0.63 | NM_152464 | MGC45714  | 0.63 |
| XM_379456    | LOC154222 | 0.63 | NM_152524 | SGOL2     | 0.63 |
| NM_152705    | MGC9850   | 0.63 | NM_145007 | NALP11    | 0.63 |
| NM_178161    | PTF1A     | 0.63 | XM_375185 | FMN       | 0.63 |
| NM_198584    | CA13      | 0.63 | NM_182621 | MGC52498  | 0.63 |
| XM_293177    | LOC343717 | 0.63 | XM_373850 | LOC388644 | 0.63 |
| XM_376072    | LOC400965 | 0.63 | XM_374038 | LOC389108 | 0.63 |
| XM_379141    | LOC401014 | 0.63 | XM_376888 | LOC401537 | 0.63 |
| XM_374766    | LOC399715 | 0.63 | XM_376010 | LOC400927 | 0.63 |
| NM_032037    | SSTK      | 0.64 | NM_000907 | NPR2      | 0.64 |
| NM_000868    | HTR2C     | 0.64 | NM_030959 | OR12D3    | 0.64 |

|           |           |      |           |           |      |
|-----------|-----------|------|-----------|-----------|------|
| NM_003888 | ALDH1A2   | 0.64 | NM_012398 | PIP5K1C   | 0.64 |
| NM_002046 | GAPDH     | 0.64 | NM_000133 | F9        | 0.64 |
| NM_015458 | MTMR9     | 0.64 | NM_015367 | BCL2L13   | 0.64 |
| NM_004590 | CCL16     | 0.64 | NM_006428 | MRPL28    | 0.64 |
| NM_000394 | CRYAA     | 0.64 | NM_022458 | C7ORF2    | 0.64 |
| NM_004352 | CBLN1     | 0.64 | NM_019098 | CNGB3     | 0.64 |
| NM_024908 | FLJ12973  | 0.64 | NM_000117 | EMD       | 0.64 |
| NM_004719 | SFRS2IP   | 0.64 | NM_002412 | MGMT      | 0.64 |
| NM_006275 | SFRS6     | 0.64 | NM_006766 | MYST3     | 0.64 |
| NM_013398 | ZNF224    | 0.64 | NM_004922 | SEC24C    | 0.64 |
| NM_005836 | HRSP12    | 0.64 | NM_014837 | C1ORF16   | 0.64 |
| NM_014253 | ODZ1      | 0.64 | NM_006345 | SLC30A9   | 0.64 |
| NM_006649 | UTP14A    | 0.64 | NM_145693 | LPIN1     | 0.64 |
| NM_015078 | MCF2L2    | 0.64 | NM_015391 | ANAPC13   | 0.64 |
| NM_015638 | TRPC4AP   | 0.64 | NM_014405 | CACNG4    | 0.64 |
| XM_290482 | FLJ10824  | 0.64 | NM_019120 | PCDHB8    | 0.64 |
| NM_022351 | EFCBP1    | 0.64 | NM_022087 | GALNT11   | 0.64 |
| NM_023008 | FLJ12949  | 0.64 | NM_022166 | XYLT1     | 0.64 |
| NM_024751 | FLJ13273  | 0.64 | NM_024572 | GALNT14   | 0.64 |
| NM_025145 | C10ORF79  | 0.64 | NM_025204 | PP2447    | 0.64 |
| NM_030980 | FLJ12671  | 0.64 | NM_032298 | SYT3      | 0.64 |
| NM_033117 | RBM18     | 0.64 | NM_033318 | LOC91689  | 0.64 |
| NM_145256 | LRRC25    | 0.64 | NM_144628 | C20ORF140 | 0.64 |
| NM_139171 | STARD6    | 0.64 | NM_152605 | FLJ37549  | 0.64 |
| NM_145019 | FLJ30707  | 0.64 | NM_198097 | C7ORF28B  | 0.64 |
| NM_178543 | ENPP7     | 0.64 | NM_203419 | LOC286016 | 0.64 |
| XM_045290 | LOC151579 | 0.64 | XM_059399 | LOC130106 | 0.64 |
| XM_212326 | LOC286478 | 0.64 | XM_371496 | LOC388955 | 0.64 |
| XM_379268 | LOC401135 | 0.64 | XM_378413 | LOC400128 | 0.64 |
| XM_371070 | LOC388403 | 0.64 | XM_371430 | LOC388853 | 0.64 |
| NM_025052 | FLJ23074  | 0.65 | NM_000269 | NME1      | 0.65 |
| NM_003804 | RIPK1     | 0.65 | NM_004066 | CETN1     | 0.65 |
| NM_052876 | BTBD14B   | 0.65 | NM_001552 | IGFBP4    | 0.65 |
| NM_005197 | CHES1     | 0.65 | NM_003593 | FOXN1     | 0.65 |
| NM_023001 | ARID4A    | 0.65 | NM_007255 | B4GALT7   | 0.65 |
| NM_001091 | ABP1      | 0.65 | NM_007005 | TLE4      | 0.65 |
| NM_000483 | APOC2     | 0.65 | NM_003253 | TIAM1     | 0.65 |
| NM_052932 | PORIMIN   | 0.65 | NM_002558 | P2RX1     | 0.65 |
| XM_043106 | KCNS2     | 0.65 | NM_001849 | COL6A2    | 0.65 |
| NM_000386 | BLMH      | 0.65 | NM_001831 | CLU       | 0.65 |
| NM_018291 | FLJ10986  | 0.65 | NM_014997 | KIAA0265  | 0.65 |
| NM_004319 | ASTN      | 0.65 | NM_005365 | MAGEA9    | 0.65 |
| NM_002785 | PSG11     | 0.65 | NM_014228 | SLC6A7    | 0.65 |
| NM_001008 | RPS4Y1    | 0.65 | NM_005051 | QARS      | 0.65 |
| NM_001879 | MASP1     | 0.65 | NM_003098 | SNTA1     | 0.65 |
| NM_003747 | TNKS      | 0.65 | NM_014819 | PJA2      | 0.65 |

|              |               |      |              |               |      |
|--------------|---------------|------|--------------|---------------|------|
| XM_048786    | FSTL4         | 0.65 | NM_012337    | NESG1         | 0.65 |
| NM_014450    | SIT           | 0.65 | NM_025238    | BTBD1         | 0.65 |
| NM_017887    | FLJ20580      | 0.65 | NM_018143    | KLHL11        | 0.65 |
| NM_018290    | PGM2          | 0.65 | NM_021178    | CCNB1IP1      | 0.65 |
| NM_032547    | SCOC          | 0.65 | NM_021939    | FKBP10        | 0.65 |
| NM_024819    | FLJ22955      | 0.65 | NM_024917    | FLJ12687      | 0.65 |
| NM_031491    | RBP5          | 0.65 | NM_032289    | DKFZP761B0514 | 0.65 |
| NM_194325    | ZNF30         | 0.65 | NM_080660    | MGC14289      | 0.65 |
| NM_144636    | CHCHD4        | 0.65 | NM_181533    | C14ORF29      | 0.65 |
| NM_144679    | FLJ31528      | 0.65 | NM_178835    | LOC152485     | 0.65 |
| NM_133267    | GSH-2         | 0.65 | NM_153711    | C6ORF188      | 0.65 |
| XM_378794    | LOC284402     | 0.65 | NM_181809    | BMP8A         | 0.65 |
| NM_004313    | ARRB2         | 0.65 | XM_170777    | LOC255320     | 0.65 |
| XM_059492    | LOC131076     | 0.65 | XM_115100    | LOC196346     | 0.65 |
| XM_067076    | LOC140103     | 0.65 | XM_371738    | LOC389289     | 0.65 |
| XM_372163    | LOC389819     | 0.65 | XM_371949    | LOC389550     | 0.65 |
| XM_372432    | LOC390256     | 0.65 | NM_001001325 | SPINK5L2      | 0.65 |
| NM_001003807 | FLJ35429      | 0.65 | NM_000076    | CDKN1C        | 0.66 |
| NM_030662    | MAP2K2        | 0.66 | NM_001727    | BRS3          | 0.66 |
| NM_000164    | GIPR          | 0.66 | NM_004362    | CLGN          | 0.66 |
| NM_001743    | CALM2         | 0.66 | NM_006570    | RRAGA         | 0.66 |
| NM_004289    | NFE2L3        | 0.66 | NM_003187    | TAF9          | 0.66 |
| NM_002103    | GYS1          | 0.66 | NM_012214    | MGAT4A        | 0.66 |
| NM_002772    | PRSS7         | 0.66 | NM_000123    | ERCC5         | 0.66 |
| NM_006380    | APPBP2        | 0.66 | NM_000264    | PTCH          | 0.66 |
| NM_004931    | CD8B1         | 0.66 | NM_014251    | SLC25A13      | 0.66 |
| NM_001150    | ANPEP         | 0.66 | NM_006516    | SLC2A1        | 0.66 |
| NM_005214    | CTLA4         | 0.66 | NM_006806    | BTG3          | 0.66 |
| NM_016247    | IMPG2         | 0.66 | NM_004508    | IDI1          | 0.66 |
| NM_000317    | PTS           | 0.66 | NM_014633    | SH2BP1        | 0.66 |
| NM_006682    | FGL2          | 0.66 | NM_015066    | TRIM35        | 0.66 |
| NM_015172    | XTP2          | 0.66 | NM_173630    | RTTN          | 0.66 |
| NM_012196    | GAGE8         | 0.66 | NM_021161    | KCNK10        | 0.66 |
| NM_016410    | C9ORF83       | 0.66 | NM_017866    | FLJ20533      | 0.66 |
| NM_018228    | C14ORF115     | 0.66 | NM_018399    | VNN3          | 0.66 |
| NM_020158    | EXOSC5        | 0.66 | NM_020359    | PLSCR2        | 0.66 |
| NM_020769    | KIAA1318      | 0.66 | NM_024618    | NOD9          | 0.66 |
| NM_024821    | FLJ22349      | 0.66 | NM_032120    | DKFZP564O0523 | 0.66 |
| NM_138350    | MGC33488      | 0.66 | NM_052846    | EMILIN3       | 0.66 |
| XM_371760    | LOC116068     | 0.66 | NM_138371    | MGC16044      | 0.66 |
| NM_133446    | CTGLF1        | 0.66 | NM_153346    | CXORF20       | 0.66 |
| NM_194285    | FLJ39441      | 0.66 | NM_145036    | MGC33887      | 0.66 |
| NM_152898    | FERD3L        | 0.66 | NM_174932    | BPIL2         | 0.66 |
| XM_379438    | LOC285740     | 0.66 | XM_209509    | LOC285193     | 0.66 |
| NM_178542    | DKFZP762C2414 | 0.66 | NM_199290    | MGC71999      | 0.66 |
| NM_181506    | SLRN          | 0.66 | NM_207480    | UNQ5830       | 0.66 |

|           |           |      |           |           |      |
|-----------|-----------|------|-----------|-----------|------|
| XM_064003 | LOC124149 | 0.66 | XM_291139 | LOC340075 | 0.66 |
| XM_373886 | LOC388738 | 0.66 | XM_373873 | LOC388713 | 0.66 |
| XM_376488 | LOC401252 | 0.66 | XM_374222 | LOC389526 | 0.66 |
| XM_379516 | LOC401398 | 0.66 | XM_373470 | LOC387705 | 0.66 |
| XM_374741 | LOC392749 | 0.66 | NM_001346 | DGKG      | 0.67 |
| NM_000064 | C3        | 0.67 | NM_001784 | CD97      | 0.67 |
| NM_005285 | GPR7      | 0.67 | NM_005716 | RGS19IP1  | 0.67 |
| NM_000615 | NCAM1     | 0.67 | NM_012294 | RAPGEF5   | 0.67 |
| NM_000380 | XPA       | 0.67 | NM_003670 | BHLHB2    | 0.67 |
| NM_006084 | ISGF3G    | 0.67 | NM_007249 | KLF12     | 0.67 |
| NM_022164 | LCN7      | 0.67 | NM_000305 | PON2      | 0.67 |
| NM_006670 | TPBG      | 0.67 | NM_004665 | VNN2      | 0.67 |
| NM_005993 | TBCD      | 0.67 | NM_000301 | PLG       | 0.67 |
| NM_002939 | RNH       | 0.67 | NM_005393 | PLXNB3    | 0.67 |
| NM_080611 | DUSP15    | 0.67 | NM_020387 | RAB25     | 0.67 |
| NM_000617 | SLC11A2   | 0.67 | NM_002237 | KCNG1     | 0.67 |
| NM_002297 | LCN1      | 0.67 | NM_175069 | APTX      | 0.67 |
| NM_015722 | DRD1IP    | 0.67 | NM_017649 | CNNM2     | 0.67 |
| NM_007283 | MGLL      | 0.67 | NM_004283 | RAB3D     | 0.67 |
| NM_001970 | EIF5A     | 0.67 | NM_005014 | OMD       | 0.67 |
| NM_007103 | NDUFV1    | 0.67 | NM_003127 | SPTAN1    | 0.67 |
| NM_003764 | STX11     | 0.67 | NM_004265 | FADS2     | 0.67 |
| NM_004845 | PCYT1B    | 0.67 | NM_003850 | SUCLA2    | 0.67 |
| NM_005156 | ROD1      | 0.67 | NM_014834 | KIAA0563  | 0.67 |
| NM_006566 | CD226     | 0.67 | NM_152740 | HIBADH    | 0.67 |
| NM_007347 | AP4E1     | 0.67 | NM_013327 | PARVB     | 0.67 |
| NM_014600 | EHD3      | 0.67 | NM_018009 | TAPBPL    | 0.67 |
| NM_019592 | RNF20     | 0.67 | NM_020812 | DOCK6     | 0.67 |
| NM_021167 | ODAG      | 0.67 | NM_022123 | NPAS3     | 0.67 |
| NM_022140 | EPB41L4A  | 0.67 | NM_024653 | PRKRIP1   | 0.67 |
| NM_024689 | FLJ14103  | 0.67 | NM_030571 | NDFIP1    | 0.67 |
| NM_025045 | FLJ22582  | 0.67 | XM_040383 | KLHL15    | 0.67 |
| NM_025222 | PRO2730   | 0.67 | NM_032145 | FBXO30    | 0.67 |
| XM_290737 | ZNF594    | 0.67 | NM_178448 | C9ORF140  | 0.67 |
| NM_138567 | SYT8      | 0.67 | NM_032160 | C18ORF4   | 0.67 |
| NM_138783 | LOC115950 | 0.67 | NM_138442 | LOC115098 | 0.67 |
| NM_175056 | LOC131368 | 0.67 | NM_173481 | C19ORF21  | 0.67 |
| NM_152398 | MGC45416  | 0.67 | XM_378487 | LOC145216 | 0.67 |
| NM_130388 | ASB12     | 0.67 | NM_052867 | VGCNL1    | 0.67 |
| XM_379207 | LOC285194 | 0.67 | XM_291063 | LOC339903 | 0.67 |
| XM_379254 | LOC339988 | 0.67 | NM_198560 | LOC375323 | 0.67 |
| NM_182974 | GLTDC1    | 0.67 | XM_113825 | LOC197135 | 0.67 |
| XM_114301 | LOC200810 | 0.67 | XM_065828 | LOC130678 | 0.67 |
| XM_059047 | LOC126435 | 0.67 | XM_084377 | LOC142910 | 0.67 |
| XM_291763 | LOC340947 | 0.67 | XM_373057 | LOC391745 | 0.67 |
| XM_379493 | LOC401352 | 0.67 | XM_374186 | LOC389438 | 0.67 |

|              |           |      |              |           |      |
|--------------|-----------|------|--------------|-----------|------|
| XM_370603    | LOC387745 | 0.67 | XM_373723    | LOC388365 | 0.67 |
| XM_378738    | LOC400643 | 0.67 | XM_371006    | LOC388323 | 0.67 |
| NM_001002923 | IGFL4     | 0.67 | NM_001005338 | OR5H1     | 0.67 |
| NM_023018    | FLJ13052  | 0.68 | NM_002733    | PRKAG1    | 0.68 |
| NM_001504    | CXCR3     | 0.68 | NM_015191    | SIK2      | 0.68 |
| NM_000172    | GNAT1     | 0.68 | NM_000866    | HTR1F     | 0.68 |
| NM_004178    | TARBP2    | 0.68 | NM_000522    | HOXA13    | 0.68 |
| NM_000202    | IDS       | 0.68 | NM_003711    | PPAP2A    | 0.68 |
| NM_000667    | ADH1A     | 0.68 | NM_006377    | UNC13B    | 0.68 |
| XM_290793    | KSR       | 0.68 | NM_002317    | LOX       | 0.68 |
| NM_000360    | TH        | 0.68 | NM_001175    | ARHGDIB   | 0.68 |
| NM_003884    | PCAF      | 0.68 | NM_003255    | TIMP2     | 0.68 |
| NM_000573    | CR1       | 0.68 | NM_004625    | WNT7A     | 0.68 |
| NM_001242    | TNFRSF7   | 0.68 | NM_000814    | GABRB3    | 0.68 |
| NM_000361    | THBD      | 0.68 | NM_020236    | MRPL1     | 0.68 |
| NM_000095    | COMP      | 0.68 | NM_000713    | BLVRB     | 0.68 |
| NM_012139    | DELGEF    | 0.68 | NM_000457    | HNF4A     | 0.68 |
| NM_000194    | HPRT1     | 0.68 | NM_001140    | ALOX15    | 0.68 |
| NM_002100    | GYPB      | 0.68 | NM_005329    | HAS3      | 0.68 |
| NM_004499    | HNRPAB    | 0.68 | NM_006918    | SC5DL     | 0.68 |
| NM_006916    | RPE       | 0.68 | NM_003532    | HIST1H3E  | 0.68 |
| NM_006392    | NOL5A     | 0.68 | NM_015238    | KIBRA     | 0.68 |
| NM_016400    | HYPK      | 0.68 | NM_012260    | HPCL2     | 0.68 |
| NM_016433    | GLTP      | 0.68 | NM_016645    | NEUGRIN   | 0.68 |
| NM_018067    | FLJ10350  | 0.68 | NM_018657    | MYNN      | 0.68 |
| NM_018915    | PCDHGA2   | 0.68 | NM_022761    | C11ORF1   | 0.68 |
| NM_030935    | THG-1     | 0.68 | NM_018092    | NETO2     | 0.68 |
| NM_032389    | ZNF289    | 0.68 | NM_032775    | FLJ14360  | 0.68 |
| NM_033208    | TIGD7     | 0.68 | NM_152864    | C20ORF58  | 0.68 |
| NM_145808    | MTPN      | 0.68 | XM_379215    | LOC132241 | 0.68 |
| NM_152401    | PDCL2     | 0.68 | NM_178493    | LOC147111 | 0.68 |
| NM_207324    | LOC147650 | 0.68 | NM_178497    | FLJ23657  | 0.68 |
| NM_178504    | FLJ40427  | 0.68 | XM_114611    | KIAA1833  | 0.68 |
| XM_292982    | LOC344227 | 0.68 | XM_084467    | LOC143244 | 0.68 |
| XM_375849    | LOC400809 | 0.68 | XM_379523    | LOC401407 | 0.68 |
| XM_374405    | LOC392634 | 0.68 | XM_374271    | LOC389665 | 0.68 |
| XM_370711    | LOC387904 | 0.68 | XM_370724    | LOC387923 | 0.68 |
| NM_003886    | AKAP4     | 0.69 | NM_006285    | TESK1     | 0.69 |
| NM_003485    | GPR68     | 0.69 | NM_005290    | GPR15     | 0.69 |
| NM_001058    | TACR1     | 0.69 | NM_130897    | DNCL2B    | 0.69 |
| NM_006272    | S100B     | 0.69 | NM_017481    | UBQLN3    | 0.69 |
| NM_006907    | PYCR1     | 0.69 | NM_000920    | PC        | 0.69 |
| NM_018690    | APOB48R   | 0.69 | NM_003828    | MTMR1     | 0.69 |
| NM_018113    | LIMR      | 0.69 | NM_005398    | PPP1R3C   | 0.69 |
| NM_001772    | CD33      | 0.69 | NM_002169    | IFNA5     | 0.69 |
| NM_016326    | CKLF      | 0.69 | NM_006183    | NTS       | 0.69 |

|           |              |      |           |           |      |
|-----------|--------------|------|-----------|-----------|------|
| NM_178231 | ALS2CR14     | 0.69 | NM_021137 | TNFAIP1   | 0.69 |
| NM_005688 | ABCC5        | 0.69 | NM_024632 | SAP30L    | 0.69 |
| NM_002311 | LIG3         | 0.69 | NM_014348 | POM121L1  | 0.69 |
| NM_005001 | NDUFA7       | 0.69 | NM_006319 | CDIPT     | 0.69 |
| NM_015199 | ANKRD28      | 0.69 | NM_014901 | RNF44     | 0.69 |
| NM_015289 | VPS39        | 0.69 | NM_015565 | ZNF294    | 0.69 |
| NM_013387 | HSPC051      | 0.69 | NM_016938 | EFEMP2    | 0.69 |
| NM_018457 | DKFZP564J157 | 0.69 | NM_018484 | SLC22A11  | 0.69 |
| XM_048747 | KIAA1223     | 0.69 | NM_024709 | FLJ14146  | 0.69 |
| NM_024743 | FLJ21934     | 0.69 | NM_024757 | EHMT1     | 0.69 |
| NM_024922 | FLJ21736     | 0.69 | NM_030815 | C20ORF126 | 0.69 |
| NM_030940 | HBLD2        | 0.69 | NM_032369 | MGC15619  | 0.69 |
| NM_144581 | C14ORF149    | 0.69 | NM_153713 | MGC46719  | 0.69 |
| NM_153447 | NALP5        | 0.69 | NM_173484 | FLJ40160  | 0.69 |
| NM_144639 | FLJ31300     | 0.69 | NM_173493 | LOC139135 | 0.69 |
| NM_153360 | FLJ90166     | 0.69 | NM_181773 | ARP10     | 0.69 |
| NM_173576 | C10ORF48     | 0.69 | NM_198185 | OVTN      | 0.69 |
| NM_198511 | FLJ42925     | 0.69 | XM_294894 | LOC339281 | 0.69 |
| XM_067994 | LOC132706    | 0.69 | XM_086879 | LOC150371 | 0.69 |
| XM_373881 | LOC388727    | 0.69 | XM_377925 | LOC402244 | 0.69 |
| XM_370899 | LOC388167    | 0.69 | XM_375147 | LOC400298 | 0.69 |
| XM_379722 | LOC401616    | 0.69 | XM_374318 | LOC389834 | 0.69 |
| NM_003954 | MAP3K14      | 0.7  | NM_005296 | GPR23     | 0.7  |
| NM_030774 | OR51E2       | 0.7  | NM_001455 | FOXO3A    | 0.7  |
| NM_006004 | UQCRH        | 0.7  | NM_001661 | ARF4L     | 0.7  |
| NM_003799 | RNMT         | 0.7  | NM_015316 | PPP1R13B  | 0.7  |
| NM_016848 | SHC3         | 0.7  | NM_013278 | IL17C     | 0.7  |
| NM_001081 | CUBN         | 0.7  | NM_002313 | ABLIM1    | 0.7  |
| NM_180989 | ITR          | 0.7  | XM_374502 | MUC3A     | 0.7  |
| NM_002212 | ITGB4BP      | 0.7  | NM_002125 | HLA-DRB5  | 0.7  |
| NM_002443 | MSMB         | 0.7  | NM_003270 | TM4SF6    | 0.7  |
| NM_003517 | HIST2H2AC    | 0.7  | NM_005769 | CHST4     | 0.7  |
| NM_006553 | C18ORF43     | 0.7  | NM_007270 | FKBP9     | 0.7  |
| NM_015252 | NACSIN       | 0.7  | NM_015057 | MYCBP2    | 0.7  |
| NM_012095 | AP3M1        | 0.7  | XM_372387 | OR5L2     | 0.7  |
| NM_017831 | RNF125       | 0.7  | NM_017711 | GDPD2     | 0.7  |
| NM_017625 | ITLN1        | 0.7  | NM_020150 | SARA1     | 0.7  |
| NM_024702 | FLJ13841     | 0.7  | NM_024686 | FLJ23033  | 0.7  |
| NM_025141 | BLP2         | 0.7  | XM_374922 | KIAA1731  | 0.7  |
| NM_138349 | LOC90313     | 0.7  | NM_153336 | C10ORF89  | 0.7  |
| NM_139243 | TENR         | 0.7  | NM_152382 | FLJ37953  | 0.7  |
| XM_166532 | KIAA1950     | 0.7  | XM_375917 | LOC149692 | 0.7  |
| NM_198459 | FLJ37099     | 0.7  | NM_145314 | C10ORF49  | 0.7  |
| XM_210562 | LOC285335    | 0.7  | NM_173666 | FLJ33977  | 0.7  |
| XM_371320 | FLJ00193     | 0.7  | NM_198353 | KCTD8     | 0.7  |
| NM_206895 | UNQ830       | 0.7  | XM_061880 | LOC120126 | 0.7  |

|              |               |      |           |           |      |
|--------------|---------------|------|-----------|-----------|------|
| XM_378842    | LOC400742     | 0.7  | XM_371841 | LOC389419 | 0.7  |
| XM_372352    | LOC390054     | 0.7  | XM_377185 | LOC401679 | 0.7  |
| XM_378367    | LOC400053     | 0.7  | XM_372866 | LOC391248 | 0.7  |
| NM_018170    | P15RS         | 0.71 | NM_006457 | LIM       | 0.71 |
| NM_020778    | MIDORI        | 0.71 | NM_017572 | MKNK2     | 0.71 |
| NM_016453    | NCKIPSD       | 0.71 | NM_004833 | AIM2      | 0.71 |
| NM_012153    | EHF           | 0.71 | NM_000019 | ACAT1     | 0.71 |
| NM_145004    | ADAM32        | 0.71 | NM_001818 | AKR1C4    | 0.71 |
| NM_002340    | LSS           | 0.71 | NM_006849 | PDIP      | 0.71 |
| NM_178500    | PHOSPHO1      | 0.71 | NM_025191 | C1ORF22   | 0.71 |
| NM_021628    | ALOXE3        | 0.71 | NM_003730 | RNASSET2  | 0.71 |
| NM_001656    | TRIM23        | 0.71 | NM_007079 | PTP4A3    | 0.71 |
| NM_000888    | ITGB6         | 0.71 | NM_006889 | CD86      | 0.71 |
| NM_021833    | UCP1          | 0.71 | NM_003305 | TRPC3     | 0.71 |
| NM_006340    | BAIAP2        | 0.71 | NM_006214 | PHYH      | 0.71 |
| NM_006342    | TACC3         | 0.71 | NM_004036 | ADCY3     | 0.71 |
| NM_002483    | CEACAM6       | 0.71 | NM_006927 | SIAT4B    | 0.71 |
| NM_006471    | MRCL3         | 0.71 | NM_015198 | COBL      | 0.71 |
| NM_015015    | JMJD2B        | 0.71 | NM_015134 | M-RIP     | 0.71 |
| NM_014317    | TPRT          | 0.71 | NM_014297 | ETHE1     | 0.71 |
| NM_080671    | KCNE4         | 0.71 | NM_014487 | ZNF330    | 0.71 |
| XM_210581    | CLDN22        | 0.71 | NM_016390 | C9ORF114  | 0.71 |
| NM_020376    | TTS-2.2       | 0.71 | NM_020678 | HT017     | 0.71 |
| NM_021632    | ZNF350        | 0.71 | NM_031419 | MAIL      | 0.71 |
| NM_032130    | DKFZP434J0113 | 0.71 | NM_033549 | TRIM41    | 0.71 |
| NM_182495    | FLJ25224      | 0.71 | NM_153022 | FLJ31166  | 0.71 |
| NM_152320    | FLJ31295      | 0.71 | NM_182766 | FLJ32940  | 0.71 |
| NM_145913    | SLC5A8        | 0.71 | NM_145654 | RAD52B    | 0.71 |
| NM_175918    | FLJ34443      | 0.71 | XM_378599 | LOC283854 | 0.71 |
| NM_175066    | DDX51         | 0.71 | XM_295263 | LOC340508 | 0.71 |
| XM_212238    | LOC286235     | 0.71 | XM_292968 | LOC344191 | 0.71 |
| XM_210168    | LOC283092     | 0.71 | XM_371344 | LOC388743 | 0.71 |
| XM_379201    | LOC401079     | 0.71 | XM_372076 | LOC389705 | 0.71 |
| XM_380113    | LOC402516     | 0.71 | XM_370674 | LOC387832 | 0.71 |
| NM_001001704 | FLJ44796      | 0.71 | NM_007064 | KALRN     | 0.72 |
| NM_012193    | FZD4          | 0.72 | NM_005990 | STK10     | 0.72 |
| NM_181791    | GPR141        | 0.72 | NM_003020 | SGNE1     | 0.72 |
| NM_001453    | FOXC1         | 0.72 | NM_006166 | NFYB      | 0.72 |
| NM_002583    | PAWR          | 0.72 | NM_004462 | FDFT1     | 0.72 |
| NM_000672    | ADH6          | 0.72 | NM_004320 | ATP2A1    | 0.72 |
| XM_370662    | OR8G2         | 0.72 | NM_016382 | CD244     | 0.72 |
| NM_002300    | LDHB          | 0.72 | NM_007031 | HSF2BP    | 0.72 |
| NM_153487    | MDGA1         | 0.72 | NM_018255 | STATIP1   | 0.72 |
| NM_001127    | AP1B1         | 0.72 | NM_001217 | CA11      | 0.72 |
| NM_004377    | CPT1B         | 0.72 | NM_012207 | HNRPH3    | 0.72 |
| NM_015239    | AGTPBP1       | 0.72 | NM_006973 | ZNF32     | 0.72 |



|              |               |      |              |              |      |
|--------------|---------------|------|--------------|--------------|------|
| NM_003729    | RTCD1         | 0.72 | NM_015107    | PHF8         | 0.72 |
| NM_013267    | GLS2          | 0.72 | NM_015621    | DKFZP434C171 | 0.72 |
| NM_013450    | BAZ2B         | 0.72 | NM_017547    | H17          | 0.72 |
| NM_020190    | OLFML3        | 0.72 | NM_022134    | GAL3ST2      | 0.72 |
| NM_022341    | PDF           | 0.72 | NM_024745    | SHCBP1       | 0.72 |
| NM_024563    | FLJ14054      | 0.72 | NM_032803    | SLC7A3       | 0.72 |
| NM_031854    | KRTAP4-12     | 0.72 | NM_032901    | MGC14288     | 0.72 |
| NM_207316    | UNQ846        | 0.72 | NM_152429    | C10ORF13     | 0.72 |
| XM_086046    | ZNF599        | 0.72 | NM_139173    | LOC150159    | 0.72 |
| NM_152588    | DKFZP762A217  | 0.72 | NM_152687    | FLJ33641     | 0.72 |
| NM_181841    | TMC3          | 0.72 | NM_182619    | LOC348174    | 0.72 |
| XM_290342    | LOC339746     | 0.72 | XM_069734    | LOC136143    | 0.72 |
| XM_371207    | LOC388579     | 0.72 | XM_379494    | LOC401353    | 0.72 |
| XM_374200    | LOC389457     | 0.72 | XM_371885    | LOC389473    | 0.72 |
| XM_371731    | LOC389281     | 0.72 | XM_379452    | LOC401282    | 0.72 |
| XM_376783    | LOC401466     | 0.72 | XM_378956    | LOC400831    | 0.72 |
| NM_001004328 | FLJ16353      | 0.72 | NM_001004698 | OR2W5        | 0.72 |
| NM_004441    | EPHB1         | 0.73 | NM_014776    | GIT2         | 0.73 |
| NM_022437    | ABCG8         | 0.73 | NM_004860    | FXR2         | 0.73 |
| NM_020239    | SPEC1         | 0.73 | NM_000148    | FUT1         | 0.73 |
| NM_006033    | LIPG          | 0.73 | NM_005759    | ABI2         | 0.73 |
| NM_003064    | SLPI          | 0.73 | NM_006537    | USP3         | 0.73 |
| NM_014634    | PPM1F         | 0.73 | NM_004747    | DLG5         | 0.73 |
| NM_006783    | GJB6          | 0.73 | NM_006066    | AKR1A1       | 0.73 |
| NM_004975    | KCNB1         | 0.73 | NM_005712    | HHLA1        | 0.73 |
| NM_004473    | FOX E1        | 0.73 | NM_052902    | STK11IP      | 0.73 |
| NM_002882    | RANBP1        | 0.73 | NM_013265    | C11ORF2      | 0.73 |
| NM_001978    | EPB49         | 0.73 | NM_021134    | MRPL23       | 0.73 |
| NM_005619    | RTN2          | 0.73 | NM_001074    | UGT2B7       | 0.73 |
| NM_003245    | TGM3          | 0.73 | NM_005789    | PSME3        | 0.73 |
| NM_014773    | KIAA0141      | 0.73 | NM_006675    | NET-5        | 0.73 |
| NM_015341    | BRRN1         | 0.73 | NM_012241    | SIRT5        | 0.73 |
| NM_012154    | EIF2C2        | 0.73 | NM_152354    | ZNF285       | 0.73 |
| NM_015705    | RUTBC3        | 0.73 | NM_016069    | MAGMAS       | 0.73 |
| NM_033048    | CPXCR1        | 0.73 | NM_018043    | TMEM16A      | 0.73 |
| NM_017832    | FLJ20457      | 0.73 | NM_021226    | ARHGAP22     | 0.73 |
| XM_042661    | KIAA1530      | 0.73 | NM_024050    | PCIA1        | 0.73 |
| NM_024035    | MGC3113       | 0.73 | NM_024945    | C9ORF76      | 0.73 |
| NM_031290    | DKFZP434K1172 | 0.73 | NM_032333    | C10ORF58     | 0.73 |
| NM_032536    | NTNG2         | 0.73 | XM_379680    | LOC90120     | 0.73 |
| NM_145645    | WBSCR20B      | 0.73 | XM_050219    | SYNPO2       | 0.73 |
| NM_153241    | MGC42157      | 0.73 | NM_152743    | C7ORF27      | 0.73 |
| XM_167072    | BZRPL1        | 0.73 | NM_181723    | LOC286097    | 0.73 |
| NM_205854    | UNQ541        | 0.73 | XM_063287    | LOC122706    | 0.73 |
| XM_374055    | LOC389159     | 0.73 | XM_380114    | LOC402523    | 0.73 |
| NM_212555    | UNQ3112       | 0.73 | NM_007207    | DUSP10       | 0.74 |

|              |               |      |           |               |      |
|--------------|---------------|------|-----------|---------------|------|
| NM_005076    | CNTN2         | 0.74 | NM_005901 | SMAD2         | 0.74 |
| NM_007361    | NID2          | 0.74 | NM_003342 | UBE2G1        | 0.74 |
| NM_005077    | TLE1          | 0.74 | NM_000277 | PAH           | 0.74 |
| NM_000924    | PDE1B         | 0.74 | NM_005941 | MMP16         | 0.74 |
| NM_000096    | CP            | 0.74 | XM_165973 | USP24         | 0.74 |
| NM_006840    | LILRB5        | 0.74 | NM_002856 | PVRL2         | 0.74 |
| NM_013431    | KLRC4         | 0.74 | NM_000347 | SPTB          | 0.74 |
| NM_004866    | SCAMP1        | 0.74 | NM_000297 | PKD2          | 0.74 |
| NM_003874    | CD84          | 0.74 | NM_138578 | BCL2L1        | 0.74 |
| NM_014266    | HCST          | 0.74 | NM_015898 | ZBTB7         | 0.74 |
| NM_021954    | GJA3          | 0.74 | NM_002166 | ID2           | 0.74 |
| NM_020640    | RP42          | 0.74 | NM_033033 | KRTHB2        | 0.74 |
| NM_002635    | SLC25A3       | 0.74 | NM_014782 | ARMCX2        | 0.74 |
| NM_006661    | PDE10A        | 0.74 | NM_007196 | KLK8          | 0.74 |
| NM_007268    | Z39IG         | 0.74 | NM_015395 | DKFZP434B0335 | 0.74 |
| NM_013313    | YPEL1         | 0.74 | NM_016148 | SHANK1        | 0.74 |
| NM_016588    | NRN1          | 0.74 | NM_015622 | C7ORF28A      | 0.74 |
| NM_018474    | C20ORF19      | 0.74 | NM_020405 | PLXDC1        | 0.74 |
| XM_043653    | BEXL1         | 0.74 | XM_166707 | OR13A1        | 0.74 |
| NM_138435    | LOC113828     | 0.74 | NM_058165 | MOGAT1        | 0.74 |
| NM_152285    | ARRDC1        | 0.74 | NM_033328 | CAPZA3        | 0.74 |
| NM_152219    | GJC1          | 0.74 | NM_152607 | FLJ40201      | 0.74 |
| NM_173081    | ARMC3         | 0.74 | NM_173574 | MGC33414      | 0.74 |
| NM_199135    | FOXD4L2       | 0.74 | NM_182606 | LOC339967     | 0.74 |
| NM_207509    | FLJ46836      | 0.74 | XM_059608 | LOC132870     | 0.74 |
| XM_098980    | LOC158730     | 0.74 | XM_374022 | LOC389070     | 0.74 |
| XM_377942    | LOC402273     | 0.74 | XM_371141 | LOC388508     | 0.74 |
| NM_001005468 | OR8B2         | 0.74 | NM_002743 | PRKCSH        | 0.75 |
| NM_003265    | TLR3          | 0.75 | NM_018909 | PCDHA6        | 0.75 |
| NM_005978    | S100A2        | 0.75 | NM_020549 | CHAT          | 0.75 |
| NM_004609    | TCF15         | 0.75 | NM_003689 | AKR7A2        | 0.75 |
| NM_001334    | CTSO          | 0.75 | NM_017726 | PPP1R14D      | 0.75 |
| NM_003811    | TNFSF9        | 0.75 | NM_004428 | EFNA1         | 0.75 |
| NM_004106    | FCER1G        | 0.75 | NM_006540 | NCOA2         | 0.75 |
| NM_018234    | TSAP6         | 0.75 | NM_012120 | CD2AP         | 0.75 |
| NM_002150    | HPD           | 0.75 | NM_001689 | ATP5G3        | 0.75 |
| NM_031900    | AGXT2         | 0.75 | NM_003436 | ZNF135        | 0.75 |
| NM_003375    | VDAC2         | 0.75 | XM_496278 | ZNF516        | 0.75 |
| NM_015208    | ANKRD12       | 0.75 | NM_015908 | ARS2          | 0.75 |
| NM_016019    | LUC7L2        | 0.75 | NM_019055 | ROBO4         | 0.75 |
| XM_035953    | C9ORF11       | 0.75 | NM_018312 | C11ORF23      | 0.75 |
| NM_138704    | NDNL2         | 0.75 | XM_045271 | NGL-1         | 0.75 |
| NM_022061    | MRPL17        | 0.75 | NM_022102 | C6ORF79       | 0.75 |
| NM_030577    | MGC10993      | 0.75 | NM_024872 | FLJ22570      | 0.75 |
| NM_031297    | DKFZP761H1710 | 0.75 | NM_032243 | TXNDC2        | 0.75 |
| NM_033123    | PLCZ1         | 0.75 | NM_174890 | ANUBL1        | 0.75 |

|              |               |      |           |           |      |
|--------------|---------------|------|-----------|-----------|------|
| XM_379154    | LOC151300     | 0.75 | NM_144966 | C9ORF154  | 0.75 |
| NM_145715    | TIGD2         | 0.75 | NM_173558 | FGD2      | 0.75 |
| NM_152747    | DKFZP586I1420 | 0.75 | XM_379340 | LOC285713 | 0.75 |
| NM_181654    | CPLX4         | 0.75 | NM_182633 | FLJ39963  | 0.75 |
| XM_166160    | LOC221017     | 0.75 | XM_373868 | LOC388697 | 0.75 |
| XM_374033    | LOC389095     | 0.75 | XM_373031 | LOC391692 | 0.75 |
| XM_377974    | LOC402300     | 0.75 | XM_372123 | LOC389766 | 0.75 |
| XM_378437    | LOC400164     | 0.75 | XM_373790 | LOC388497 | 0.75 |
| NM_001005479 | OR5H6         | 0.75 | NM_002747 | MAPK4     | 0.76 |
| NM_002759    | PRKR          | 0.76 | NM_016542 | MST4      | 0.76 |
| NM_000913    | OPRL1         | 0.76 | NM_004381 | CREBL1    | 0.76 |
| NM_000027    | AGA           | 0.76 | NM_012079 | DGAT1     | 0.76 |
| NM_000791    | DHFR          | 0.76 | NM_003238 | TGFB2     | 0.76 |
| NM_001469    | G22P1         | 0.76 | XM_056455 | D2S448    | 0.76 |
| NM_138806    | CD200R        | 0.76 | NM_002193 | INHBB     | 0.76 |
| NM_000612    | IGF2          | 0.76 | NM_002374 | MAP2      | 0.76 |
| XM_046570    | KIAA1679      | 0.76 | NM_006023 | C10ORF7   | 0.76 |
| NM_018963    | C21ORF107     | 0.76 | NM_016124 | RHD       | 0.76 |
| NM_014715    | RICS          | 0.76 | NM_003184 | TAF2      | 0.76 |
| NM_005057    | RBBP5         | 0.76 | NR_001275 | CELP      | 0.76 |
| NM_005630    | SLCO2A1       | 0.76 | NM_006512 | SAA4      | 0.76 |
| NM_006470    | TRIM16        | 0.76 | NM_015125 | CIC       | 0.76 |
| NM_014935    | PEPP3         | 0.76 | NM_014351 | SULT4A1   | 0.76 |
| NM_033160    | DKFZP572C163  | 0.76 | NM_016499 | MGC:13379 | 0.76 |
| NM_015522    | D2LIC         | 0.76 | NM_018164 | FLJ10637  | 0.76 |
| NM_018349    | FLJ11175      | 0.76 | XM_048675 | KIAA1238  | 0.76 |
| NM_025202    | EFHD1         | 0.76 | NM_152302 | C20ORF158 | 0.76 |
| NM_033401    | CNTNAP4       | 0.76 | NM_138384 | SPRN      | 0.76 |
| NM_153369    | KIAA1919      | 0.76 | NM_152455 | FLJ35867  | 0.76 |
| NM_182832    | PLAC4         | 0.76 | NM_194324 | MGC39900  | 0.76 |
| NM_207437    | FLJ43486      | 0.76 | NM_203400 | LOC388394 | 0.76 |
| NM_001995    | ACSL1         | 0.76 | XM_373884 | LOC388732 | 0.76 |
| XM_376784    | LOC401467     | 0.76 | XM_377278 | LOC401725 | 0.76 |
| XM_377538    | LOC401923     | 0.76 | XM_374341 | LOC389908 | 0.76 |
| NM_001992    | F2R           | 0.77 | NM_002386 | MC1R      | 0.77 |
| NM_013388    | PREB          | 0.77 | NM_001189 | BAPX1     | 0.77 |
| NM_004865    | TBPL1         | 0.77 | NM_003437 | ZNF136    | 0.77 |
| NM_007162    | TFEB          | 0.77 | NM_004617 | TM4SF4    | 0.77 |
| NM_000785    | CYP27B1       | 0.77 | NM_014470 | RND1      | 0.77 |
| NM_012397    | SERPINB13     | 0.77 | NM_000362 | TIMP3     | 0.77 |
| NM_000551    | VHL           | 0.77 | NM_004707 | APG12L    | 0.77 |
| NM_032515    | BOK           | 0.77 | NM_014710 | GASP      | 0.77 |
| NM_002306    | LGALS3        | 0.77 | NM_005368 | MB        | 0.77 |
| NM_002394    | SLC3A2        | 0.77 | NM_002852 | PTX3      | 0.77 |
| NM_152392    | AHSA2         | 0.77 | NM_004731 | SLC16A7   | 0.77 |
| NM_014972    | KIAA1049      | 0.77 | XM_377912 | KIAA0194  | 0.77 |

|              |              |      |              |           |      |
|--------------|--------------|------|--------------|-----------|------|
| XM_371617    | TIP120B      | 0.77 | XM_037557    | KIAA0984  | 0.77 |
| NM_014375    | FETUB        | 0.77 | NM_015996    | CGI-40    | 0.77 |
| NM_024506    | GLB1L        | 0.77 | NM_025139    | FLJ12584  | 0.77 |
| NM_025147    | FLJ13448     | 0.77 | NM_133483    | GEFT      | 0.77 |
| NM_138368    | DKFZP761E198 | 0.77 | NM_152290    | MGC35194  | 0.77 |
| NM_139280    | ORMDL3       | 0.77 | NM_152356    | ZNF491    | 0.77 |
| NM_152403    | FLJ39155     | 0.77 | NM_207320    | HSBIN6    | 0.77 |
| NM_138815    | LOC151871    | 0.77 | NM_144719    | FLJ25467  | 0.77 |
| NM_152615    | FLJ40597     | 0.77 | NM_152625    | ZNF366    | 0.77 |
| XM_095965    | LOC169834    | 0.77 | NM_152679    | SLC10A4   | 0.77 |
| NM_153692    | FLJ90724     | 0.77 | NM_147198    | WFDC9     | 0.77 |
| XM_292184    | LOC341720    | 0.77 | XM_374112    | LOC389270 | 0.77 |
| XM_379264    | LOC401128    | 0.77 | XM_373631    | LOC388129 | 0.77 |
| XM_373907    | LOC388787    | 0.77 | NM_001001317 | TRY1      | 0.77 |
| NM_212554    | LOC399818    | 0.77 | NM_002093    | GSK3B     | 0.78 |
| NM_018650    | MARK1        | 0.78 | NM_032387    | PRKWINK4  | 0.78 |
| NM_012395    | PFTK1        | 0.78 | XM_291859    | OR5F1     | 0.78 |
| NM_032554    | GPR81        | 0.78 | NM_138327    | TRAR1     | 0.78 |
| NM_004932    | CDH6         | 0.78 | NM_005739    | RASGRP1   | 0.78 |
| NM_005902    | SMAD3        | 0.78 | NM_016954    | TBX22     | 0.78 |
| NM_000691    | ALDH3A1      | 0.78 | NM_017811    | UBE2R2    | 0.78 |
| NM_021147    | UNG2         | 0.78 | NM_004251    | RAB9A     | 0.78 |
| NM_000506    | F2           | 0.78 | NM_003589    | CUL4A     | 0.78 |
| NM_002827    | PTPN1        | 0.78 | NM_030764    | SPAP1     | 0.78 |
| NM_176817    | TAS2R38      | 0.78 | NM_001036    | RYR3      | 0.78 |
| NM_001980    | EPIM         | 0.78 | NM_003277    | CLDN5     | 0.78 |
| NM_030779    | KCNH6        | 0.78 | NM_004947    | DOCK3     | 0.78 |
| NM_005231    | CTTN         | 0.78 | NM_007076    | HYPE      | 0.78 |
| NM_003023    | SH3BP2       | 0.78 | NM_001288    | CLIC1     | 0.78 |
| NM_001355    | DDT          | 0.78 | NM_024758    | AGMAT     | 0.78 |
| NM_006752    | SURF5        | 0.78 | NM_006063    | KBTBD10   | 0.78 |
| NM_006864    | LILRB3       | 0.78 | XM_166571    | KIAA0363  | 0.78 |
| NM_013435    | RAX          | 0.78 | NM_015899    | LOC51054  | 0.78 |
| NM_016356    | DCDC2        | 0.78 | NM_017798    | YTHDF1    | 0.78 |
| NM_017806    | FLJ20406     | 0.78 | NM_017713    | FLJ20211  | 0.78 |
| NM_032885    | APG4D        | 0.78 | NM_152270    | FLJ34922  | 0.78 |
| NM_052958    | VEST1        | 0.78 | NM_152353    | MGC33839  | 0.78 |
| NM_153224    | MGC34034     | 0.78 | NM_153014    | FLJ30634  | 0.78 |
| XM_375563    | OR7D2        | 0.78 | NM_181714    | C6ORF152  | 0.78 |
| NM_181721    | FOXR1        | 0.78 | NM_173625    | FLJ39647  | 0.78 |
| XM_379270    | CSN1S2A      | 0.78 | XM_089307    | LOC164036 | 0.78 |
| XM_173164    | LOC256096    | 0.78 | XM_209741    | LOC285741 | 0.78 |
| XM_379078    | LOC400945    | 0.78 | XM_374248    | LOC389624 | 0.78 |
| XM_373726    | LOC388375    | 0.78 | XM_372698    | LOC390865 | 0.78 |
| NM_001005240 | OR4F17       | 0.78 | NM_004384    | CSNK1G3   | 0.79 |
| XM_291107    | NEK1         | 0.79 | NM_001275    | CHGA      | 0.79 |

|           |               |      |           |           |      |
|-----------|---------------|------|-----------|-----------|------|
| NM_022443 | MLF1          | 0.79 | NM_002913 | RFC1      | 0.79 |
| NM_002700 | POU4F3        | 0.79 | NM_001224 | CASP2     | 0.79 |
| NM_031313 | ALPPL2        | 0.79 | NM_024505 | NOX5      | 0.79 |
| NM_001728 | BSG           | 0.79 | NM_174892 | TREM5     | 0.79 |
| NM_000210 | ITGA6         | 0.79 | NM_000965 | RARB      | 0.79 |
| NM_013354 | CNOT7         | 0.79 | NM_006320 | PGRMC2    | 0.79 |
| NM_006765 | TUSC3         | 0.79 | NM_005694 | COX17     | 0.79 |
| NM_004573 | PLCB2         | 0.79 | NM_006134 | C21ORF4   | 0.79 |
| NM_005666 | HFL3          | 0.79 | NM_024015 | HOXB4     | 0.79 |
| NM_004288 | PSCDBP        | 0.79 | NM_021195 | CLDN6     | 0.79 |
| NM_006591 | POLD3         | 0.79 | NM_007365 | PADI2     | 0.79 |
| NM_014963 | KIAA0963      | 0.79 | NM_019032 | TSRC1     | 0.79 |
| NM_018944 | C21ORF45      | 0.79 | NM_016399 | HSPC132   | 0.79 |
| NM_021222 | HTCD37        | 0.79 | NM_020771 | HACE1     | 0.79 |
| NM_022479 | WBSCR17       | 0.79 | NM_024691 | FLJ23233  | 0.79 |
| NM_032822 | FLJ14668      | 0.79 | NM_176812 | C20ORF178 | 0.79 |
| NM_198077 | GM117         | 0.79 | NM_144968 | FLJ32783  | 0.79 |
| XM_375430 | LOC201229     | 0.79 | NM_152781 | FLJ32830  | 0.79 |
| NM_145658 | SPESP1        | 0.79 | NM_175893 | LOC283241 | 0.79 |
| NM_153243 | MGC26143      | 0.79 | NM_173688 | FLJ39630  | 0.79 |
| XM_374877 | DKFZP779M0652 | 0.79 | XM_380175 | MGC22265  | 0.79 |
| XM_376454 | LOC401224     | 0.79 | XM_374203 | LOC389469 | 0.79 |
| XM_374713 | LOC402455     | 0.79 | XM_373607 | LOC388014 | 0.79 |
| NM_001616 | ACVR2         | 0.8  | NM_000906 | NPR1      | 0.8  |
| NM_001118 | ADCYAP1R1     | 0.8  | NM_020993 | BCL7A     | 0.8  |
| NM_052996 | PRDM7         | 0.8  | NM_033512 | TSPYL5    | 0.8  |
| NM_001713 | BHMT          | 0.8  | NM_033068 | ACPT      | 0.8  |
| NM_007375 | TARDBP        | 0.8  | NM_001876 | CPT1A     | 0.8  |
| NM_000764 | CYP2A7        | 0.8  | NM_020230 | PPAN      | 0.8  |
| NM_002711 | PPP1R3A       | 0.8  | XM_377774 | KIF5C     | 0.8  |
| NM_000217 | KCNA1         | 0.8  | NM_006111 | ACAA2     | 0.8  |
| NM_014312 | CTXL          | 0.8  | NM_007349 | PAXIP1L   | 0.8  |
| NM_005176 | ATP5G2        | 0.8  | NM_014224 | PGA5      | 0.8  |
| NM_003053 | SLC18A1       | 0.8  | NM_182762 | 7A5       | 0.8  |
| NM_003135 | SRP19         | 0.8  | NM_003533 | HIST1H3I  | 0.8  |
| NM_014868 | RNF10         | 0.8  | XM_375485 | HELZ      | 0.8  |
| XM_036988 | KIAA1000      | 0.8  | NM_015162 | BG1       | 0.8  |
| NM_012197 | RABGAP1       | 0.8  | NM_014478 | RCP9      | 0.8  |
| NM_014179 | HSPC157       | 0.8  | NM_058184 | C21ORF42  | 0.8  |
| NM_016478 | NIPA          | 0.8  | NM_020245 | TULP4     | 0.8  |
| NM_022771 | TBC1D15       | 0.8  | NM_021819 | LMAN1L    | 0.8  |
| NM_025246 | TMEM22        | 0.8  | NM_024963 | FBXL18    | 0.8  |
| XM_370653 | KIAA1826      | 0.8  | NM_032838 | ZNF566    | 0.8  |
| XM_291077 | LOC90113      | 0.8  | NM_153704 | MGC26979  | 0.8  |
| XM_056282 | KIAA1904      | 0.8  | NM_198844 | ZBPB2     | 0.8  |
| NM_033209 | LOC94105      | 0.8  | NM_152503 | C20ORF132 | 0.8  |

|           |              |      |              |           |      |
|-----------|--------------|------|--------------|-----------|------|
| NM_181535 | KRT25D       | 0.8  | NM_145024    | FLJ31547  | 0.8  |
| XM_373580 | LOC254028    | 0.8  | NM_178434    | LCE3C     | 0.8  |
| NM_178571 | MGC51025     | 0.8  | NM_021066    | HIST1H2AJ | 0.8  |
| NM_003524 | HIST1H2BH    | 0.8  | XM_291099    | LOC339977 | 0.8  |
| XM_209180 | LOC284397    | 0.8  | XM_208361    | LOC285900 | 0.8  |
| XM_372966 | LOC391462    | 0.8  | XM_375738    | LOC400757 | 0.8  |
| XM_374113 | LOC389271    | 0.8  | NM_001005513 | OR4C45    | 0.8  |
| NM_007023 | RAPGEF4      | 0.81 | NM_002436    | MPP1      | 0.81 |
| NM_012073 | CCT5         | 0.81 | NM_014079    | KLF15     | 0.81 |
| NM_006434 | SORBS1       | 0.81 | NM_022114    | PRDM16    | 0.81 |
| NM_014587 | SOX8         | 0.81 | NM_018310    | BRF2      | 0.81 |
| NM_018324 | THEDC1       | 0.81 | NM_003362    | UNG       | 0.81 |
| NM_016109 | ANGPTL4      | 0.81 | NM_176875    | CCKBR     | 0.81 |
| NM_005514 | HLA-B        | 0.81 | NM_017761    | PNRC2     | 0.81 |
| NM_012201 | GLG1         | 0.81 | NM_016179    | TRPC4     | 0.81 |
| NM_000619 | IFNG         | 0.81 | NM_005567    | LGALS3BP  | 0.81 |
| NM_004774 | PPARBP       | 0.81 | NM_005909    | MAP1B     | 0.81 |
| NM_001670 | ARVCF        | 0.81 | NM_031436    | AKR1CL2   | 0.81 |
| NM_006391 | IPO7         | 0.81 | NM_006071    | PKDREJ    | 0.81 |
| NM_004065 | CDR1         | 0.81 | NM_001725    | BPI       | 0.81 |
| NM_000085 | CLCNKB       | 0.81 | NM_004628    | XPC       | 0.81 |
| NM_004388 | CTBS         | 0.81 | NM_001460    | FMO2      | 0.81 |
| NM_002407 | SCGB2A1      | 0.81 | NM_020133    | AGPAT4    | 0.81 |
| NM_020745 | AARSL        | 0.81 | NM_003047    | SLC9A1    | 0.81 |
| NM_004627 | WRB          | 0.81 | NM_005782    | THOC4     | 0.81 |
| NM_014888 | FAM3C        | 0.81 | NM_006581    | FUT9      | 0.81 |
| NM_006809 | TOMM34       | 0.81 | NM_006657    | FTCD      | 0.81 |
| NM_015558 | SS18L1       | 0.81 | NM_015596    | KLK13     | 0.81 |
| NM_014455 | ZNF364       | 0.81 | NM_022034    | CUZD1     | 0.81 |
| NM_020208 | SLC6A20      | 0.81 | NM_018064    | C6ORF166  | 0.81 |
| NM_018388 | MBNL3        | 0.81 | NM_020062    | SLC2A4RG  | 0.81 |
| NM_020859 | SHRML        | 0.81 | NM_031921    | ATAD3B    | 0.81 |
| NM_032731 | TXNL5        | 0.81 | NM_032888    | COL27A1   | 0.81 |
| XM_036936 | KIAA1666     | 0.81 | NM_052858    | MRVLDC3   | 0.81 |
| XM_057040 | KIAA1922     | 0.81 | NM_138333    | C9ORF42   | 0.81 |
| XM_372578 | LOC123346    | 0.81 | XM_085261    | MESP2     | 0.81 |
| NM_152539 | FLJ32859     | 0.81 | NM_170725    | PGBD2     | 0.81 |
| XM_211805 | LOC285205    | 0.81 | NM_175907    | ZADH2     | 0.81 |
| NM_178148 | SLC35B2      | 0.81 | XM_208403    | LOC286310 | 0.81 |
| XM_379935 | LOC402601    | 0.81 | XM_380044    | LOC402695 | 0.81 |
| NM_001258 | CDK3         | 0.82 | NM_004670    | PAPSS2    | 0.82 |
| NM_003691 | STK16        | 0.82 | NM_014246    | CELSR1    | 0.82 |
| NM_002564 | P2RY2        | 0.82 | NM_173077    | CPO       | 0.82 |
| NM_001910 | CTSE         | 0.82 | NM_018449    | UBAP2     | 0.82 |
| XM_291241 | IPLA2(GAMMA) | 0.82 | NM_014248    | RBX1      | 0.82 |
| NM_021003 | PPM1A        | 0.82 | NM_004257    | TGFBRAP1  | 0.82 |

|              |           |      |           |           |      |
|--------------|-----------|------|-----------|-----------|------|
| NM_001496    | GFRA3     | 0.82 | NM_001124 | ADM       | 0.82 |
| NM_007045    | FGFR1OP   | 0.82 | NM_006495 | EVI2B     | 0.82 |
| NM_017675    | PC-LKC    | 0.82 | NM_014059 | RGC32     | 0.82 |
| NM_006717    | SPIN      | 0.82 | NM_001281 | CKAP1     | 0.82 |
| NM_003048    | SLC9A2    | 0.82 | NM_003054 | SLC18A2   | 0.82 |
| NM_005868    | BET1      | 0.82 | NM_014765 | TOMM20    | 0.82 |
| NM_007215    | POLG2     | 0.82 | NM_014929 | KIAA0971  | 0.82 |
| NM_001001560 | GGA1      | 0.82 | NM_014037 | SLC6A16   | 0.82 |
| NM_014039    | PTD012    | 0.82 | NM_016563 | RASL12    | 0.82 |
| NM_173160    | FXYD4     | 0.82 | NM_019038 | TDRD4     | 0.82 |
| XM_373170    | LOC54103  | 0.82 | NM_020212 | LOC56964  | 0.82 |
| NM_022094    | CIDE-3    | 0.82 | NM_024313 | MGC3731   | 0.82 |
| NM_053285    | TEKT1     | 0.82 | NM_032258 | TBC1D3    | 0.82 |
| NM_032539    | SLITRK2   | 0.82 | NM_052844 | WDR34     | 0.82 |
| NM_033261    | IDI2      | 0.82 | NM_138817 | SLC7A13   | 0.82 |
| NM_152592    | C14ORF49  | 0.82 | XM_378628 | MGC23284  | 0.82 |
| NM_152662    | FLJ23867  | 0.82 | NM_153020 | RBM24     | 0.82 |
| XM_292093    | LST-3     | 0.82 | XM_208312 | LOC285296 | 0.82 |
| XM_173160    | LOC255187 | 0.82 | XM_371825 | LOC389396 | 0.82 |
| NM_020397    | CAMK1D    | 0.83 | NM_003816 | ADAM9     | 0.83 |
| NM_030883    | OR2H1     | 0.83 | NM_145805 | ISL2      | 0.83 |
| NM_016932    | SIX2      | 0.83 | NM_005670 | EPM2A     | 0.83 |
| NM_003713    | PPAP2B    | 0.83 | NM_018402 | IL26      | 0.83 |
| NM_002086    | GRB2      | 0.83 | NM_003373 | VCL       | 0.83 |
| NM_000393    | COL5A2    | 0.83 | NM_004050 | BCL2L2    | 0.83 |
| NM_000655    | SELL      | 0.83 | NM_001311 | CRIP1     | 0.83 |
| NM_001915    | CYB561    | 0.83 | NM_004468 | FHL3      | 0.83 |
| XM_371116    | MYO5B     | 0.83 | NM_004710 | SYNGR2    | 0.83 |
| XM_376519    | ANKRD6    | 0.83 | NM_014573 | MAC30     | 0.83 |
| NM_015973    | GAL       | 0.83 | NM_017877 | C2ORF18   | 0.83 |
| NM_018661    | DEFB103A  | 0.83 | NM_020456 | C13ORF1   | 0.83 |
| NM_020662    | MRS2L     | 0.83 | XM_098368 | KCTD16    | 0.83 |
| NM_080670    | SLC35A4   | 0.83 | NM_080661 | MGC15937  | 0.83 |
| NM_054110    | GALNTL2   | 0.83 | NM_080747 | K6IRS2    | 0.83 |
| XM_091331    | LOC162073 | 0.83 | XM_373810 | LOC199800 | 0.83 |
| NM_207385    | FLJ26184  | 0.83 | NM_206838 | LOC390511 | 0.83 |
| NM_173793    | LOC128977 | 0.83 | XM_373855 | LOC388655 | 0.83 |
| XM_373846    | LOC388639 | 0.83 | XM_378203 | LOC399708 | 0.83 |
| XM_375424    | LOC400586 | 0.83 | NM_004051 | BDH       | 0.84 |
| NM_017607    | PPP1R12C  | 0.84 | NM_000553 | WRN       | 0.84 |
| NM_003682    | MADD      | 0.84 | XM_371358 | OR2M4     | 0.84 |
| NM_052931    | SLAMF6    | 0.84 | NM_002493 | NDUFB6    | 0.84 |
| NM_005628    | SLC1A5    | 0.84 | NM_003917 | AP1G2     | 0.84 |
| XM_375593    | ZNF536    | 0.84 | NM_006838 | METAP2    | 0.84 |
| NM_012208    | HARSL     | 0.84 | NM_134264 | WSB1      | 0.84 |
| NM_013352    | SART2     | 0.84 | XM_041116 | C14ORF171 | 0.84 |

|           |           |      |           |               |      |
|-----------|-----------|------|-----------|---------------|------|
| NM_020689 | SLC24A3   | 0.84 | NM_020936 | DDX55         | 0.84 |
| NM_052840 | BRUNOL6   | 0.84 | NM_024536 | CHPF          | 0.84 |
| NM_022818 | MAP1LC3B  | 0.84 | NM_032246 | RKHD3         | 0.84 |
| NM_032814 | FLJ14627  | 0.84 | NM_138348 | LOC90268      | 0.84 |
| NM_033445 | HIST3H2A  | 0.84 | NM_016311 | ATPIF1        | 0.84 |
| NM_152330 | C14ORF31  | 0.84 | NM_145176 | SLC2A12       | 0.84 |
| XM_117174 | SLC5A9    | 0.84 | NM_198991 | KCTD1         | 0.84 |
| XM_209111 | LOC284307 | 0.84 | NM_174952 | MGC46496      | 0.84 |
| NM_012315 | KLK9      | 0.84 | NM_182586 | FLJ33534      | 0.84 |
| NM_173653 | SLC9A9    | 0.84 | XM_294993 | LOC339529     | 0.84 |
| NM_201548 | RP26      | 0.84 | NM_203451 | LOC400120     | 0.84 |
| XM_379298 | LOC401164 | 0.84 | XM_378054 | LOC402360     | 0.84 |
| XM_373498 | LOC387764 | 0.84 | NM_005476 | GNE           | 0.85 |
| NM_006251 | PRKAA1    | 0.85 | NM_002227 | JAK1          | 0.85 |
| NM_012424 | RPS6KC1   | 0.85 | NM_000647 | CCR2          | 0.85 |
| NM_000842 | GRM5      | 0.85 | NM_005314 | GRPR          | 0.85 |
| NM_017884 | PINX1     | 0.85 | NM_002735 | PRKAR1B       | 0.85 |
| NM_016361 | ACP6      | 0.85 | NM_003194 | TBP           | 0.85 |
| NM_001510 | GRID2     | 0.85 | NM_002118 | HLA-DMB       | 0.85 |
| NM_017823 | DUSP23    | 0.85 | NM_000077 | CDKN2A        | 0.85 |
| NM_024317 | ILT10     | 0.85 | NM_053276 | VIT           | 0.85 |
| NM_003055 | SLC18A3   | 0.85 | NM_003619 | PRSS12        | 0.85 |
| NM_003458 | BSN       | 0.85 | NM_014711 | CP110         | 0.85 |
| NM_006812 | OS-9      | 0.85 | NM_015091 | KIAA0423      | 0.85 |
| NM_013275 | ANKRD11   | 0.85 | NM_013357 | PURG          | 0.85 |
| NM_016401 | HSPC138   | 0.85 | NM_017781 | FLJ20359      | 0.85 |
| NM_020375 | C12ORF5   | 0.85 | NM_032512 | PDZK4         | 0.85 |
| NM_024613 | PLEKHF2   | 0.85 | NM_024528 | NKAP          | 0.85 |
| NM_033035 | TSLP      | 0.85 | XM_098238 | DKFZP434D0215 | 0.85 |
| XM_290865 | LOC163233 | 0.85 | NM_144988 | MGC19780      | 0.85 |
| NM_152682 | MGC10198  | 0.85 | NM_139319 | SLC17A8       | 0.85 |
| XM_373603 | C14ORF86  | 0.85 | NM_181786 | HKR1          | 0.85 |
| NM_198496 | AMACO     | 0.85 | XM_498131 | LOC442247     | 0.85 |
| XM_210334 | LOC284064 | 0.85 | XM_378564 | LOC400500     | 0.85 |
| NM_005975 | PTK6      | 0.86 | NM_000621 | HTR2A         | 0.86 |
| NM_003554 | OR1E2     | 0.86 | NM_014522 | PCDH11X       | 0.86 |
| NM_021951 | DMRT1     | 0.86 | NM_006236 | POU3F3        | 0.86 |
| NM_001068 | TOP2B     | 0.86 | NM_013315 | TPTE          | 0.86 |
| NM_021096 | CACNA11   | 0.86 | NM_001630 | ANXA8         | 0.86 |
| NM_001197 | BIK       | 0.86 | NM_002294 | LAMP2         | 0.86 |
| NM_006432 | NPC2      | 0.86 | NM_021019 | MYL6          | 0.86 |
| NM_002217 | ITIH3     | 0.86 | NM_006151 | LPO           | 0.86 |
| NM_079420 | MYL1      | 0.86 | NM_145804 | ABTB2         | 0.86 |
| NM_002670 | PLS1      | 0.86 | NM_006978 | ZNF183        | 0.86 |
| NM_001054 | SULT1A2   | 0.86 | NM_014745 | FAM38A        | 0.86 |
| NM_012240 | SIRT4     | 0.86 | NM_015444 | RIS1          | 0.86 |



|              |           |      |           |           |      |
|--------------|-----------|------|-----------|-----------|------|
| NM_015698    | GPKOW     | 0.86 | NM_015720 | PODLX2    | 0.86 |
| NM_016379    | VCX3      | 0.86 | NM_017515 | SLC35F2   | 0.86 |
| NM_017845    | COMMD8    | 0.86 | NM_018183 | SBNO1     | 0.86 |
| NM_020412    | CHMP1.5   | 0.86 | NM_022757 | FLJ12892  | 0.86 |
| NM_032221    | CHD6      | 0.86 | NM_033548 | MGC12518  | 0.86 |
| NM_032857    | LACTB     | 0.86 | NM_015230 | CENTD1    | 0.86 |
| NM_178834    | LOC143903 | 0.86 | XM_114000 | ANKRD24   | 0.86 |
| NM_152620    | TRIM60    | 0.86 | NM_173544 | BCNP1     | 0.86 |
| NM_201546    | LOC200008 | 0.86 | NM_153610 | CMYA5     | 0.86 |
| NM_172138    | IL28A     | 0.86 | NM_175898 | LOC283687 | 0.86 |
| NM_006382    | CDRT1     | 0.86 | XM_066534 | LOC139189 | 0.86 |
| XM_373839    | LOC388622 | 0.86 | XM_373027 | LOC391656 | 0.86 |
| XM_373303    | LOC392360 | 0.86 | XM_378421 | LOC400144 | 0.86 |
| XM_373904    | LOC388780 | 0.86 | NM_002750 | MAPK8     | 0.87 |
| NM_022726    | ELOVL4    | 0.87 | NM_006018 | GPR109B   | 0.87 |
| NM_004296    | RGS6      | 0.87 | NM_001419 | ELAVL1    | 0.87 |
| NM_005611    | RBL2      | 0.87 | NM_000330 | RS1       | 0.87 |
| NM_014620    | HOXC4     | 0.87 | NM_004506 | HSF2      | 0.87 |
| NM_001546    | ID4       | 0.87 | NM_003140 | SRY       | 0.87 |
| NM_006022    | TGFB114   | 0.87 | NM_003244 | TGIF      | 0.87 |
| NM_005763    | AASS      | 0.87 | NM_006810 | PDIR      | 0.87 |
| NM_015052    | NEDL1     | 0.87 | NM_005167 | PPP2CZ    | 0.87 |
| NM_021258    | IL22RA1   | 0.87 | NM_020530 | OSM       | 0.87 |
| NM_000358    | TGFB1     | 0.87 | NM_020897 | HCN3      | 0.87 |
| NM_001886    | CRYBA4    | 0.87 | NM_000143 | FH        | 0.87 |
| NM_020366    | RPGRIP1   | 0.87 | NM_005956 | MTHFD1    | 0.87 |
| NM_004587    | RRBP1     | 0.87 | NM_003976 | ARTN      | 0.87 |
| NM_005752    | CLECSF1   | 0.87 | NM_033178 | DUX4      | 0.87 |
| NM_015358    | ZCWCC3    | 0.87 | NM_013451 | FER1L3    | 0.87 |
| NM_014442    | SIGLEC8   | 0.87 | NM_019092 | KIAA1164  | 0.87 |
| NM_017743    | DPP8      | 0.87 | NM_018122 | FLJ10514  | 0.87 |
| NM_018263    | ASXL2     | 0.87 | XM_374080 | KIAA0114  | 0.87 |
| NM_020944    | GBA2      | 0.87 | NM_021257 | NGB       | 0.87 |
| NM_024861    | FLJ22671  | 0.87 | NM_030787 | FHR5      | 0.87 |
| NM_080651    | THRAP6    | 0.87 | NM_170710 | WDR17     | 0.87 |
| NM_152905    | NEDD1     | 0.87 | NM_145261 | TIM14     | 0.87 |
| XM_375353    | LOC146481 | 0.87 | NM_144697 | LOC148523 | 0.87 |
| NM_138499    | PWWP2     | 0.87 | NM_152718 | FLJ32009  | 0.87 |
| NM_032895    | MGC14376  | 0.87 | XM_208990 | LOC284067 | 0.87 |
| XM_293924    | LOC345651 | 0.87 | XM_377820 | LOC402152 | 0.87 |
| XM_374300    | LOC389777 | 0.87 | XM_374842 | FLJ37035  | 0.87 |
| XM_373914    | LOC388796 | 0.87 | XM_375963 | LOC400891 | 0.87 |
| XM_373953    | LOC388890 | 0.87 | XM_373347 | LOC392465 | 0.87 |
| NM_001005465 | OR10G3    | 0.87 | NM_024838 | THNSL1    | 0.88 |
| NM_004439    | EPHA5     | 0.88 | NM_002958 | RYK       | 0.88 |
| NM_003453    | ZNF198    | 0.88 | NM_030791 | SGPP1     | 0.88 |

|           |           |      |              |           |      |
|-----------|-----------|------|--------------|-----------|------|
| NM_006003 | UQCRFS1   | 0.88 | NM_006270    | RRAS      | 0.88 |
| NM_004162 | RAB5A     | 0.88 | NM_014606    | HERC3     | 0.88 |
| NM_014271 | IL1RAPL1  | 0.88 | NM_014339    | IL17R     | 0.88 |
| NM_001621 | AHR       | 0.88 | NM_002280    | KRTHA5    | 0.88 |
| NM_004787 | SLIT2     | 0.88 | NM_004572    | PKP2      | 0.88 |
| NM_000219 | KCNE1     | 0.88 | NM_181334    | ARHGAP8   | 0.88 |
| NM_000852 | GSTP1     | 0.88 | NM_003550    | MAD1L1    | 0.88 |
| NM_001815 | CEACAM3   | 0.88 | NM_001109    | ADAM8     | 0.88 |
| NM_004769 | ACCN3     | 0.88 | NM_006796    | AFG3L2    | 0.88 |
| NM_004172 | SLC1A3    | 0.88 | NM_152328    | ADSSL1    | 0.88 |
| NM_002776 | KLK10     | 0.88 | NM_014646    | LPIN2     | 0.88 |
| NM_014679 | KIAA0092  | 0.88 | NM_014724    | ZNF305    | 0.88 |
| NM_007195 | POLI      | 0.88 | NM_006684    | FHR-4     | 0.88 |
| NM_012081 | ELL2      | 0.88 | NM_015942    | CGI-12    | 0.88 |
| NM_022003 | FXYD6     | 0.88 | XM_085929    | MEIS3     | 0.88 |
| NM_018687 | LOC55908  | 0.88 | NM_007008    | RTN4      | 0.88 |
| NM_024341 | ZNF557    | 0.88 | NM_024828    | C9ORF82   | 0.88 |
| XM_291315 | KIAA1815  | 0.88 | NM_032872    | SYTL1     | 0.88 |
| NM_032376 | MGC4251   | 0.88 | NM_138700    | TRIM40    | 0.88 |
| NM_138476 | MGC5987   | 0.88 | NM_138492    | MGC21644  | 0.88 |
| NM_152666 | FLJ40773  | 0.88 | NM_152766    | MGC40107  | 0.88 |
| NM_198508 | FLJ44186  | 0.88 | XM_060104    | LOC126637 | 0.88 |
| XM_114166 | LOC200230 | 0.88 | XM_117514    | LOC203235 | 0.88 |
| XM_379102 | LOC400960 | 0.88 | XM_372941    | LOC391405 | 0.88 |
| XM_374111 | LOC389269 | 0.88 | XM_377230    | LOC401703 | 0.88 |
| XM_378631 | LOC400558 | 0.88 | NM_001005238 | OR51G2    | 0.88 |
| NM_006206 | PDGFRA    | 0.89 | NM_004690    | LATS1     | 0.89 |
| NM_002648 | PIM1      | 0.89 | NM_152430    | MGC24137  | 0.89 |
| NM_000329 | RPE65     | 0.89 | NM_013266    | CTNNA3    | 0.89 |
| NM_000308 | PPGB      | 0.89 | NM_016188    | ACTL6     | 0.89 |
| NM_022336 | EDAR      | 0.89 | NM_006249    | PRB3      | 0.89 |
| NM_003810 | TNFSF10   | 0.89 | NM_016929    | CLIC5     | 0.89 |
| NM_001765 | CD1C      | 0.89 | NM_032839    | DIRC2     | 0.89 |
| NM_004221 | NK4       | 0.89 | NM_003150    | STAT3     | 0.89 |
| NM_198270 | NHS       | 0.89 | NM_004593    | SFRS10    | 0.89 |
| NM_003108 | SOX11     | 0.89 | NM_004875    | POLR1C    | 0.89 |
| NM_004801 | NRXN1     | 0.89 | NM_014649    | SAFB2     | 0.89 |
| NM_014705 | DOCK4     | 0.89 | XM_049380    | KIAA0339  | 0.89 |
| NM_014714 | KIAA0590  | 0.89 | NM_014610    | GANAB     | 0.89 |
| NM_013244 | HGNT-IV-H | 0.89 | NM_014180    | MRPL22    | 0.89 |
| XM_039495 | D15WSU75E | 0.89 | NM_016404    | HSPC152   | 0.89 |
| NM_017735 | FLJ20272  | 0.89 | NM_021942    | FLJ12716  | 0.89 |
| NM_031309 | SCRT1     | 0.89 | NM_152903    | KBTBD6    | 0.89 |
| NM_182491 | LOC90637  | 0.89 | XM_056680    | LOC115749 | 0.89 |
| NM_080821 | C20ORF108 | 0.89 | NM_138792    | LOC123169 | 0.89 |
| XM_096688 | LOC144920 | 0.89 | NM_080749    | NEURL2    | 0.89 |

|           |           |      |           |           |      |
|-----------|-----------|------|-----------|-----------|------|
| NM_138573 | LOC145957 | 0.89 | NM_152491 | FLJ32569  | 0.89 |
| XM_371267 | LOC164045 | 0.89 | NM_173528 | FLJ38615  | 0.89 |
| NM_152695 | FLJ23614  | 0.89 | NM_173677 | FLJ40852  | 0.89 |
| XM_047554 | LOC148198 | 0.89 | XM_166820 | LOC219464 | 0.89 |
| XM_376257 | LOC401082 | 0.89 | XM_375746 | LOC400759 | 0.89 |
| XM_374161 | LOC389369 | 0.89 | XM_372466 | LOC390335 | 0.89 |
| XM_377475 | LOC401883 | 0.89 | NM_004438 | EPHA4     | 0.9  |
| NM_032422 | GPR123    | 0.9  | NM_002032 | FTH1      | 0.9  |
| NM_012225 | NUBP2     | 0.9  | NM_004992 | MECP2     | 0.9  |
| NM_000303 | PMM2      | 0.9  | NM_018677 | ACAS2     | 0.9  |
| NM_005264 | GFRA1     | 0.9  | NM_005856 | RAMP3     | 0.9  |
| NM_130785 | TPTE2     | 0.9  | NM_014440 | IL1F6     | 0.9  |
| NM_001252 | TNFSF7    | 0.9  | NM_000350 | ABCA4     | 0.9  |
| NM_012142 | CCNDBP1   | 0.9  | NM_004791 | ITGBL1    | 0.9  |
| NM_014845 | KIAA0274  | 0.9  | NM_005257 | GATA6     | 0.9  |
| NM_012083 | FRAT2     | 0.9  | NM_000715 | C4BPA     | 0.9  |
| NM_005181 | CA3       | 0.9  | NM_005599 | NHLH2     | 0.9  |
| NM_006933 | SLC5A3    | 0.9  | NM_006532 | ELL       | 0.9  |
| NM_005667 | RNF103    | 0.9  | NM_014260 | HKE2      | 0.9  |
| NM_015959 | TMX2      | 0.9  | NM_016033 | CGI-90    | 0.9  |
| NM_017545 | HAO1      | 0.9  | NM_018375 | SLC39A9   | 0.9  |
| NM_207306 | KIAA0495  | 0.9  | NM_020415 | RETN      | 0.9  |
| XM_378197 | FLJ14464  | 0.9  | NM_080672 | PHACTR3   | 0.9  |
| NM_152352 | C18ORF19  | 0.9  | NM_181522 | WFDC3     | 0.9  |
| NM_138818 | C9ORF65   | 0.9  | NM_198464 | UNQ9391   | 0.9  |
| XM_294751 | LOC338949 | 0.9  | XM_291346 | LOC340591 | 0.9  |
| XM_379200 | LOC401078 | 0.9  | XM_371714 | LOC389239 | 0.9  |
| XM_379858 | LOC402539 | 0.9  | XM_373671 | LOC388231 | 0.9  |
| NM_001052 | SSTR4     | 0.91 | NM_023921 | TAS2R10   | 0.91 |
| NM_021979 | HSPA2     | 0.91 | NM_000328 | RPGR      | 0.91 |
| NM_003655 | CBX4      | 0.91 | NM_005606 | LG MN     | 0.91 |
| NM_058176 | HDAC9     | 0.91 | NM_004290 | RNF14     | 0.91 |
| NM_006378 | SEMA4D    | 0.91 | NM_003307 | TRPM2     | 0.91 |
| NM_000033 | ABCD1     | 0.91 | NM_014350 | TNFAIP8   | 0.91 |
| NM_153257 | GIOT-1    | 0.91 | NM_000897 | LTC4S     | 0.91 |
| NM_001293 | CLNS1A    | 0.91 | NM_174930 | PMS2L5    | 0.91 |
| XM_290670 | LOC23117  | 0.91 | XM_371761 | KIAA0825  | 0.91 |
| NM_015180 | SYNE2     | 0.91 | NM_018149 | FLJ10587  | 0.91 |
| NM_017664 | ANKRD10   | 0.91 | NM_032146 | ARL6      | 0.91 |
| NM_032211 | LOXL4     | 0.91 | NM_032874 | KIAA1984  | 0.91 |
| NM_138773 | LOC91137  | 0.91 | NM_153013 | FLJ30596  | 0.91 |
| NM_173167 | CMYA4     | 0.91 | XM_212581 | ZNF311    | 0.91 |
| XM_379288 | LOC340017 | 0.91 | NM_207399 | FLJ36116  | 0.91 |
| XM_291017 | LOC339793 | 0.91 | XM_291716 | LOC340784 | 0.91 |
| XM_296117 | LOC341333 | 0.91 | XM_374058 | LOC389162 | 0.91 |
| XM_372002 | LOC389599 | 0.91 | XM_373573 | LOC387942 | 0.91 |

|           |           |      |           |           |      |
|-----------|-----------|------|-----------|-----------|------|
| XM_372576 | LOC390598 | 0.91 | XM_377445 | LOC401860 | 0.91 |
| XM_372689 | LOC390828 | 0.91 | NM_005109 | OSR1      | 0.92 |
| NM_006785 | MALT1     | 0.92 | NM_003468 | FZD5      | 0.92 |
| NM_005683 | GPR55     | 0.92 | NM_015355 | JJAZ1     | 0.92 |
| NM_003371 | VAV2      | 0.92 | NM_003078 | SMARCD3   | 0.92 |
| NM_002027 | FNTA      | 0.92 | NM_003873 | NRP1      | 0.92 |
| NM_002910 | RENBP     | 0.92 | NM_006092 | CARD4     | 0.92 |
| NM_002120 | HLA-DOB   | 0.92 | NM_002851 | PTPRZ1    | 0.92 |
| NM_002192 | INHBA     | 0.92 | NM_001855 | COL15A1   | 0.92 |
| NM_020939 | CPNE5     | 0.92 | NM_052845 | MMAB      | 0.92 |
| NM_000432 | MYL2      | 0.92 | NM_003324 | TULP3     | 0.92 |
| NM_004889 | ATP5J2    | 0.92 | NM_007185 | TNRC4     | 0.92 |
| NM_152280 | SYT11     | 0.92 | NM_017741 | FLJ20280  | 0.92 |
| NM_018651 | ZNF167    | 0.92 | NM_022911 | SLC26A6   | 0.92 |
| NM_032496 | ARHGAP9   | 0.92 | NM_024656 | FLJ22329  | 0.92 |
| NM_024661 | FLJ12436  | 0.92 | NM_025026 | FLJ14107  | 0.92 |
| NM_032434 | ZNF512    | 0.92 | NM_052905 | FMNL2     | 0.92 |
| NM_152390 | MGC33926  | 0.92 | NM_153347 | FLJ90119  | 0.92 |
| NM_153027 | FLJ31659  | 0.92 | NM_153607 | LOC153222 | 0.92 |
| NM_138575 | MGC5352   | 0.92 | NM_178276 | C5ORF12   | 0.92 |
| NM_174943 | FLJ25976  | 0.92 | XM_212170 | LOC286094 | 0.92 |
| NM_198722 | AMIGO3    | 0.92 | XM_166971 | LOC220416 | 0.92 |
| XM_017374 | LOC150580 | 0.92 | XM_293354 | LOC347442 | 0.92 |
| XM_377630 | LOC401983 | 0.92 | XM_372161 | LOC389816 | 0.92 |
| XM_378511 | LOC400368 | 0.92 | XM_379041 | LOC400920 | 0.92 |
| XM_496820 | LOC441165 | 0.92 | NM_002612 | PDK4      | 0.93 |
| NM_000823 | GHRHR     | 0.93 | NM_022124 | CDH23     | 0.93 |
| NM_052949 | RASGRP4   | 0.93 | NM_030751 | TCF8      | 0.93 |
| NM_003343 | UBE2G2    | 0.93 | NM_021197 | WFDC1     | 0.93 |
| NM_004308 | ARHGAP1   | 0.93 | NM_006611 | KLRA1     | 0.93 |
| NM_014812 | KAB       | 0.93 | NM_015322 | FEM1B     | 0.93 |
| NM_002026 | FN1       | 0.93 | NM_001845 | COL4A1    | 0.93 |
| NM_000698 | ALOX5     | 0.93 | NM_014386 | PKD2L2    | 0.93 |
| NM_018173 | FLJ10665  | 0.93 | NM_001540 | HSPB1     | 0.93 |
| NM_004174 | SLC9A3    | 0.93 | NM_153332 | 3'HEXO    | 0.93 |
| XM_091895 | ZNF17     | 0.93 | NM_003943 | GENX-3414 | 0.93 |
| NM_014280 | DNAJC8    | 0.93 | NM_012123 | MTO1      | 0.93 |
| XM_166479 | KIAA0240  | 0.93 | NM_014955 | CGI-01    | 0.93 |
| NM_020162 | DHX33     | 0.93 | NM_020198 | GK001     | 0.93 |
| NM_020123 | SMBP      | 0.93 | NM_021190 | PTBP2     | 0.93 |
| NM_024023 | UNKL      | 0.93 | NM_024902 | FLJ13236  | 0.93 |
| NM_031209 | QTRT1     | 0.93 | NM_032047 | B3GNT5    | 0.93 |
| NM_032565 | EBPL      | 0.93 | NM_033105 | DNAJC5B   | 0.93 |
| XM_030958 | LOC90333  | 0.93 | NM_080429 | AQP10     | 0.93 |
| NM_052904 | KIAA1900  | 0.93 | NM_052953 | LRP15     | 0.93 |
| NM_178826 | TMEM16D   | 0.93 | NM_175575 | WFIKKNRP  | 0.93 |

|              |           |      |           |           |      |
|--------------|-----------|------|-----------|-----------|------|
| NM_133265    | AMOT      | 0.93 | NM_173560 | RFXDC1    | 0.93 |
| NM_178815    | ARL8      | 0.93 | NM_153261 | FLJ38101  | 0.93 |
| NM_173644    | FLJ33860  | 0.93 | NM_175619 | ZAR1      | 0.93 |
| NM_203494    | USP50     | 0.93 | NM_199349 | LOC375616 | 0.93 |
| XM_376068    | LOC400962 | 0.93 | XM_379173 | LOC401050 | 0.93 |
| XM_371486    | LOC388937 | 0.93 | XM_377933 | LOC402251 | 0.93 |
| XM_380077    | LOC402720 | 0.93 | XM_372122 | LOC389765 | 0.93 |
| XM_379539    | LOC401440 | 0.93 | NM_181657 | LTB4R     | 0.94 |
| NM_000906    | NPR1      | 0.94 | NM_000872 | HTR7      | 0.94 |
| NM_001882    | CRHBP     | 0.94 | NM_002920 | RFX4      | 0.94 |
| NM_020974    | SCUBE2    | 0.94 | NM_013320 | HCFC2     | 0.94 |
| NM_014500    | HTATSF1   | 0.94 | NM_000771 | CYP2C9    | 0.94 |
| NM_019093    | UGT1A3    | 0.94 | NM_005802 | TOPORS    | 0.94 |
| NM_003644    | GAS7      | 0.94 | NM_033553 | GUCA2A    | 0.94 |
| NM_022169    | ABCG4     | 0.94 | NM_013380 | ZNF228    | 0.94 |
| NM_003784    | SERPINB7  | 0.94 | XM_375074 | KIAA0391  | 0.94 |
| NM_017586    | C9ORF7    | 0.94 | NM_015465 | GEMIN5    | 0.94 |
| NM_014077    | FAM32A    | 0.94 | NM_016025 | DREV1     | 0.94 |
| XM_166138    | ANKRD16   | 0.94 | NM_017830 | OCIA      | 0.94 |
| NM_023036    | DNAI2     | 0.94 | NM_031207 | HT036     | 0.94 |
| NM_032589    | DSCR8     | 0.94 | NM_033201 | BC008967  | 0.94 |
| NM_145283    | C9ORF121  | 0.94 | XM_113696 | LOC196337 | 0.94 |
| XM_090844    | TMEM30B   | 0.94 | NM_173609 | C15ORF21  | 0.94 |
| NM_207475    | FLJ90680  | 0.94 | XM_091830 | LOC162835 | 0.94 |
| XM_372762    | LOC391002 | 0.94 | XM_374067 | LOC389185 | 0.94 |
| XM_380148    | LOC402598 | 0.94 | XM_376774 | LOC401460 | 0.94 |
| XM_380121    | LOC402538 | 0.94 | XM_374880 | LOC399888 | 0.94 |
| NM_001005515 | OR5H15    | 0.94 | NM_004938 | DAPK1     | 0.95 |
| NM_006871    | RIPK3     | 0.95 | NM_153834 | GPR112    | 0.95 |
| NM_024012    | HTR5A     | 0.95 | NM_022436 | ABCG5     | 0.95 |
| NM_022131    | CLSTN2    | 0.95 | NM_002155 | HSPA6     | 0.95 |
| NM_005098    | MSC       | 0.95 | NM_002022 | FMO4      | 0.95 |
| NM_004190    | LIPF      | 0.95 | NM_004663 | RAB11A    | 0.95 |
| NM_153012    | TNFSF12   | 0.95 | NM_000939 | POMC      | 0.95 |
| NM_005679    | TAF1C     | 0.95 | NM_001966 | EHHADH    | 0.95 |
| NM_004738    | VAPB      | 0.95 | NM_004280 | EEF1E1    | 0.95 |
| NM_003826    | NAPG      | 0.95 | XM_045712 | PDZK10    | 0.95 |
| NM_007261    | CMRF-35H  | 0.95 | XM_046808 | NFASC     | 0.95 |
| XM_041964    | KIAA0523  | 0.95 | NM_014296 | CAPN7     | 0.95 |
| NM_014476    | PDLIM3    | 0.95 | NM_019023 | PRMT7     | 0.95 |
| NM_017802    | FLJ20397  | 0.95 | NM_017974 | APG16L    | 0.95 |
| NM_017740    | ZDHHC7    | 0.95 | NM_018914 | PCDHGA11  | 0.95 |
| NM_024605    | FLJ20896  | 0.95 | NM_032132 | NOHMA     | 0.95 |
| NM_032355    | MGC13272  | 0.95 | NM_178124 | LOC91966  | 0.95 |
| NM_152269    | FLJ38663  | 0.95 | NM_182511 | CBLN2     | 0.95 |
| NM_130387    | ASB14     | 0.95 | XM_086761 | LOC150084 | 0.95 |

|           |           |      |              |               |      |
|-----------|-----------|------|--------------|---------------|------|
| NM_153358 | FLJ90396  | 0.95 | NM_144973    | MGC24039      | 0.95 |
| NM_181720 | LOC257106 | 0.95 | NM_178514    | LOC283487     | 0.95 |
| XM_379011 | C21ORF130 | 0.95 | NM_173681    | NOS3AS        | 0.95 |
| XM_371540 | UNQ2430   | 0.95 | NM_198520    | FLJ44112      | 0.95 |
| XM_208080 | LOC283368 | 0.95 | XM_376056    | LOC400954     | 0.95 |
| XM_379174 | LOC401051 | 0.95 | XM_372396    | LOC390158     | 0.95 |
| NM_003836 | DLK1      | 0.96 | NM_018660    | ZNF395        | 0.96 |
| NM_000598 | IGFBP3    | 0.96 | NM_003019    | SFTPD         | 0.96 |
| NM_002658 | PLAU      | 0.96 | NM_017582    | UBE2Q         | 0.96 |
| NM_014555 | TRPM5     | 0.96 | NM_002834    | PTPN11        | 0.96 |
| NM_080679 | COL11A2   | 0.96 | NM_001156    | ANXA7         | 0.96 |
| NM_006891 | CRYGD     | 0.96 | NM_015895    | GMNN          | 0.96 |
| NM_005113 | GOLGA5    | 0.96 | NM_012365    | OR2A5         | 0.96 |
| NM_001899 | CST4      | 0.96 | NM_002241    | KCNJ10        | 0.96 |
| NM_006122 | MAN2A2    | 0.96 | NM_005930    | MGEA6         | 0.96 |
| NM_004602 | STAU      | 0.96 | NM_005660    | SLC35A2       | 0.96 |
| NM_003562 | SLC25A11  | 0.96 | NM_004808    | NMT2          | 0.96 |
| NM_003803 | MYOM1     | 0.96 | NM_005875    | GC20          | 0.96 |
| NM_007057 | ZWINT     | 0.96 | NM_007190    | SEC23IP       | 0.96 |
| NM_015047 | KIAA0090  | 0.96 | NM_015433    | DKFZP586D0919 | 0.96 |
| NM_016494 | LOC51255  | 0.96 | NM_019065    | EFCBP2        | 0.96 |
| NM_017578 | ROPN1     | 0.96 | NM_018003    | UACA          | 0.96 |
| NM_198271 | LMOD3     | 0.96 | NM_018845    | LOC55974      | 0.96 |
| NM_022467 | CHST8     | 0.96 | NM_015513    | CRELD1        | 0.96 |
| NM_022143 | LRRC4     | 0.96 | NM_025261    | LY6G6C        | 0.96 |
| NM_024493 | ZNF306    | 0.96 | NM_031427    | C14ORF168     | 0.96 |
| NM_031461 | LOC83690  | 0.96 | NM_033185    | KRTAP3-3      | 0.96 |
| XM_376186 | LOC93463  | 0.96 | NM_153344    | C6ORF141      | 0.96 |
| NM_153225 | RPESP     | 0.96 | NM_145287    | ZNF519        | 0.96 |
| NM_198403 | PAQR10    | 0.96 | NM_173617    | FLJ36701      | 0.96 |
| NM_173649 | FLJ40172  | 0.96 | XM_293745    | LOC345222     | 0.96 |
| XM_117548 | LOC203413 | 0.96 | XM_290185    | LOC338598     | 0.96 |
| XM_372958 | LOC391445 | 0.96 | XM_372371    | LOC390084     | 0.96 |
| XM_372591 | LOC390638 | 0.96 | NM_001006604 | LOC387646     | 0.96 |
| NM_000623 | BDKRB2    | 0.97 | NM_000188    | HK1           | 0.97 |
| NM_031866 | FZD8      | 0.97 | NM_000933    | PLCB4         | 0.97 |
| NM_013274 | POLL      | 0.97 | NM_003141    | SSA1          | 0.97 |
| NM_015074 | KIF1B     | 0.97 | NM_002127    | HLA-G         | 0.97 |
| NM_000926 | PGR       | 0.97 | NM_014685    | HERPUD1       | 0.97 |
| NM_014808 | FARP2     | 0.97 | NM_000231    | SGCG          | 0.97 |
| NM_000711 | BGLAP     | 0.97 | NM_001143    | AMELY         | 0.97 |
| NM_000992 | RPL29     | 0.97 | NM_024855    | ACTR5         | 0.97 |
| NM_032604 | ABHD1     | 0.97 | NM_014797    | ZBTB24        | 0.97 |
| NM_005768 | C3F       | 0.97 | NM_014343    | CLDN15        | 0.97 |
| NM_017770 | ELOVL2    | 0.97 | NM_018382    | FLJ11292      | 0.97 |
| NM_018355 | ZNF415    | 0.97 | XM_166320    | KIAA1553      | 0.97 |

|           |           |      |              |           |      |
|-----------|-----------|------|--------------|-----------|------|
| NM_021803 | IL21      | 0.97 | NM_024525    | TTC13     | 0.97 |
| NM_030934 | C1ORF25   | 0.97 | NM_138428    | LOC113444 | 0.97 |
| NM_152304 | MGC45806  | 0.97 | NM_183376    | ARRDC4    | 0.97 |
| NM_172364 | CACNA2D4  | 0.97 | NM_145280    | LOC151194 | 0.97 |
| NM_014068 | PSORS1C1  | 0.97 | NM_182578    | FLJ37964  | 0.97 |
| NM_182580 | CYB561D1  | 0.97 | XM_209719    | LOC285679 | 0.97 |
| NM_199343 | FLJ90637  | 0.97 | XM_210543    | LOC285253 | 0.97 |
| XM_375747 | LOC400760 | 0.97 | XM_373039    | LOC391714 | 0.97 |
| XM_379656 | LOC401543 | 0.97 | NM_001004476 | OR10K2    | 0.97 |
| NM_018890 | RAC1      | 0.98 | NM_005508    | CCR4      | 0.98 |
| NM_004821 | HAND1     | 0.98 | NM_003960    | NAT8      | 0.98 |
| NM_002770 | PRSS2     | 0.98 | NM_006624    | ZMYND11   | 0.98 |
| NM_005751 | AKAP9     | 0.98 | NM_006914    | RORB      | 0.98 |
| NM_018647 | TNFRSF19  | 0.98 | NM_005559    | LAMA1     | 0.98 |
| NM_001631 | ALPI      | 0.98 | NM_018004    | FLJ10134  | 0.98 |
| NM_003018 | SFTPC     | 0.98 | NM_002003    | FCN1      | 0.98 |
| NM_004171 | SLC1A2    | 0.98 | NM_004745    | DLGAP2    | 0.98 |
| NM_014870 | KIAA0478  | 0.98 | NM_006446    | SLCO1B1   | 0.98 |
| NM_014959 | CARD8     | 0.98 | NM_022163    | MRPL46    | 0.98 |
| NM_016099 | GOLGA7    | 0.98 | NM_017447    | C21ORF91  | 0.98 |
| NM_017520 | HSMPP8    | 0.98 | NM_017843    | BCAS4     | 0.98 |
| NM_020401 | NUP107    | 0.98 | NM_024906    | SCD4      | 0.98 |
| NM_144582 | TEX261    | 0.98 | NM_145266    | LOC134492 | 0.98 |
| NM_138285 | LOC129401 | 0.98 | XM_015334    | FAM10A3   | 0.98 |
| NM_194304 | LOC283031 | 0.98 | NM_178553    | MGC44505  | 0.98 |
| NM_207505 | FLJ45248  | 0.98 | NM_207446    | LOC400451 | 0.98 |
| XM_062300 | LOC120824 | 0.98 | XM_061864    | LOC120105 | 0.98 |
| XM_376576 | LOC401308 | 0.98 | NM_001005239 | OR11H1    | 0.98 |
| NM_032165 | LRRIQ1    | 0.98 | NM_015076    | CDK11     | 0.99 |
| NM_005318 | H1FO      | 0.99 | XM_084482    | ARID5B    | 0.99 |
| NM_005953 | MT2A      | 0.99 | NM_003409    | ZFP161    | 0.99 |
| NM_006147 | IRF6      | 0.99 | NM_002524    | NRAS      | 0.99 |
| NM_006095 | ATP8A1    | 0.99 | NM_153615    | RGR       | 0.99 |
| NM_000796 | DRD3      | 0.99 | NM_017683    | C20ORF23  | 0.99 |
| XM_374879 | LOC114971 | 0.99 | NM_001243    | TNFRSF8   | 0.99 |
| NM_000874 | IFNAR2    | 0.99 | NM_000176    | NR3C1     | 0.99 |
| NM_003820 | TNFRSF14  | 0.99 | NM_002315    | LMO1      | 0.99 |
| NM_024013 | IFNA1     | 0.99 | NM_005399    | PRKAB2    | 0.99 |
| NM_002889 | RARRES2   | 0.99 | NM_005080    | XBP1      | 0.99 |
| NM_001284 | AP3S1     | 0.99 | NM_000847    | GSTA3     | 0.99 |
| NM_006061 | CRISP3    | 0.99 | NM_006571    | DCTN6     | 0.99 |
| NM_014989 | RIMS1     | 0.99 | NM_014165    | C6ORF66   | 0.99 |
| NM_012390 | PROL5     | 0.99 | NM_017694    | FLJ20160  | 0.99 |
| NM_018384 | IAN4L1    | 0.99 | NM_020674    | CYP20A1   | 0.99 |
| XM_370660 | KIAA1201  | 0.99 | NM_021821    | MRPS35    | 0.99 |
| NM_022765 | NICAL     | 0.99 | NM_024077    | SECISBP2  | 0.99 |

|           |           |      |           |           |      |
|-----------|-----------|------|-----------|-----------|------|
| NM_152310 | ELOVL3    | 0.99 | NM_080474 | SERPINB12 | 0.99 |
| NM_152271 | FLJ23749  | 0.99 | XM_376436 | LOC134466 | 0.99 |
| NM_144615 | MGC23244  | 0.99 | NM_181842 | ZBTB12    | 0.99 |
| NM_181512 | MRPL21    | 0.99 | XM_291335 | LOC340542 | 0.99 |
| XM_379060 | LOC339685 | 0.99 | NM_178011 | LRRTM3    | 0.99 |
| NM_198581 | ZC3HDC6   | 0.99 | XM_374150 | LOC389345 | 0.99 |
| XM_373700 | LOC388305 | 0.99 | XM_371170 | LOC388545 | 0.99 |
| XM_373775 | LOC388467 | 0.99 | XM_373669 | LOC388220 | 0.99 |
| NM_002637 | PHKA1     | 1    | NM_002029 | FPR1      | 1    |
| NM_032787 | GPR128    | 1    | NM_130760 | MADCAM1   | 1    |
| NM_001564 | ING1L     | 1    | NM_000450 | SELE      | 1    |
| NM_000071 | CBS       | 1    | NM_014881 | DCLRE1A   | 1    |
| NM_014899 | RHOBTB3   | 1    | NM_004264 | SURB7     | 1    |
| NM_002559 | P2RX3     | 1    | NM_001169 | AQP8      | 1    |
| NM_001270 | CHD1      | 1    | NM_000060 | BTD       | 1    |
| AJ277481  | ILK-2     | 1    | NM_005614 | RHEB      | 1    |
| NM_000606 | C8G       | 1    | NM_033423 | GZMH      | 1    |
| NM_002949 | MRPL12    | 1    | NM_012128 | CLCA4     | 1    |
| NM_016310 | POLR3K    | 1    | NM_018293 | FLJ10997  | 1    |
| NM_018919 | PCDHGA6   | 1    | NM_020130 | C8ORF4    | 1    |
| XM_031104 | GALNTL1   | 1    | NM_021820 | C6ORF75   | 1    |
| NM_024043 | MGC3101   | 1    | NM_032808 | LRRN6A    | 1    |
| NM_052950 | WDFY2     | 1    | XM_058997 | LOC126167 | 1    |
| NM_144663 | 37196     | 1    | NM_014406 | CESK1     | 1    |
| NM_152494 | DCST1     | 1    | NM_182755 | LOC220929 | 1    |
| NM_178527 | MGC43026  | 1    | NM_182579 | FLJ40343  | 1    |
| NM_199183 | TESSP5    | 1    | XM_370726 | LOC387927 | 1    |
| XM_209616 | LOC285453 | 1    | XM_292717 | LOC342850 | 1    |
| XM_371208 | LOC388581 | 1    | XM_373844 | LOC388635 | 1    |
| XM_370686 | LOC387849 | 1    | XM_373926 | LOC388814 | 1    |
| NM_002578 | PAK3      | 1.01 | NM_005377 | MYCL2     | 1.01 |
| NM_005653 | TFCP2     | 1.01 | NM_000113 | DYT1      | 1.01 |
| NM_030955 | ADAMTS12  | 1.01 | NM_005800 | C13ORF22  | 1.01 |
| NM_003122 | SPINK1    | 1.01 | NM_005070 | SLC4A3    | 1.01 |
| NM_003311 | PHLDA2    | 1.01 | NM_002444 | MSN       | 1.01 |
| NM_012140 | SLC25A10  | 1.01 | NM_002255 | KIR2DL4   | 1.01 |
| NM_006952 | UPK1B     | 1.01 | NM_182490 | ZNF227    | 1.01 |
| NM_004896 | VPS26     | 1.01 | NM_004272 | HOMER1    | 1.01 |
| NM_015435 | RNF19     | 1.01 | NM_015567 | SLITRK5   | 1.01 |
| NM_024335 | IRX6      | 1.01 | NM_024674 | LIN28     | 1.01 |
| NM_031958 | KRTAP3-1  | 1.01 | XM_030300 | UNC5A     | 1.01 |
| NM_130783 | LOC90139  | 1.01 | XM_376280 | LOC152078 | 1.01 |
| NM_152519 | FLJ23861  | 1.01 | NM_207496 | C6ORF214  | 1.01 |
| XM_292023 | LOC341356 | 1.01 | XM_373461 | LOC387683 | 1.01 |
| XM_373521 | LOC387826 | 1.01 | XM_380025 | LOC402681 | 1.01 |
| XM_496631 | FLJ35107  | 1.02 | NM_002749 | MAPK7     | 1.02 |



|           |              |      |              |           |      |
|-----------|--------------|------|--------------|-----------|------|
| NM_003629 | PIK3R3       | 1.02 | NM_004934    | CDH18     | 1.02 |
| NM_003805 | CRADD        | 1.02 | NM_021622    | PLEKHA1   | 1.02 |
| NM_006756 | TCEA1        | 1.02 | NM_024407    | NDUFS7    | 1.02 |
| NM_006415 | SPTLC1       | 1.02 | NM_017677    | MTMR8     | 1.02 |
| NM_022909 | CENPH        | 1.02 | NM_024608    | NEIL1     | 1.02 |
| NM_014221 | MTCP1        | 1.02 | NM_000608    | ORM2      | 1.02 |
| NM_004910 | PITPNM1      | 1.02 | NM_004695    | SLC16A5   | 1.02 |
| NM_006393 | NEBL         | 1.02 | NM_013284    | POLM      | 1.02 |
| NM_018987 | SEMA5B       | 1.02 | NM_019009    | TOLLIP    | 1.02 |
| NM_018192 | LEPREL1      | 1.02 | NM_021639    | SP192     | 1.02 |
| NM_031488 | L3MBTL2      | 1.02 | NM_032229    | SLITRK6   | 1.02 |
| NM_178838 | LOC90768     | 1.02 | NM_145648    | SLC15A4   | 1.02 |
| NM_014770 | CENTG1       | 1.02 | NM_033296    | PGR1      | 1.02 |
| NM_152554 | C6ORF195     | 1.02 | NM_152574    | C9ORF52   | 1.02 |
| NM_133328 | DEDD2        | 1.02 | XM_377060    | LOC203547 | 1.02 |
| NM_174940 | LOC283232    | 1.02 | NM_174981    | ANKRD21   | 1.02 |
| NM_175857 | KRTAP8-1     | 1.02 | NM_173684    | FLJ35721  | 1.02 |
| NM_207407 | FLJ16046     | 1.02 | NM_032583    | ABCC11    | 1.02 |
| XM_059689 | LOC134111    | 1.02 | XM_294077    | LOC346157 | 1.02 |
| XM_376872 | LOC401529    | 1.02 | XM_372367    | LOC390079 | 1.02 |
| XM_374333 | LOC389878    | 1.02 | NM_001004354 | MGC61598  | 1.02 |
| NM_005009 | NME4         | 1.03 | NM_014397    | NEK6      | 1.03 |
| NM_005239 | ETS2         | 1.03 | NM_003223    | TFAP4     | 1.03 |
| NM_006768 | BRAP         | 1.03 | NM_052939    | FCRH3     | 1.03 |
| NM_000485 | APRT         | 1.03 | NM_173859    | BASE      | 1.03 |
| NM_013326 | C18ORF8      | 1.03 | NM_006133    | C11ORF11  | 1.03 |
| NM_000942 | PPIB         | 1.03 | NM_000943    | PPIC      | 1.03 |
| NM_006190 | ORC2L        | 1.03 | NM_006223    | PIN4      | 1.03 |
| NM_005808 | CTDSPL       | 1.03 | XM_374779    | ANKRD26   | 1.03 |
| NM_014462 | LSM1         | 1.03 | NM_015718    | NOX3      | 1.03 |
| NM_020217 | DKFZP5471014 | 1.03 | NM_020909    | EPB41L5   | 1.03 |
| NM_017963 | KIAA1295     | 1.03 | NM_018153    | ANTXR1    | 1.03 |
| NM_032219 | FLJ22269     | 1.03 | NM_032117    | GAJ       | 1.03 |
| NM_138343 | KNSL8        | 1.03 | NM_173079    | RUNDC1    | 1.03 |
| NM_198450 | UNQ8193      | 1.03 | XM_379705    | LOC158572 | 1.03 |
| XM_370690 | ARID2        | 1.03 | NM_001001664 | LOC339745 | 1.03 |
| XM_209408 | LOC284901    | 1.03 | XM_374100    | LOC389248 | 1.03 |
| XM_379939 | LOC402604    | 1.03 | XM_372753    | LOC390980 | 1.03 |
| XM_373714 | LOC388338    | 1.03 | NM_001823    | CKB       | 1.04 |
| XM_038150 | MAST3        | 1.04 | NM_001778    | CD48      | 1.04 |
| NM_004328 | BCS1L        | 1.04 | NM_006494    | ERF       | 1.04 |
| NM_003083 | SNAPC2       | 1.04 | NM_006012    | CLPP      | 1.04 |
| NM_001948 | DUT          | 1.04 | XM_050846    | IHH       | 1.04 |
| NM_006681 | NMU          | 1.04 | NM_002906    | RDX       | 1.04 |
| NM_012076 | CRB1         | 1.04 | NM_000047    | ARSE      | 1.04 |
| AF073924  | OR7E35P      | 1.04 | NM_000280    | PAX6      | 1.04 |

|              |           |      |           |               |      |
|--------------|-----------|------|-----------|---------------|------|
| NM_000345    | SNCA      | 1.04 | NM_173075 | APBB2         | 1.04 |
| NM_001539    | DNAJA1    | 1.04 | NM_002404 | MFAP4         | 1.04 |
| NM_015423    | AASDHPPT  | 1.04 | NM_022735 | ACBD3         | 1.04 |
| NM_006753    | SURF6     | 1.04 | NM_014821 | KIAA0317      | 1.04 |
| NM_007210    | GALNT6    | 1.04 | NM_015607 | DKFZP547E1010 | 1.04 |
| NM_012453    | TBL2      | 1.04 | NM_016321 | RHCG          | 1.04 |
| NM_016470    | C20ORF111 | 1.04 | NM_017948 | NOL8          | 1.04 |
| NM_017920    | URG4      | 1.04 | NM_020647 | JPH1          | 1.04 |
| NM_021817    | HAPLN2    | 1.04 | XM_029084 | FLJ21438      | 1.04 |
| NM_024854    | FLJ22028  | 1.04 | NM_025030 | FLJ20972      | 1.04 |
| NM_025073    | FLJ21168  | 1.04 | NM_144576 | FLJ32452      | 1.04 |
| NM_152363    | FLJ39369  | 1.04 | NM_144643 | FLJ30655      | 1.04 |
| NM_198466    | FLJ37183  | 1.04 | NM_152793 | ELLS1         | 1.04 |
| NM_182592    | FLJ39576  | 1.04 | XM_067176 | LOC131055     | 1.04 |
| XM_372042    | LOC389660 | 1.04 | XM_372469 | LOC390342     | 1.04 |
| XM_379720    | LOC401613 | 1.04 | NM_000586 | IL2           | 1.05 |
| NM_170699    | GPBAR1    | 1.05 | NM_006763 | BTG2          | 1.05 |
| NM_033329    | SIGLECL1  | 1.05 | NM_016123 | IRAK4         | 1.05 |
| NM_002303    | LEPR      | 1.05 | NM_000629 | IFNAR1        | 1.05 |
| XM_094581    | SEC24A    | 1.05 | NM_012403 | ANP32C        | 1.05 |
| NM_005564    | LCN2      | 1.05 | NM_147127 | EVC2          | 1.05 |
| NM_001177    | ARL1      | 1.05 | NM_022444 | SLC13A1       | 1.05 |
| NM_005454    | CER1      | 1.05 | NM_012297 | G3BP2         | 1.05 |
| NM_006371    | CRTAP     | 1.05 | NM_152943 | ZNF268        | 1.05 |
| NM_013336    | SEC61A1   | 1.05 | NM_016498 | HSPC242       | 1.05 |
| NM_018112    | C9ORF87   | 1.05 | NM_018001 | FLJ10120      | 1.05 |
| NM_018206    | VPS35     | 1.05 | XM_290799 | ARHGAP23      | 1.05 |
| NM_022068    | FAM38B    | 1.05 | NM_152456 | MGC34647      | 1.05 |
| NM_152595    | PGBD4     | 1.05 | XM_378734 | LOC284214     | 1.05 |
| XM_379085    | LOC285043 | 1.05 | XM_208545 | LOC283155     | 1.05 |
| XM_377766    | LOC402103 | 1.05 | XM_380141 | LOC402590     | 1.05 |
| XM_372418    | LOC390213 | 1.05 | XM_370844 | LOC388094     | 1.05 |
| NM_001001437 | MGC12815  | 1.05 | NM_003618 | MAP4K3        | 1.06 |
| NM_000685    | AGTR1     | 1.06 | NM_000838 | GRM1          | 1.06 |
| NM_004276    | CABP1     | 1.06 | NM_013375 | ABT1          | 1.06 |
| NM_207305    | FOXD4     | 1.06 | NM_000941 | POR           | 1.06 |
| NM_006601    | TEBP      | 1.06 | NM_030773 | TUBB1         | 1.06 |
| NM_016561    | BFAR      | 1.06 | NM_003592 | CUL1          | 1.06 |
| NM_052938    | FCRH1     | 1.06 | NM_000825 | GNRH1         | 1.06 |
| NM_001766    | CD1D      | 1.06 | NM_021975 | RELA          | 1.06 |
| NM_022112    | P53AIP1   | 1.06 | NM_004078 | CSRP1         | 1.06 |
| NM_152992    | POMZP3    | 1.06 | NM_001862 | COX5B         | 1.06 |
| NM_000723    | CACNB1    | 1.06 | NM_001475 | GAGE5         | 1.06 |
| NM_207288    | AAA1      | 1.06 | NM_005999 | TSNAX         | 1.06 |
| NM_004753    | DHRS3     | 1.06 | NM_005491 | CXORF6        | 1.06 |
| NM_005714    | KCNK7     | 1.06 | NM_006610 | MASP2         | 1.06 |

|           |              |      |           |              |      |
|-----------|--------------|------|-----------|--------------|------|
| NM_006541 | TXNL2        | 1.06 | NM_014160 | MKRN2        | 1.06 |
| NM_012463 | ATP6V0A2     | 1.06 | NM_013358 | PADI1        | 1.06 |
| NM_017971 | MRPL20       | 1.06 | NM_018148 | WINS1        | 1.06 |
| NM_018289 | FLJ10979     | 1.06 | NM_018442 | PC326        | 1.06 |
| NM_020803 | KLHL8        | 1.06 | NM_020901 | KIAA1542     | 1.06 |
| NM_022831 | FLJ12806     | 1.06 | NM_022901 | LRRC19       | 1.06 |
| NM_025184 | FLJ22843     | 1.06 | NM_025049 | C15ORF20     | 1.06 |
| XM_290462 | LRRC27       | 1.06 | NM_032884 | MGC15882     | 1.06 |
| NM_080928 | ASB15        | 1.06 | NM_152474 | C19ORF18     | 1.06 |
| NM_197956 | C9ORF90      | 1.06 | XM_372289 | CYORF15A     | 1.06 |
| NM_207378 | SERPINA13    | 1.06 | NM_207009 | LOC404636    | 1.06 |
| XM_087671 | LOC153441    | 1.06 | XM_379234 | LOC401101    | 1.06 |
| XM_374267 | LOC389654    | 1.06 | XM_372573 | LOC390594    | 1.06 |
| XM_370826 | LOC388065    | 1.06 | NM_000144 | FRDA         | 1.07 |
| NM_004873 | BAG5         | 1.07 | NM_005402 | RALA         | 1.07 |
| NM_007145 | ZNF146       | 1.07 | NM_005590 | MRE11A       | 1.07 |
| NM_016000 | TRNT1        | 1.07 | NM_004330 | BNIP2        | 1.07 |
| NM_001199 | BMP1         | 1.07 | NM_000880 | IL7          | 1.07 |
| NM_001142 | AMELX        | 1.07 | NM_000670 | ADH4         | 1.07 |
| NM_004454 | ETV5         | 1.07 | NM_014947 | FOXJ3        | 1.07 |
| NM_014465 | SULT1B1      | 1.07 | NM_001263 | CDS1         | 1.07 |
| NM_001389 | DSCAM        | 1.07 | NM_012393 | PFAS         | 1.07 |
| NM_023928 | AACS         | 1.07 | NM_004775 | B4GALT6      | 1.07 |
| NM_007219 | RNF24        | 1.07 | NM_014900 | COBLL1       | 1.07 |
| NM_152268 | DKFZP727A071 | 1.07 | NM_013231 | FLRT2        | 1.07 |
| NM_013235 | RNASE3L      | 1.07 | NM_020312 | DKFZP434K046 | 1.07 |
| NM_022451 | C10ORF117    | 1.07 | NM_024955 | FLJ23322     | 1.07 |
| NM_030578 | MGC4093      | 1.07 | NM_025080 | ASRGL1       | 1.07 |
| NM_032350 | MGC11257     | 1.07 | NM_032268 | ZNRF1        | 1.07 |
| NM_033271 | BTBD6        | 1.07 | NM_018538 | ERMAP        | 1.07 |
| XM_058961 | TRAPPC5      | 1.07 | NM_138705 | CAGLP        | 1.07 |
| NM_145312 | ZNF485       | 1.07 | NM_148676 | DSCR10       | 1.07 |
| NM_182581 | LOC284680    | 1.07 | NM_198828 | LOC375449    | 1.07 |
| NM_199046 | TEPP         | 1.07 | NM_198585 | UNQ2492      | 1.07 |
| XM_293225 | LOC343854    | 1.07 | XM_084672 | LOC143941    | 1.07 |
| XM_373845 | LOC388638    | 1.07 | XM_374110 | LOC389268    | 1.07 |
| XM_374146 | LOC389339    | 1.07 | XM_378080 | LOC402377    | 1.07 |
| XM_376800 | LOC401483    | 1.07 | XM_373344 | LOC392459    | 1.07 |
| NM_006772 | SYNGAP1      | 1.07 | NM_002953 | RPS6KA1      | 1.08 |
| NM_020371 | AVEN         | 1.08 | NM_020806 | GPHN         | 1.08 |
| NM_003071 | SMARCA3      | 1.08 | NM_004520 | KIF2         | 1.08 |
| NM_018984 | SSH1         | 1.08 | NM_004370 | COL12A1      | 1.08 |
| NM_145058 | MGC7036      | 1.08 | NM_198141 | GANC         | 1.08 |
| NM_003918 | GYG2         | 1.08 | NM_003774 | GALNT4       | 1.08 |
| NM_014846 | KIAA0196     | 1.08 | NM_148674 | SMC1L2       | 1.08 |
| NM_018724 | IL20         | 1.08 | NM_022338 | C11ORF24     | 1.08 |

|              |               |      |              |               |      |
|--------------|---------------|------|--------------|---------------|------|
| NM_017810    | ZNF434        | 1.08 | XM_040527    | TNN           | 1.08 |
| NM_024616    | FLJ23186      | 1.08 | NM_024768    | FLJ12057      | 1.08 |
| NM_024928    | OBFC1         | 1.08 | NM_032267    | RGSL2         | 1.08 |
| NM_052935    | MGC20781      | 1.08 | NM_080622    | C20ORF135     | 1.08 |
| NM_147202    | C9ORF25       | 1.08 | NM_173804    | MGC30208      | 1.08 |
| XM_378516    | LOC255177     | 1.08 | XM_166090    | PLAC9         | 1.08 |
| NM_173629    | C18ORF26      | 1.08 | XM_064903    | LOC126017     | 1.08 |
| XM_061930    | LOC120237     | 1.08 | XM_375845    | LOC400807     | 1.08 |
| XM_373277    | LOC392288     | 1.08 | NM_031464    | RPS6KL1       | 1.09 |
| NM_153024    | FLJ31393      | 1.09 | NM_054031    | MGRX3         | 1.09 |
| NM_005533    | IFI35         | 1.09 | NM_015001    | SHARP         | 1.09 |
| NM_000367    | TPMT          | 1.09 | NM_003341    | UBE2E1        | 1.09 |
| NM_001551    | IGBP1         | 1.09 | NM_001305    | CLDN4         | 1.09 |
| NM_138694    | PKHD1         | 1.09 | XM_053074    | TIMM50        | 1.09 |
| AL117555     | DKFZP564I1171 | 1.09 | NM_007267    | EVER1         | 1.09 |
| NM_012396    | PHLDA3        | 1.09 | NM_177453    | PAQR3         | 1.09 |
| NM_006947    | SRP72         | 1.09 | NM_021141    | XRCC5         | 1.09 |
| NM_004479    | FUT7          | 1.09 | NM_007245    | A2LP          | 1.09 |
| NM_006520    | TCTE1L        | 1.09 | NM_004703    | RABEP1        | 1.09 |
| NM_005816    | CD96          | 1.09 | NM_007009    | ZPBP          | 1.09 |
| NM_007244    | PRR4          | 1.09 | NM_014396    | VPS41         | 1.09 |
| NM_022064    | RNF123        | 1.09 | NM_022151    | MOAP1         | 1.09 |
| NM_030790    | CDA08         | 1.09 | NM_025114    | FLJ13615      | 1.09 |
| NM_030799    | SMAP-5        | 1.09 | NM_032812    | PLXDC2        | 1.09 |
| NM_147189    | MGC39325      | 1.09 | NM_133375    | MGC4562       | 1.09 |
| NM_145806    | ZNF511        | 1.09 | NM_182494    | FAM26A        | 1.09 |
| NM_152416    | MGC40214      | 1.09 | NM_152457    | ZNF597        | 1.09 |
| NM_152606    | ZNF540        | 1.09 | XM_373847    | LOC339468     | 1.09 |
| NM_173834    | MGC21416      | 1.09 | XM_291623    | LOC343521     | 1.09 |
| NM_207440    | FLJ26443      | 1.09 | XM_208234    | LOC284672     | 1.09 |
| XM_059438    | LOC130502     | 1.09 | XM_166805    | LOC219417     | 1.09 |
| XM_374694    | LOC393062     | 1.09 | XM_379820    | LOC402490     | 1.09 |
| XM_372428    | LOC390243     | 1.09 | XM_375152    | LOC400304     | 1.09 |
| XM_372730    | LOC390937     | 1.09 | XM_371106    | LOC388458     | 1.09 |
| NM_001005216 | OR2J3         | 1.09 | NM_001001912 | OR4E2         | 1.09 |
| NM_032030    | FKSG83        | 1.1  | NM_005517    | HMG2          | 1.1  |
| NM_000474    | TWIST1        | 1.1  | NM_080385    | CPA5          | 1.1  |
| NM_004832    | GSTO1         | 1.1  | NM_004236    | TRIP15        | 1.1  |
| NM_000267    | NF1           | 1.1  | NM_012204    | GTF3C4        | 1.1  |
| NM_004128    | GTF2F2        | 1.1  | NM_015255    | C6ORF133      | 1.1  |
| NM_021950    | MS4A1         | 1.1  | NM_002986    | CCL11         | 1.1  |
| NM_001250    | TNFRSF5       | 1.1  | NM_004060    | CCNG1         | 1.1  |
| NM_007029    | STMN2         | 1.1  | NM_001483    | GBAS          | 1.1  |
| NM_014371    | AKAP8L        | 1.1  | NM_015472    | TAZ           | 1.1  |
| NM_015383    | DJ328E19.C1.1 | 1.1  | NM_015577    | RAI14         | 1.1  |
| NM_015949    | C7ORF20       | 1.1  | NM_017566    | DKFZP434G0522 | 1.1  |

|              |              |      |           |               |      |
|--------------|--------------|------|-----------|---------------|------|
| NM_017914    | C19ORF24     | 1.1  | NM_016205 | PDGFC         | 1.1  |
| XM_166372    | LRFN2        | 1.1  | NM_032799 | ZDHHC12       | 1.1  |
| NM_032623    | OSAP         | 1.1  | NM_033253 | NT5C1B        | 1.1  |
| NM_058173    | LOC118430    | 1.1  | NM_152385 | FLJ31438      | 1.1  |
| NM_173501    | LOC146174    | 1.1  | NM_012364 | OR1Q1         | 1.1  |
| NM_205849    | FAM9B        | 1.1  | NM_144972 | MGC23940      | 1.1  |
| NM_173538    | FLJ35802     | 1.1  | NM_145297 | ZNF626        | 1.1  |
| XM_379044    | LOC284898    | 1.1  | XM_291020 | LOC339809     | 1.1  |
| NM_020880    | ZNF530       | 1.1  | NM_207488 | FLJ42393      | 1.1  |
| XM_378798    | LOC400690    | 1.1  | NM_030911 | CDADC1        | 1.11 |
| NM_002650    | PIK4CA       | 1.11 | NM_001702 | BAI1          | 1.11 |
| NM_003506    | FZD6         | 1.11 | NM_001508 | GPR39         | 1.11 |
| NM_001572    | IRF7         | 1.11 | NM_004608 | TBX6          | 1.11 |
| NM_006521    | TFE3         | 1.11 | NM_016286 | DCXR          | 1.11 |
| NM_015328    | KIAA0828     | 1.11 | NM_014554 | SENP1         | 1.11 |
| NM_020345    | NKIRAS1      | 1.11 | NM_004788 | UBE4A         | 1.11 |
| NM_002185    | IL7R         | 1.11 | NM_052918 | SORCS1        | 1.11 |
| NM_000747    | CHRN1        | 1.11 | NM_002292 | LAMB2         | 1.11 |
| NM_004518    | KCNQ2        | 1.11 | NM_005698 | SCAMP3        | 1.11 |
| NM_003542    | HIST1H4C     | 1.11 | NM_005320 | HIST1H1D      | 1.11 |
| NM_022070    | ABC1         | 1.11 | XM_092995 | ZNF21         | 1.11 |
| NM_005814    | GPA33        | 1.11 | NM_007049 | BTN2A1        | 1.11 |
| NM_007253    | CYP4F8       | 1.11 | XM_085028 | ATP11A        | 1.11 |
| XM_050561    | SIN3B        | 1.11 | NM_015430 | DKFZP586H2123 | 1.11 |
| NM_016062    | CGI-128      | 1.11 | NM_016366 | CABP2         | 1.11 |
| NM_018103    | LRRRC5       | 1.11 | NM_017828 | COMMD4        | 1.11 |
| XM_371832    | KIAA1411     | 1.11 | NM_021179 | LOC57821      | 1.11 |
| NM_022734    | FLJ20859     | 1.11 | NM_022843 | PCDH20        | 1.11 |
| NM_030769    | NPL          | 1.11 | XM_291262 | ZNF251        | 1.11 |
| NM_138801    | GALM         | 1.11 | XM_087137 | LOC151242     | 1.11 |
| NM_182699    | DDX53        | 1.11 | NM_152912 | MTIF3         | 1.11 |
| NM_194439    | LOC285498    | 1.11 | XM_292674 | LOC342669     | 1.11 |
| XM_371304    | LOC388687    | 1.11 | XM_376278 | LOC401095     | 1.11 |
| XM_373078    | LOC391767    | 1.11 | XM_378981 | LOC400846     | 1.11 |
| NM_001001700 | FLJ45966     | 1.11 | XM_373950 | LOC388887     | 1.11 |
| NM_001570    | IRAK2        | 1.12 | NM_002742 | PRKCM         | 1.12 |
| NM_004850    | ROCK2        | 1.12 | NM_173858 | VN1R5         | 1.12 |
| NM_014371    | AKAP8L       | 1.12 | NM_005598 | NHLH1         | 1.12 |
| NM_003423    | ZNF43        | 1.12 | NM_001132 | AFG3L1        | 1.12 |
| NM_005134    | PPP4R1       | 1.12 | NM_002990 | CCL22         | 1.12 |
| NM_007183    | PKP3         | 1.12 | XM_088463 | AEGP          | 1.12 |
| NM_032383    | HPS3         | 1.12 | NR_000039 | RAB9P1        | 1.12 |
| NM_006138    | MS4A3        | 1.12 | NM_006390 | IPO8          | 1.12 |
| NM_015263    | RC3          | 1.12 | NM_015516 | E2IG4         | 1.12 |
| XM_046264    | DKFZP434B172 | 1.12 | NM_018976 | SLC38A2       | 1.12 |
| NM_019005    | FLJ20323     | 1.12 | NM_023948 | MOSPD3        | 1.12 |

|              |               |      |           |               |      |
|--------------|---------------|------|-----------|---------------|------|
| XM_051200    | FTO           | 1.12 | NM_024532 | PF20          | 1.12 |
| NM_024761    | MOBKL2B       | 1.12 | NM_030920 | ANP32E        | 1.12 |
| NM_032129    | DKFZP434H2010 | 1.12 | XM_059987 | ANKRD19       | 1.12 |
| NM_033267    | IRX2          | 1.12 | NM_182541 | TMEM31        | 1.12 |
| NM_173581    | FLJ90231      | 1.12 | NM_207413 | UNQ9433       | 1.12 |
| XM_086308    | LOC148766     | 1.12 | XM_374191 | LOC389443     | 1.12 |
| XM_378028    | LOC402336     | 1.12 | XM_379997 | LOC402643     | 1.12 |
| XM_373915    | LOC388798     | 1.12 | NM_000222 | KIT           | 1.13 |
| NM_002556    | OSBP          | 1.13 | NM_001674 | ATF3          | 1.13 |
| NM_014212    | HOXC11        | 1.13 | NM_014588 | VSX1          | 1.13 |
| NM_006411    | AGPAT1        | 1.13 | NM_016434 | RTEL1         | 1.13 |
| NM_016577    | RAB6B         | 1.13 | NM_004411 | DNCI1         | 1.13 |
| NM_005154    | USP8          | 1.13 | NM_005060 | RORC          | 1.13 |
| NM_000088    | COL1A1        | 1.13 | NM_003246 | THBS1         | 1.13 |
| NM_020363    | DAZZ          | 1.13 | NM_006016 | CD164         | 1.13 |
| NM_002006    | FGF2          | 1.13 | NM_014556 | EVC           | 1.13 |
| NM_138731    | MIPOL1        | 1.13 | NM_002242 | KCNJ13        | 1.13 |
| NM_014563    | SEDL          | 1.13 | NM_014628 | MAD2L1BP      | 1.13 |
| NM_005887    | DLEU1         | 1.13 | NM_199069 | DKFZP564J0123 | 1.13 |
| NM_024510    | MGC4368       | 1.13 | NM_024840 | ZNF613        | 1.13 |
| NM_033034    | TRIM5         | 1.13 | NM_152351 | SLC5A10       | 1.13 |
| XM_378312    | LOC283143     | 1.13 | NM_203305 | MGC50853      | 1.13 |
| XM_210035    | LOC286408     | 1.13 | XM_379118 | LOC400992     | 1.13 |
| XM_374061    | LOC389167     | 1.13 | XM_370536 | LOC387642     | 1.13 |
| XM_370664    | LOC387816     | 1.13 | NM_004635 | MAPKAPK3      | 1.14 |
| NM_006218    | PIK3CA        | 1.14 | NM_001401 | EDG2          | 1.14 |
| NM_012375    | OR52A1        | 1.14 | NM_013381 | TRHDE         | 1.14 |
| NM_000369    | TSHR          | 1.14 | NM_022041 | GAN           | 1.14 |
| NM_014516    | CNOT3         | 1.14 | NM_007107 | SSR3          | 1.14 |
| NM_002502    | NFKB2         | 1.14 | NM_000026 | ADSL          | 1.14 |
| NM_002225    | IVD           | 1.14 | NM_000496 | CRYBB2        | 1.14 |
| NM_006136    | CAPZA2        | 1.14 | NM_005755 | EBI3          | 1.14 |
| NM_001094    | ACCN1         | 1.14 | NM_004529 | MLLT3         | 1.14 |
| NM_002679    | PMS2L2        | 1.14 | NM_005396 | PNLIPRP2      | 1.14 |
| NM_021143    | ZNF20         | 1.14 | XM_085507 | ZNF500        | 1.14 |
| NM_017918    | FLJ20647      | 1.14 | NM_018370 | FLJ11259      | 1.14 |
| NM_018242    | FLJ10847      | 1.14 | NM_033326 | SOX6          | 1.14 |
| NM_024548    | FLJ23047      | 1.14 | NM_025057 | C14ORF45      | 1.14 |
| NM_031941    | USHBP1        | 1.14 | NM_147174 | HS6ST2        | 1.14 |
| NM_178829    | C7ORF34       | 1.14 | NM_152994 | LOC129285     | 1.14 |
| NM_144666    | FLJ32752      | 1.14 | NM_153714 | C10ORF67      | 1.14 |
| NM_175858    | KRTAP11-1     | 1.14 | NM_207484 | FLJ40712      | 1.14 |
| NM_003519    | HIST1H2BL     | 1.14 | XM_292889 | LOC344022     | 1.14 |
| XM_374060    | LOC389166     | 1.14 | XM_374168 | LOC389392     | 1.14 |
| XM_372614    | LOC390683     | 1.14 | XM_371014 | LOC388333     | 1.14 |
| NM_001005466 | OR10G2        | 1.14 | NM_031303 | KATNAL2       | 1.14 |

|           |           |      |              |              |      |
|-----------|-----------|------|--------------|--------------|------|
| NM_005160 | ADRBK2    | 1.15 | NM_000167    | GK           | 1.15 |
| NM_015715 | PLA2G3    | 1.15 | NM_006627    | POP4         | 1.15 |
| NM_016147 | PME-1     | 1.15 | NM_001494    | GDI2         | 1.15 |
| NM_002002 | FCER2     | 1.15 | NM_145298    | APOBEC3F     | 1.15 |
| NM_002270 | TNPO1     | 1.15 | NM_000491    | C1QB         | 1.15 |
| NM_005342 | HMGB3     | 1.15 | NM_005271    | GLUD1        | 1.15 |
| NM_000246 | MHC2TA    | 1.15 | NM_006145    | DNAJB1       | 1.15 |
| NM_002728 | PRG2      | 1.15 | NM_006926    | SFTPA2       | 1.15 |
| NM_024551 | ADIPOR2   | 1.15 | NM_003052    | SLC34A1      | 1.15 |
| NM_003928 | CXX1      | 1.15 | NM_014940    | HSRG1        | 1.15 |
| NM_016612 | MSCP      | 1.15 | NM_024021    | MS4A4A       | 1.15 |
| NM_015888 | HOOK1     | 1.15 | NM_018087    | FLJ10407     | 1.15 |
| NM_020648 | TWSG1     | 1.15 | NM_022728    | NEUROD6      | 1.15 |
| NM_024848 | FLJ13941  | 1.15 | NM_024850    | BTNL8        | 1.15 |
| NM_033503 | BMF       | 1.15 | NM_145170    | TTC18        | 1.15 |
| NM_181708 | LOC144233 | 1.15 | NM_173539    | ZNF596       | 1.15 |
| NM_152744 | SDK1      | 1.15 | NM_207343    | DKFZP547C195 | 1.15 |
| NM_205850 | SLC24A5   | 1.15 | XM_373109    | LOC340156    | 1.15 |
| XM_372117 | PTAR1     | 1.15 | NM_182635    | LOC349236    | 1.15 |
| XM_371626 | LOC389107 | 1.15 | XM_376049    | LOC400950    | 1.15 |
| XM_377305 | LOC401740 | 1.15 | NM_016083    | CNR1         | 1.16 |
| NM_002432 | MNDA      | 1.16 | NM_005997    | TCFL1        | 1.16 |
| NM_002662 | PLD1      | 1.16 | NM_000403    | GALE         | 1.16 |
| NM_001304 | CPD       | 1.16 | NM_001083    | PDE5A        | 1.16 |
| NM_003102 | SOD3      | 1.16 | NM_020241    | SEMA6B       | 1.16 |
| NM_000216 | KAL1      | 1.16 | XM_371850    | C6orf103     | 1.16 |
| NM_020381 | C6ORF210  | 1.16 | NM_002879    | RAD52        | 1.16 |
| NM_012286 | MORF4L2   | 1.16 | NM_016512    | SPAG11       | 1.16 |
| NM_006456 | SIAT7B    | 1.16 | NM_015246    | MGRN1        | 1.16 |
| NM_022157 | RRAGC     | 1.16 | NM_024622    | FLJ21901     | 1.16 |
| NM_030788 | DCSTAMP   | 1.16 | NM_030971    | BA108L7.2    | 1.16 |
| NM_032302 | MGC10911  | 1.16 | NM_032558    | FLJ14753     | 1.16 |
| NM_052862 | MK2S4     | 1.16 | NM_198149    | C1ORF40      | 1.16 |
| NM_173514 | FLJ90709  | 1.16 | NM_152604    | ZNF383       | 1.16 |
| NM_183242 | BTBD8     | 1.16 | XM_211908    | LOC285479    | 1.16 |
| XM_062285 | LOC120775 | 1.16 | XM_378349    | LOC400019    | 1.16 |
| XM_372705 | LOC390877 | 1.16 | NM_001004344 | MGC44328     | 1.16 |
| XM_372248 | LOC389888 | 1.16 | XM_379702    | LOC401585    | 1.16 |
| NM_014240 | LIMD1     | 1.17 | NM_005946    | MT1A         | 1.17 |
| NM_006410 | HTATIP2   | 1.17 | NM_000821    | GGCX         | 1.17 |
| NM_015350 | TA-LRRP   | 1.17 | NM_004399    | DDX11        | 1.17 |
| NM_006406 | PRDX4     | 1.17 | NM_020416    | PPP2R2C      | 1.17 |
| NM_007026 | DUSP14    | 1.17 | NM_016651    | DACT1        | 1.17 |
| NM_005164 | ABCD2     | 1.17 | NM_016428    | ABI3         | 1.17 |
| NM_021082 | SLC15A2   | 1.17 | NM_003447    | ZNF165       | 1.17 |
| NM_021996 | GBGT1     | 1.17 | NM_014583    | LMCD1        | 1.17 |

|              |           |      |              |           |      |
|--------------|-----------|------|--------------|-----------|------|
| NM_017766    | FLJ20321  | 1.17 | NM_018316    | FLJ11078  | 1.17 |
| NM_022730    | COPS7B    | 1.17 | NM_024952    | C14ORF159 | 1.17 |
| NM_030961    | TRIM56    | 1.17 | NM_031215    | CABLES2   | 1.17 |
| NM_032861    | SERAC1    | 1.17 | NM_033414    | ZNF622    | 1.17 |
| NM_144565    | NIP       | 1.17 | NM_033184    | KRTAP2-4  | 1.17 |
| NM_178453    | MGC52282  | 1.17 | NM_033259    | CAM-KIIN  | 1.17 |
| NM_001008274 | LOC493829 | 1.17 | XM_209700    | LOC285647 | 1.17 |
| XM_378879    | LOC400763 | 1.17 | XM_375604    | LOC400689 | 1.17 |
| XM_378758    | LOC400660 | 1.17 | NM_001005224 | OR4F3     | 1.17 |
| NM_001005496 | OR5D16    | 1.17 | NM_022049    | GPR88     | 1.18 |
| NM_000038    | APC       | 1.18 | NM_005985    | SNAI1     | 1.18 |
| NM_005220    | DLX3      | 1.18 | NM_005240    | ETV3      | 1.18 |
| NM_001754    | RUNX1     | 1.18 | NM_002337    | LRPAP1    | 1.18 |
| NM_021724    | NR1D1     | 1.18 | NM_014427    | CPNE7     | 1.18 |
| NM_017913    | CDC37L1   | 1.18 | NM_016203    | PRKAG2    | 1.18 |
| NM_004528    | MGST3     | 1.18 | NM_001082    | CYP4F2    | 1.18 |
| NM_024419    | PGS1      | 1.18 | NM_007263    | COPE      | 1.18 |
| XM_028522    | MYR8      | 1.18 | NM_012287    | CENTB2    | 1.18 |
| NM_015933    | HSPC016   | 1.18 | NM_016322    | RAB14     | 1.18 |
| NM_017728    | FLJ20255  | 1.18 | NM_019104    | F25965    | 1.18 |
| NM_032227    | FLJ22679  | 1.18 | NM_030969    | TMEM14B   | 1.18 |
| NM_053043    | MGC20460  | 1.18 | NM_176884    | TAS2R43   | 1.18 |
| NM_173682    | FLJ40288  | 1.18 | NM_014096    | SLC43A3   | 1.18 |
| XM_292210    | LOC338870 | 1.18 | XM_293029    | CDKL4     | 1.18 |
| XM_292678    | LOC339291 | 1.18 | XM_372040    | LOC389652 | 1.18 |
| XM_376003    | LOC400924 | 1.18 | NM_005286    | GPR8      | 1.19 |
| NM_006980    | MTERF     | 1.19 | NM_020249    | ADAMTS9   | 1.19 |
| XM_290898    | DUSTYPK   | 1.19 | XM_496642    | USP19     | 1.19 |
| NM_004810    | GRAP2     | 1.19 | NM_001294    | CLPTM1    | 1.19 |
| NM_002490    | NDUFA6    | 1.19 | NM_014657    | KIAA0406  | 1.19 |
| NM_014434    | NDOR1     | 1.19 | NM_018340    | FLJ11151  | 1.19 |
| NM_020219    | CEAL1     | 1.19 | NM_024730    | FLJ22655  | 1.19 |
| NM_024770    | FLJ13984  | 1.19 | NM_024863    | FLJ21174  | 1.19 |
| NM_175875    | SIX5      | 1.19 | NM_144714    | FLJ25449  | 1.19 |
| NM_144967    | FLJ30058  | 1.19 | NM_173798    | LOC170261 | 1.19 |
| NM_145665    | SPANXE    | 1.19 | NM_139285    | GAR17     | 1.19 |
| NM_173572    | C10ORF93  | 1.19 | NM_207489    | FLJ35816  | 1.19 |
| NM_004312    | ARR3      | 1.19 | XM_373826    | LOC388593 | 1.19 |
| XM_372761    | LOC391001 | 1.19 | XM_380117    | LOC402532 | 1.19 |
| XM_370715    | LOC387911 | 1.19 | XM_370949    | LOC388229 | 1.19 |
| NM_004579    | MAP4K2    | 1.2  | NM_006055    | LANCL1    | 1.2  |
| NM_001908    | CTSB      | 1.2  | NM_012213    | MLYCD     | 1.2  |
| NM_016155    | MMP17     | 1.2  | NM_173536    | GABRG1    | 1.2  |
| NM_005069    | SIM2      | 1.2  | NM_001038    | SCNN1A    | 1.2  |
| NM_005566    | LDHA      | 1.2  | NM_001678    | ATP1B2    | 1.2  |
| NM_005273    | GNB2      | 1.2  | NM_022568    | ALDH8A1   | 1.2  |



|           |           |      |           |           |      |
|-----------|-----------|------|-----------|-----------|------|
| NM_002971 | SATB1     | 1.2  | NM_024923 | NUP210    | 1.2  |
| NM_020850 | RANBP10   | 1.2  | NM_024621 | FLJ12604  | 1.2  |
| NM_032714 | C14orf151 | 1.2  | NM_138379 | LOC91937  | 1.2  |
| NM_198441 | FLJ40296  | 1.2  | NM_153006 | NAGS      | 1.2  |
| NM_178230 | COAS2     | 1.2  | NM_153756 | FNDC5     | 1.2  |
| NM_173808 | NEGR1     | 1.2  | NM_173812 | FLJ32949  | 1.2  |
| NM_182563 | MGC21830  | 1.2  | NM_172311 | SALF      | 1.2  |
| XM_371670 | LOC389158 | 1.2  | XM_374372 | LOC392238 | 1.2  |
| XM_374286 | LOC389695 | 1.2  | XM_370648 | LOC387804 | 1.2  |
| XM_377000 | LOC401589 | 1.2  | NM_005443 | PAPSS1    | 1.21 |
| NM_001505 | GPR30     | 1.21 | NM_016945 | TAS2R16   | 1.21 |
| NM_031891 | CDH20     | 1.21 | NM_138960 | TGIF2LX   | 1.21 |
| NM_015369 | TP53TG3   | 1.21 | NM_133368 | KIAA1972  | 1.21 |
| NM_014671 | UBE3C     | 1.21 | NM_004449 | ERG       | 1.21 |
| NM_022725 | FANCF     | 1.21 | NM_005578 | LPP       | 1.21 |
| NM_003596 | TPST1     | 1.21 | NM_016341 | PLCE1     | 1.21 |
| NM_017846 | SECP43    | 1.21 | NM_018670 | MESP1     | 1.21 |
| NM_032111 | MRPL14    | 1.21 | NM_024310 | PLEKHF1   | 1.21 |
| NM_031964 | KRTAP17-1 | 1.21 | NM_032373 | RNF159    | 1.21 |
| XM_028810 | KIAA1755  | 1.21 | NM_175871 | FLJ35119  | 1.21 |
| NM_138286 | LOC148213 | 1.21 | XM_378823 | LOC148413 | 1.21 |
| NM_152742 | GPC2      | 1.21 | NM_213601 | LOC283578 | 1.21 |
| XM_370838 | LOC339005 | 1.21 | XM_293580 | GPR149    | 1.21 |
| XM_292027 | LOC341370 | 1.21 | NM_003681 | PDXK      | 1.22 |
| NM_001048 | SST       | 1.22 | NM_002858 | ABCD3     | 1.22 |
| NM_005524 | HES1      | 1.22 | NM_007265 | HSGT1     | 1.22 |
| NM_012086 | GTF3C3    | 1.22 | NM_001361 | DHODH     | 1.22 |
| NM_002575 | SERPINB2  | 1.22 | NM_019074 | DLL4      | 1.22 |
| NM_014141 | CNTNAP2   | 1.22 | NM_016174 | CEECAM1   | 1.22 |
| NM_032701 | MGC2705   | 1.22 | NM_001836 | CMA1      | 1.22 |
| NM_001864 | COX7A1    | 1.22 | NM_007216 | HPS5      | 1.22 |
| NM_015693 | PDZK6     | 1.22 | XM_168590 | ZRF1      | 1.22 |
| NM_014162 | HSPC072   | 1.22 | NM_153240 | NPHP3     | 1.22 |
| NM_013291 | CPSF1     | 1.22 | NM_016516 | VPS54     | 1.22 |
| NM_018372 | RIF1      | 1.22 | NM_020417 | TBX20     | 1.22 |
| NM_016050 | MRPL11    | 1.22 | NM_022760 | C20ORF81  | 1.22 |
| NM_022474 | MPP5      | 1.22 | NM_023939 | MGC2752   | 1.22 |
| NM_030634 | ZNF436    | 1.22 | NM_025065 | RPF1      | 1.22 |
| NM_133448 | KIAA1944  | 1.22 | NM_138795 | ARL10B    | 1.22 |
| NM_080388 | S100A16   | 1.22 | NM_152458 | FLJ32130  | 1.22 |
| NM_152676 | FBXO15    | 1.22 | NM_198499 | FLJ46156  | 1.22 |
| NM_016206 | FLJ38507  | 1.22 | NM_207477 | FLJ27365  | 1.22 |
| XM_087500 | LOC152667 | 1.22 | XM_372566 | LOC390570 | 1.22 |
| NM_006648 | PRKWNK2   | 1.23 | NM_020680 | SCYL1     | 1.23 |
| NM_178471 | GPR119    | 1.23 | NM_032119 | MASS1     | 1.23 |
| NM_004155 | SERPINB9  | 1.23 | NM_007108 | TCEB2     | 1.23 |

|           |              |      |              |           |      |
|-----------|--------------|------|--------------|-----------|------|
| NM_022476 | FTS          | 1.23 | NM_005525    | HSD11B1   | 1.23 |
| NM_004675 | ARHI         | 1.23 | NM_014330    | PPP1R15A  | 1.23 |
| NM_006157 | NELL1        | 1.23 | NM_003601    | SMARCA5   | 1.23 |
| NM_130466 | UBE3B        | 1.23 | NM_000626    | CD79B     | 1.23 |
| XM_044727 | MTMR7        | 1.23 | NM_006669    | LILRB1    | 1.23 |
| NM_017541 | CRYGS        | 1.23 | NM_016131    | RAB10     | 1.23 |
| NM_000935 | PLOD2        | 1.23 | NM_003045    | SLC7A1    | 1.23 |
| NM_014678 | KIAA0685     | 1.23 | NM_007246    | KLHL2     | 1.23 |
| NM_015064 | ELKS         | 1.23 | NM_018051    | FLJ10300  | 1.23 |
| NM_017610 | RNF111       | 1.23 | NM_018131    | C10ORF3   | 1.23 |
| NM_018464 | C10ORF70     | 1.23 | NM_022454    | SOX17     | 1.23 |
| NM_024645 | FLJ13842     | 1.23 | NM_052886    | MAL2      | 1.23 |
| NM_178830 | FLJ36888     | 1.23 | NM_144654    | C9ORF116  | 1.23 |
| NM_002936 | RNASEH1      | 1.23 | XM_378946    | LOC400812 | 1.23 |
| XM_371681 | LOC389178    | 1.23 | XM_373548    | LOC387886 | 1.23 |
| XM_373496 | LOC387762    | 1.23 | XM_378562    | LOC400496 | 1.23 |
| XM_352913 | RAB26        | 1.24 | NM_018930    | PCDHB10   | 1.24 |
| NM_005593 | MYF5         | 1.24 | NM_002955    | RREB1     | 1.24 |
| NM_080738 | EDARADD      | 1.24 | NM_003789    | TRADD     | 1.24 |
| NM_003383 | VLDLR        | 1.24 | NM_003980    | MAP7      | 1.24 |
| NM_006185 | NUMA1        | 1.24 | NM_058241    | CCNT2     | 1.24 |
| NM_000152 | GAA          | 1.24 | NM_006737    | KIR3DL2   | 1.24 |
| NM_005468 | NAALADL1     | 1.24 | NM_006779    | CDC42EP2  | 1.24 |
| XM_290546 | KIAA0830     | 1.24 | XM_376895    | ZNF510    | 1.24 |
| NM_017812 | CHCHD3       | 1.24 | XM_035946    | KIAA1613  | 1.24 |
| NM_020753 | CASKIN2      | 1.24 | NM_022490    | PAF53     | 1.24 |
| NM_024038 | MGC2803      | 1.24 | NM_032567    | NYD-TSP1  | 1.24 |
| NM_053000 | TIGA1        | 1.24 | XM_059377    | FLJ40298  | 1.24 |
| NM_178004 | PRIMA1       | 1.24 | XM_379434    | LOC154092 | 1.24 |
| NM_144698 | FLJ25124     | 1.24 | XM_372144    | PHYHD1    | 1.24 |
| NM_182562 | FLJ39743     | 1.24 | NM_181600    | KRTAP13-4 | 1.24 |
| XM_379386 | LOC285768    | 1.24 | XM_371202    | FLJ00038  | 1.24 |
| XM_060301 | LOC127059    | 1.24 | XM_290949    | LOC339553 | 1.24 |
| XM_211557 | LOC284623    | 1.24 | XM_171078    | LOC255324 | 1.24 |
| XM_375018 | LOC400121    | 1.24 | NM_001001966 | OR5AT1    | 1.24 |
| NM_003188 | MAP3K7       | 1.25 | NM_024779    | PIP5K2C   | 1.25 |
| NM_001637 | AOAH         | 1.25 | NM_058167    | UBE2J2    | 1.25 |
| NM_018217 | C20ORF31     | 1.25 | NM_000078    | CETP      | 1.25 |
| NM_005754 | G3BP         | 1.25 | NM_001613    | ACTA2     | 1.25 |
| NM_005047 | PSMD5        | 1.25 | NM_003716    | CADPS     | 1.25 |
| NM_015509 | DKFZP566B183 | 1.25 | NM_018109    | PAPD1     | 1.25 |
| XM_035371 | ZFYVE28      | 1.25 | NM_025106    | SSB1      | 1.25 |
| NM_031433 | MFRP         | 1.25 | NM_032343    | CHCHD6    | 1.25 |
| NM_032709 | C10ORF33     | 1.25 | NM_183238    | ZNF605    | 1.25 |
| NM_144626 | MGC17299     | 1.25 | NM_152505    | C21ORF13  | 1.25 |
| XM_376013 | LOC200321    | 1.25 | NM_198996    | LOC375108 | 1.25 |

|              |               |      |              |           |      |
|--------------|---------------|------|--------------|-----------|------|
| XM_210755    | LOC286365     | 1.25 | XM_379667    | LOC401550 | 1.25 |
| XM_372121    | LOC389764     | 1.25 | XM_378279    | LOC399875 | 1.25 |
| XM_372900    | LOC391322     | 1.25 | XM_373968    | LOC388915 | 1.25 |
| NM_173492    | PIP5KL1       | 1.26 | NM_002377    | MAS1      | 1.26 |
| NM_024342    | GRLF1         | 1.26 | NM_000692    | ALDH1B1   | 1.26 |
| NM_006207    | PDGFRL        | 1.26 | NM_012215    | MGEA5     | 1.26 |
| NM_022366    | TFB2M         | 1.26 | NM_003686    | EXO1      | 1.26 |
| NM_007054    | KIF3A         | 1.26 | NM_021969    | NR0B2     | 1.26 |
| NM_004693    | K6HF          | 1.26 | NM_001846    | COL4A2    | 1.26 |
| NM_006417    | IFI44         | 1.26 | NM_000701    | ATP1A1    | 1.26 |
| NM_000765    | CYP3A7        | 1.26 | NM_002164    | INDO      | 1.26 |
| NM_004173    | SLC7A4        | 1.26 | NM_003166    | SULT1A3   | 1.26 |
| NM_014969    | KIAA0893      | 1.26 | NM_014451    | B1        | 1.26 |
| NM_018940    | PCDHB7        | 1.26 | XM_166451    | KIAA1586  | 1.26 |
| NM_024919    | FRMD1         | 1.26 | NM_152904    | HCMOGT-1  | 1.26 |
| NM_080842    | LOC129026     | 1.26 | NM_173660    | FLJ33718  | 1.26 |
| XM_116980    | LOC197049     | 1.26 | XM_060328    | LOC127099 | 1.26 |
| XM_087762    | LOC153778     | 1.26 | XM_372732    | LOC390940 | 1.26 |
| XM_380019    | LOC402675     | 1.26 | NM_000116    | TAZ       | 1.27 |
| NM_002427    | MMP13         | 1.27 | NM_003119    | SPG7      | 1.27 |
| NM_002869    | RAB6A         | 1.27 | NM_018557    | LRP1B     | 1.27 |
| NM_000342    | SLC4A1        | 1.27 | NM_005002    | NDUFA9    | 1.27 |
| NM_014003    | DHX38         | 1.27 | NM_015200    | KIAA0648  | 1.27 |
| NM_017993    | FLJ10094      | 1.27 | NM_017720    | STAP2     | 1.27 |
| NM_019609    | CPXM          | 1.27 | NM_020870    | SH3MD2    | 1.27 |
| NM_024300    | CHCHD7        | 1.27 | NM_153025    | FLJ31606  | 1.27 |
| NM_145206    | VTI1A         | 1.27 | XM_172341    | FLJ35036  | 1.27 |
| XM_371250    | LOC388630     | 1.27 | XM_379562    | LOC401456 | 1.27 |
| XM_372527    | LOC390488     | 1.27 | XM_373373    | LOC392549 | 1.27 |
| NM_001005217 | FRG2          | 1.27 | NM_001005278 | OR6N2     | 1.27 |
| NM_014840    | ARK5          | 1.28 | NM_004311    | ARL3      | 1.28 |
| NM_080819    | GPR78         | 1.28 | NM_017790    | RGS3      | 1.28 |
| NM_018699    | PRDM5         | 1.28 | NM_004219    | PTTG1     | 1.28 |
| NM_016292    | TRAP1         | 1.28 | NM_005711    | EDIL3     | 1.28 |
| NM_000748    | CHRNB2        | 1.28 | NM_015927    | TGFB111   | 1.28 |
| NM_000313    | PROS1         | 1.28 | NM_021083    | XK        | 1.28 |
| XM_352906    | ACYP1         | 1.28 | NM_004368    | CNN2      | 1.28 |
| NM_001474    | GAGE4         | 1.28 | NM_021638    | AFAP      | 1.28 |
| NM_004232    | SOCS6         | 1.28 | NM_014876    | KIAA0063  | 1.28 |
| NM_014153    | ZC3HDC7       | 1.28 | NM_016558    | SCAND1    | 1.28 |
| NM_018038    | FLJ10246      | 1.28 | NM_022152    | PP1201    | 1.28 |
| NM_030627    | CPEB4         | 1.28 | NM_032016    | STARD3NL  | 1.28 |
| NM_032039    | DKFZP761D0211 | 1.28 | NM_014903    | NAV3      | 1.28 |
| NM_138811    | C7ORF31       | 1.28 | NM_177454    | KIAA1946  | 1.28 |
| NM_152631    | FLJ35782      | 1.28 | XM_296315    | LOC341604 | 1.28 |
| XM_068903    | LOC134541     | 1.28 | XM_169258    | LOC219638 | 1.28 |

|           |              |      |              |           |      |
|-----------|--------------|------|--------------|-----------|------|
| XM_373849 | LOC388643    | 1.28 | XM_371630    | LOC389112 | 1.28 |
| XM_379248 | LOC401112    | 1.28 | NM_001004319 | VHLL      | 1.28 |
| NM_015669 | PCDHB5       | 1.29 | NM_005437    | NCOA4     | 1.29 |
| NM_004952 | EFNA3        | 1.29 | NM_015902    | DD5       | 1.29 |
| NM_012130 | CLDN14       | 1.29 | NM_006790    | TTID      | 1.29 |
| NM_004794 | RAB33A       | 1.29 | NM_001844    | COL2A1    | 1.29 |
| NM_004102 | FABP3        | 1.29 | NM_005981    | SAS       | 1.29 |
| NM_002665 | PLGL         | 1.29 | NM_020963    | MOV10     | 1.29 |
| NM_003272 | TM7SF1       | 1.29 | NM_004909    | TRAG3     | 1.29 |
| NM_012472 | TSLRP        | 1.29 | NM_016617    | UFM1      | 1.29 |
| NM_018057 | SLC6A15      | 1.29 | NM_018107    | RBM23     | 1.29 |
| NM_017984 | ZCWPW1       | 1.29 | NM_015392    | NPDC1     | 1.29 |
| NM_022350 | LRAP         | 1.29 | NM_024771    | FLJ13848  | 1.29 |
| NM_032121 | DKFZP564K142 | 1.29 | NM_033062    | KRTAP4-2  | 1.29 |
| NM_032523 | OSBPL6       | 1.29 | NM_144596    | TTC8      | 1.29 |
| NM_152493 | FLJ25476     | 1.29 | XM_376981    | LOC401581 | 1.29 |
| NM_001522 | GUCY2F       | 1.3  | XM_055866    | LMTK3     | 1.3  |
| NM_003696 | OR6A2        | 1.3  | NM_000561    | GSTM1     | 1.3  |
| NM_001076 | UGT2B15      | 1.3  | NM_001733    | C1R       | 1.3  |
| NM_003891 | PROZ         | 1.3  | NM_004412    | DNMT2     | 1.3  |
| NM_000702 | ATP1A2       | 1.3  | NM_012347    | FBXO9     | 1.3  |
| NM_006504 | PTPRE        | 1.3  | NM_004437    | EPB41     | 1.3  |
| NM_000048 | ASL          | 1.3  | XM_376567    | KIAA1856  | 1.3  |
| NM_002257 | KLK1         | 1.3  | NM_006041    | HS3ST3B1  | 1.3  |
| NM_006615 | CAPN9        | 1.3  | NM_015070    | KIAA0853  | 1.3  |
| NM_012106 | ARL2BP       | 1.3  | NM_014161    | MRPL18    | 1.3  |
| NM_018129 | PNPO         | 1.3  | NM_017666    | SUHW3     | 1.3  |
| NM_021047 | ZNF253       | 1.3  | NM_031462    | CD99L2    | 1.3  |
| NM_032312 | MGC11061     | 1.3  | XM_376684    | LOC93432  | 1.3  |
| NM_145202 | PRAP1        | 1.3  | NM_182498    | MGC51082  | 1.3  |
| NM_152477 | ZNF565       | 1.3  | XM_379378    | LOC401220 | 1.3  |
| XM_379359 | LOC401210    | 1.3  | XM_370992    | LOC388298 | 1.3  |
| XM_371078 | LOC388419    | 1.3  | NM_005104    | BRD2      | 1.31 |
| NM_024876 | ADCK4        | 1.31 | NM_145001    | STK32A    | 1.31 |
| NM_002841 | PTPRG        | 1.31 | NM_001762    | CCT6A     | 1.31 |
| NM_007358 | M96          | 1.31 | NM_006184    | NUCB1     | 1.31 |
| NM_001269 | CHC1         | 1.31 | NM_001710    | BF        | 1.31 |
| NM_000293 | PHKB         | 1.31 | NM_000368    | TSC1      | 1.31 |
| NM_007106 | UBL3         | 1.31 | NM_002836    | PTPRA     | 1.31 |
| NM_021073 | BMP5         | 1.31 | NM_000043    | TNFRSF6   | 1.31 |
| NM_001877 | CR2          | 1.31 | NM_002236    | KCNF1     | 1.31 |
| NM_031157 | HNRPA1       | 1.31 | NM_003706    | PLA2G4C   | 1.31 |
| XM_291001 | MYO7B        | 1.31 | NM_032834    | ALG10     | 1.31 |
| NM_015156 | RCOR1        | 1.31 | NM_013242    | GTL3      | 1.31 |
| XM_098762 | CHD7         | 1.31 | NM_020898    | KIAA1536  | 1.31 |
| NM_024331 | C20ORF121    | 1.31 | NM_024693    | ECHDC3    | 1.31 |

|              |              |      |              |           |      |
|--------------|--------------|------|--------------|-----------|------|
| NM_024881    | SLC35E1      | 1.31 | NM_031426    | C9ORF58   | 1.31 |
| NM_032930    | MGC13040     | 1.31 | NM_054108    | HRLP5     | 1.31 |
| NM_080608    | C20ORF165    | 1.31 | NM_173497    | HECTD2    | 1.31 |
| NM_182523    | MGC61571     | 1.31 | NM_173530    | ZNF610    | 1.31 |
| NM_145305    | LOC203427    | 1.31 | NM_152761    | FLJ25444  | 1.31 |
| NM_173626    | SLC26A11     | 1.31 | NM_001005272 | OR4A5     | 1.31 |
| NM_133494    | NEK7         | 1.32 | NM_002566    | P2RY11    | 1.32 |
| NM_000911    | OPRD1        | 1.32 | NM_015568    | PPP1R16B  | 1.32 |
| NM_014233    | UBTF         | 1.32 | NM_001814    | CTSC      | 1.32 |
| NM_022355    | DPEP2        | 1.32 | NM_004911    | ERP70     | 1.32 |
| NM_001071    | TYMS         | 1.32 | NM_012228    | MSRB      | 1.32 |
| NM_016195    | MPHOSPH1     | 1.32 | NM_033131    | WNT3A     | 1.32 |
| NM_002010    | FGF9         | 1.32 | NM_004195    | TNFRSF18  | 1.32 |
| NM_004519    | KCNQ3        | 1.32 | NM_018158    | SLC4A1AP  | 1.32 |
| NM_052830    | GGTL3        | 1.32 | NM_013361    | ZNF223    | 1.32 |
| NM_003225    | TFF1         | 1.32 | NM_007177    | TU3A      | 1.32 |
| NM_015221    | DNMBP        | 1.32 | NM_016303    | WBP5      | 1.32 |
| NM_019064    | SDK2         | 1.32 | NM_017558    | HYDIN     | 1.32 |
| NM_018686    | CMAS         | 1.32 | NM_024090    | ELOVL6    | 1.32 |
| NM_138364    | LOC90826     | 1.32 | NM_178134    | CYP4Z1    | 1.32 |
| XM_294139    | C6ORF143     | 1.32 | XM_376179    | LOC401034 | 1.32 |
| XM_371374    | LOC388774    | 1.32 | XM_371034    | LOC388361 | 1.32 |
| NM_001005287 | OR2A1        | 1.32 | NM_144624    | KIS       | 1.33 |
| NM_020240    | SPEC2        | 1.33 | NM_001057    | TACR2     | 1.33 |
| NM_004892    | SEC22L1      | 1.33 | NM_005252    | FOS       | 1.33 |
| NM_003859    | DPM1         | 1.33 | NM_016015    | LCMT1     | 1.33 |
| NM_003026    | SH3GL2       | 1.33 | NM_005681    | TAF1A     | 1.33 |
| NM_012222    | MUTYH        | 1.33 | NM_005626    | SFRS4     | 1.33 |
| NM_004894    | C14ORF2      | 1.33 | NM_017893    | SEMA4G    | 1.33 |
| NM_138775    | LOC91801     | 1.33 | XM_071061    | ARID3C    | 1.33 |
| XM_370918    | DKFZP434P162 | 1.33 | NM_173663    | NY-REN-7  | 1.33 |
| XM_379597    | FLJ10489     | 1.33 | XM_060278    | LOC126987 | 1.33 |
| XM_292301    | LOC341912    | 1.33 | XM_293656    | LOC339951 | 1.33 |
| XM_371603    | LOC389085    | 1.33 | NM_022048    | CSNK1G1   | 1.34 |
| NM_000953    | PTGDR        | 1.34 | NM_018904    | PCDHA13   | 1.34 |
| NM_006497    | HIC1         | 1.34 | NM_001329    | CTBP2     | 1.34 |
| NM_005427    | TP73         | 1.34 | NM_002586    | PBX2      | 1.34 |
| NM_001530    | HIF1A        | 1.34 | NM_016614    | TTRAP     | 1.34 |
| NM_005103    | FEZ1         | 1.34 | XM_496845    | LFNG      | 1.34 |
| NM_001116    | ADCY9        | 1.34 | NM_003603    | ARGBP2    | 1.34 |
| NM_005794    | DHRS2        | 1.34 | NM_007020    | U1SNRNPBP | 1.34 |
| NM_014927    | CNKSR2       | 1.34 | NM_020172    | SPPL2B    | 1.34 |
| NM_020191    | MRPS22       | 1.34 | XM_208522    | KIAA1394  | 1.34 |
| NM_020825    | CRAMP1L      | 1.34 | NM_032576    | CYORF15B  | 1.34 |
| NM_198076    | FAM36A       | 1.34 | XM_372038    | FLJ32731  | 1.34 |
| NM_145055    | C18ORF25     | 1.34 | XM_378980    | LOC339568 | 1.34 |

|           |                |      |              |           |      |
|-----------|----------------|------|--------------|-----------|------|
| XM_371691 | LOC389203      | 1.34 | XM_372969    | LOC391475 | 1.34 |
| XM_371230 | LOC388605      | 1.34 | XM_379623    | LOC401492 | 1.34 |
| XM_370704 | LOC387880      | 1.34 | XM_373646    | LOC388170 | 1.34 |
| NM_006180 | NTRK2          | 1.35 | NM_012117    | CBX5      | 1.35 |
| NM_012102 | RERE           | 1.35 | NM_003254    | TIMP1     | 1.35 |
| NM_001165 | BIRC3          | 1.35 | NM_000259    | MYO5A     | 1.35 |
| NM_002846 | PTPRN          | 1.35 | NM_000885    | ITGA4     | 1.35 |
| NM_001672 | ASIP           | 1.35 | NM_001955    | EDN1      | 1.35 |
| NM_017900 | AKIP           | 1.35 | NM_015629    | PRPF31    | 1.35 |
| NM_000699 | AMY2A          | 1.35 | NM_003162    | STRN      | 1.35 |
| NM_004255 | COX5A          | 1.35 | NM_014962    | BTBD3     | 1.35 |
| NM_015192 | PLCB1          | 1.35 | NM_014329    | RCD-8     | 1.35 |
| NM_014475 | DHDH           | 1.35 | NM_017493    | HSN1      | 1.35 |
| NM_018445 | SELS           | 1.35 | NM_032345    | PYM       | 1.35 |
| XM_209234 | DKFZP434E1410  | 1.35 | NM_194072    | HILS1     | 1.35 |
| NM_014413 | HRI            | 1.36 | NM_004103    | PTK2B     | 1.36 |
| NM_012340 | NFATC2         | 1.36 | NM_005269    | GLI       | 1.36 |
| NM_003221 | TFAP2B         | 1.36 | NM_001055    | SULT1A1   | 1.36 |
| NM_004359 | CDC34          | 1.36 | NM_012292    | HA-1      | 1.36 |
| NM_000705 | ATP4B          | 1.36 | NM_001382    | DPAGT1    | 1.36 |
| NM_005964 | MYH10          | 1.36 | NM_003021    | SGTA      | 1.36 |
| NM_031279 | AGXT2L1        | 1.36 | NM_002771    | PRSS3     | 1.36 |
| NM_005046 | KLK7           | 1.36 | NM_014798    | PLEKHM1   | 1.36 |
| NM_014887 | PFAAP5         | 1.36 | NM_014953    | KIAA1008  | 1.36 |
| NM_015634 | KIAA1279       | 1.36 | NM_021253    | TRIM39    | 1.36 |
| NM_018928 | PCDHGC4        | 1.36 | NM_020851    | KIAA1465  | 1.36 |
| NM_024546 | C13ORF7        | 1.36 | NM_198086    | JUB       | 1.36 |
| NM_177964 | LOC130576      | 1.36 | NM_148960    | CLDN19    | 1.36 |
| NM_152545 | RASGEF1B       | 1.36 | XM_373973    | LOC388923 | 1.36 |
| NM_003582 | DYRK3          | 1.37 | NM_004834    | MAP4K4    | 1.37 |
| NM_015725 | RDH8           | 1.37 | NM_012157    | FBXL2     | 1.37 |
| NM_016638 | ARL6IP4        | 1.37 | NM_000290    | PGAM2     | 1.37 |
| NM_005610 | RBBP4          | 1.37 | XM_376007    | DEPDC5    | 1.37 |
| NM_014792 | KIAA0125       | 1.37 | XM_051017    | KIAA0657  | 1.37 |
| NM_020742 | NLGN4X         | 1.37 | NM_032181    | FLJ13391  | 1.37 |
| NM_172251 | MRPL54         | 1.37 | NM_198462    | FLJ46154  | 1.37 |
| NM_145017 | FLJ32771       | 1.37 | NM_194298    | SLC16A9   | 1.37 |
| NM_178537 | BETA4GALNAC-T4 | 1.37 | XM_376845    | FLJ30435  | 1.37 |
| XM_211871 | LOC285382      | 1.37 | XM_208859    | LOC283816 | 1.37 |
| XM_208438 | LOC286495      | 1.37 | XM_372777    | LOC391030 | 1.37 |
| XM_371655 | LOC389137      | 1.37 | NM_001001417 | LOC414059 | 1.37 |
| NM_015353 | KCTD2          | 1.37 | NM_005923    | MAP3K5    | 1.38 |
| NM_004720 | EDG4           | 1.38 | NM_015872    | ZFP67     | 1.38 |
| NM_000446 | PON1           | 1.38 | NM_012428    | SDFR1     | 1.38 |
| NM_003771 | KRTHA6         | 1.38 | NM_000084    | CLCN5     | 1.38 |
| NM_000392 | ABCC2          | 1.38 | NM_001618    | PARP1     | 1.38 |

|           |           |      |              |              |      |
|-----------|-----------|------|--------------|--------------|------|
| XM_370635 | KIAA0280  | 1.38 | NM_018386    | FLJ11305     | 1.38 |
| NM_023039 | ANKRA2    | 1.38 | NM_032361    | THOC3        | 1.38 |
| NM_152460 | FLJ31882  | 1.38 | NM_194292    | DKFZP761A078 | 1.38 |
| NM_207418 | MGC57827  | 1.38 | XM_117100    | LOC201484    | 1.38 |
| XM_377756 | LOC402095 | 1.38 | XM_374056    | LOC389160    | 1.38 |
| XM_374140 | LOC389331 | 1.38 | XM_371718    | LOC389246    | 1.38 |
| XM_379628 | LOC401499 | 1.38 | NM_213608    | UNQ6411      | 1.38 |
| NM_005858 | AKAP8     | 1.39 | NM_145259    | ACVR1C       | 1.39 |
| NM_002062 | GLP1R     | 1.39 | NM_007129    | ZIC2         | 1.39 |
| NM_030756 | TCF7L2    | 1.39 | NM_002601    | PDE6D        | 1.39 |
| NM_020935 | USP37     | 1.39 | NM_025209    | EPC1         | 1.39 |
| NM_000592 | C4B       | 1.39 | NM_024629    | KLIP1        | 1.39 |
| NM_007345 | ZNF236    | 1.39 | NM_005770    | SERF2        | 1.39 |
| NM_014856 | KIAA0476  | 1.39 | NM_019088    | PD2          | 1.39 |
| NM_024717 | FLJ22344  | 1.39 | NM_032359    | MGC4308      | 1.39 |
| NM_178857 | RP1L1     | 1.39 | NM_138421    | LOC113174    | 1.39 |
| XM_168583 | MUC17     | 1.39 | NM_152522    | MGC33864     | 1.39 |
| NM_173554 | C10ORF107 | 1.39 | NM_207186    | OR10A4       | 1.39 |
| XM_211028 | LOC283403 | 1.39 | NM_178340    | APRG1        | 1.39 |
| XM_291268 | GRINA     | 1.39 | XM_062025    | LOC120364    | 1.39 |
| XM_066585 | LOC139263 | 1.39 | NM_006639    | CYSLTR1      | 1.4  |
| NM_000315 | PTH       | 1.4  | NM_000912    | OPRK1        | 1.4  |
| NM_004214 | FIBP      | 1.4  | NM_181844    | BCL6B        | 1.4  |
| NM_023078 | PYCR1     | 1.4  | NM_000546    | TP53         | 1.4  |
| NM_000557 | GDF5      | 1.4  | NM_005036    | PPARA        | 1.4  |
| NM_007371 | BRD3      | 1.4  | NM_002307    | LGALS7       | 1.4  |
| NM_033262 | SLC8A3    | 1.4  | NM_005074    | SLC17A1      | 1.4  |
| NM_004649 | C21ORF33  | 1.4  | NM_001001434 | STX16        | 1.4  |
| NM_018219 | FLJ10786  | 1.4  | NM_024093    | MGC5509      | 1.4  |
| NM_016647 | LOC51337  | 1.4  | XM_173140    | LOC253254    | 1.4  |
| NM_001625 | AK2       | 1.41 | NM_021624    | HRH4         | 1.41 |
| NM_018907 | PCDHA4    | 1.41 | NM_003220    | TFAP2A       | 1.41 |
| NM_006120 | HLA-DMA   | 1.41 | NM_004912    | CCM1         | 1.41 |
| NM_139178 | DEPC-1    | 1.41 | NM_000835    | GRIN2C       | 1.41 |
| NM_020197 | SMYD2     | 1.41 | NM_001468    | GAGE1        | 1.41 |
| NM_004588 | SCN2B     | 1.41 | NM_012133    | COPG2        | 1.41 |
| NM_017776 | FLJ20344  | 1.41 | NM_018921    | PCDHGA9      | 1.41 |
| NM_052851 | STARD13   | 1.41 | NM_052937    | LOC115294    | 1.41 |
| NM_144684 | MGC32104  | 1.41 | NM_173854    | SLC41A1      | 1.41 |
| NM_207427 | LOC399851 | 1.41 | XM_374655    | LOC392997    | 1.41 |
| XM_373778 | LOC388477 | 1.41 | NM_001001418 | MGC44903     | 1.41 |
| NM_000958 | PTGER4    | 1.42 | NM_030908    | OR2A4        | 1.42 |
| NM_004095 | EIF4EBP1  | 1.42 | NM_014786    | ARHGEF17     | 1.42 |
| NM_001457 | FLNB      | 1.42 | NM_018937    | PCDHB3       | 1.42 |
| NM_018667 | SMPD3     | 1.42 | NM_001064    | TKT          | 1.42 |
| NM_001173 | ARHGAP5   | 1.42 | NM_006010    | ARMET        | 1.42 |

|              |              |      |              |               |      |
|--------------|--------------|------|--------------|---------------|------|
| NM_025252    | RAPH1        | 1.42 | NM_003043    | SLC6A6        | 1.42 |
| NM_006757    | TNNT3        | 1.42 | NM_006344    | CLECSF14      | 1.42 |
| NM_015101    | C1ORF17      | 1.42 | NM_145200    | CABP4         | 1.42 |
| NM_020918    | GPAM         | 1.42 | NM_022773    | FLJ12681      | 1.42 |
| NM_031476    | DKFZP434B044 | 1.42 | NM_032527    | KIAA1847      | 1.42 |
| NM_144774    | SMCR5        | 1.42 | NM_152569    | C9ORF66       | 1.42 |
| XM_374600    | LOC392862    | 1.42 | XM_370639    | LOC387791     | 1.42 |
| XM_370991    | LOC388297    | 1.42 | NM_001005289 | OR52H1        | 1.42 |
| NM_001005492 | OR5J2        | 1.42 | NM_001798    | CDK2          | 1.43 |
| NM_024504    | PRDM14       | 1.43 | NM_004497    | FOXA3         | 1.43 |
| NM_002384    | MBD1         | 1.43 | NM_000855    | GUCY1A2       | 1.43 |
| NM_004402    | DFFB         | 1.43 | NM_001256    | CDC27         | 1.43 |
| NM_002571    | PAEP         | 1.43 | NM_014736    | KIAA0101      | 1.43 |
| NM_006576    | AVIL         | 1.43 | NM_015033    | FNBP1         | 1.43 |
| XM_371891    | KIAA0877     | 1.43 | NM_014173    | HSPC142       | 1.43 |
| AF120323     | TIAM2        | 1.43 | NM_016274    | CKIP-1        | 1.43 |
| NM_018995    | MOV10L1      | 1.43 | NM_017924    | C14ORF119     | 1.43 |
| NM_017944    | USP47        | 1.43 | NM_023935    | C20ORF116     | 1.43 |
| NM_032452    | JPH4         | 1.43 | NM_032819    | ZNF341        | 1.43 |
| NM_032845    | FLJ14816     | 1.43 | XM_044062    | DKFZP761O2018 | 1.43 |
| NM_178160    | OTOP2        | 1.43 | NM_152670    | FLJ25369      | 1.43 |
| XM_211460    | LOC284434    | 1.43 | XM_170909    | LOC257177     | 1.43 |
| XM_117268    | LOC200731    | 1.43 | XM_373561    | LOC387915     | 1.43 |
| NM_001006607 | LOC474170    | 1.43 | NM_020439    | CAMK1G        | 1.44 |
| NM_001221    | CAMK2D       | 1.44 | NM_018323    | PI4K2B        | 1.44 |
| NM_033101    | LGALS12      | 1.44 | NM_003317    | TITF1         | 1.44 |
| NM_003032    | SIAT1        | 1.44 | NM_014220    | TM4SF1        | 1.44 |
| NM_004530    | MMP2         | 1.44 | NM_177417    | KLC2L         | 1.44 |
| NM_022832    | USP46        | 1.44 | NM_199336    | DKFZP434N062  | 1.44 |
| NM_001927    | DES          | 1.44 | NM_019013    | FAM64A        | 1.44 |
| NM_001425    | EMP3         | 1.44 | NM_003156    | STIM1         | 1.44 |
| NM_004890    | SPAG7        | 1.44 | NM_005107    | ENDOGL1       | 1.44 |
| NM_019006    | AWP1         | 1.44 | NM_017602    | DKFZP761A052  | 1.44 |
| NM_018180    | DHX32        | 1.44 | NM_020318    | PLAC3         | 1.44 |
| NM_021215    | C20ORF77     | 1.44 | NM_024727    | FLJ23259      | 1.44 |
| NM_024315    | C7ORF23      | 1.44 | NM_031305    | ARHGAP24      | 1.44 |
| NM_052874    | STX1B2       | 1.44 | NM_144623    | FLJ32784      | 1.44 |
| NM_145028    | C6ORF81      | 1.44 | NM_178128    | LOC283985     | 1.44 |
| NM_206912    | C6ORF216     | 1.44 | NM_203452    | MGC39545      | 1.44 |
| XM_373035    | LOC391705    | 1.44 | XM_372473    | LOC390352     | 1.44 |
| XM_378685    | LOC400605    | 1.44 | NM_001841    | CNR2          | 1.45 |
| NM_014946    | SPG4         | 1.45 | NM_005270    | GLI2          | 1.45 |
| NM_001439    | EXTL2        | 1.45 | NM_016262    | TUBE1         | 1.45 |
| NM_145809    | LOC220594    | 1.45 | NM_000395    | CSF2RB        | 1.45 |
| NM_001945    | DTR          | 1.45 | NM_000171    | GLRA1         | 1.45 |
| NM_004324    | BAX          | 1.45 | NM_004291    | CART          | 1.45 |



|           |           |      |           |              |      |
|-----------|-----------|------|-----------|--------------|------|
| NM_004895 | CIAS1     | 1.45 | NM_014622 | LOH11CR2A    | 1.45 |
| NM_002078 | GOLGA4    | 1.45 | XM_371474 | PLXNB2       | 1.45 |
| NM_016306 | DNAJB11   | 1.45 | NM_144736 | PRO1853      | 1.45 |
| NM_018452 | C6ORF35   | 1.45 | NM_033518 | SLC38A5      | 1.45 |
| NM_153010 | C18ORF16  | 1.45 | XM_376440 | LOC285629    | 1.45 |
| XM_371181 | NANOS2    | 1.45 | XM_372349 | LOC390038    | 1.45 |
| NM_004935 | CDK5      | 1.46 | XM_375726 | KIAA0494     | 1.46 |
| NM_003815 | ADAM15    | 1.46 | NM_021252 | RAB18        | 1.46 |
| NM_004762 | PSCD1     | 1.46 | NM_002171 | IFNA10       | 1.46 |
| NM_005486 | TOM1L1    | 1.46 | NM_005821 | NBR2         | 1.46 |
| NM_000198 | HSD3B2    | 1.46 | NM_005727 | TSPAN-1      | 1.46 |
| NM_006370 | VTI1B     | 1.46 | NM_015436 | RCHY1        | 1.46 |
| NM_015896 | ZMYND10   | 1.46 | NM_017423 | GALNT7       | 1.46 |
| NM_020357 | PCNP      | 1.46 | NM_022774 | FLJ21144     | 1.46 |
| NM_024671 | FLJ23436  | 1.46 | NM_025258 | C6ORF27      | 1.46 |
| NM_177532 | RASSF6    | 1.46 | XM_294794 | LOC339065    | 1.46 |
| XM_371829 | LOC389405 | 1.46 | XM_044630 | DKFZP434C131 | 1.47 |
| NM_021813 | BACH2     | 1.47 | NM_020310 | MNT          | 1.47 |
| NM_000635 | RFX2      | 1.47 | NM_015216 | KIAA0433     | 1.47 |
| NM_000236 | LIPC      | 1.47 | NM_031407 | HUWE1        | 1.47 |
| NM_014584 | ERO1L     | 1.47 | NM_005574 | LMO2         | 1.47 |
| NM_002863 | PYGL      | 1.47 | NM_000896 | CYP4F3       | 1.47 |
| NM_004192 | ASMTL     | 1.47 | NM_005886 | KATNB1       | 1.47 |
| NM_014982 | PCNX      | 1.47 | NM_024624 | SMC6L1       | 1.47 |
| NM_024122 | MGC4825   | 1.47 | NM_033200 | BC002942     | 1.47 |
| NM_033254 | BOC       | 1.47 | NM_174926 | MGC17839     | 1.47 |
| NM_178509 | STXBP4    | 1.47 | XM_209155 | LOC284371    | 1.47 |
| NM_207474 | FLJ42953  | 1.47 | XM_374144 | LOC389335    | 1.47 |
| NM_004760 | STK17A    | 1.48 | NM_001706 | BCL6         | 1.48 |
| NM_021964 | ZNF148    | 1.48 | NM_000302 | PLOD         | 1.48 |
| NM_003283 | TNNT1     | 1.48 | NM_006568 | CGRRF1       | 1.48 |
| NM_012310 | KIF4A     | 1.48 | NM_014992 | DAAM1        | 1.48 |
| NM_001866 | COX7B     | 1.48 | NM_033161 | SURF4        | 1.48 |
| NM_003634 | NIPSNAP1  | 1.48 | NM_003720 | DSCR2        | 1.48 |
| NM_015046 | KIAA0625  | 1.48 | NM_014403 | SIAT7D       | 1.48 |
| NM_016048 | CGI-111   | 1.48 | NM_138332 | C21ORF41     | 1.48 |
| NM_024056 | MGC5576   | 1.48 | NM_152307 | FLJ40452     | 1.48 |
| XM_350780 | FAM21C    | 1.48 | XM_370866 | FLJ25756     | 1.48 |
| XM_379474 | LOC401310 | 1.48 | XM_380142 | LOC402591    | 1.48 |
| NM_002960 | S100A3    | 1.49 | NM_005521 | TLX1         | 1.49 |
| NM_006088 | TUBB2     | 1.49 | NM_003217 | TEGT         | 1.49 |
| NM_020166 | MCCC1     | 1.49 | NM_024079 | ALG8         | 1.49 |
| NM_003495 | HIST1H4I  | 1.49 | NM_004868 | GPSN2        | 1.49 |
| NM_021148 | ZNF273    | 1.49 | NM_024734 | CLMN         | 1.49 |
| NM_024868 | FLJ14124  | 1.49 | NM_030642 | APOL5        | 1.49 |
| NM_145647 | MGC21654  | 1.49 | NM_194291 | LOC157378    | 1.49 |

|           |           |      |              |           |      |
|-----------|-----------|------|--------------|-----------|------|
| NM_182542 | FLJ32682  | 1.49 | XM_209597    | LOC285407 | 1.49 |
| XM_371384 | LOC388776 | 1.49 | XM_373490    | LOC387754 | 1.49 |
| XM_375590 | LOC400682 | 1.49 | NM_001004195 | OR4F4     | 1.49 |
| NM_005158 | ABL2      | 1.5  | NM_002645    | PIK3C2A   | 1.5  |
| NM_005958 | MTNR1A    | 1.5  | NM_003278    | TNA       | 1.5  |
| NM_002144 | HOXB1     | 1.5  | NM_014754    | PTDSS1    | 1.5  |
| NM_004215 | EBAG9     | 1.5  | NM_004685    | MTMR6     | 1.5  |
| NM_017617 | NOTCH1    | 1.5  | NM_001152    | SLC25A5   | 1.5  |
| NM_014636 | RALGPS1A  | 1.5  | NM_002492    | NDUFB5    | 1.5  |
| NM_021079 | NMT1      | 1.5  | NM_022496    | ACTR6     | 1.5  |
| NM_001056 | SULT1C1   | 1.5  | XM_041162    | NDFIP2    | 1.5  |
| NM_018233 | FLJ10826  | 1.5  | NM_019607    | FLJ11267  | 1.5  |
| NM_022071 | SH2D4A    | 1.5  | NM_030781    | COLEC12   | 1.5  |
| XM_371257 | KIAA1799  | 1.5  | NM_032843    | FIBCD1    | 1.5  |
| XM_058681 | C14ORF66  | 1.5  | XM_291111    | GPR125    | 1.5  |
| NM_173524 | C10ORF64  | 1.5  | NM_176823    | S100A15   | 1.5  |
| XM_064265 | LOC124685 | 1.5  | XM_294567    | LOC347252 | 1.5  |
| XM_373574 | LOC387943 | 1.5  | NM_012407    | PRKCABP   | 1.51 |
| NM_017672 | TRPM7     | 1.51 | NM_006644    | HSPH1     | 1.51 |
| NM_004540 | NCAM2     | 1.51 | NM_001972    | ELA2      | 1.51 |
| NM_003290 | TPM4      | 1.51 | NM_020445    | ARP3BETA  | 1.51 |
| NM_001332 | CTNND2    | 1.51 | NM_001161    | NUDT2     | 1.51 |
| NM_001878 | CRABP2    | 1.51 | NM_003769    | SFRS9     | 1.51 |
| NM_006468 | POLR3C    | 1.51 | NM_020394    | SBZF3     | 1.51 |
| XM_374927 | KIAA1377  | 1.51 | NM_025063    | FLJ23550  | 1.51 |
| NM_032231 | FLJ22875  | 1.51 | NM_153811    | SLC38A6   | 1.51 |
| NM_152624 | DCP2      | 1.51 | NM_203381    | MGC71805  | 1.51 |
| XM_212061 | LOC285872 | 1.51 | XM_376725    | LOC401433 | 1.51 |
| NM_212550 | BLOC1S3   | 1.51 | NM_033214    | GK2       | 1.52 |
| NM_003667 | GPR49     | 1.52 | NM_005523    | HOXA11    | 1.52 |
| NM_012238 | SIRT1     | 1.52 | NM_000759    | CSF3      | 1.52 |
| NM_016639 | TNFRSF12A | 1.52 | NM_006818    | AF1Q      | 1.52 |
| NM_005668 | SIAT8D    | 1.52 | NM_014847    | NICE-4    | 1.52 |
| XM_375851 | KIAA0133  | 1.52 | NM_006604    | RFPL3     | 1.52 |
| XM_032945 | C21ORF25  | 1.52 | NM_017774    | CDKAL1    | 1.52 |
| XM_031744 | STARD9    | 1.52 | NM_032321    | MGC13057  | 1.52 |
| NM_152683 | FLJ33167  | 1.52 | NM_145304    | C7ORF33   | 1.52 |
| XM_167044 | SLC35F1   | 1.52 | NM_153265    | FLJ35827  | 1.52 |
| XM_374035 | LOC389100 | 1.52 | XM_379975    | LOC402625 | 1.52 |
| XM_378329 | LOC399983 | 1.52 | XM_373567    | LOC387932 | 1.52 |
| NM_212558 | LOC401498 | 1.52 | NM_001932    | MPP3      | 1.53 |
| NM_000118 | ENG       | 1.53 | NM_000917    | P4HA1     | 1.53 |
| NM_002393 | MDM4      | 1.53 | NM_002122    | HLA-DQA1  | 1.53 |
| NM_018725 | IL17RB    | 1.53 | NM_002266    | KPNA2     | 1.53 |
| NM_002077 | GOLGA1    | 1.53 | NM_006893    | LGTN      | 1.53 |
| NM_080282 | ABCA10    | 1.53 | NM_024722    | ACBD4     | 1.53 |

|              |           |      |           |            |      |
|--------------|-----------|------|-----------|------------|------|
| NM_014670    | BZW1      | 1.53 | NM_016255 | FAM8A1     | 1.53 |
| NM_016482    | C9ORF78   | 1.53 | NM_018011 | FLJ10154   | 1.53 |
| NM_018303    | SEC5L1    | 1.53 | NM_020932 | KIAA1587   | 1.53 |
| NM_032230    | FLJ22789  | 1.53 | NM_139168 | SFRS12     | 1.53 |
| NM_152901    | PYC1      | 1.53 | XM_370946 | LOC388226  | 1.53 |
| XM_060943    | LOC128322 | 1.53 | NM_002036 | FY         | 1.54 |
| NM_000535    | PMS2      | 1.54 | NM_020992 | PDLIM1     | 1.54 |
| NM_002495    | NDUFS4    | 1.54 | NM_000741 | CHRM4      | 1.54 |
| NM_000585    | IL15      | 1.54 | NM_000256 | MYBPC3     | 1.54 |
| NM_005208    | CRYBA1    | 1.54 | NM_001960 | EEF1D      | 1.54 |
| NM_017829    | CECR5     | 1.54 | NM_016564 | BM88       | 1.54 |
| NM_020406    | PRV1      | 1.54 | NM_022477 | NDRG3      | 1.54 |
| NM_032602    | CX62      | 1.54 | NM_032497 | ZNF559     | 1.54 |
| NM_198448    | UNQ429    | 1.54 | NM_173541 | C10ORF91   | 1.54 |
| NM_199047    | TBPL2     | 1.54 | XM_379741 | LOC401701  | 1.54 |
| XM_379716    | LOC401599 | 1.54 | NM_013941 | OR10C1     | 1.54 |
| NM_152327    | AK7       | 1.55 | NM_006915 | RP2        | 1.55 |
| NM_004310    | RHOH      | 1.55 | NM_001534 | TLX2       | 1.55 |
| NM_006741    | PPP1R1A   | 1.55 | NM_005434 | BENE       | 1.55 |
| NM_000882    | IL12A     | 1.55 | NM_006544 | SEC10L1    | 1.55 |
| NM_001195    | BFSP1     | 1.55 | NM_001542 | IGSF3      | 1.55 |
| NM_003796    | C19ORF2   | 1.55 | NM_016611 | KCNK4      | 1.55 |
| NM_017548    | H41       | 1.55 | NM_020189 | E(Y)2      | 1.55 |
| NM_152377    | MGC34837  | 1.55 | NM_198152 | URP        | 1.55 |
| XM_378178    | MGC9913   | 1.55 | XM_093087 | LOC170067  | 1.55 |
| NM_001005499 | OR6C70    | 1.55 | NM_012093 | AK5        | 1.56 |
| NM_002753    | MAPK10    | 1.56 | NM_005087 | FXR1       | 1.56 |
| NM_000344    | SMN1      | 1.56 | NM_000572 | IL10       | 1.56 |
| NM_018244    | C20ORF44  | 1.56 | NM_006017 | PROM1      | 1.56 |
| NM_005444    | RQCD1     | 1.56 | NM_007032 | HRIHFB2122 | 1.56 |
| NM_007049    | BTN2A1    | 1.56 | NM_018835 | MNAB       | 1.56 |
| NM_031275    | TEX12     | 1.56 | NM_024680 | FLJ23311   | 1.56 |
| NM_198148    | CPXM2     | 1.56 | NM_152792 | FLJ25084   | 1.56 |
| XM_371138    | LOC284390 | 1.56 | XM_373931 | LOC388823  | 1.56 |
| XM_372908    | LOC391340 | 1.56 | NM_014002 | IKBKE      | 1.57 |
| NM_001943    | DSG2      | 1.57 | NM_004820 | CYP7B1     | 1.57 |
| NM_005588    | MEP1A     | 1.57 | NM_003347 | UBE2L3     | 1.57 |
| NM_007315    | STAT1     | 1.57 | NM_004070 | CLCNKA     | 1.57 |
| NM_004937    | CTNS      | 1.57 | NR_001562 | ANXA2P1    | 1.57 |
| XM_290821    | EGFL4     | 1.57 | NM_013338 | ALG5       | 1.57 |
| NM_012327    | PIGN      | 1.57 | NM_019036 | HMGCLL1    | 1.57 |
| NM_020156    | C1GALT1   | 1.57 | NM_020845 | PITPNM2    | 1.57 |
| NM_020779    | WDR35     | 1.57 | NM_024738 | FLJ21415   | 1.57 |
| XM_378549    | LOC91948  | 1.57 | NM_144589 | COMTD1     | 1.57 |
| NM_152546    | FLJ25286  | 1.57 | XM_371190 | LOC162967  | 1.57 |
| NM_213603    | LOC285989 | 1.57 | XM_376207 | LOC401054  | 1.57 |

|           |           |      |           |           |      |
|-----------|-----------|------|-----------|-----------|------|
| XM_375603 | LOC400688 | 1.57 | XM_371140 | LOC388507 | 1.57 |
| NM_014326 | DAPK2     | 1.58 | NM_033450 | ABCC10    | 1.58 |
| NM_020948 | MI-ER1    | 1.58 | NM_002703 | PPAT      | 1.58 |
| NM_000502 | EPX       | 1.58 | BC007782  | IGLJ3     | 1.58 |
| NM_001096 | ACLY      | 1.58 | NM_014668 | GREB1     | 1.58 |
| NM_014411 | NSG-X     | 1.58 | NM_030594 | CPEB1     | 1.58 |
| NM_032683 | MGC12972  | 1.58 | NM_152407 | GRPEL2    | 1.58 |
| XM_114618 | LOC203069 | 1.58 | NM_178828 | C9ORF79   | 1.58 |
| NM_198284 | LOC349114 | 1.58 | XM_171150 | LOC254027 | 1.58 |
| NM_023038 | ADAM19    | 1.59 | NM_016487 | C6ORF203  | 1.59 |
| NM_017621 | FLJ20013  | 1.59 | NM_182503 | DEADC1    | 1.59 |
| NM_178463 | C20ORF166 | 1.59 | NM_153183 | NUDT10    | 1.59 |
| NM_152611 | C20ORF75  | 1.59 | NM_152997 | C4ORF7    | 1.59 |
| NM_002090 | CXCL3     | 1.6  | NM_018654 | GPRC5D    | 1.6  |
| NM_005487 | HMG2L1    | 1.6  | NM_002572 | PAFAH1B2  | 1.6  |
| NM_001230 | CASP10    | 1.6  | NM_012173 | FBXO25    | 1.6  |
| NM_000079 | CHRNA1    | 1.6  | NM_002274 | KRT13     | 1.6  |
| NM_004887 | CXCL14    | 1.6  | NM_017411 | SMN2      | 1.6  |
| NM_014421 | DKK2      | 1.6  | NM_018641 | CHST12    | 1.6  |
| XM_166132 | KIAA1462  | 1.6  | NM_022830 | RBM21     | 1.6  |
| NM_052936 | APG4A     | 1.6  | NM_174905 | LOC147965 | 1.6  |
| XM_092778 | LOC164395 | 1.6  | XM_379586 | LOC286186 | 1.6  |
| XM_210042 | LOC286423 | 1.6  | XM_372376 | LOC390113 | 1.6  |
| XM_375631 | LOC400707 | 1.6  | XM_378970 | LOC400839 | 1.6  |
| NM_006035 | CDC42BPB  | 1.61 | NM_003507 | FZD7      | 1.61 |
| NM_005194 | CEBPB     | 1.61 | XM_039762 | MYT1L     | 1.61 |
| NM_005263 | GFI1      | 1.61 | NM_002397 | MEF2C     | 1.61 |
| NM_000022 | ADA       | 1.61 | NM_003425 | ZNF45     | 1.61 |
| NM_003205 | TCF12     | 1.61 | NM_002133 | HMOX1     | 1.61 |
| NM_003339 | UBE2D2    | 1.61 | NM_021642 | FCGR2A    | 1.61 |
| NM_020384 | CLDN2     | 1.61 | NM_001393 | ECM2      | 1.61 |
| NM_012430 | SEC22L2   | 1.61 | NM_014358 | CLECSF9   | 1.61 |
| NM_031896 | CACNG7    | 1.61 | NM_024698 | SLC25A22  | 1.61 |
| NM_138959 | VANGL1    | 1.61 | NM_032494 | ZC3HDC8   | 1.61 |
| NM_033421 | C20ORF161 | 1.61 | NM_019016 | KRT24     | 1.61 |
| XM_376309 | LOC285540 | 1.61 | XM_291269 | KIAA1875  | 1.61 |
| NM_006712 | FASTK     | 1.62 | NM_002587 | PCDH1     | 1.62 |
| NM_015149 | RGL1      | 1.62 | NM_004467 | FGL1      | 1.62 |
| NM_003374 | VDAC1     | 1.62 | XM_042635 | KIAA1069  | 1.62 |
| NM_016055 | MRPL48    | 1.62 | NM_025130 | FLJ22761  | 1.62 |
| NM_024903 | FLJ14297  | 1.62 | NM_019014 | POLR1B    | 1.62 |
| NM_054029 | C8ORF14   | 1.62 | NM_173700 | FLJ39821  | 1.62 |
| NM_001364 | DLG2      | 1.63 | NM_003319 | TTN       | 1.63 |
| NM_004646 | NPHS1     | 1.63 | NM_000603 | NOS3      | 1.63 |
| NM_006600 | NUDC      | 1.63 | NM_022658 | HOXC8     | 1.63 |
| NM_005834 | TIMM17B   | 1.63 | NM_006451 | PAIP1     | 1.63 |

|              |           |      |           |           |      |
|--------------|-----------|------|-----------|-----------|------|
| NM_016360    | LOC51204  | 1.63 | NM_194294 | LOC169355 | 1.63 |
| XM_097622    | LOC149297 | 1.63 | XM_089281 | LOC149281 | 1.63 |
| XM_068632    | LOC133993 | 1.63 | XM_374079 | LOC389204 | 1.63 |
| XM_375165    | LOC390535 | 1.63 | XM_374227 | LOC389534 | 1.63 |
| NM_175620    | MTM       | 1.63 | NM_001291 | CLK2      | 1.64 |
| NM_004473    | FOXE1     | 1.64 | NM_003222 | TFAP2C    | 1.64 |
| NM_006847    | LILRB4    | 1.64 | NM_020462 | KIAA1181  | 1.64 |
| NM_001340    | CYLC2     | 1.64 | NM_005035 | POLRMT    | 1.64 |
| NM_003904    | ZNF259    | 1.64 | NM_015853 | LOC51035  | 1.64 |
| NM_016483    | PHF7      | 1.64 | NM_153646 | SLC24A4   | 1.64 |
| NM_152425    | FLJ40249  | 1.64 | NM_173639 | FLJ35976  | 1.64 |
| XM_209656    | LOC285550 | 1.64 | XM_379495 | LOC401358 | 1.64 |
| NM_001006120 | RBMY1D    | 1.64 | NM_000459 | TEK       | 1.65 |
| NM_000406    | GNRHR     | 1.65 | NM_000333 | SCA7      | 1.65 |
| NM_003602    | FKBP6     | 1.65 | NM_006113 | VAV3      | 1.65 |
| NM_030775    | WNT5B     | 1.65 | NM_021008 | DEAF1     | 1.65 |
| NM_172341    | PEN2      | 1.65 | NM_152374 | FLJ38984  | 1.65 |
| XM_371722    | LOC389257 | 1.65 | XM_376861 | LOC401520 | 1.65 |
| NM_033126    | PSKH2     | 1.66 | NM_013296 | GPSM2     | 1.66 |
| NM_000921    | PDE3A     | 1.66 | NM_004241 | JMJD1C    | 1.66 |
| NM_006365    | CROC4     | 1.66 | NM_004993 | MJD       | 1.66 |
| NM_006801    | KDELR1    | 1.66 | NM_024114 | TRIM48    | 1.66 |
| NM_032847    | FLJ14825  | 1.66 | NM_152334 | FLJ25005  | 1.66 |
| XM_371285    | LOC128102 | 1.66 | NM_139165 | RAET1E    | 1.66 |
| NM_153341    | IBRDC3    | 1.66 | XM_378786 | LOC148145 | 1.66 |
| XM_088691    | DGAT2L3   | 1.66 | XM_378983 | LOC284749 | 1.66 |
| NM_030630    | C17ORF28  | 1.66 | NM_183379 | TESSP1    | 1.66 |
| XM_172389    | LOC256085 | 1.66 | XM_374973 | LOC400025 | 1.66 |
| NM_006193    | PAX4      | 1.67 | NM_005649 | ZNF354A   | 1.67 |
| NM_006244    | PPP2R5B   | 1.67 | NM_002415 | MIF       | 1.67 |
| NM_014766    | SCRN1     | 1.67 | NM_020728 | KIAA1228  | 1.67 |
| NM_023080    | FLJ20989  | 1.67 | NM_024839 | RPP21     | 1.67 |
| NM_138781    | LOC113386 | 1.67 | NM_053049 | UCN3      | 1.67 |
| NM_173675    | FLJ33708  | 1.67 | NM_173831 | LOC286075 | 1.67 |
| NM_198282    | LOC340061 | 1.67 | XM_170708 | LOC255411 | 1.67 |
| XM_210908    | LOC283157 | 1.67 | XM_379262 | LOC401124 | 1.67 |
| NM_002843    | PTPRJ     | 1.68 | NM_000955 | PTGER1    | 1.68 |
| NM_002550    | OR3A1     | 1.68 | NM_005319 | HIST1H1C  | 1.68 |
| NM_001563    | IMPG1     | 1.68 | NM_000304 | PMP22     | 1.68 |
| NM_004337    | C8ORF1    | 1.68 | NM_181532 | ERAS      | 1.68 |
| NM_032264    | AE2       | 1.68 | NM_003540 | HIST1H4F  | 1.68 |
| NM_016644    | LOC51334  | 1.68 | NM_019056 | P17.3     | 1.68 |
| NM_138283    | CSTL1     | 1.68 | NM_173599 | FLJ40126  | 1.68 |
| XM_379476    | LOC401312 | 1.68 | XM_376472 | LOC401239 | 1.68 |
| NM_032427    | MAML2     | 1.69 | NM_002545 | OPCML     | 1.69 |
| NM_014362    | HIBCH     | 1.69 | NM_005101 | G1P2      | 1.69 |

|           |           |      |              |              |      |
|-----------|-----------|------|--------------|--------------|------|
| NM_002344 | LTK       | 1.7  | NM_006500    | MCAM         | 1.7  |
| NM_005989 | AKR1D1    | 1.7  | NM_003182    | TAC1         | 1.7  |
| NM_003243 | TGFBR3    | 1.7  | NM_173708    | MTND1        | 1.7  |
| NM_003056 | SLC19A1   | 1.7  | NM_018185    | C13ORF17     | 1.7  |
| NM_024926 | FLJ12571  | 1.7  | NM_181704    | BAGE4        | 1.7  |
| NM_145755 | STI2      | 1.7  | NM_199136    | MGC72075     | 1.7  |
| XM_375067 | LOC400197 | 1.7  | XM_372420    | LOC390217    | 1.7  |
| NM_002597 | PDC       | 1.71 | NM_001773    | CD34         | 1.71 |
| NM_014977 | ACIN1     | 1.71 | NM_178568    | RTN4RL1      | 1.71 |
| NM_020041 | SLC2A9    | 1.71 | NM_007373    | SHOC2        | 1.71 |
| NM_024553 | FLJ20097  | 1.71 | NM_022663    | CTAGE1       | 1.71 |
| NM_173670 | RGMB      | 1.71 | NM_203395    | DEHAL1       | 1.71 |
| XM_371302 | LOC388686 | 1.71 | NM_031219    | C9ORF158     | 1.72 |
| NM_002647 | PIK3C3    | 1.72 | NM_003172    | SURF1        | 1.72 |
| NM_194449 | PLEKHE1   | 1.72 | NM_031281    | IRTA2        | 1.72 |
| NM_002365 | MAGEB3    | 1.72 | NM_005741    | ZNF263       | 1.72 |
| NM_015485 | RWDD3     | 1.72 | NM_016350    | NIN          | 1.72 |
| NM_032305 | MGC3200   | 1.72 | NM_138769    | RHOT2        | 1.72 |
| NM_138570 | MGC15523  | 1.72 | XM_085578    | FLJ46675     | 1.72 |
| XM_290714 | RAB43     | 1.72 | XM_374255    | LOC389637    | 1.72 |
| XM_379002 | LOC400861 | 1.72 | NM_001005514 | OR5H14       | 1.72 |
| NM_007043 | HRB2      | 1.73 | NM_003285    | TNR          | 1.73 |
| NM_014263 | YME1L1    | 1.73 | BC038293     | PTENP1       | 1.73 |
| NM_016087 | WNT16     | 1.73 | NM_004085    | TIMM8A       | 1.73 |
| NM_019845 | REPRIMO   | 1.73 | NM_014938    | MONDOA       | 1.73 |
| NM_018031 | WDR6      | 1.73 | NM_001185    | AZGP1        | 1.73 |
| NM_004640 | BAT1      | 1.73 | NM_005885    | 38777        | 1.73 |
| NM_005799 | INADL     | 1.73 | NM_016107    | ZFR          | 1.73 |
| NM_021255 | PELI2     | 1.73 | XM_047325    | THOC2        | 1.73 |
| NM_024031 | MGC3121   | 1.73 | NM_032263    | DKFZP434B227 | 1.73 |
| NM_138341 | LOC89894  | 1.73 | NM_152262    | ZNF439       | 1.73 |
| XM_374781 | LOC220906 | 1.73 | XM_373549    | LOC387887    | 1.73 |
| XM_370975 | LOC388259 | 1.73 | NM_001347    | DGKQ         | 1.74 |
| NM_004350 | RUNX3     | 1.74 | NM_000528    | MAN2B1       | 1.74 |
| NM_016011 | CGI-63    | 1.74 | NM_001953    | ECGF1        | 1.74 |
| NM_005874 | LILRB2    | 1.74 | NM_006238    | PPARD        | 1.74 |
| NM_144699 | ATP1A4    | 1.74 | NM_004089    | DSIPI        | 1.74 |
| NM_030661 | HOXA3     | 1.74 | NM_005969    | NAP1L4       | 1.74 |
| NM_005651 | TDO2      | 1.74 | NM_015035    | ZHX3         | 1.74 |
| NM_016074 | CGI-143   | 1.74 | NM_015964    | CGI-38       | 1.74 |
| NM_016289 | MO25      | 1.74 | NM_016551    | TM7SF3       | 1.74 |
| NM_030572 | MGC10946  | 1.74 | XM_210184    | LOC283117    | 1.74 |
| XM_379639 | LOC401522 | 1.74 | NM_004936    | CDKN2B       | 1.75 |
| NM_005226 | EDG3      | 1.75 | NM_003662    | PIR          | 1.75 |
| NM_014491 | FOXP2     | 1.75 | NM_000314    | PTEN         | 1.75 |
| NM_006705 | GADD45G   | 1.75 | NM_021244    | RRAGD        | 1.75 |

|           |           |      |           |            |      |
|-----------|-----------|------|-----------|------------|------|
| NM_012466 | TM4-B     | 1.75 | NM_152453 | MGC35118   | 1.75 |
| XM_379179 | LOC152274 | 1.75 | NM_174911 | NSE2       | 1.75 |
| NM_181716 | P30       | 1.75 | NM_182576 | MGC39821   | 1.75 |
| XM_290671 | LOC339047 | 1.75 | NM_207396 | FLJ46380   | 1.75 |
| XM_372824 | LOC391192 | 1.75 | XM_373098 | LOC391844  | 1.75 |
| XM_374137 | LOC389328 | 1.75 | XM_377514 | LOC401898  | 1.75 |
| NM_153361 | MGC42105  | 1.76 | NM_014063 | HIP-55     | 1.76 |
| NM_003864 | SAP30     | 1.76 | NM_001090 | ABCF1      | 1.76 |
| NM_001128 | AP1G1     | 1.76 | NM_004407 | DMP1       | 1.76 |
| NM_013444 | UBQLN2    | 1.76 | NM_032804 | C10ORF22   | 1.76 |
| XM_059318 | RUTBC2    | 1.76 | XM_290755 | FLJ35848   | 1.76 |
| XM_379231 | LOC401098 | 1.76 | XM_372500 | LOC390429  | 1.76 |
| XM_375224 | LOC400410 | 1.76 | XM_372638 | LOC390729  | 1.76 |
| NM_002031 | FRK       | 1.77 | NM_013247 | PRSS25     | 1.77 |
| NM_006984 | CLDN10    | 1.77 | NM_004552 | NDUFS5     | 1.77 |
| NM_015670 | SENP3     | 1.77 | NM_024729 | MYH14      | 1.77 |
| NM_152769 | C19ORF26  | 1.77 | XM_376206 | LOC285375  | 1.77 |
| NM_018843 | MCFP      | 1.77 | XM_371842 | LOC389421  | 1.77 |
| NM_004780 | TCEAL1    | 1.78 | NM_012212 | LTB4DH     | 1.78 |
| NM_002187 | IL12B     | 1.78 | NM_016150 | ASB2       | 1.78 |
| AF126749  | KLHL1AS   | 1.78 | NM_017657 | AFTIPHILIN | 1.78 |
| NM_004756 | NUMBL     | 1.78 | NM_003773 | HYAL2      | 1.78 |
| NM_182831 | TNT       | 1.78 | NM_175901 | LOC283932  | 1.78 |
| XM_370657 | C11ORF34  | 1.78 | XM_374134 | LOC389319  | 1.78 |
| XM_373687 | LOC388278 | 1.78 | NM_006956 | ZNF12      | 1.78 |
| NM_005159 | ACTC      | 1.79 | NM_002099 | GYPA       | 1.79 |
| NM_001372 | DNAH9     | 1.79 | NM_018950 | HLA-F      | 1.79 |
| NM_004722 | AP4M1     | 1.79 | NM_006656 | NEU3       | 1.79 |
| NM_014345 | ZNF318    | 1.79 | NM_024959 | SLC24A6    | 1.79 |
| NM_025161 | FLJ22175  | 1.79 | NM_031914 | SYT14L     | 1.79 |
| XM_096317 | C10ORF73  | 1.79 | XM_351193 | SYCN       | 1.79 |
| NM_194314 | FRBZ1     | 1.79 | XM_372122 | LOC389765  | 1.79 |
| XM_209429 | LOC284988 | 1.79 | XM_373734 | LOC388388  | 1.79 |
| NM_002141 | HOXA4     | 1.8  | NM_000550 | TYRP1      | 1.8  |
| NM_018315 | FBXW7     | 1.8  | NM_057178 | LOC117584  | 1.8  |
| NM_018941 | CLN8      | 1.8  | NM_005397 | PODXL      | 1.8  |
| NM_006995 | BTN2A2    | 1.8  | NM_006472 | TXNIP      | 1.8  |
| NM_012338 | TM4SF12   | 1.8  | NM_018420 | SLC22A15   | 1.8  |
| XM_378189 | MGC15705  | 1.8  | XM_373594 | LOC387992  | 1.8  |
| XM_370560 | LOC387684 | 1.8  | XM_373958 | LOC388898  | 1.8  |
| NM_000914 | OPRM1     | 1.81 | NM_002833 | PTPN9      | 1.81 |
| NM_005629 | SLC6A8    | 1.81 | NM_000276 | OCRL       | 1.81 |
| NM_013398 | ZNF224    | 1.81 | NM_006630 | ZNF234     | 1.81 |
| NM_012069 | ATP1B4    | 1.81 | NM_018268 | FLJ10904   | 1.81 |
| NM_024490 | ATP10A    | 1.81 | NM_022789 | IL17E      | 1.81 |
| NM_032850 | ZFYVE19   | 1.81 | NM_033229 | TRIM15     | 1.81 |

|           |               |      |           |           |      |
|-----------|---------------|------|-----------|-----------|------|
| NM_138458 | LOC116143     | 1.81 | NM_138393 | C19ORF32  | 1.81 |
| XM_208908 | LOC283922     | 1.81 | NM_173830 | C6ORF182  | 1.81 |
| NM_173685 | FLJ32440      | 1.81 | NM_003737 | PCDH16    | 1.82 |
| NM_007044 | KATNA1        | 1.82 | NM_016208 | VPS28     | 1.82 |
| NM_018261 | SEC3L1        | 1.82 | NM_019891 | ERO1LB    | 1.82 |
| NM_024039 | MIS12         | 1.82 | NM_199044 | MGC22960  | 1.82 |
| NM_002240 | KCNJ6         | 1.83 | NM_016279 | CDH9      | 1.83 |
| NM_001806 | CEBPG         | 1.83 | NM_000636 | SOD2      | 1.83 |
| NM_004465 | FGF10         | 1.83 | NM_000149 | FUT3      | 1.83 |
| NM_173704 | MTCO1         | 1.83 | NM_014696 | KIAA0514  | 1.83 |
| NM_012381 | ORC3L         | 1.83 | NM_016145 | PTD008    | 1.83 |
| NM_018977 | NLGN3         | 1.83 | NM_018317 | FLJ11082  | 1.83 |
| NM_032143 | DKFZP434B1727 | 1.83 | NM_145260 | ODD       | 1.83 |
| XM_376728 | LOC155435     | 1.83 | NM_000909 | NPY1R     | 1.84 |
| NM_005938 | MLLT7         | 1.84 | NM_004235 | KLF4      | 1.84 |
| NM_000055 | BCHE          | 1.84 | NM_021080 | DAB1      | 1.84 |
| NM_018669 | WDR4          | 1.84 | NM_002279 | KRTHA3B   | 1.84 |
| NM_005676 | RBM10         | 1.84 | NM_025010 | KIAA0795  | 1.84 |
| NM_032706 | MGC12966      | 1.84 | NM_207365 | MGC72001  | 1.84 |
| XM_292085 | LOC341457     | 1.84 | NM_020524 | PBXIP1    | 1.85 |
| NM_000049 | ASPA          | 1.85 | NM_005363 | MAGEA6    | 1.85 |
| NM_005095 | ZNF262        | 1.85 | NM_006103 | WFDC2     | 1.85 |
| NM_021637 | FLJ14084      | 1.85 | NM_031458 | BAL       | 1.85 |
| NM_138394 | LOC92906      | 1.85 | XM_379498 | LOC401363 | 1.85 |
| XM_375589 | LOC400681     | 1.85 | NM_003687 | PDLIM4    | 1.86 |
| NM_003660 | PPFIA3        | 1.86 | NM_000851 | GSTM5     | 1.86 |
| NM_033554 | HLA-DPA1      | 1.86 | NM_015483 | KBTBD2    | 1.86 |
| NM_015702 | C2ORF25       | 1.86 | NM_016510 | SCLY      | 1.86 |
| XM_371399 | C20ORF142     | 1.86 | NM_152637 | MGC17301  | 1.86 |
| NM_178822 | IGSF10        | 1.86 | NM_001669 | ARSD      | 1.86 |
| NM_003576 | STK24         | 1.87 | NM_178471 | GPR119    | 1.87 |
| NM_018450 | ARID1A        | 1.87 | NM_002108 | HAL       | 1.87 |
| NM_001861 | COX4I1        | 1.87 | NM_018358 | ABCF3     | 1.87 |
| NM_006694 | JTB           | 1.87 | NM_020195 | C14ORF124 | 1.87 |
| XM_064190 | FLJ40311      | 1.87 | NM_172070 | ZNF650    | 1.87 |
| NM_178820 | FBXO27        | 1.87 | NM_175876 | EXOC8     | 1.87 |
| NM_153486 | LDHD          | 1.87 | XM_373691 | LOC388283 | 1.87 |
| NM_000549 | TSHB          | 1.88 | NM_001491 | GCNT2     | 1.88 |
| NM_020726 | NLN           | 1.88 | NM_000036 | AMPD1     | 1.88 |
| NM_000409 | GUCA1A        | 1.88 | NM_012318 | LETM1     | 1.88 |
| NM_144640 | IL17RE        | 1.88 | XM_372159 | LOC389813 | 1.88 |
| NM_015978 | TNNI3K        | 1.89 | NM_004087 | DLG1      | 1.89 |
| NM_003431 | ZNF124        | 1.89 | NM_002584 | PAX7      | 1.89 |
| NM_004918 | TCL1B         | 1.89 | NM_000751 | CHRND     | 1.89 |
| NM_022731 | NUCKS         | 1.89 | NM_003038 | SLC1A4    | 1.89 |
| NM_016474 | LOC51244      | 1.89 | NM_017747 | ANKHD1    | 1.89 |



|           |           |      |           |               |      |
|-----------|-----------|------|-----------|---------------|------|
| NM_022770 | FLJ13912  | 1.89 | XM_171094 | LOC253314     | 1.89 |
| XM_373541 | LOC387873 | 1.89 | NM_214711 | LOC401137     | 1.89 |
| NM_002154 | HSPA4     | 1.9  | NM_014488 | RAB30         | 1.9  |
| NM_032147 | USP44     | 1.9  | NM_004355 | CD74          | 1.9  |
| NM_013248 | NXT1      | 1.9  | NM_024083 | ASPSCR1       | 1.9  |
| NM_004374 | COX6C     | 1.9  | NM_018056 | FLJ10315      | 1.9  |
| NM_025182 | KIAA1539  | 1.9  | XM_371174 | ZNF283        | 1.9  |
| XM_370541 | FLJ44037  | 1.9  | NM_001059 | TACR3         | 1.91 |
| NM_003350 | UBE2V2    | 1.91 | NM_032288 | DKFZP761B1514 | 1.91 |
| NM_058192 | C16ORF40  | 1.91 | XM_376148 | LOC401015     | 1.91 |
| NM_005327 | HADHSC    | 1.92 | NM_020919 | ALS2          | 1.92 |
| NM_001223 | CASP1     | 1.92 | NM_014438 | IL1F8         | 1.92 |
| XM_051264 | TXNRD3    | 1.92 | XM_048825 | KIAA1026      | 1.92 |
| NM_002298 | LCP1      | 1.92 | NM_003635 | NDST2         | 1.92 |
| NM_020411 | GAGED2    | 1.92 | NM_016118 | NYREN18       | 1.92 |
| XM_378184 | KIAA1383  | 1.92 | NM_018281 | FLJ10948      | 1.92 |
| XM_045907 | FAM40B    | 1.92 | NM_023923 | PHACTR4       | 1.92 |
| NM_144568 | C14ORF9   | 1.92 | NM_178127 | ANGPTL5       | 1.92 |
| NM_207359 | LOC339896 | 1.92 | NM_199344 | LOC375035     | 1.92 |
| XM_293514 | LOC344620 | 1.92 | NM_213723 | C13ORF25      | 1.92 |
| NM_001248 | ENTPD3    | 1.93 | NM_021159 | RAP1GDS1      | 1.93 |
| NM_002837 | PTPRB     | 1.93 | NM_016579 | 8D6A          | 1.93 |
| NM_007058 | CAPN11    | 1.93 | NM_013372 | GREM1         | 1.93 |
| NM_017975 | FLJ10036  | 1.93 | NM_173510 | FLJ33814      | 1.93 |
| NM_002715 | PPP2CA    | 1.94 | NM_022825 | PORCN         | 1.94 |
| NM_020786 | PDP2      | 1.94 | NM_020673 | RAB22A        | 1.94 |
| NM_014477 | C20ORF10  | 1.94 | NM_015957 | MMRP19        | 1.94 |
| NM_017791 | C14ORF58  | 1.94 | NM_022471 | GMCL1L        | 1.94 |
| NM_024103 | SLC25A23  | 1.94 | NM_178517 | PIGW          | 1.94 |
| NM_203371 | LOC387758 | 1.94 | XM_211694 | LOC284931     | 1.94 |
| NM_014693 | ECE2      | 1.95 | NM_006873 | SBLF          | 1.95 |
| NM_052903 | TUBGCP5   | 1.95 | XM_377949 | LOC402282     | 1.95 |
| XM_375619 | LOC400705 | 1.95 | XM_371097 | LOC388444     | 1.95 |
| NM_002543 | OLR1      | 1.96 | NM_000749 | CHRN3         | 1.96 |
| NM_020546 | ADCY2     | 1.96 | NM_006539 | CACNG3        | 1.96 |
| XM_032996 | KIAA0819  | 1.96 | NM_019086 | FLJ20674      | 1.96 |
| NM_194252 | C9ORF20   | 1.96 | NM_152672 | OSTALPHA      | 1.96 |
| NM_172241 | CTAGE-2   | 1.96 | XM_372921 | LOC391358     | 1.96 |
| XM_376841 | LOC401509 | 1.96 | NM_153835 | GPR113        | 1.97 |
| NM_001667 | ARL2      | 1.97 | NM_006078 | CACNG2        | 1.97 |
| NM_017435 | SLCO1C1   | 1.97 | NM_021180 | SOM           | 1.97 |
| NM_152317 | DEPDC4    | 1.97 | NM_153362 | C6ORF158      | 1.97 |
| NM_139248 | LIPH      | 1.97 | XM_293802 | LOC345378     | 1.97 |
| XM_294456 | LOC346910 | 1.97 | NM_012280 | FTSJ1         | 1.98 |
| NM_002390 | ADAM11    | 1.98 | NM_173709 | MTND2         | 1.98 |
| XM_050478 | KIAA1202  | 1.98 | NM_024057 | NUP37         | 1.98 |

|              |               |      |              |           |      |
|--------------|---------------|------|--------------|-----------|------|
| NM_058188    | C21ORF67      | 1.98 | NM_145167    | PIGM      | 1.98 |
| NM_152311    | MGC32871      | 1.98 | NM_145046    | CALR3     | 1.98 |
| NM_080743    | SRRP35        | 1.98 | XM_294521    | FLJ43950  | 1.98 |
| NM_003159    | CDKL5         | 1.99 | NM_014423    | AF5Q31    | 1.99 |
| NM_001001349 | NKIRAS2       | 1.99 | NM_003430    | ZNF91     | 1.99 |
| NM_006306    | SMC1L1        | 1.99 | NM_003779    | B4GALT3   | 1.99 |
| NM_015065    | SLAC2-B       | 1.99 | XM_378372    | LOC256021 | 1.99 |
| XM_085347    | LOC146167     | 1.99 | NM_003845    | DYRK4     | 2    |
| NM_003926    | MBD3          | 2    | NM_005810    | KLRG1     | 2    |
| XM_376044    | STAF65(GAMMA) | 2    | NM_016598    | ZDHHC3    | 2    |
| NM_018269    | SIPL          | 2    | NM_006770    | MARCO     | 2.01 |
| NM_000376    | VDR           | 2.01 | NM_005415    | SLC20A1   | 2.01 |
| NM_016271    | RNF138        | 2.01 | NM_032131    | ARMC2     | 2.01 |
| XM_371195    | MGC35045      | 2.01 | XM_370982    | LOC388275 | 2.01 |
| NM_004375    | COX11         | 2.02 | NM_000628    | IL10RB    | 2.02 |
| NM_007351    | MMRN1         | 2.02 | NM_003615    | SLC4A7    | 2.02 |
| NM_054017    | C8ORF12       | 2.02 | NM_053001    | OSR2      | 2.02 |
| NM_004300    | ACP1          | 2.03 | NM_001399    | ED1       | 2.03 |
| NM_016146    | TRAPPC4       | 2.03 | XM_372747    | FLJ00060  | 2.03 |
| XM_070233    | LOC137107     | 2.03 | XM_370629    | LOC387775 | 2.03 |
| NM_001278    | CHUK          | 2.04 | NM_006886    | ATP5E     | 2.04 |
| NM_016139    | CHCHD2        | 2.04 | NM_018359    | FLJ11200  | 2.04 |
| NM_024894    | FLJ14075      | 2.04 | NM_144609    | FLJ31795  | 2.04 |
| NM_173683    | C8ORF21       | 2.04 | XM_379671    | LOC401553 | 2.04 |
| NM_001005243 | OR9K2         | 2.04 | NM_005766    | FARP1     | 2.05 |
| NM_003151    | STAT4         | 2.05 | NM_013449    | BAZ2A     | 2.05 |
| NM_173039    | AQP11         | 2.05 | NM_178171    | GSDM      | 2.05 |
| NM_001001731 | HHCM          | 2.05 | NM_007050    | PTPRT     | 2.06 |
| NM_005526    | HSF1          | 2.06 | NM_017659    | FLJ20084  | 2.06 |
| NM_032848    | FLJ14827      | 2.06 | NM_032881    | LSM10     | 2.06 |
| NM_033107    | LOC85865      | 2.06 | XM_059104    | LOC127003 | 2.06 |
| XM_373639    | LOC388144     | 2.06 | XM_377696    | LOC402036 | 2.06 |
| NM_024885    | TAF7L         | 2.07 | NM_000490    | AVP       | 2.07 |
| NM_002430    | MN1           | 2.07 | NM_006943    | SOX12     | 2.07 |
| NM_015926    | ZSIG11        | 2.07 | XM_379145    | LOC401020 | 2.07 |
| NM_004306    | ANXA13        | 2.08 | XM_371917    | LOC389517 | 2.08 |
| XM_371086    | LOC388432     | 2.08 | NM_001771    | CD22      | 2.09 |
| NM_006531    | TTC10         | 2.09 | NM_018297    | NGLY1     | 2.09 |
| NM_018443    | ZNF302        | 2.09 | NM_144688    | FLJ32658  | 2.09 |
| NM_213604    | THSD6         | 2.09 | XM_294249    | LOC340265 | 2.09 |
| XM_371948    | LOC389549     | 2.09 | NM_001005323 | OR5AK2    | 2.09 |
| NM_006560    | CUGBP1        | 2.1  | NM_002232    | KCNA3     | 2.1  |
| NM_016027    | LACTB2        | 2.1  | NM_018695    | ERBB2IP   | 2.1  |
| NM_024549    | FLJ21127      | 2.1  | NM_033317    | ZD52F10   | 2.1  |
| NM_205848    | SYT6          | 2.1  | NM_139016    | LOC128439 | 2.1  |
| XM_370848    | LOC388104     | 2.1  | XM_377034    | LOC401612 | 2.1  |

|              |              |      |              |           |      |
|--------------|--------------|------|--------------|-----------|------|
| NM_002405    | MFNG         | 2.11 | NM_007073    | BVES      | 2.11 |
| XM_058404    | PNLIPRP3     | 2.11 | NM_181806    | NRPS998   | 2.11 |
| XM_210787    | LOC284433    | 2.11 | XM_373082    | LOC391784 | 2.11 |
| XM_380159    | LOC402632    | 2.11 | XM_378436    | LOC400163 | 2.11 |
| NM_004554    | NFATC4       | 2.12 | NM_016437    | TUBG2     | 2.12 |
| NM_012285    | KCNH4        | 2.12 | NM_000445    | PLEC1     | 2.12 |
| NM_145012    | C10ORF9      | 2.12 | XM_375065    | ZNF409    | 2.12 |
| NM_032928    | MGC14141     | 2.12 | XM_209607    | LOC285429 | 2.12 |
| NM_000738    | CHRM1        | 2.14 | NM_000455    | STK11     | 2.14 |
| NM_002832    | PTPN7        | 2.14 | NM_002538    | OCLN      | 2.14 |
| XM_371717    | ODZ3         | 2.14 | NM_014399    | TM4SF13   | 2.14 |
| NM_001003799 | TARP         | 2.14 | XM_166453    | TTBK1     | 2.15 |
| NM_018036    | C14ORF103    | 2.15 | NM_033204    | ZNF101    | 2.15 |
| NM_198841    | C9ORF10OS    | 2.15 | NM_181788    | LOC341567 | 2.15 |
| XM_291028    | DKFZP434A128 | 2.15 | XM_065445    | LOC129870 | 2.15 |
| NM_018174    | BPY2IP1      | 2.16 | NM_030777    | SLC2A10   | 2.16 |
| NM_032193    | AYP1         | 2.16 | NM_144598    | MGC24976  | 2.16 |
| NM_007085    | FSTL1        | 2.17 | NM_003387    | WASPIP    | 2.17 |
| NM_003192    | TBCC         | 2.17 | XM_047707    | SLC39A10  | 2.17 |
| NM_052885    | SLC2A13      | 2.17 | NM_144715    | FLJ25200  | 2.17 |
| NM_153442    | GPR26        | 2.18 | NM_003143    | SSBP1     | 2.18 |
| NM_016505    | PS1D         | 2.18 | NM_152481    | FLJ25660  | 2.18 |
| NM_021784    | FOXA2        | 2.19 | AF113887     | IGKC      | 2.19 |
| NM_022062    | PKNOX2       | 2.19 | NM_004957    | FPGS      | 2.19 |
| NM_004945    | DNM2         | 2.19 | NM_017750    | FLJ20296  | 2.19 |
| NM_018342    | FLJ11155     | 2.19 | NM_175058    | LOC144100 | 2.19 |
| NM_001002029 | C4B          | 2.19 | NM_000831    | GRIK3     | 2.2  |
| NM_017721    | FLJ20241     | 2.2  | NM_018241    | FLJ10846  | 2.2  |
| XM_061871    | FAT3         | 2.2  | NM_173553    | FLJ25801  | 2.2  |
| XM_290722    | LOC339123    | 2.2  | XM_372046    | LOC389667 | 2.2  |
| XM_376965    | LOC401570    | 2.2  | XM_374490    | LOC392748 | 2.2  |
| NM_018339    | RFK          | 2.21 | NM_012415    | RAD54B    | 2.21 |
| NM_012087    | GTF3C5       | 2.21 | NM_017643    | MBTD1     | 2.21 |
| NM_080751    | TMC2         | 2.21 | NM_178832    | C10ORF83  | 2.21 |
| XM_291120    | SLC6A19      | 2.21 | NM_133646    | ZAK       | 2.22 |
| NM_003386    | ZAN          | 2.22 | NM_002844    | PTPRK     | 2.22 |
| NM_006517    | SLC16A2      | 2.22 | NM_007041    | ATE1      | 2.22 |
| NM_020552    | TCL6         | 2.22 | XM_375809    | LOC126669 | 2.22 |
| XM_376899    | LOC401546    | 2.22 | NM_001005484 | OR4F5     | 2.22 |
| NM_000895    | LTA4H        | 2.23 | NM_016627    | LOC51321  | 2.23 |
| NM_032687    | MGC13010     | 2.23 | NM_144574    | WDR20     | 2.23 |
| XM_379025    | LOC400877    | 2.23 | NM_002115    | HK3       | 2.24 |
| NM_000761    | CYP1A2       | 2.24 | NM_007125    | UTY       | 2.24 |
| NM_006603    | STAG2        | 2.24 | NM_015938    | CGI-07    | 2.24 |
| NM_030919    | C20ORF129    | 2.24 | NM_199345    | LOC375133 | 2.24 |
| NM_014562    | OTX1         | 2.25 | NM_139055    | ADAMTS15  | 2.25 |

|           |              |      |           |               |      |
|-----------|--------------|------|-----------|---------------|------|
| NM_013341 | PTD004       | 2.25 | XM_375456 | DKFZP761G2113 | 2.25 |
| NM_024941 | FLJ13611     | 2.25 | XM_292504 | LOC342357     | 2.25 |
| NM_005111 | CRYZL1       | 2.26 | XM_376905 | EGFL5         | 2.26 |
| NM_032274 | DKFZP547F072 | 2.26 | XM_378787 | LOC284395     | 2.26 |
| NM_012188 | FOXI1        | 2.27 | NM_015002 | FBXO21        | 2.27 |
| NM_013316 | CNOT4        | 2.27 | NM_001444 | FABP5         | 2.27 |
| NM_014509 | DJ222E13.1   | 2.27 | NM_006650 | CPLX2         | 2.27 |
| NM_021808 | GALNT9       | 2.27 | NM_018054 | ARHGAP17      | 2.27 |
| XM_091156 | LOC161823    | 2.27 | XM_372626 | LOC390705     | 2.27 |
| NM_012219 | MRAS         | 2.28 | NM_006037 | HDAC4         | 2.28 |
| NM_152517 | FLJ30990     | 2.28 | NM_207502 | C6ORF122      | 2.28 |
| XM_047770 | LOC144245    | 2.28 | NM_176818 | 15E1.2        | 2.28 |
| NM_006268 | DPF2         | 2.29 | NM_001647 | APOD          | 2.29 |
| XM_370654 | KIAA1726     | 2.29 | NM_138417 | MGC20419      | 2.29 |
| NM_207372 | SH2D4B       | 2.29 | NM_016530 | RAB8B         | 2.3  |
| NM_018222 | PARVA        | 2.31 | NM_003308 | TSPY1         | 2.31 |
| NM_016622 | MRPL35       | 2.31 | NM_006243 | PPP2R5A       | 2.32 |
| NM_144602 | MGC33367     | 2.32 | NM_203300 | LOC147727     | 2.32 |
| XM_117014 | LOC197317    | 2.32 | NM_004580 | RAB27A        | 2.33 |
| NM_000338 | SLC12A1      | 2.33 | NM_002109 | HARS          | 2.33 |
| NM_018168 | C14ORF105    | 2.33 | NM_018207 | FLJ10759      | 2.33 |
| XM_370616 | LOC338645    | 2.33 | NM_004049 | BCL2A1        | 2.34 |
| NM_006584 | CCT6B        | 2.34 | NM_152251 | DEFB106       | 2.34 |
| XM_378949 | LOC400817    | 2.34 | NM_002677 | PMP2          | 2.35 |
| NM_002903 | RCV1         | 2.35 | NM_013389 | NPC1L1        | 2.35 |
| NM_022117 | SE20-4       | 2.35 | NM_032947 | NID67         | 2.35 |
| NM_012206 | HAVCR1       | 2.36 | NM_004209 | SYNGR3        | 2.36 |
| NM_016447 | MPP6         | 2.36 | NM_152834 | TMEM18        | 2.36 |
| XM_293581 | LOC344760    | 2.36 | XM_375914 | LOC400842     | 2.36 |
| NM_001292 | CLK3         | 2.37 | NM_000389 | CDKN1A        | 2.37 |
| NM_020792 | KIAA1363     | 2.37 | NM_030882 | APOL2         | 2.37 |
| NM_152613 | MGC26816     | 2.37 | XM_370980 | LOC388271     | 2.37 |
| XM_371009 | LOC388327    | 2.37 | NM_153251 | FLJ25952      | 2.38 |
| NM_017947 | MOCOS        | 2.38 | NM_024760 | FLJ14009      | 2.38 |
| NM_006509 | RELB         | 2.39 | NM_178519 | FLJ39421      | 2.39 |
| NM_005777 | RBM6         | 2.4  | NM_001933 | DLST          | 2.4  |
| NM_000857 | GUCY1B3      | 2.4  | NM_005535 | IL12RB1       | 2.4  |
| XM_171536 | MRGPRE       | 2.4  | NM_052967 | MAS1L         | 2.41 |
| NM_007136 | ZNF80        | 2.41 | XM_041191 | KIAA0931      | 2.41 |
| NM_020695 | TCEB3BP1     | 2.41 | NM_032487 | ARPM1         | 2.42 |
| NM_176815 | LOC200895    | 2.42 | NM_023012 | FLJ11021      | 2.43 |
| BC020240  | IGHM         | 2.44 | NM_003538 | HIST1H4A      | 2.44 |
| NM_023073 | FLJ13231     | 2.44 | NM_018571 | ALS2CR2       | 2.45 |
| NM_005604 | POU3F2       | 2.45 | NM_005627 | SGK           | 2.46 |
| NM_003028 | SHB          | 2.46 | NM_016004 | C20ORF9       | 2.46 |
| NM_058168 | GDEP         | 2.46 | NM_005379 | MYO1A         | 2.47 |

|           |           |      |           |           |      |
|-----------|-----------|------|-----------|-----------|------|
| NM_015339 | ADNP      | 2.47 | NM_022495 | C14ORF135 | 2.47 |
| NM_152762 | FLJ32880  | 2.47 | XM_371476 | LOC388922 | 2.47 |
| NM_004995 | MMP14     | 2.48 | NM_003778 | B4GALT4   | 2.48 |
| NM_002515 | NOVA1     | 2.49 | NM_021071 | DO        | 2.49 |
| NM_020347 | LZTFL1    | 2.49 | XM_375599 | FLJ21369  | 2.49 |
| NM_145201 | PP3856    | 2.5  | XM_034819 | ZNF629    | 2.51 |
| NM_018974 | UNC93A    | 2.51 | NM_144678 | TOM1L2    | 2.51 |
| XM_113796 | LOC196996 | 2.51 | NM_022447 | PAPD5     | 2.52 |
| NM_006646 | WASF3     | 2.53 | NM_012253 | TKTL1     | 2.53 |
| NM_001782 | CD72      | 2.53 | NM_032364 | DNAJC14   | 2.53 |
| NM_144647 | MGC26610  | 2.53 | NM_019020 | TBC1D16   | 2.53 |
| NM_199352 | LOC387601 | 2.53 | NM_001952 | E2F6      | 2.55 |
| NM_021818 | SAV1      | 2.55 | XM_291344 | FLJ12649  | 2.55 |
| XM_380091 | LOC402466 | 2.55 | XM_370580 | LOC387716 | 2.55 |
| NM_012119 | CCRK      | 2.56 | NM_006948 | STCH      | 2.56 |
| NM_003218 | TERF1     | 2.56 | XM_084578 | PPFIBP2   | 2.56 |
| NM_018622 | PSARL     | 2.56 | NM_007193 | ANXA10    | 2.57 |
| AF120323  | TIAM2     | 2.57 | XM_292895 | LOC344065 | 2.57 |
| NM_007194 | CHEK2     | 2.58 | NM_014245 | RNF7      | 2.58 |
| NM_138791 | C14ORF148 | 2.58 | NM_005735 | ACTR1B    | 2.59 |
| NM_012159 | FBXL3P    | 2.59 | NM_002039 | GAB1      | 2.59 |
| NM_018846 | KLHL7     | 2.59 | NM_018970 | GPR85     | 2.6  |
| NM_000082 | CKN1      | 2.6  | XM_376556 | C6ORF70   | 2.6  |
| NM_145175 | NSE1      | 2.6  | XM_371939 | LOC389541 | 2.6  |
| NM_014497 | NP220     | 2.61 | NM_000841 | GRM4      | 2.62 |
| NM_006941 | SOX10     | 2.62 | NM_032750 | MGC15429  | 2.62 |
| XM_062872 | LOC121952 | 2.62 | NM_000365 | TPI1      | 2.63 |
| NM_033281 | MRPS36    | 2.63 | NM_000676 | ADORA2B   | 2.64 |
| NM_006911 | RLN1      | 2.64 | XM_375080 | KIAA0831  | 2.64 |
| XM_027162 | DMRTA2    | 2.64 | NM_005171 | ATF1      | 2.66 |
| NM_001236 | CBR3      | 2.66 | NM_016406 | UFC1      | 2.66 |
| NM_199001 | MGC59937  | 2.66 | NM_000864 | HTR1D     | 2.67 |
| XM_166526 | USP42     | 2.67 | NM_002831 | PTPN6     | 2.68 |
| NM_178864 | NXF       | 2.68 | NM_134444 | NALP4     | 2.68 |
| NM_022491 | SDS3      | 2.69 | XM_371823 | LOC389394 | 2.69 |
| NM_000697 | ALOX12    | 2.7  | NM_173483 | FLJ39501  | 2.71 |
| XM_377444 | LOC401859 | 2.71 | NM_015356 | SCRIB     | 2.72 |
| NM_004626 | WNT11     | 2.73 | NM_153813 | ZFPM1     | 2.73 |
| XM_060597 | LOC127665 | 2.74 | XM_371469 | LOC388906 | 2.75 |
| NM_002516 | NOVA2     | 2.76 | NM_013348 | KCNJ14    | 2.77 |
| NM_178468 | C20ORF128 | 2.77 | NM_203423 | LOC389199 | 2.78 |
| NM_016030 | TTC15     | 2.79 | NM_024591 | FLJ11749  | 2.79 |
| NM_004654 | USP9Y     | 2.81 | NM_033057 | OR2B2     | 2.83 |
| NM_032192 | PPP1R1B   | 2.84 | NM_005934 | MLLT1     | 2.84 |
| XM_373499 | LOC387765 | 2.86 | NM_052928 | SMYD4     | 2.88 |
| NM_005568 | LHX1      | 2.92 | NM_152250 | DEFB105   | 2.92 |

|           |           |      |              |           |      |
|-----------|-----------|------|--------------|-----------|------|
| NM_005207 | CRKL      | 2.94 | NM_007166    | PICALM    | 2.94 |
| NM_017594 | DIRAS2    | 2.94 | NM_175571    | HIAN6     | 2.94 |
| NM_017771 | PXK       | 2.95 | NM_054030    | MRGX2     | 2.95 |
| NM_207371 | FLJ45187  | 2.95 | NM_144726    | FLJ31951  | 2.96 |
| NM_002061 | GCLM      | 2.97 | NM_015416    | HCCR1     | 2.98 |
| NM_175709 | CBX7      | 2.98 | NM_006583    | RRH       | 2.99 |
| NM_183240 | PR1       | 2.99 | NM_139175    | RNF133    | 3    |
| NM_203403 | C9ORF150  | 3    | NM_006982    | CART1     | 3.05 |
| NM_181620 | KRTAP22-1 | 3.05 | NM_023936    | MRPS34    | 3.1  |
| NM_139076 | FLJ13614  | 3.1  | NM_182640    | MRPS9     | 3.13 |
| NM_000244 | MEN1      | 3.14 | NM_022146    | GPR147    | 3.15 |
| NM_015683 | ARRDC2    | 3.15 | NM_018376    | NIPSNAP3B | 3.17 |
| NM_004527 | MEOX1     | 3.18 | NM_023914    | GPR86     | 3.2  |
| NM_032823 | C9ORF3    | 3.21 | NM_171999    | SALL3     | 3.22 |
| NM_014063 | HIP-55    | 3.23 | NM_002976    | SCN7A     | 3.28 |
| NM_002552 | ORC4L     | 3.28 | NM_015345    | DAAM2     | 3.38 |
| NM_032311 | POLDIP3   | 3.44 | NM_005439    | MLF2      | 3.48 |
| NM_002897 | RBMS1     | 3.5  | XM_058999    | LOC126208 | 3.52 |
| NM_013323 | SNX11     | 3.53 | NM_016217    | HECA      | 3.54 |
| NM_130775 | XAGE-5    | 3.6  | NM_001001693 | FLJ46257  | 3.69 |
| XM_374517 | LOC392779 | 3.73 | NM_004206    | SEC22L3   | 3.83 |
| NM_016508 | CDKL3     | 3.87 | NM_000436    | OXCT1     | 4.05 |
| NM_004380 | CREBBP    | 4.05 | XM_372741    | LOC390956 | 4.08 |
| NM_012443 | SPAG6     | 4.17 | NM_032810    | ATAD1     | 4.18 |
| NM_002285 | LAF4      | 4.28 | NM_016264    | ZNF44     | 4.28 |
| NM_006874 | ELF2      | 4.36 | NM_003887    | DDEF2     | 4.62 |
| NM_152558 | KIAA1023  | 4.76 | NM_173537    | GTF2IRD2  | 5.08 |
| NM_020155 | C11ORF4   | 5.32 |              |           |      |
